# Supplementary material
Source: publisher figshare collection journal article supplement (https://acs.figshare.com/ndownloader/files/4989046)

# Silicon amine reagents for the photocatalytic synthesis of piperazines from aldehydes and ketones

## Supporting Information

Sheng-Ying Hsieh and Jeffrey W. Bode\*

Laboratorium für Organische Chemie, Department of Chemistry and Applied Biosciences  
ETH Zürich, Zürich 8093, Switzerland

bode@org.chem.ethz.ch

### Table of Contents

---

|                                                                    |    |
|--------------------------------------------------------------------|----|
| 1. General information.....                                        | 2  |
| 1.1 Materials .....                                                | 2  |
| 1.2 Blue light reactor and the photocatalytic reaction .....       | 2  |
| 1.3 Reaction monitoring and purification.....                      | 3  |
| 1.4 Characterization instruments.....                              | 3  |
| 2. Preparation of SLAP reagents .....                              | 4  |
| 2.1 Synthesis of SLAP reagent <b>2</b> .....                       | 4  |
| 2.2 Synthesis of SLAP reagent <b>3</b> .....                       | 6  |
| 2.3 Synthesis of SLAP reagent <b>10</b> .....                      | 7  |
| 2.4 Synthesis of SLAP reagent <b>11</b> .....                      | 9  |
| 2.5 Synthesis of SLAP reagent <b>12</b> .....                      | 11 |
| 2.6 Synthesis of SLAP reagent <b>13</b> .....                      | 13 |
| 2.7 Synthesis of SLAP reagent <b>14</b> .....                      | 15 |
| 2.8 Synthesis of SLAP reagent <b>15</b> .....                      | 16 |
| 3. Photocatalytic synthesis of piperazines with SLAP reagents..... | 18 |
| 3.1 Optimized conditions for cyclization.....                      | 18 |
| 3.2 General procedure .....                                        | 20 |
| 3.3 Substrate scope .....                                          | 21 |
| 3.4 Procedure for N-Bn deprotection .....                          | 29 |
| 4. X-ray crystallography .....                                     | 30 |
| 5. NMR spectra .....                                               | 35 |

## 1. General information

Reactions with anhydrous solvents were carried out in oven-dried glassware under N<sub>2</sub> using standard manifold techniques.<sup>1</sup>

### 1.1 Materials

Compounds that are not described in the experimental part were synthesized according to literature procedures. Unless otherwise stated, chemicals were purchased from ABCR, Acros, Alfa Aesar, Apollo Scientific, Fluorochem, Maybridge, Merck, Sigma-Aldrich, Strem, or TCI, and were used without further purification. Common organic solvents were used as supplied (ACS or HPLC grade). Anhydrous MeCN, CH<sub>2</sub>Cl<sub>2</sub>, and THF (HPLC grade) were freshly dried by passage over activated alumina under an inert atmosphere of N<sub>2</sub>. 1,1,1,3,3,3-Hexafluoro-2-propanol is abbreviated to HFIP, and 2,2,2-trifluoroethanol to TFE.

*All the synthesized SLAP reagents were stored under 4 °C to avoid the decomposition.*

### 1.2 Blue light reactor and the photocatalytic reaction

Nichia LumiFlex LED strip (blue light,  $\lambda_{\text{max}} = 467 \text{ nm}$ , 6 W for 30 LEDs) were purchased from Lumitronix<sup>®</sup> LED-Technik (<http://www.leds.de/>) and assembled in a 15×12×12 cm<sup>3</sup> metal case with total 150 blue LEDs (**maximum power: 30 W**). The case was also equipped with a cooling fan (12×12 cm<sup>2</sup>) to maintain the temperature at room temperature. Detailed specification of the blue LEDs can be found in this webpage: <http://www.leds.de/en/LED-strips-modules-oxid-oxid-oxid/Flexible-LED-strips/LumiFlex-LED-Leiste-30-LEDs-50cm-24V-blue.html>.

Photocatalytic reactions were carried out in closed glass vials (sizes depended on reaction scales), neither degassed beforehand nor conducted under dry conditions. The vials were exposed next to the blue LEDs as shown in Figure S1.

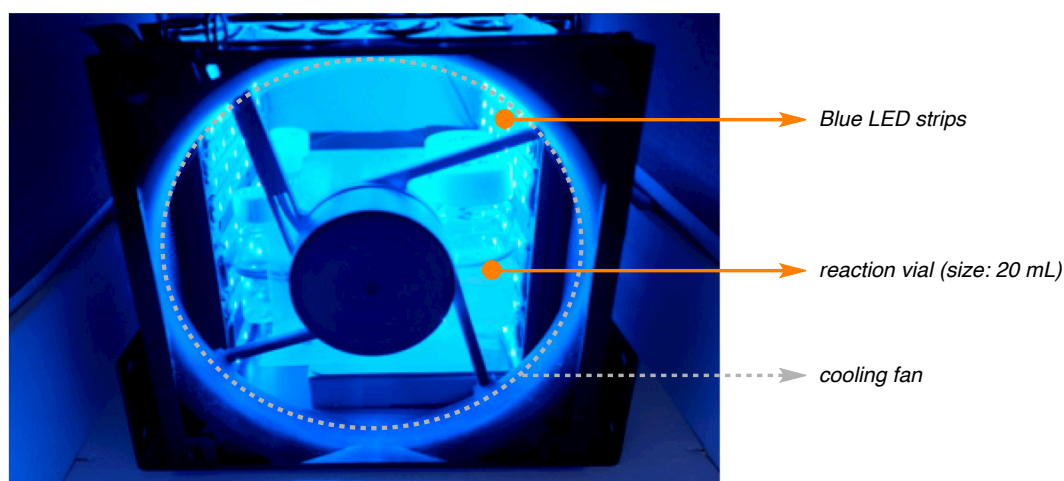

**Figure S1.** Blue light reactor/reaction setup. We thank Mr. Benedikt Wanner from the Bode group of Laboratorium für Organische Chemie at ETH Zürich for the construction of this blue reactor.

(1) Leonard, J.; Lygo, B.; Procter, G. *Advanced Practical Organic Chemistry*, Taylor & Francis, 1998.

### 1.3 Reaction monitoring and purification

Thin layer chromatography (TLC) was performed on glass-backed plates pre-coated with silica gel (*Merck*, Silica Gel 60 F254), and visualized by UV quenching and by staining with basic  $\text{KMnO}_4$ , ninhydrin solution, or phosphomolybdic acid.

Flash column chromatography<sup>2</sup> was performed on silica gel (*Silicycle* SiliaFlash F60, 230–400 mesh) using a forced flow of eluent at 0.4–0.5 bar.

### 1.4 Characterization instruments

NMR spectra were recorded on *Bruker* Avance 400 MHz, and Varian Mercury 300 MHz spectrometers using  $\text{CDCl}_3$  as the solvent unless indicated otherwise. The residual signal of the  $\text{CDCl}_3$  was used as the internal standard (7.26 ppm in  $^1\text{H}$  and 77.160 ppm in  $^{13}\text{C}$  NMR). No additional internal standard was used in the measurement of  $^{19}\text{F}$  NMR. Peaks of  $^{13}\text{C}$  NMR from the major rotamer were marked with asterisks if able to be recognized.

Infrared (IR) data was obtained on a *JASCO* FT-IR-4100 spectrometer with only major peaks being reported.

Optical rotations were measured on a *JASCO* P-2000 polarimeter operating with Tungsten-Halogen (WI) lamp at 589 nm through a 100 mm path length cell.

Melting points (m.p.) were measured on an *Electrothermal Mel-Temp* melting point apparatus and were uncorrected.

High resolution mass spectra were measured by the Mass Spectrometry Service Facility of Laboratorium für Organische Chemie at ETH Zürich on a Bruker Daltonics maXis for ESI-Q-TOF spectrometer (ESI-MS).

(2) Still, W. C.; Kahn, M.; Mitra, A. *J. Org. Chem.* **1978**, *43*, 2923–2925.

## 2. Preparation of SLAP reagents

### 2.1 Synthesis of SLAP reagent 2

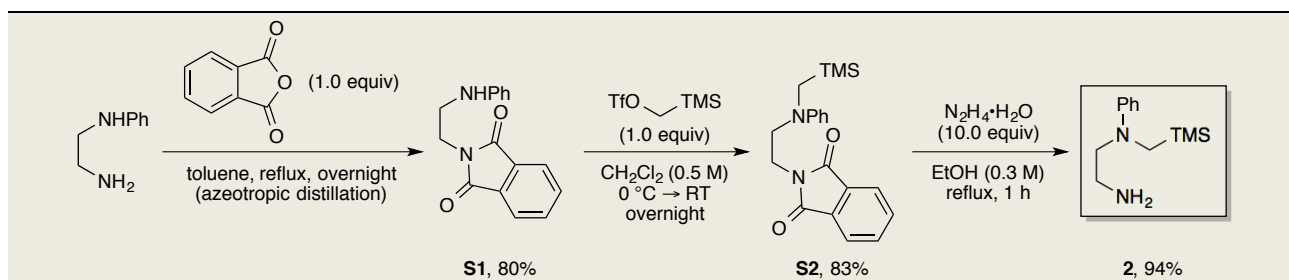

#### 2-(2-(Phenylamino)ethyl)isoindoline-1,3-dione (S1)

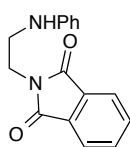

The procedure was modified from the literature.<sup>3</sup> A mixture of *N*-phenylethane-1,2-diamine (2.62 mL, 20.00 mmol, 1.00 equiv) and phthalic anhydride (2.96 g, 20.00 mmol, 1.00 equiv) in toluene (20 mL) was heated for reflux with Dean–Stark apparatus overnight. The reaction was cooled and condensed under *vacuo*. Treated with the mixture of EtOAc and hexanes, the desired product was obtained as a white solid (4.24 g, 80%).

**<sup>1</sup>H NMR** (400 MHz, CDCl<sub>3</sub>): δ [ppm] = 7.84 (dd, *J* = 5.5, 3.0 Hz, 2 H), 7.71 (dd, *J* = 5.5, 3.0 Hz, 2 H), 7.17–7.12 (m, 2 H), 6.69–6.61 (m, 3 H), 4.03 (br, 1 H), 3.97 (t, *J* = 6.1 Hz, 2 H), 3.44 (t, *J* = 6.1 Hz, 2 H); **<sup>13</sup>C NMR** (100 MHz, CDCl<sub>3</sub>): δ [ppm] = 168.7, 147.7, 134.2, 132.1, 129.4, 123.5, 117.7, 112.8, 43.1, 37.6; **HRMS** (ESI): calculated for [C<sub>16</sub>H<sub>15</sub>N<sub>2</sub>O<sub>2</sub>]<sup>+</sup>: *m/z* = 267.1128, found: *m/z* = 267.1129.

#### 2-(2-(Phenyl((trimethylsilyl)methyl)amino)ethyl)isoindoline-1,3-dione (S2)

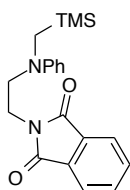

The procedure was modified from the literature.<sup>4</sup> To an ice-cooled solution of **S1** (1.07 g, 4.00 mmol, 1.00 equiv) in anhydrous CH<sub>2</sub>Cl<sub>2</sub> (10 mL, 0.50 M) under N<sub>2</sub> was slowly added (trimethylsilyl)methyl trifluoromethanesulfonate<sup>5</sup> (0.82 mL, 4.00 mmol, 1.00 equiv). The reaction was allowed to warm to room temperature and stirred overnight. After quenched by 5% NaOH<sub>(aq)</sub> (10 mL), the mixture was extracted by CH<sub>2</sub>Cl<sub>2</sub> (3×10 mL). The combined extracts were washed with brine, dried over Na<sub>2</sub>SO<sub>4</sub>, filtered, and condensed under *vacuo*. The residue was purified by flash column chromatography to afford the desired product (1.17 g, 83%) as a yellowish oil.

**<sup>1</sup>H NMR** (400 MHz, CDCl<sub>3</sub>): δ [ppm] = 7.80 (dd, *J* = 5.5, 3.0 Hz, 2 H), 7.68 (dd, *J* = 5.5, 3.0 Hz, 2 H), 7.18–7.12 (m, 2 H), 6.79 (apparent d, *J* = 7.9 Hz, 2 H), 6.55 (apparent t, *J* = 7.2 Hz, 1 H), 3.90–3.86 (m, 2 H), 3.61–3.57 (m, 2 H), 2.93 (s, 2 H), 0.11 (s, 9 H); **<sup>13</sup>C NMR** (100 MHz, CDCl<sub>3</sub>): δ [ppm] = 168.3, 148.8, 134.0, 132.1, 129.1, 123.2, 115.7, 112.4, 50.0, 41.7, 33.9, −1.1; **HRMS** (ESI): calculated for [C<sub>20</sub>H<sub>25</sub>N<sub>2</sub>O<sub>2</sub>Si]<sup>+</sup>: *m/z* = 353.1680, found: *m/z* = 353.1678; **IR** (ν/cm<sup>−1</sup>, neat): 3060, 2952, 2897, 1772, 1714, 1597, 1505, 1394, 1249, 1184, 1122, 1039, 1022, 854, 719.

#### N<sup>1</sup>-phenyl-N<sup>1</sup>-((trimethylsilyl)methyl)ethane-1,2-diamine (2)

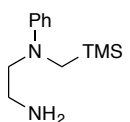

Hydrazine monohydrate (1.62 mL, 33.20 mmol, 10.00 equiv) was added to a solution of **S2** (1.17 g, 3.30 mmol, 1.00 equiv) in EtOH (10 mL, 0.30 M). The mixture was heated under reflux for 1 h and the white solids precipitated during the reaction. The reaction was cooled to room temperature and sufficient amount of 5% NaOH<sub>(aq)</sub> was added to dissolve the white precipitates. EtOH was removed under *vacuo* and the remained aqueous layer was extracted by CH<sub>2</sub>Cl<sub>2</sub> (3×10 mL). The combined extracts were washed with brine, dried over Na<sub>2</sub>SO<sub>4</sub>, filtered, and condensed under *vacuo* to afford the desired product (0.69 g, 94%) as a colorless oil without further purification.

(3) Cul, A.; Daich, A.; Decroix, B.; Sanz, G.; Van Hijfte, L. *Tetrahedron* **2004**, *60*, 11029–11039.

(4) Kawanishi, N.; Shirai, N.; Sato, Y.; Hatano, K.; Kurono, Y. *J. Org. Chem.* **1995**, *60*, 4272–4275.

(5) (a) The reagent was prepared from (trimethylsilyl)methanol and triflate anhydride by the procedure reported in Anderson, W. K.; Milowsky, A. S. *J. Med. Chem.* **1986**, *29*, 2241–2249; (b) *d* = 1.16 g/mL.



**<sup>1</sup>H NMR** (400 MHz, CDCl<sub>3</sub>): δ [ppm] = 7.22–7.17 (m, 2 H), 6.69 (dt, *J* = 7.8, 1.0 Hz, 2 H), 6.63 (tt, *J* = 7.1, 1.0 Hz, 1 H), 3.37 (t, *J* = 6.9 Hz, 2 H), 2.91 (t, *J* = 6.9 Hz, 2 H), 2.90 (s, 2 H), 1.14 (br, 2 H), 0.08 (s, 9 H); **<sup>13</sup>C NMR** (100 MHz, CDCl<sub>3</sub>): δ [ppm] = 149.4, 129.0, 115.4, 112.4, 55.9, 42.5, 38.9, –0.9; **HRMS** (ESI): calculated for [C<sub>12</sub>H<sub>23</sub>N<sub>2</sub>Si]<sup>+</sup>: *m/z* = 223.1625, found: *m/z* = 223.1627; **IR** (v/cm<sup>–1</sup>, neat): 3366, 3296, 3060, 2952, 1597, 1505, 1382, 1248, 1193, 1034, 990, 850, 744, 693.

## 2.2 Synthesis of SLAP reagent 3

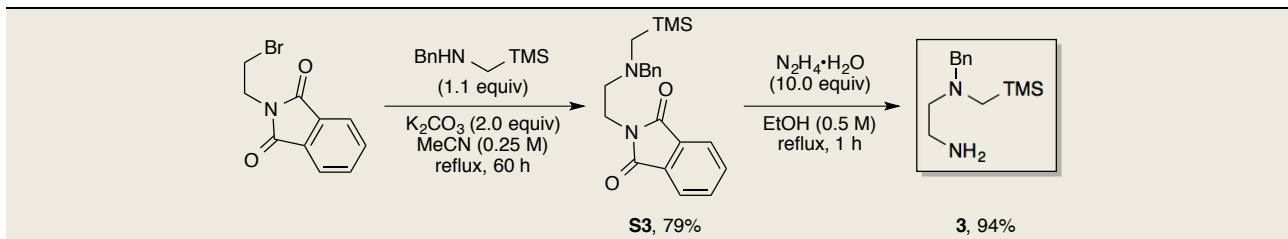

## 2-(2-(Benzyl((trimethylsilyl)methyl)amino)ethyl)isoindoline-1,3-dione (S3)

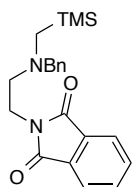

A mixture of 2-(2-bromoethyl)isoindoline-1,3-dione (7.62 g, 30.00 mmol, 1.00 equiv), *N*-benzyl-1-(trimethylsilyl)ethanamine (7.25 mL, 33.00 mmol, 1.10 equiv), and  $\text{K}_2\text{CO}_3$  (8.29 g, 60.00 mmol, 2.00 equiv) in MeCN (120 mL, 0.25 M) was heated under reflux for 2 days. The reaction was cooled to room temperature, filtered, washed with  $\text{CH}_2\text{Cl}_2$ . The combined filtrate was condensed and the residue was purified by flash column chromatography to afford the desired product (8.63 g, 79%) as a colorless oil.

**$^1\text{H}$  NMR** (400 MHz,  $\text{CDCl}_3$ ):  $\delta$  [ppm] = 7.81 (dd,  $J$  = 5.5, 3.0 Hz, 2 H), 7.71 (dd,  $J$  = 5.5, 3.0 Hz, 2 H), 7.17–7.09 (m, 5 H), 3.77 (t,  $J$  = 6.3 Hz, 2 H), 3.54 (s, 2 H), 2.60 (t,  $J$  = 6.3 Hz, 2 H), 2.09 (s, 2 H), 0.03 (s, 9 H);  **$^{13}\text{C}$  NMR** (100 MHz,  $\text{CDCl}_3$ ):  $\delta$  [ppm] = 168.2, 139.8, 133.8, 132.4, 128.8, 128.1, 126.8, 123.1, 61.9, 54.9, 46.3, 36.0, –1.2; **HRMS** (ESI): calculated for  $[\text{C}_{21}\text{H}_{27}\text{N}_2\text{O}_2\text{Si}]^+$ :  $m/z$  = 367.1836, found:  $m/z$  = 367.1838; **IR** ( $\text{v}/\text{cm}^{-1}$ , neat): 2952, 2793, 1772, 1714, 1395, 1248, 1085, 1069, 1018, 855, 721.

*N*<sup>1</sup>-benzyl-*N*<sup>1</sup>-((trimethylsilyl)methyl)ethane-1,2-diamine (3)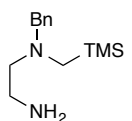

Hydrazine monohydrate (11.15 mL, 228.70 mmol, 10.00 equiv) was added to a solution of **S3** (8.36 g, 22.90 mmol, 1.00 equiv) in EtOH (46 mL, 0.50 M). The mixture was heated under reflux for 1 h and the white solids precipitated during the reaction. The reaction was cooled to room temperature and sufficient amount of 5%  $\text{NaOH}_{(\text{aq})}$  was added to dissolve the white precipitates. EtOH was removed under *vacuo* and the remained aqueous layer was extracted by  $\text{CH}_2\text{Cl}_2$  (3×50 mL). The combined extracts were washed with brine, dried over  $\text{Na}_2\text{SO}_4$ , filtered, and condensed under *vacuo* to afford the desired product (5.12 g, 94%) as a colorless oil without further purification.

**$^1\text{H}$  NMR** (400 MHz,  $\text{CDCl}_3$ ):  $\delta$  [ppm] = 7.35–7.23 (m, 5 H), 3.53 (s, 2 H), 2.72 (t,  $J$  = 5.9 Hz, 2 H), 2.39 (t,  $J$  = 5.9 Hz, 2 H), 2.00 (s, 2 H), 1.30 (br, 2 H), 0.10 (s, 9 H);  **$^{13}\text{C}$  NMR** (100 MHz,  $\text{CDCl}_3$ ):  $\delta$  [ppm] = 140.2, 128.9, 128.3, 126.9, 62.4, 60.4, 46.4, 39.8, –1.2; **HRMS** (ESI): calculated for  $[\text{C}_{13}\text{H}_{25}\text{N}_2\text{Si}]^+$ :  $m/z$  = 237.1782, found:  $m/z$  = 237.1785; **IR** ( $\text{v}/\text{cm}^{-1}$ , neat): 3369, 3028, 2952, 2789, 1585, 1453, 1248, 1028, 854, 738, 699.

## 2.3 Synthesis of SLAP reagent 10

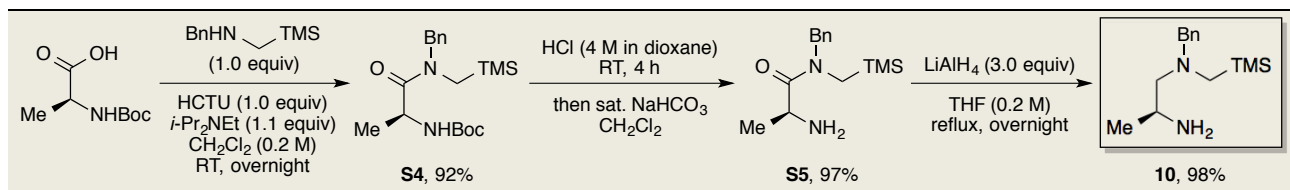**(*S*)-tert-Butyl (1-(benzyl((trimethylsilyl)methyl)amino)-1-oxopropan-2-yl)carbamate (S4)**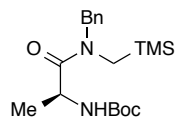

The procedure was modified from the literature.<sup>6</sup> To a mixture of *N*-Boc-L-alanine (3.78 g, 20.00 mmol, 1.00 equiv) and *N,N,N',N'*-tetramethyl-*O*-(6-chloro-1*H*-benzotriazol-1-yl)uronium hexafluorophosphate (HCTU, 9.10 g, 22.00 mmol, 1.10 equiv) in anhydrous CH<sub>2</sub>Cl<sub>2</sub> (100 mL, 0.20 M) was sequentially added *i*-Pr<sub>2</sub>NEt (7.61 mL, 44.00 mmol, 2.20 equiv) and *N*-benzyl-1-(trimethylsilyl)methanamine (4.40 mL, 20.00 mmol, 1.00 equiv). The mixture was stirred under N<sub>2</sub> at room temperature overnight. The reaction was washed with 1 N HCl<sub>(aq)</sub> (3×50 mL), sat. NaHCO<sub>3(aq)</sub> (1×50 mL), and brine. The final organic layer was dried over Na<sub>2</sub>SO<sub>4</sub>, filtered, and condensed under *vacuo*. The residue was purified by flash column chromatography to afford the desired product (6.68 g, 92%) as a colorless oil.

$[\alpha]_D^{24}$  (*c* = 1.0, CHCl<sub>3</sub>) = −27.7; the ratio of rotamers was 75:25 as determined by <sup>1</sup>H NMR at room temperature; <sup>1</sup>H NMR (400 MHz, CDCl<sub>3</sub>): δ [ppm] = 7.38–7.26 (m, 3.00 H), 7.20–7.15 (m, 2.00 H), 5.57 (d, *J* = 8.2 Hz, 0.25 H), 5.44 (d, *J* = 8.2 Hz, 0.75 H), 5.03 (d, *J* = 14.8 Hz, 0.25 H), 4.73–4.65 (m, 1.00 H), 4.66 (d, *J* = 16.5 Hz, 0.75 H), 4.57 (d, *J* = 16.5 Hz, 0.75 H), 4.19 (d, *J* = 14.8 Hz, 0.25 H), 2.87 (s, 1.50 H), 2.83 (s, 0.50 H), 1.45 (s, 2.25 H), 1.43 (s, 6.75 H), 1.36 (d, *J* = 6.7 Hz, 0.75 H), 1.27 (d, *J* = 6.8 Hz, 2.25 H), 0.13 (s, 2.25 H), 0.06 (s, 6.75 H); <sup>13</sup>C NMR (100 MHz, CDCl<sub>3</sub>): δ [ppm] = 172.7, 172.3\*, 155.2\*, 155.0, 136.9, 136.4\*, 129.0, 128.7\*, 127.8, 127.7\*, 127.5\*, 126.8, 79.5\*, 79.4, 53.2\*, 50.2, 46.4, 46.0\*, 38.7\*, 38.1, 28.44, 28.43\*, 19.5\*, 19.4, −1.2\*, −1.6; HRMS (ESI): calculated for [C<sub>19</sub>H<sub>32</sub>N<sub>2</sub>NaO<sub>3</sub>Si]<sup>+</sup>: *m/z* = 387.2074, found: *m/z* = 387.2074; IR (ν/cm<sup>−1</sup>, neat): 3424, 3311, 2978, 1713, 1634, 1453, 1366, 1249, 1169, 1028, 854, 731, 698.

**(*S*)-2-Amino-*N*-benzyl-*N*-((trimethylsilyl)methyl)propanamide (S5)**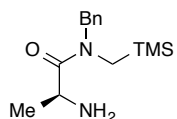

The procedure was modified from the literature.<sup>6</sup> A solution of HCl in dioxane (4.0 M, 30.9 mL, 123.4 mmol, 15.0 equiv) was added to **S4** (3.0 g, 8.2 mmol, 1.0 equiv), and the mixture was stirred at room temperature for 4 h. The reaction was condensed under *vacuo* to remove the excess HCl in dioxane, and the residue was basified and partitioned with sat. NaHCO<sub>3(aq)</sub> and CH<sub>2</sub>Cl<sub>2</sub>. The organic layer was separated and the basic aqueous layer was extracted with CH<sub>2</sub>Cl<sub>2</sub> for twice. Organic extracts were combined, dried over Na<sub>2</sub>SO<sub>4</sub>, filtered, and condensed under *vacuo* to afford the deprotected amine (2.1 g, 97%) as a colorless oil without further purification.

$[\alpha]_D^{25}$  (*c* = 1.0, CHCl<sub>3</sub>) = −50.2; the ratio of rotamers was 75:25 as determined by <sup>1</sup>H NMR at room temperature; <sup>1</sup>H NMR (400 MHz, CDCl<sub>3</sub>): δ [ppm] = 7.36–7.24 (m, 3 H), 7.16–7.12 (m, 2 H), 5.10 (d, *J* = 14.8 Hz, 0.25 H), 4.63 (d, *J* = 16.7 Hz, 0.75 H), 4.37 (d, *J* = 16.7 Hz, 0.75 H), 4.06 (d, *J* = 14.8 Hz, 0.25 H), 3.78–3.70 (m, 1 H), 3.15 (d, *J* = 14.9 Hz, 0.75 H), 2.83 (d, *J* = 16.3 Hz, 0.25 H), 2.68 (d, *J* = 16.3 Hz, 0.25 H), 2.57 (d, *J* = 14.9 Hz, 0.75 H), 1.70 (br, 2 H), 1.27 (d, *J* = 6.8 Hz, 0.75 H), 1.27 (d, *J* = 6.7 Hz, 2.25 H), 0.10 (s, 2.25 H), 0.04 (s, 6.75 H); <sup>13</sup>C NMR (100 MHz, CDCl<sub>3</sub>): δ [ppm] = 176.1, 175.7\*, 137.3, 136.6\*, 129.0\*, 128.7, 127.81, 127.77\*, 127.4, 126.4\*, 52.8\*, 50.3, 47.0, 46.9\*, 38.9\*, 37.6, 22.2\*, 21.4, −1.2\*, −1.5; HRMS (ESI): calculated for [C<sub>14</sub>H<sub>25</sub>N<sub>2</sub>O<sub>2</sub>Si]<sup>+</sup>: *m/z* = 265.1731, found: *m/z* = 265.1734; IR (ν/cm<sup>−1</sup>, neat): 3364, 3297, 2953, 2897, 1633, 1453, 1248, 995, 851, 732, 697.

(6) Fang, Y.-Q.; Jacobsen, E. N. *J. Am. Chem. Soc.* **2008**, *130*, 5660–5661.

**(S)-N<sup>1</sup>-Benzyl-N<sup>1</sup>-((trimethylsilyl)methyl)propane-1,2-diamine (10)**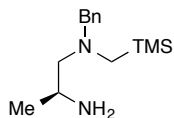

To an ice-cooled solution of **S5** (1.85 g, 7.00 mmol, 1.00 equiv) in anhydrous THF (35 mL, 0.20 M), LiAlH<sub>4</sub> (0.80 g, 21.00 mmol, 3.00 equiv) was added slowly and portionwise (CAUTION!<sup>7</sup>). After the addition was complete, the mixture was heated under reflux overnight. The reaction was cooled to room temperature and quenched with 20% NaOH<sub>(aq)</sub> before filtered and washed with EtOAc. The combined filtrate was condensed under *vacuo*, and the desired product was obtained as a colorless oil without further purification (1.71 g, 98%).

$[\alpha]_D^{25}$  (c = 1.0, CHCl<sub>3</sub>) = +85.8; <sup>1</sup>H NMR (400 MHz, CDCl<sub>3</sub>): δ [ppm] = 7.32–7.27 (m, 4 H), 7.24–7.20 (m, 1 H), 3.73 (d, *J* = 13.5 Hz, 1 H), 3.26 (d, *J* = 13.5 Hz, 1 H), 3.02–2.94 (m, 1 H), 2.17 (dd, *J* = 12.2, 9.1 Hz, 1 H), 2.11 (dd, *J* = 12.2, 4.4 Hz, 1 H), 2.10 (d, *J* = 14.8 Hz, 1 H), 1.88 (br, 2 H), 1.85 (d, *J* = 14.8 Hz, 1 H), 0.97 (d, *J* = 6.4 Hz, 3 H), 0.07 (s, 9 H); <sup>13</sup>C NMR (100 MHz, CDCl<sub>3</sub>): δ [ppm] = 140.0, 129.0, 128.3, 127.0, 66.7, 62.7, 47.0, 44.6, 21.0, –1.1; HRMS (ESI): calculated for [C<sub>14</sub>H<sub>27</sub>N<sub>2</sub>Si]<sup>+</sup>: *m/z* = 251.1938, found: *m/z* = 251.1941; IR (ν/cm<sup>–1</sup>, neat): 3359, 2956, 2790, 1585, 1453, 1365, 1248, 1062, 840, 740, 699.

(7) The addition of LiAlH<sub>4</sub> must be slow. Stop the addition if the reaction is too drastic, and continue the addition while the reaction returns gentle.

## 2.4 Synthesis of SLAP reagent 11

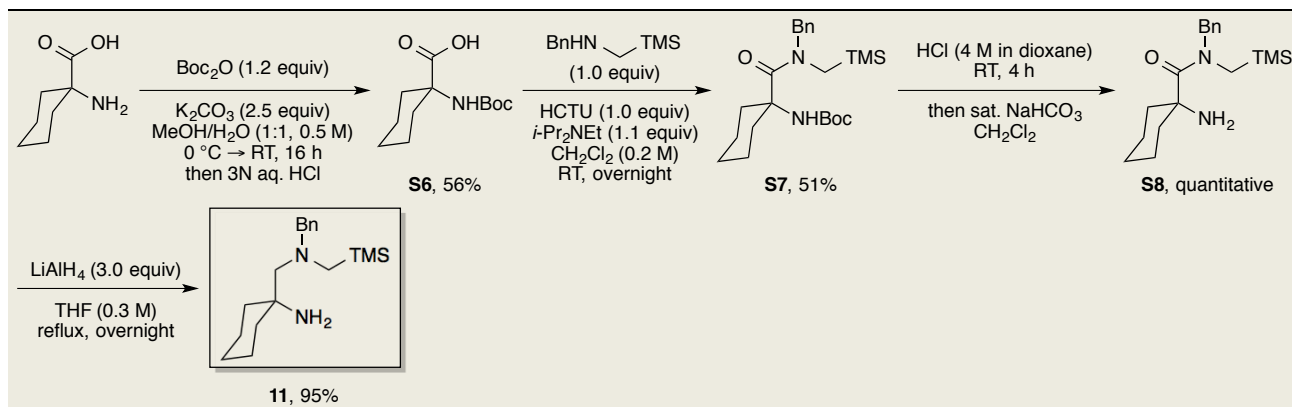1-((*tert*-Butoxycarbonyl)amino)cyclohexanecarboxylic acid (**S6**)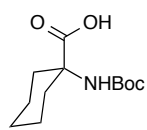

The procedure was modified from the literature.<sup>8</sup>  $\text{K}_2\text{CO}_3$  (34.6 g, 250.0 mmol, 2.5 equiv) was added to a solution of 1-aminocyclohexanecarboxylic acid (14.3 g, 100.0 mmol, 1.0 equiv) in MeOH (50 mL) and  $\text{H}_2\text{O}$  (100 mL). A solution of  $\text{Boc}_2\text{O}$  (26.2 g, 120.0 mmol, 1.2 equiv) in MeOH (50 mL) was added dropwise at  $0^\circ\text{C}$ . The mixture was allowed to warm to room temperature and stirred for 16 h before condensed under *vacuo*. The residue was cooled to  $0^\circ\text{C}$ , acidified with 3 N  $\text{HCl}_{(\text{aq})}$  to pH = 5 (ca. 180 mL), and extracted with EtOAc ( $4 \times 150$  mL). The extracts were combined, washed with brine, dried over  $\text{Na}_2\text{SO}_4$ , filtered, and condensed under *vacuo* to afford the crude product. After washed with  $\text{Et}_2\text{O}$ , the pure product was obtained as a white solid (13.7 g, 56%).

$^1\text{H}$  NMR (400 MHz,  $\text{CD}_3\text{OD}$ ):  $\delta$  [ppm] = 4.88 (br, 2 H), 2.02–1.98 (m, 2 H), 1.78 (ddd,  $J$  = 13.8, 12.6, 4.2 Hz, 2 H), 1.53–1.45 (m, 5 H), 1.43 (s, 9 H), 1.37–1.22 (m, 1H);  $^{13}\text{C}$  NMR (100 MHz,  $\text{CD}_3\text{OD}$ ):  $\delta$  [ppm] = 178.8, 157.3, 80.1, 59.8, 33.6, 28.8, 26.5, 22.5.

*tert*-Butyl 1-(benzyl((trimethylsilyl)methyl)carbamoyl)cyclohexyl)carbamate (**S7**)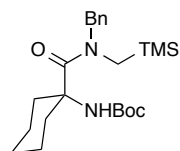

The procedure was modified from the literature.<sup>6</sup> To a mixture of **S6** (4.87 g, 20.00 mmol, 1.00 equiv) and *N,N,N',N'*-tetramethyl-*O*-(6-chloro-1*H*-benzotriazol-1-yl)uronium hexafluorophosphate (HCTU, 9.10 g, 22.00 mmol, 1.10 equiv) in anhydrous  $\text{CH}_2\text{Cl}_2$  (100 mL, 0.20 M) was sequentially added  $i\text{-Pr}_2\text{NEt}$  (7.61 mL, 44.00 mmol, 2.20 equiv) and *N*-benzyl-1-(trimethylsilyl)methanamine (4.40 mL, 20.00 mmol, 1.00 equiv). The mixture was stirred under  $\text{N}_2$  at room temperature overnight. The reaction was washed with 1 N  $\text{HCl}_{(\text{aq})}$  ( $3 \times 50$  mL), sat.  $\text{NaHCO}_3_{(\text{aq})}$  ( $1 \times 50$  mL), and brine. The final organic layer was dried over  $\text{Na}_2\text{SO}_4$ , filtered, and condensed under *vacuo*. The residue was purified by flash column chromatography to afford the desired product (4.24 g, 51%) as a white solid.

**m.p.**: 120–121  $^\circ\text{C}$ ;  $^1\text{H}$  NMR (400 MHz,  $\text{CDCl}_3$ ):  $\delta$  [ppm] = 7.36–7.20 (m, 5 H), 4.90 (s, 2 H), 4.77 (br, 1 H), 2.76 (s, 2 H), 2.11 (apparent d,  $J$  = 13.8 Hz, 2 H), 1.96 (apparent dt,  $J$  = 13.8, 6.8 Hz, 2 H), 1.72–1.59 (m, 3 H), 1.42 (s, 9 H), 1.35–1.29 (m, 3 H), 0.04 (s, 9 H);  $^{13}\text{C}$  NMR (100 MHz,  $\text{CDCl}_3$ ):  $\delta$  [ppm] = 172.3, 153.7, 137.5, 128.7, 127.3, 127.2, 79.7, 59.1, 53.3, 39.4, 33.2, 28.5, 25.3, 21.7,  $-0.8$ ; **HRMS** (ESI): calculated for  $[\text{C}_{23}\text{H}_{39}\text{N}_2\text{O}_3\text{Si}]^+$ :  $m/z$  = 419.2724, found:  $m/z$  = 419.2721; **IR** ( $\nu/\text{cm}^{-1}$ , neat): 3286, 2931, 1693, 1619, 1496, 1390, 1366, 1247, 1163, 853, 731.

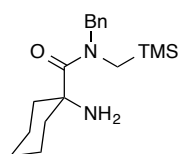1-Amino-*N*-benzyl-*N*-((trimethylsilyl)methyl)cyclohexanecarboxamide (**S8**)

The procedure was modified from the literature.<sup>[6]</sup> A solution of HCl in dioxane (4.0 M, 60.0 mL, 240.0 mmol, 15.0 equiv) was added to **S7** (6.7 g, 16.0 mmol, 1.0 equiv), and the mixture was stirred at room temperature for 4 h. The reaction was condensed under *vacuo*

to remove the excess HCl in dioxane, and the residue was basified and partitioned with sat.  $\text{NaHCO}_3(\text{aq})$  and  $\text{CH}_2\text{Cl}_2$ . The organic layer was separated and the basic aqueous layer was extracted with  $\text{CH}_2\text{Cl}_2$  for twice. Organic extracts were combined, dried over  $\text{Na}_2\text{SO}_4$ , filtered, and condensed under *vacuo* to afford the deprotected amine (5.1 g, quantitative) as a white solid without further purification.

**m.p.:** 65–66 °C;  **$^1\text{H}$  NMR** (400 MHz,  $\text{CDCl}_3$ ):  $\delta$  [ppm] = 7.36–7.31 (m, 2 H), 7.27–7.23 (m, 1 H), 7.19–7.16 (m, 2 H), 5.22 (s, 2 H), 2.73 (s, 2 H), 2.03 (ddd,  $J$  = 13.9, 10.5, 3.7 Hz, 1 H), 1.67–1.29 (m, 10 H), 0.04 (s, 9 H);  **$^{13}\text{C}$  NMR** (100 MHz,  $\text{CDCl}_3$ ):  $\delta$  [ppm] = 175.3, 138.4, 128.7, 127.1, 126.8, 58.4, 54.4, 39.8, 37.4, 25.6, 22.2, –0.8; **HRMS** (ESI): calculated for  $[\text{C}_{18}\text{H}_{31}\text{N}_2\text{OSi}]^+$ :  $m/z$  = 319.2200, found:  $m/z$  = 319.2201; **IR** ( $\text{v}/\text{cm}^{-1}$ , neat): 2925, 2857, 1620, 1452, 1246, 853, 728, 697.

### 1-((Benzyl((trimethylsilyl)methyl)amino)methyl)cyclohexanamine (11)

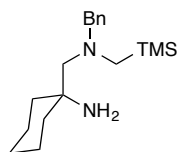

To an ice-cooled solution of **S8** (4.78 g, 15.00 mmol, 1.00 equiv) in anhydrous THF (45 mL, 0.30 M),  $\text{LiAlH}_4$  (1.71 g, 45.00 mmol, 3.00 equiv) was added slowly and portionwise (CAUTION!<sup>7</sup>). After the addition was complete, the mixture was heated under reflux overnight. The reaction was cooled to room temperature and quenched with 20%  $\text{NaOH}(\text{aq})$  before filtered and washed with EtOAc. The combined filtrate was condensed under *vacuo*, and the desired product was obtained as colorless oil without further purification (4.34 g, 95%).

**$^1\text{H}$  NMR** (400 MHz,  $\text{CDCl}_3$ ):  $\delta$  [ppm] = 7.36–7.29 (m, 4 H), 7.26–7.22 (m, 1 H), 3.61 (s, 2 H), 2.37 (s, 2 H), 2.23 (s, 2 H), 1.52–1.35 (m, 5 H), 1.29–1.18 (m, 7 H), 0.12 (s, 9 H);  **$^{13}\text{C}$  NMR** (100 MHz,  $\text{CDCl}_3$ ):  $\delta$  [ppm] = 140.4, 129.2, 128.2, 126.9, 69.6, 64.5, 52.0, 50.8, 37.6, 26.2, 22.0, –0.8; **HRMS** (ESI): calculated for  $[\text{C}_{18}\text{H}_{33}\text{N}_2\text{Si}]^+$ :  $m/z$  = 305.2408, found:  $m/z$  = 305.2407; **IR** ( $\text{v}/\text{cm}^{-1}$ , neat): 2926, 2853, 1495, 1450, 1363, 1247, 1068, 855, 741, 699.

## 2.5 Synthesis of SLAP reagent 12

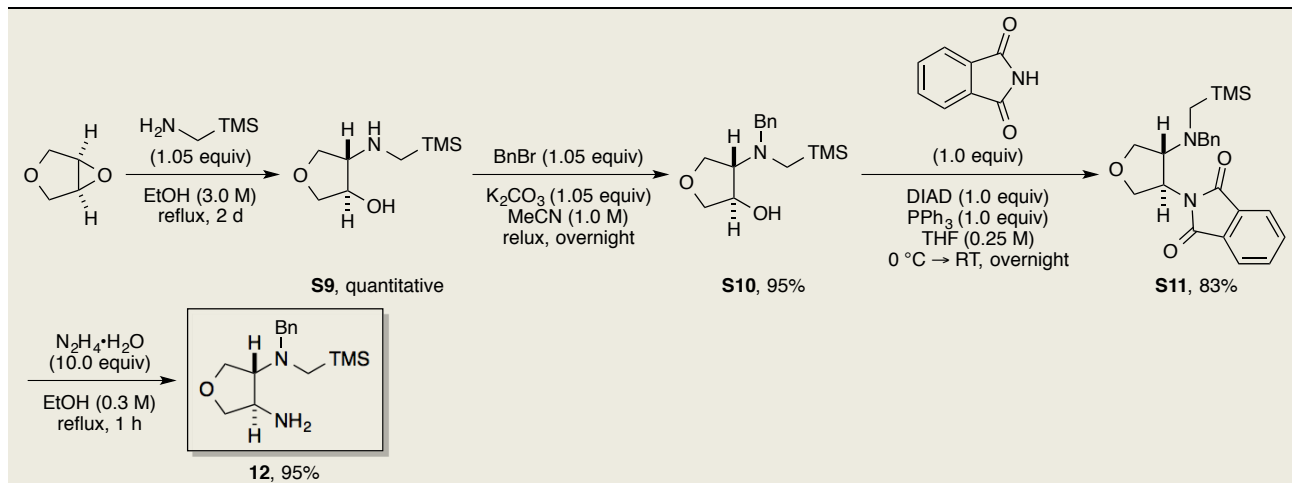***trans*-4-(((Trimethylsilyl)methyl)amino)tetrahydrofuran-3-ol (S9)**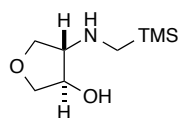

To a solution of 3,4-epoxytetrahydrofuran (2.15 mL, 30.00 mmol, 1.00 equiv) in EtOH (10 mL, 3.00 M) was added (trimethylsilyl)methanamine (4.22 mL, 31.50 mmol, 1.05 equiv). The mixture was heated under reflux for 2 days. The reaction was cooled to room temperature and condensed under *vacuo* to afford the desired product (5.67 g, quantitative) as a colorless oil without further purification.

**$^1\text{H}$  NMR** (400 MHz,  $\text{CDCl}_3$ ):  $\delta$  [ppm] = 4.13 (ddd,  $J$  = 4.3, 2.7, 1.3 Hz, 1 H), 4.04 (dd,  $J$  = 9.1, 5.6 Hz, 1 H), 3.95 (dd,  $J$  = 9.8, 4.6 Hz, 1 H), 3.65 (dd,  $J$  = 9.8, 2.7 Hz, 1 H), 3.55 (dd,  $J$  = 9.1, 3.4 Hz, 1 H), 3.08 (ddd,  $J$  = 5.6, 3.4, 1.3 Hz, 1 H), 2.20 (br, 2 H), 2.05 (s, 2 H), 0.02 (s, 9 H);  **$^{13}\text{C}$  NMR** (100 MHz,  $\text{CDCl}_3$ ):  $\delta$  [ppm] = 76.1, 74.2, 72.3, 70.7, 38.4, -2.6; **HRMS** (ESI): calculated for  $[\text{C}_8\text{H}_{20}\text{NO}_2\text{Si}]^+$ :  $m/z$  = 190.1258, found:  $m/z$  = 190.1262; **IR** ( $\text{v}/\text{cm}^{-1}$ , neat): 3390, 2953, 2871, 1660, 1464, 1421, 1249, 1074, 856.

***trans*-4-(Benzyl((trimethylsilyl)methyl)amino)tetrahydrofuran-3-ol (S10)**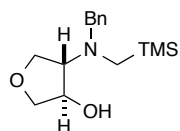

A mixture of **S9** (5.67 g, 30.00 mmol, 1.00 equiv), BnBr (3.74 mL, 31.50 mmol, 1.05 equiv) and  $\text{K}_2\text{CO}_3$  (4.57 g, 31.50 mmol, 1.05 equiv) in MeCN (30 mL, 1.00 M) was heated under reflux overnight. The reaction was cooled to room temperature, filtered, and washed with  $\text{CH}_2\text{Cl}_2$ . The combined filtrate was condensed under *vacuo* to afford the desired product (7.93 g, 95%) as a yellowish oil without further purification.

**$^1\text{H}$  NMR** (400 MHz,  $\text{CDCl}_3$ ):  $\delta$  [ppm] = 7.39–7.32 (m, 4 H), 7.29–7.25 (m, 1 H), 4.42 (ddd,  $J$  = 5.8, 4.2, 3.0 Hz, 1 H), 3.96 (dd,  $J$  = 9.8, 5.8 Hz, 1 H), 3.91 (dd,  $J$  = 9.6, 7.8 Hz, 1 H), 3.71 (dd,  $J$  = 9.6, 5.5 Hz, 1 H), 3.65 (apparent d,  $J$  = 3.2 Hz, 2 H), 3.58 (dd,  $J$  = 9.8, 4.2 Hz, 1 H), 3.26 (ddd,  $J$  = 7.8, 5.5, 3.0 Hz, 1 H), 2.20 (br, 1 H), 2.12 (d,  $J$  = 14.8 Hz, 1 H), 2.04 (d,  $J$  = 14.8 Hz, 1 H), 0.10 (s, 9 H);  **$^{13}\text{C}$  NMR** (100 MHz,  $\text{CDCl}_3$ ):  $\delta$  [ppm] = 139.8, 128.6, 128.4, 127.1, 75.1, 72.9, 71.7, 69.1, 59.4, 42.4, -1.3; **HRMS** (ESI): calculated for  $[\text{C}_{15}\text{H}_{26}\text{NO}_2\text{Si}]^+$ :  $m/z$  = 280.1727, found:  $m/z$  = 280.1728; **IR** ( $\text{v}/\text{cm}^{-1}$ , neat): 3410, 2952, 2860, 1495, 1454, 1422, 1365, 1249, 1074, 856, 740, 699.

**2-(*trans*-4-(Benzyl((trimethylsilyl)methyl)amino)tetrahydrofuran-3-yl)isoindoline-1,3-dione (S11)**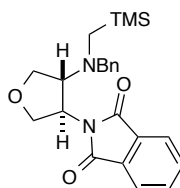

**S10** (5.55 g, 20.00 mmol, 1.00 equiv), phthalimide (2.94 g, 20.00 mmol, 1.00 equiv), and  $\text{PPh}_3$  (5.25 g, 20.00 mmol, 1.00 equiv) were dissolved in anhydrous THF (80 mL, 0.25 M) under  $\text{N}_2$ . This clear solution was cooled to 0 °C and diisopropyl azodicarboxylate (DIAD, 3.94 mL, 20.00 mmol, 1.00 equiv) was added dropwise. The reaction was allowed to warm to room temperature and stirred under  $\text{N}_2$  overnight. After the solvent was removed under *vacuo*, the residue was purified by flash column chromatography to afford the *trans*

product<sup>9</sup> (6.67 g, 83%) as a yellowish oil.

**<sup>1</sup>H NMR** (400 MHz, CDCl<sub>3</sub>): δ [ppm] = 7.84–7.79 (m, 2 H), 7.75–7.71 (m, 2 H), 7.10–7.00 (m, 5 H), 4.96 (ddd, *J* = 8.7, 8.7, 4.6 Hz, 1 H), 4.14–4.07 (m, 2 H), 3.99–3.84 (m, 3 H), 3.68 (d, *J* = 13.9 Hz, 1 H), 3.40 (d, *J* = 13.9 Hz, 1 H), 2.16 (d, *J* = 14.8 Hz, 1 H), 2.03 (d, *J* = 14.8 Hz, 1 H), 0.03 (s, 9 H); **<sup>13</sup>C NMR** (100 MHz, CDCl<sub>3</sub>): δ [ppm] = 167.8, 139.4, 134.2, 131.8, 128.3, 128.2, 127.0, 123.3, 70.9, 68.9, 65.1, 58.8, 49.4, 40.5, –1.4; **HRMS** (ESI): calculated for [C<sub>23</sub>H<sub>29</sub>N<sub>2</sub>O<sub>3</sub>Si]<sup>+</sup>: *m/z* = 409.1942, found: *m/z* = 409.1943; **IR** (ν/cm<sup>–1</sup>, neat): 2953, 2877, 1773, 1714, 1387, 1248, 1088, 924, 857, 720.

***trans*-N<sup>3</sup>-Benzyl-N<sup>3</sup>-((trimethylsilyl)methyl)tetrahydrofuran-3,4-diamine (12)**

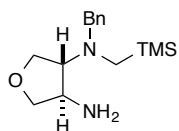

Hydrazine monohydrate (2.98 mL, 61.20 mmol, 10.00 equiv) was added to a solution of **S11** (2.50 g, 6.10 mmol, 1.00 equiv) in EtOH (18 mL, 0.30 M). The mixture was heated under reflux for 1 h and the white solids precipitated during the reaction. The reaction was cooled to room temperature and sufficient amount of 5% NaOH<sub>(aq)</sub> was added to dissolve the white precipitates. EtOH was removed under *vacuo* and the remained aqueous layer was extracted by CH<sub>2</sub>Cl<sub>2</sub> (3×20 mL). The combined extracts were washed with brine, dried over Na<sub>2</sub>SO<sub>4</sub>, filtered, and condensed under *vacuo* to afford the desired product (1.62 g, 95%) as a colorless oil without further purification.

**<sup>1</sup>H NMR** (400 MHz, CDCl<sub>3</sub>): δ [ppm] = 7.36–7.29 (m, 4 H), 7.26–7.21 (m, 1 H), 4.00 (dd, *J* = 9.0, 6.7 Hz, 1 H), 3.84–3.77 (m, 2 H), 3.69 (d, *J* = 14.1 Hz, 1 H), 3.52 (d, *J* = 14.1 Hz, 1 H), 3.50 (apparent td, *J* = 6.7, 4.9 Hz, 1 H), 3.28 (dd, *J* = 9.0, 6.7 Hz, 1 H), 3.02 (apparent dt, *J* = 7.4, 5.6 Hz, 1 H), 2.05 (s, 2 H), 1.25 (br, 2 H), 0.07 (s, 9 H); **<sup>13</sup>C NMR** (100 MHz, CDCl<sub>3</sub>): δ [ppm] = 140.0, 128.5, 128.4, 127.1, 75.3, 71.7, 67.8, 59.5, 53.5, 41.7, –1.3; **HRMS** (ESI): calculated for [C<sub>15</sub>H<sub>27</sub>N<sub>2</sub>OSi]<sup>+</sup>: *m/z* = 279.1887, found: *m/z* = 279.1887; **IR** (ν/cm<sup>–1</sup>, neat): 3368, 2951, 2853, 1602, 1494, 1453, 1247, 1052, 838, 738, 698.

(9) The reaction went through aziridinium intermediate.



## 2.6 Synthesis of SLAP reagent 13

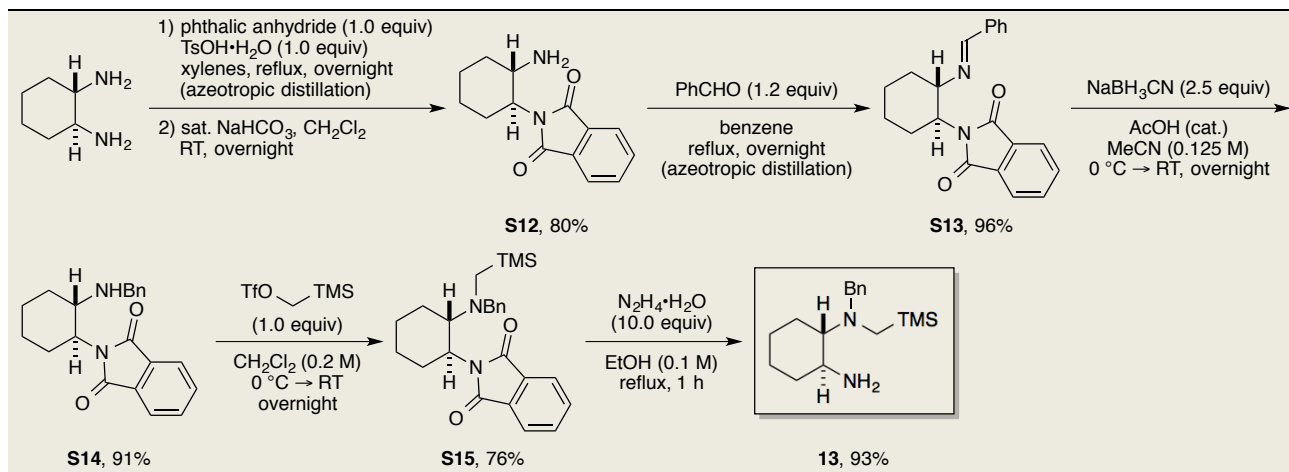2-(*trans*-2-Aminocyclohexyl)isoindoline-1,3-dione (**S12**)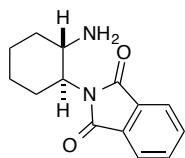

The procedure was modified from the literature.<sup>10</sup> A stirred suspension of *p*-TsOH·H<sub>2</sub>O (7.6 g, 40.0 mmol, 1.0 equiv) in xylenes (200 mL) was heated to reflux to remove water azeotropically (c.a. 1–2 h). The resulting solution was allowed to cool to room temperature, followed by the addition of *trans*-cyclohexane-1,2-diamine (4.6 g, 40.0 mmol, 1.0 equiv) and phthalic anhydride (5.9 g, 40.0 mmol, 1.0 equiv). The mixture was again heated to remove water azeotropically overnight and allowed to cool to room temperature. The monoprotected **S12**·*p*-TsOH was obtained by recrystallization from hexanes/xylenes (a white solid, 16.0 g, 96%). **S12**·*p*-TsOH was dissolved in CH<sub>2</sub>Cl<sub>2</sub> (100 mL) and stirred with sat. NaHCO<sub>3(aq)</sub> (100 mL) at room temperature overnight. After the organic layer was separated, the aqueous layer was extracted with CH<sub>2</sub>Cl<sub>2</sub> (3×100 mL). The combined organics were washed with brine, dried over Na<sub>2</sub>SO<sub>4</sub>, filtered, and condensed under *vacuo* to afford the desired product **S12** without further purification (a white solid, 7.8 g, 80% from diamine).

<sup>1</sup>H NMR (400 MHz, CDCl<sub>3</sub>): δ [ppm] = 7.82 (dd, *J* = 5.4, 3.1 Hz, 2 H), 7.69 (dd, *J* = 5.4, 3.1 Hz, 2 H), 3.79 (ddd, *J* = 12.4, 10.5, 3.9 Hz, 1 H), 3.41 (ddd, *J* = 11.3, 10.5, 4.1 Hz, 1 H), 2.19 (dddd, *J* = 12.6, 12.6, 12.4, 3.5 Hz, 1 H), 2.07–2.01 (m, 1 H), 1.84–1.73 (m, 1 H), 1.49–1.28 (m, 4 H), 1.19 (dddd, *J* = 12.8, 11.3, 3.6 Hz, 1 H); <sup>13</sup>C NMR (100 MHz, CDCl<sub>3</sub>): δ [ppm] = 168.9, 134.0, 132.1, 123.3, 58.7, 51.0, 36.8, 29.5, 25.8, 25.2.

2-(*trans*-2-(Benzylideneamino)cyclohexyl)isoindoline-1,3-dione (**S13**)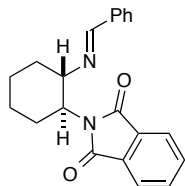

The procedure was followed by the literature.<sup>10a</sup> A solution of **S12** (9.77 g, 40.00 mmol, 1.00 equiv) and benzaldehyde (4.87 mL, 48.00 mmol, 1.20 equiv) in benzene (100 mL) with Dean–Stark apparatus overnight. The reaction was allowed to cool to room temperature and poured into hexanes. The desired product was obtained from the recrystallization as a white solid (12.79 g, 96%).

<sup>1</sup>H NMR (400 MHz, CDCl<sub>3</sub>): δ [ppm] = 7.63 (dd, *J* = 5.4, 3.1 Hz, 2 H), 7.50 (dd, *J* = 5.4, 3.1 Hz, 2 H), 7.47–7.45 (m, 2 H), 7.22–7.15 (m, 3 H), 4.33 (ddd, *J* = 12.7, 10.6, 3.8 Hz, 1 H), 3.96 (ddd, *J* = 10.6, 10.6, 4.3 Hz, 1 H), 2.17 (dddd, *J* = 12.7, 12.7, 11.8, 3.0 Hz, 1 H), 1.82–1.61 (m, 5 H), 1.49–1.35 (m, 2 H); <sup>13</sup>C NMR (100 MHz, CDCl<sub>3</sub>): δ [ppm] = 168.6, 160.9, 136.3, 133.8, 131.9, 130.6, 128.5, 128.2, 123.1, 69.5, 55.8, 34.3, 28.9, 25.7, 24.3.

(10) (a) Kaik, M.; Gawroński, J. *Tetrahedron: Asymmetry* **2003**, *14*, 1559–1563; (b) Bui, T.; Syed, S.; Barbas, C. F. *J. Am. Chem. Soc.* **2009**, *131*, 8758–8759.

**2-(trans-2-(Benzylamino)cyclohexyl)isoindoline-1,3-dione (S14)**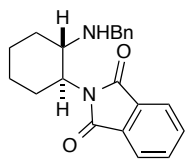

The procedure was modified from the literature.<sup>10a</sup> To a solution of imine **S13** (9.97 g, 30.00 mmol, 1.00 equiv) in dry MeCN (240 mL, 0.13 M) at 0 °C was added NaBH<sub>3</sub>CN (4.71 g, 75.00 mmol, 2.50 equiv) and AcOH (0.17 mL, 3.00 mmol, 0.10 equiv) sequentially. The reaction was allowed to warm to room temperature and stirred overnight.

After solvent was removed under *vacuo*, the residue was extracted with CH<sub>2</sub>Cl<sub>2</sub> and sat. NaHCO<sub>3(aq)</sub>. The combined organic extracts were washed with brine, dried over Na<sub>2</sub>SO<sub>4</sub>, filtered, and condensed under *vacuo*. The residue was purified by flash column chromatography to afford the desired product (9.14 g, 91%).

**<sup>1</sup>H NMR** (400 MHz, CDCl<sub>3</sub>): δ [ppm] = 7.80 (dd, *J* = 5.5, 3.0 Hz, 2 H), 7.70 (dd, *J* = 5.5, 3.0 Hz, 2 H), 7.10–7.04 (m, 5 H), 3.96 (ddd, *J* = 12.4, 11.0, 3.9 Hz, 1 H), 3.81 (d, *J* = 13.2 Hz, 1 H), 3.59 (d, *J* = 13.2 Hz, 1 H), 3.26 (td, *J* = 11.0, 4.1 Hz, 1 H), 2.31–2.20 (m, 2 H), 1.84–1.77 (m, 3 H), 1.45–1.29 (m, 2 H), 1.18–1.08 (m, 2 H); **<sup>13</sup>C NMR** (100 MHz, CDCl<sub>3</sub>): δ [ppm] = 168.9, 141.2, 133.8, 132.2, 128.2, 128.0, 126.7, 123.2, 56.5, 56.1, 50.7, 33.3, 29.6, 25.8, 25.2.

**2-(trans-2-(Benzyl((trimethylsilyl)methyl)amino)cyclohexyl)isoindoline-1,3-dione (S15)**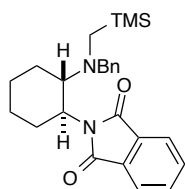

The procedure was modified from the literature.<sup>4</sup> To an ice-cooled solution of **S14** (3.00 g, 9.00 mmol, 1.00 equiv) in anhydrous CH<sub>2</sub>Cl<sub>2</sub> (45 mL, 0.20 M) under N<sub>2</sub> was slowly added (trimethylsilyl)methyl trifluoromethanesulfonate<sup>5</sup> (1.83 mL, 9.00 mmol, 1.00 equiv). The reaction was allowed to warm to room temperature and stirred overnight. After quenched by 5% NaOH<sub>(aq)</sub> (10 mL), the mixture was extracted by CH<sub>2</sub>Cl<sub>2</sub> (3×20 mL). The combined extracts were washed with brine, dried over Na<sub>2</sub>SO<sub>4</sub>, filtered, and condensed under *vacuo*.

The residue was purified by flash column chromatography to afford the desired product (2.88 g, 76%) as a white solid.

**m.p.**: 78–79 °C; **<sup>1</sup>H NMR** (400 MHz, CDCl<sub>3</sub>): δ [ppm] = 7.80–7.78 (m, 2 H), 7.73–7.70 (m, 2 H), 7.17–7.13 (m, 1 H), 7.09–7.05 (m, 2 H), 6.96–6.94 (m, 2 H), 4.20 (ddd, *J* = 12.1, 10.8, 3.9 Hz, 1 H), 3.74 (d, *J* = 13.6 Hz, 1 H), 3.25 (d, *J* = 13.6 Hz, 1 H), 3.25–3.20 (m, 1 H), 2.35–2.24 (m, 1 H), 2.13 (d, *J* = 14.2 Hz, 1 H), 2.06–2.02 (m, 1 H), 1.91 (d, *J* = 14.2 Hz, 1 H), 1.86–1.75 (m, 3 H), 1.36–1.24 (m, 3 H), –0.05 (s, 9 H); **<sup>13</sup>C NMR** (100 MHz, CDCl<sub>3</sub>): δ [ppm] = 168.5, 168.1, 140.2, 133.7, 132.7, 132.2, 128.6, 128.0, 126.7, 123.1, 122.8, 59.7, 57.0, 51.9, 40.9, 29.8, 26.0, 25.2, 22.5, –1.2; **HRMS** (ESI): calculated for [C<sub>25</sub>H<sub>33</sub>N<sub>2</sub>O<sub>2</sub>Si]<sup>+</sup>: *m/z* = 421.2306, found: *m/z* = 421.2307; **IR** (ν/cm<sup>–1</sup>, neat): 2933, 1767, 1708, 1389, 1246, 1076, 847, 718.

**trans-N<sup>1</sup>-Benzyl-N<sup>1</sup>-((trimethylsilyl)methyl)cyclohexane-1,2-diamine (13)**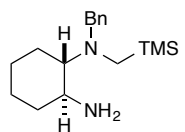

Hydrazine monohydrate (5.85 mL, 120.00 mmol, 10.00 equiv) was added to a solution of **S15** (5.05 g, 12.00 mmol, 1.00 equiv) in EtOH (120 mL, 0.10 M). The mixture was heated under reflux for 1 h and the white solids precipitated during the reaction. The reaction was cooled to room temperature and sufficient amount of 5% NaOH<sub>(aq)</sub> was added to dissolve the white precipitates. EtOH was removed under *vacuo* and the remained aqueous layer was extracted by CH<sub>2</sub>Cl<sub>2</sub> (3×50 mL). The combined extracts were washed with brine, dried over Na<sub>2</sub>SO<sub>4</sub>, filtered, and condensed under *vacuo* to afford the desired product (3.25 g, 93%) as a colorless oil without further purification.

**<sup>1</sup>H NMR** (400 MHz, CDCl<sub>3</sub>): δ [ppm] = 7.30 (d, *J* = 4.4 Hz, 4 H), 7.25–7.20 (m, 1 H), 3.83 (d, *J* = 13.6 Hz, 1 H), 3.27 (d, *J* = 13.6 Hz, 1 H), 2.60 (ddd, *J* = 10.4, 10.4, 4.2 Hz, 1 H), 2.12–2.04 (m, 1 H), 2.07 (d, *J* = 14.6 Hz, 1 H), 1.93 (d, *J* = 14.6 Hz, 1 H), 1.99–1.84 (m, 4 H), 1.81–1.76 (m, 1 H), 1.65–1.60 (m, 1 H), 1.25–1.07 (m, 3 H), 1.04–0.93 (m, 1 H), 0.06 (s, 9 H); **<sup>13</sup>C NMR** (100 MHz, CDCl<sub>3</sub>): δ [ppm] = 140.6, 128.8, 128.4, 126.8, 67.0, 56.9, 51.6, 41.1, 35.2, 25.8, 25.3, 21.0, –1.1; **HRMS** (ESI): calculated for [C<sub>17</sub>H<sub>31</sub>N<sub>2</sub>Si]<sup>+</sup>: *m/z* = 291.2251, found: *m/z* = 291.2250; **IR** (ν/cm<sup>–1</sup>, neat): 3359, 2928, 2856, 1585, 1450, 1364, 1248, 1070, 839, 740, 689.

## 2.7 Synthesis of SLAP reagent 14

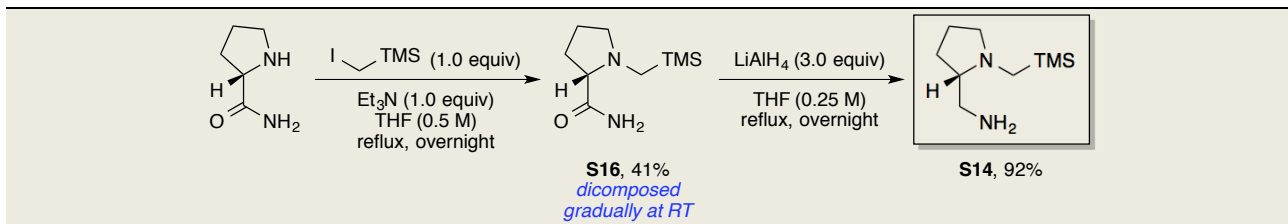**(S)-1-((Trimethylsilyl)methyl)pyrrolidine-2-carboxamide (S16)**

(S)-Pyrrolidine-2-carboxamide (2.28 g, 20.00 mmol, 1.00 equiv), (iodomethyl)trimethylsilane (2.97 mL, 20.00 mmol, 1.00 equiv), and Et<sub>3</sub>N (2.78 mL, 20.00 mmol, 1.00 equiv) were mixed in anhydrous THF (40 mL, 0.50 M) and heated to reflux under N<sub>2</sub> overnight. The reaction was cooled to room temperature and condensed under *vacuo*. The residue was purified by flash column chromatography to afford the desired product<sup>11</sup> (1.65 g, 41%) as a colorless oil.

$[\alpha]_D^{25}$  (c = 1.0, CHCl<sub>3</sub>) = -112.7; <sup>1</sup>H NMR (400 MHz, CDCl<sub>3</sub>): δ [ppm] = 7.08 (br, 1 H), 6.52 (br, 1 H), 3.13–3.08 (m, 1 H), 2.83 (dd, *J* = 10.1, 5.2 Hz, 1 H), 2.25–2.18 (m, 1 H), 2.24 (d, *J* = 14.2 Hz, 1 H), 2.19–2.08 (m, 1 H), 1.84 (d, *J* = 14.2 Hz, 1 H), 1.81–1.71 (m, 3 H), 0.02 (s, 9 H); <sup>13</sup>C NMR (100 MHz, CDCl<sub>3</sub>): δ [ppm] = 178.8, 72.3, 56.6, 47.3, 30.4, 24.8, -1.6; HRMS (ESI): calculated for [C<sub>9</sub>H<sub>21</sub>N<sub>2</sub>OSi]<sup>+</sup>: *m/z* = 201.1418, found: *m/z* = 201.1418; IR (ν/cm<sup>-1</sup>, neat): 3430, 3258, 2954, 2790, 1682, 1574, 1249, 1107, 853, 763, 693.

**(S)-1-((Trimethylsilyl)methyl)pyrrolidin-2-yl)methanamine (14)**

To an ice-cooled solution of **S16** (1.50 g, 7.50 mmol, 1.00 equiv) in anhydrous THF (30 mL, 0.25 M), LiAlH<sub>4</sub> (0.85 g, 22.50 mmol, 3.00 equiv) was added slowly and portionwise (CAUTION!<sup>7</sup>). After the addition was complete, the mixture was heated under reflux overnight. The reaction was cooled to room temperature and quenched with 20% NaOH<sub>(aq)</sub> before being filtered and washed with EtOAc. The combined filtrate was condensed under *vacuo*, and the desired product was obtained as colorless oil without further purification (1.28 g, 92%).

$[\alpha]_D^{25}$  (c = 1.0, CHCl<sub>3</sub>) = -83.3; <sup>1</sup>H NMR (400 MHz, CDCl<sub>3</sub>): δ [ppm] = 3.05 (ddd, *J* = 8.9, 4.4, 4.4 Hz, 1 H), 2.69 (dd, *J* = 13.0, 5.1 Hz, 1 H), 2.59 (dd, *J* = 13.0, 2.7 Hz, 1 H), 2.24 (d, *J* = 14.2 Hz, 1 H), 2.14 (dddd, *J* = 7.4, 5.1, 4.9, 2.7 Hz, 1 H), 2.07 (ddd, *J* = 8.9, 8.6, 8.6 Hz, 1H), 1.79–1.72 (m, 1 H), 1.69–1.53 (m, 3 H), 1.54 (d, *J* = 14.2 Hz, 1 H), 1.25 (br, 2 H), 0.01 (s, 9 H); <sup>13</sup>C NMR (100 MHz, CDCl<sub>3</sub>): δ [ppm] = 69.8, 57.3, 45.4, 43.4, 27.2, 23.3, -1.3; HRMS (ESI): calculated for [C<sub>9</sub>H<sub>23</sub>N<sub>2</sub>Si]<sup>+</sup>: *m/z* = 187.1625, found: *m/z* = 187.1627; IR (ν/cm<sup>-1</sup>, neat): 3369, 2953, 2777, 1582, 1461, 1418, 1248, 1113, 850, 762, 692.

(11) The product was found to decompose gradually at room temperature over a few weeks.

## 2.8 Synthesis of SLAP reagent 15

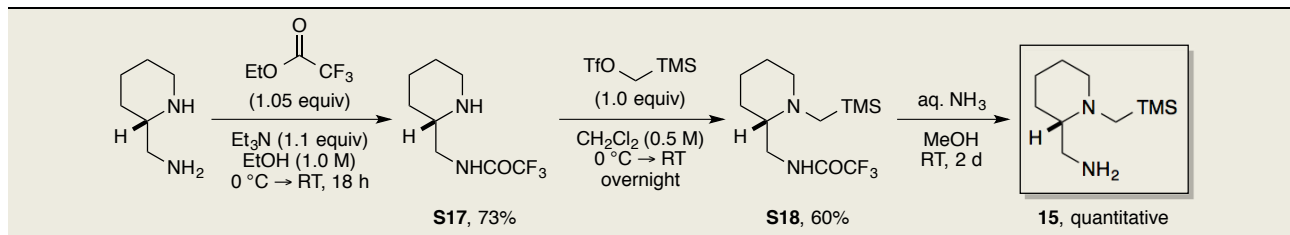

## 2,2,2-Trifluoro-N-(piperidin-2-ylmethyl)acetamide (S17)

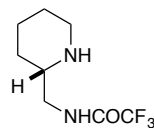

The procedure was modified from the literature.<sup>12</sup> To an ice-cooled solution of piperidin-2-ylmethanamine (3.64 mL, 30.00 mmol, 1.00 equiv) and Et<sub>3</sub>N (4.59 mL, 33.00 mmol, 1.10 equiv) in EtOH (30 mL, 1.00 M), ethyl 2,2,2-trifluoroacetate (3.75 mL, 31.50 mmol, 1.05 equiv) was added dropwise under N<sub>2</sub>. The reaction was allowed to warm to room temperature and stirred for 18 h. After the solvents were removed under *vacuo*, the residue was further recrystallized with Et<sub>2</sub>O/hexanes to afford the desired product (4.63 g, 73%) as a white solid.

<sup>1</sup>H NMR (400 MHz, CDCl<sub>3</sub>): δ [ppm] = 7.19 (br, 1 H), 3.40 (dd, *J* = 13.7, 4.2 Hz, 1 H), 3.16 (dd, *J* = 13.7, 7.5 Hz, 1 H), 3.07 (dddd, *J* = 12.4, 4.1, 2.1, 2.1 Hz, 1 H), 2.75 (dddd, *J* = 10.9, 7.5, 4.2, 2.8 Hz, 1 H), 2.65–2.59 (m, 1 H), 1.87–1.80 (m, 1 H), 1.83 (br, 1 H), 1.68–1.58 (m, 2 H), 1.47–1.29 (m, 2 H), 1.20–1.10 (m, 1 H); <sup>13</sup>C NMR (100 MHz, CDCl<sub>3</sub>): δ [ppm] = 157.6 (q, *J* = 36.8 Hz), 116.0 (q, *J* = 287.7 Hz), 55.0, 46.5, 45.0, 30.3, 26.5, 24.1; <sup>19</sup>F NMR (377 MHz, CDCl<sub>3</sub>): δ [ppm] = –75.8.

## 2,2,2-Trifluoro-N-((1-((trimethylsilyl)methyl)piperidin-2-yl)methyl)acetamide (S18)

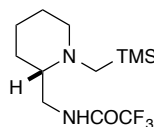

The procedure was modified from the literature.<sup>4</sup> To an ice-cooled solution of **S17** (3.15 g, 15.00 mmol, 1.00 equiv) in anhydrous CH<sub>2</sub>Cl<sub>2</sub> (30 mL, 0.50 M) under N<sub>2</sub> was slowly added (trimethylsilyl)methyl trifluoromethanesulfonate<sup>5</sup> (3.05 mL, 15.00 mmol, 1.00 equiv). The reaction was allowed to warm to room temperature and stirred overnight. After quenched by 5% NaOH<sub>(aq)</sub> (20 mL), the mixture was extracted by CH<sub>2</sub>Cl<sub>2</sub> (3×30 mL). The combined extracts were washed with brine, dried over Na<sub>2</sub>SO<sub>4</sub>, filtered, and condensed under *vacuo*. The residue was purified by flash column chromatography to afford the desired product (2.66 g, 60%) as a yellowish oil.

<sup>1</sup>H NMR (400 MHz, CDCl<sub>3</sub>): δ [ppm] = 7.19 (br, 1 H), 3.48 (dd, *J* = 13.9, 4.8 Hz, 1 H), 3.29 (dd, *J* = 13.9, 3.2 Hz, 1 H), 2.95 (ddd, *J* = 12.0, 3.8, 3.8 Hz, 1 H), 2.30–2.25 (m, 1 H), 2.21 (d, *J* = 14.3 Hz, 1 H), 2.10 (ddd, *J* = 12.0, 10.8, 2.7 Hz, 1 H), 1.72–1.67 (m, 1 H), 1.63 (d, *J* = 14.3 Hz, 1 H), 1.62–1.57 (m, 2 H), 1.47–1.27 (m, 3 H), 0.05 (s, 9 H); <sup>13</sup>C NMR (100 MHz, CDCl<sub>3</sub>): δ [ppm] = 157.6 (q, *J* = 37.1 Hz), 116.1 (q, *J* = 287.8 Hz), 60.9, 54.8, 44.7, 41.6, 28.5, 24.7, 23.6, –1.2; <sup>19</sup>F NMR (377 MHz, CDCl<sub>3</sub>): δ [ppm] = –75.9; HRMS (ESI): calculated for [C<sub>12</sub>H<sub>24</sub>F<sub>3</sub>N<sub>2</sub>OSi]<sup>+</sup>: *m/z* = 297.1605, found: *m/z* = 297.1607; IR (ν/cm<sup>–1</sup>, neat): 3341, 2939, 2859, 2788, 1727, 1525, 1250, 1165, 1065, 861, 702.

## (1-((Trimethylsilyl)methyl)piperidin-2-yl)methanamine (15)

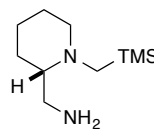

To a solution of **S18** (2.4 g, 8.1 mmol, 1.0 equiv) in MeOH (20 mL, 0.4 M), *ca.* 25% NH<sub>3(aq)</sub> (20 mL, 131.3 mmol, 16.2 equiv) was added. The mixture was stirred at room temperature for 2 days before the solvents were removed under *vacuo*. The residue was extracted with CH<sub>2</sub>Cl<sub>2</sub> and sat. NaHCO<sub>3(aq)</sub>. The combined extracts were washed with brine, dried over Na<sub>2</sub>SO<sub>4</sub>, filtered, and condensed under *vacuo* to afford the desired product (1.6 g, quantitative) as a colorless oil without further purification.

<sup>1</sup>H NMR (400 MHz, CDCl<sub>3</sub>): δ [ppm] = 2.93–2.88 (m, 2 H), 2.61 (dd, *J* = 13.3, 3.4 Hz, 1 H), 2.32 (d, *J* = 14.4 Hz, 1 H), 2.09 (ddd, *J* = 12.1, 11.4, 3.3 Hz, 1 H), 2.09 (ddd, *J* = 11.7, 11.4, 3.1 Hz, 1 H), 2.02–1.96 (m,

3 H), 1.70–1.64 (m, 1 H), 1.62 (d,  $J = 14.4$  Hz, 1 H), 1.56–1.43 (m, 4 H), 1.32–1.21 (m, 1 H), 0.03 (s, 9 H);  **$^{13}\text{C}$  NMR** (100 MHz,  $\text{CDCl}_3$ ):  $\delta$  [ppm] = 65.6, 55.7, 44.7, 43.6, 28.0, 25.1, 24.0,  $-0.9$ ; **HRMS** (ESI): calculated for  $[\text{C}_{10}\text{H}_{25}\text{N}_2\text{Si}]^+$ :  $m/z = 201.1782$ , found:  $m/z = 201.1783$ ; **IR** ( $\text{v}/\text{cm}^{-1}$ , neat): 3369, 2933, 2857, 2778, 1683, 1582, 1462, 1248, 1201, 1130, 838, 692.

## 3. Photocatalytic synthesis of piperazines with SLAP reagents

## 3.1 Optimized conditions for cyclization

Table S1. Screening of cyclization conditions

4                      5                      6                      desired product

Pg = Boc, **7**  
Ph, **8**  
Bn, **9a**

| entry | imine <sup>a</sup> | condition                                                                                                   | result                                            |
|-------|--------------------|-------------------------------------------------------------------------------------------------------------|---------------------------------------------------|
| 1     | <b>4</b>           | Cu(OTf) <sub>2</sub> (1.0 equiv), 2,6-lutidine (1.0 equiv), 1,2-dichloroethane/HFIP (1:1, 0.10 M), RT, 16 h | imine recovered                                   |
| 2     | <b>4</b>           | Ir[(ppy) <sub>2</sub> dtbbpy]PF <sub>6</sub> (1 mol %), MeCN (0.05 M), blue light, RT, 16 h                 | imine recovered                                   |
| 3     | <b>5</b>           | Ir[(ppy) <sub>2</sub> dtbbpy]PF <sub>6</sub> (1 mol %), MeCN (0.05 M), blue light, RT, 3 h                  | <b>8</b> , 73% <sup>b</sup>                       |
| 4     | <b>6</b>           | Ir[(ppy) <sub>2</sub> dtbbpy]PF <sub>6</sub> (1 mol %), MeCN (0.05 M), blue light, RT, 3 h                  | <b>9a</b> , N.D. <sup>b</sup> (59% <sup>c</sup> ) |
| 5     | <b>6</b>           | Ir[(ppy) <sub>2</sub> dtbbpy]PF <sub>6</sub> (1 mol %), MeCN/MeOH (9:1, 0.05 M), blue light, RT, 3 h        | <b>9a</b> , 62% <sup>b</sup> (67% <sup>c</sup> )  |
| 6     | <b>6</b>           | Ir[(ppy) <sub>2</sub> dtbbpy]PF <sub>6</sub> (1 mol %), MeCN/HFIP (9:1, 0.05 M), blue light, RT, 3 h        | <b>9a</b> , 67% <sup>b</sup> (71% <sup>c</sup> )  |
| 7     | <b>6</b>           | Ir[(ppy) <sub>2</sub> dtbbpy]PF <sub>6</sub> (1 mol %), MeCN/TFE (9:1, 0.05 M), blue light, RT, 3 h         | <b>9a</b> , 70% <sup>b</sup>                      |
| 8     | <b>6</b>           | No catalyst, MeCN (0.05 M), blue light, RT, 3 h                                                             | imine recovered                                   |
| 9     | <b>6</b>           | Ir[(ppy) <sub>2</sub> dtbbpy]PF <sub>6</sub> (1 mol %), MeCN (0.05 M), dark, RT, 3 h                        | imine recovered                                   |
| 10    | <b>6</b>           | Ir(ppy) <sub>3</sub> (1 mol %), MeCN (0.05 M), blue light, RT, 3 h                                          | imine recovered + unidentified products           |
| 11    | <b>6</b>           | Ru(bpy) <sub>3</sub> Cl <sub>2</sub> ·6H <sub>2</sub> O (1 mol %), MeCN (0.05 M), blue light, RT, 3 h       | fully desilylated unidentified products           |
| 12    | <b>6</b>           | Mes-Acr-Me (5 mol %), MeCN (0.05 M), blue light, RT, 3 h                                                    | imine recovered                                   |
| 13    | <b>6</b>           | Mes-Acr-Ph (5 mol %), MeCN (0.05 M), blue light, RT, 3 h                                                    | imine recovered                                   |
| 14    | <b>6</b>           | Ir[(ppy) <sub>2</sub> dtbbpy]PF <sub>6</sub> (1 mol %), MeOH (0.05 M), blue light, RT, 3 h                  | <b>9a</b> , N.D. <sup>b</sup> (55% <sup>c</sup> ) |
| 15    | <b>6</b>           | Ir[(ppy) <sub>2</sub> dtbbpy]PF <sub>6</sub> (1 mol %), HFIP (0.05 M), blue light, RT, 3 h                  | imine recovered + trace of hydrolysis             |

<sup>a</sup>Imine formation was performed with *p*-fluorobenzaldehyde and MS 4A in MeCN. <sup>b</sup>Isolated yield under 0.5 mmol scale. <sup>c</sup>Calculated yield from crude <sup>1</sup>H NMR spectrum under 0.1 mmol scale with 1,3,5-trimethoxybenzene as an internal standard. N.D. = not determined.

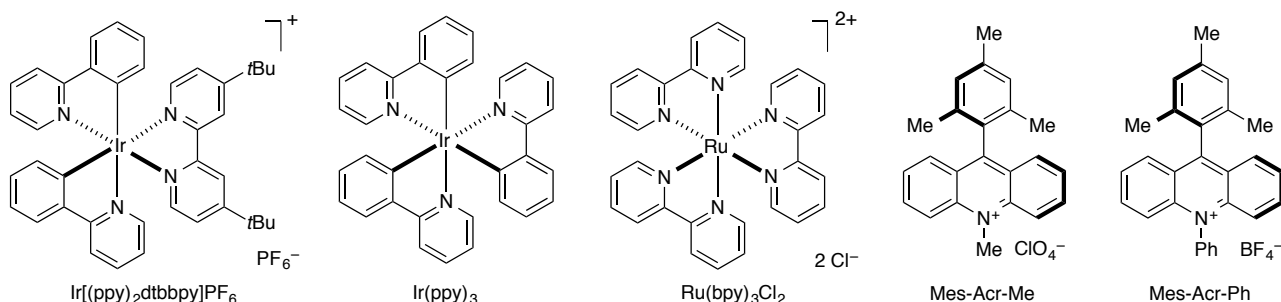

**3-(4-Fluorophenyl)-1-phenylpiperazine (8) (Table 1, entry 3)**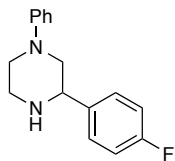

A mixture of the **2** (112.2 mg, 0.5 mmol, 1.0 equiv) and 4-fluorobenzaldehyde (53.6  $\mu$ L, 0.5 mmol, 1.0 equiv), and MS 4A (100.0 mg) in MeCN (1.0 mL, 0.5 M) under N<sub>2</sub> was stirred overnight at room temperature. The reaction was filtered through Celite and washed with CH<sub>2</sub>Cl<sub>2</sub>. The filtrate was condensed under *vacuo* and the residue was re-dissolved in MeCN (10 mL, 0.05 M) in a vial (20 mL), followed by the addition of Ir[(ppy)<sub>2</sub>dtbbpy]PF<sub>6</sub><sup>13</sup> (4.6 mg, 5.0  $\mu$ mol, 0.01 equiv). The reaction was stirred at room temperature under the exposure of blue LEDs with a cooling fan to maintain the temperature. H<sub>2</sub>O (0.1 mL) was added and the reaction was stirred for another 5 min. After the solvents were removed under *vacuo*, the residue was dissolved in CH<sub>2</sub>Cl<sub>2</sub>, dried over Na<sub>2</sub>SO<sub>4</sub>, filtered, and condensed under *vacuo*. The residue was purified by flash column chromatography (CH<sub>2</sub>Cl<sub>2</sub> to 5% MeOH in CH<sub>2</sub>Cl<sub>2</sub>) to afford the desired product (93.9 mg, 73%) as a yellowish oil.

<sup>1</sup>H NMR (400 MHz, CDCl<sub>3</sub>):  $\delta$  [ppm] = 7.47 (ddd, *J* = 8.5, 5.3, 2.6 Hz, 2 H), 7.33–7.28 (m, 2 H), 7.11–7.07 (m, 2 H), 7.00–6.97 (m, 2 H), 6.91 (tt, *J* = 7.2, 1.0 Hz, 1 H), 4.01 (dd, *J* = 10.4, 2.9 Hz, 1 H), 3.67–3.62 (m, 2 H), 3.27 (ddd, *J* = 11.4, 3.5, 2.2 Hz, 1 H), 3.19 (td, *J* = 11.4, 3.0 Hz, 1 H), 2.94 (td, *J* = 11.4, 3.5 Hz, 1 H), 2.74 (dd, *J* = 11.8, 10.4 Hz, 1 H), 2.41 (br, 1 H); <sup>13</sup>C NMR (100 MHz, CDCl<sub>3</sub>):  $\delta$  [ppm] = 162.3 (d, *J* = 245.8 Hz), 151.3, 137.8 (d, *J* = 3.1 Hz), 129.2, 128.8 (d, *J* = 7.9 Hz), 119.9, 116.3, 115.4 (d, *J* = 21.2 Hz), 59.8, 57.1 (d, *J* = 1.4 Hz), 49.4, 46.2; <sup>19</sup>F NMR (377 MHz, CDCl<sub>3</sub>):  $\delta$  [ppm] = –114.6; HRMS (ESI): calculated for [C<sub>16</sub>H<sub>18</sub>FN<sub>2</sub>]<sup>+</sup>: *m/z* = 257.1449, found: *m/z* = 257.1448; IR (v/cm<sup>–1</sup>, neat): 3037, 2947, 2821, 1671, 1600, 1508, 1449, 1333, 1234, 1141, 964, 837, 759, 693.

**1-Benzyl-3-(4-fluorophenyl)piperazine (9a) (Table 1, entry 5–7)**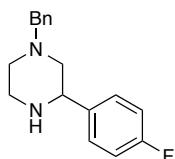

A mixture of the **3** (118.2 mg, 0.5 mmol, 1.0 equiv) and 4-fluorobenzaldehyde (53.6  $\mu$ L, 0.5 mmol, 1.0 equiv), and MS 4A (100.0 mg) in MeCN (1.0 mL, 0.5 M) under N<sub>2</sub> was stirred overnight at room temperature. The reaction was filtered through Celite and washed with CH<sub>2</sub>Cl<sub>2</sub>. The filtrate was condensed under *vacuo* and the residue was re-dissolved in MeCN/MeOH (9:1, 10 mL, 0.05 M) in a vial (20 mL), followed by the addition of Ir[(ppy)<sub>2</sub>dtbbpy]PF<sub>6</sub><sup>13</sup> (4.6 mg, 5.0  $\mu$ mol, 0.01 equiv). The reaction was stirred at room temperature under the exposure of blue LEDs with a cooling fan to maintain the temperature. H<sub>2</sub>O (0.1 mL) was added and the reaction was stirred for another 5 min. After the solvents were removed under *vacuo*, the residue was dissolved in CH<sub>2</sub>Cl<sub>2</sub>, dried over Na<sub>2</sub>SO<sub>4</sub>, filtered, and condensed under *vacuo*. The residue was purified by flash column chromatography (CH<sub>2</sub>Cl<sub>2</sub> to 5% MeOH in CH<sub>2</sub>Cl<sub>2</sub>) to afford the desired product (83.7 mg, 62%) as a yellowish oil. (Entry 5)

- The photocatalytic reaction was conducted under MeCN/HFIP (9:1, 10 mL, 0.05 M) for 3 h at room temperature. The desired product was obtained by flash column chromatography (90.7 mg, 67%). (Entry 6)
- The photocatalytic reaction was conducted under MeCN/TFE (9:1, 10 mL, 0.05 M) for 3 h at room temperature. The desired product was obtained by flash column chromatography (94.2 mg, 70%). (Entry 7)

<sup>1</sup>H NMR (400 MHz, CDCl<sub>3</sub>):  $\delta$  [ppm] = 7.39–7.33 (m, 6 H), 7.30–7.27 (m, 1 H), 7.04–6.99 (m, 2 H), 3.90 (dd, *J* = 10.2, 2.8 Hz, 1 H), 3.57 (s, 2 H), 3.12–3.04 (m, 2 H), 2.93–2.84 (m, 2 H), 2.22 (ddd, *J* = 11.0, 9.7, 4.8 Hz, 1 H), 2.21 (br, 1 H), 2.07 (t, *J* = 10.2 Hz, 1 H); <sup>13</sup>C NMR (100 MHz, CDCl<sub>3</sub>):  $\delta$  [ppm] = 162.1 (d, *J* = 245.2 Hz), 138.5 (d, *J* = 3.1 Hz), 138.0, 129.3, 128.6 (d, *J* = 7.9 Hz), 128.3, 127.1, 115.2 (d, *J* = 21.1 Hz), 63.3, 61.4 (d, *J* = 1.2 Hz), 59.7, 53.2, 46.2; <sup>19</sup>F NMR (377 MHz, CDCl<sub>3</sub>):  $\delta$  [ppm] = –115.2; HRMS (ESI): calculated for [C<sub>17</sub>H<sub>20</sub>FN<sub>2</sub>]<sup>+</sup>: *m/z* = 271.1605, found: *m/z* = 271.1608; IR (v/cm<sup>–1</sup>, neat): 3262, 2939, 2806, 1604, 1509, 1453, 1318, 1223, 1133, 1026, 836, 699.

(13) (a) The iridium photocatalyst can be purchased from Sigma-Aldrich or prepared according to the literature: Ladouceur, S.; Fortin, D.; Zysman-Colman, E. *Inorg. Chem.* **2011**, *50*, 11514–11526; (b) Abbreviations: dtbbpy = 4,4'-di-*tert*-butyl-2,2'-bipyridine; ppy = 2-phenylpyridine.

## 3.2 General procedure

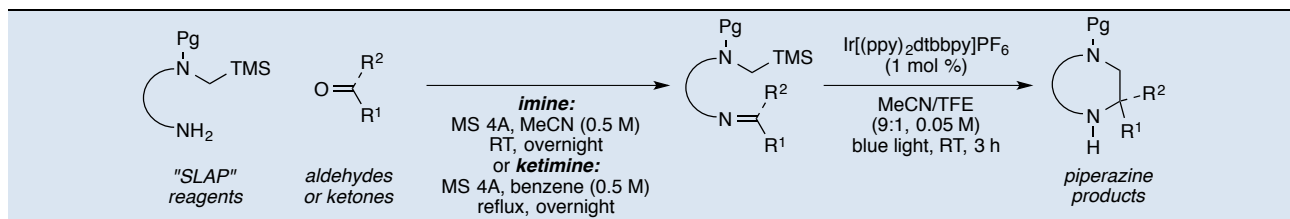

\* Protecting groups (Pg) can be alkyl or aryl substituents.

*General condition for imine formation:*

A mixture of a SLAP reagent (0.5 mmol), an aldehyde (0.5 mmol), and MS 4A (100.0 mg) in MeCN (1.0 mL, 0.5 M) under N<sub>2</sub> was stirred at room temperature overnight.<sup>14</sup> The reaction was filtered through Celite and washed with CH<sub>2</sub>Cl<sub>2</sub>. The filtrate was condensed under *vacuo* and used directly for cyclization.

*General condition for ketimine formation:*

A mixture of a SLAP reagent (0.5 mmol), a ketone (0.5 mmol), and MS 4A (100.0 mg) in benzene (1.0 mL, 0.5 M) under N<sub>2</sub> was stirred at reflux overnight. The reaction was filtered through Celite and washed with CH<sub>2</sub>Cl<sub>2</sub>. The filtrate was condensed under *vacuo* and used directly for cyclization.

*General condition for photocatalytic cyclization:*

The reaction was carried out in a closed vial (20 mL) with no need to be degassed beforehand or under dry conditions. To a solution of the corresponding imine or ketimine (0.5 mmol, 1.00 equiv) in MeCN/TFE (9:1, 10.0 mL, 0.05 M), Ir[(ppy)<sub>2</sub>dtbbpy]PF<sub>6</sub><sup>13</sup> (4.6 mg, 5.0 μmol, 0.01 equiv) was added. The reaction was stirred at room temperature under the exposure of blue LEDs (30 W) with a cooling fan to maintain the temperature. H<sub>2</sub>O (0.1 mL) was added and the reaction was stirred for another 5 min. After the solvents were removed under *vacuo*, the residue was dissolved in CH<sub>2</sub>Cl<sub>2</sub>, dried over Na<sub>2</sub>SO<sub>4</sub>, filtered, and condensed under *vacuo*. The residue was purified by flash column chromatography to afford the desired piperazine product.

(14) If necessary, reaction time for imine formation can be shortened to 2–4 h.



### 3.3 Substrate scope

#### Methyl 3-(4-benzylpiperazin-2-yl)benzoate (9b) (Scheme 2)

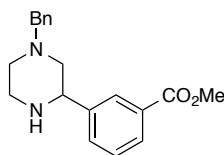

The photocatalytic synthesis of **9b** followed the general procedure with **3** (118.2 mg, 0.5 mmol, 1.0 equiv) and methyl 3-formylbenzoate (82.1 mg, 0.5 mmol, 1.0 equiv). The desired product was obtained by flash column chromatography (CH<sub>2</sub>Cl<sub>2</sub> to 5% MeOH in CH<sub>2</sub>Cl<sub>2</sub>) as a yellowish oil (102.1 mg, 66%).

**<sup>1</sup>H NMR** (400 MHz, CDCl<sub>3</sub>): δ [ppm] = 8.08 (t, *J* = 1.6 Hz, 1 H), 7.95 (dt, *J* = 7.8, 1.6 Hz, 1 H), 7.61 (dt, *J* = 7.7, 1.6 Hz, 1 H), 7.39 (apparent t, *J* = 7.8 Hz, 1 H), 7.36–7.24 (m, 5 H), 3.97 (dd, *J* = 10.2, 2.9 Hz, 1 H), 3.91 (s, 3 H), 3.56 (s, 2 H), 3.13–3.03 (m, 2 H), 2.93–2.84 (m, 2 H), 2.69 (br, 1 H), 2.25 (td, *J* = 10.7, 4.2 Hz, 1 H), 2.12 (dd, *J* = 11.0, 10.2 Hz, 1 H); **<sup>13</sup>C NMR** (100 MHz, CDCl<sub>3</sub>): δ [ppm] = 167.0, 142.7, 137.8, 131.8, 130.3, 129.2, 128.8, 128.5, 128.30, 128.27, 127.2, 77.2, 63.3, 60.9, 60.0, 53.0, 52.1, 46.0; **HRMS** (ESI): calculated for [C<sub>19</sub>H<sub>23</sub>N<sub>2</sub>O<sub>2</sub>]<sup>+</sup>: *m/z* = 311.1754, found: *m/z* = 311.1755; **IR** (v/cm<sup>-1</sup>, neat): 3327, 3028, 2948, 2807, 1715, 1673, 1435, 1287, 1204, 1105, 1027, 1001, 818, 737.

#### 1-Benzyl-3-(*o*-tolyl)piperazine (9c) (Scheme 2)

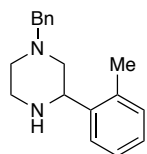

The photocatalytic synthesis of **9c** followed the general procedure with **3** (118.2 mg, 0.5 mmol, 1.0 equiv) and 2-methylbenzaldehyde (57.8 μL, 0.5 mmol, 1.0 equiv). The desired product was obtained by flash column chromatography (CH<sub>2</sub>Cl<sub>2</sub> to 5% MeOH in CH<sub>2</sub>Cl<sub>2</sub>) as a yellowish oil (73.6 mg, 55%).

**<sup>1</sup>H NMR** (400 MHz, CDCl<sub>3</sub>): δ [ppm] = 7.56 (d, *J* = 7.6 Hz, 1 H), 7.37–7.31 (m, 4 H), 7.28–7.24 (m, 1 H), 7.22–7.12 (m, 3 H), 4.13 (dd, *J* = 10.0, 2.6 Hz, 1 H), 3.60 (d, *J* = 13.1 Hz, 1 H), 3.55 (d, *J* = 13.1 Hz, 1 H), 3.13–3.10 (m, 2 H), 2.91–2.86 (m, 2 H), 2.48 (br, 1 H), 2.35 (s, 3 H), 2.26 (ddd, *J* = 11.2, 9.2, 5.4 Hz, 1 H), 2.03 (dd, *J* = 11.2, 10.0 Hz, 1 H); **<sup>13</sup>C NMR** (100 MHz, CDCl<sub>3</sub>): δ [ppm] = 140.3, 138.0, 135.4, 130.4, 129.3, 128.3, 127.12, 127.11, 126.3, 126.2, 63.3, 59.9, 56.4, 53.3, 46.4, 19.3; **HRMS** (ESI): calculated for [C<sub>18</sub>H<sub>23</sub>N<sub>2</sub>]<sup>+</sup>: *m/z* = 267.1856, found: *m/z* = 267.1858; **IR** (v/cm<sup>-1</sup>, neat): 3322, 3026, 2938, 2804, 1493, 1453, 1316, 1133, 1101, 1025, 756, 699.

#### 1-Benzyl-3-(3-methoxyphenyl)piperazine (9d) (Scheme 2)

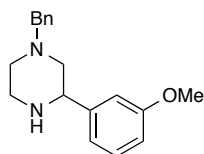

The photocatalytic synthesis of **9d** followed the general procedure with **3** (118.2 mg, 0.5 mmol, 1.0 equiv) and 3-methoxybenzaldehyde (60.8 μL, 0.5 mmol, 1.0 equiv). The desired product was obtained by flash column chromatography (CH<sub>2</sub>Cl<sub>2</sub> to 5% MeOH in CH<sub>2</sub>Cl<sub>2</sub>) as a yellowish oil (98.9 mg, 70%).

**<sup>1</sup>H NMR** (400 MHz, CDCl<sub>3</sub>): δ [ppm] = 7.38–7.32 (m, 4 H), 7.30–7.23 (m, 2 H), 7.01–6.98 (m, 2 H), 6.83 (ddd, *J* = 8.2, 2.5, 1.2 Hz, 1 H), 3.92 (dd, *J* = 10.5, 2.8 Hz, 1 H), 3.82 (s, 3 H), 3.58 (s, 2 H), 3.13–3.04 (m, 2 H), 2.95 (ddd, *J* = 11.0, 2.8, 1.7 Hz, 1 H), 2.87 (ddd, *J* = 10.7, 2.3, 2.3 Hz, 1 H), 2.55 (br, 1 H), 2.24 (ddd, *J* = 10.7, 10.7, 4.2 Hz, 1 H), 2.13 (dd, *J* = 10.5, 10.5 Hz, 1 H); **<sup>13</sup>C NMR** (100 MHz, CDCl<sub>3</sub>): δ [ppm] = 159.7, 144.1, 138.0, 129.4, 129.3, 128.3, 127.1, 119.5, 113.1, 112.5, 63.3, 61.1, 60.4, 55.3, 53.1, 46.2; **HRMS** (ESI): calculated for [C<sub>18</sub>H<sub>23</sub>N<sub>2</sub>O]<sup>+</sup>: *m/z* = 283.1805, found: *m/z* = 283.1803; **IR** (v/cm<sup>-1</sup>, neat): 3324, 2939, 2806, 1673, 1585, 1454, 1317, 1250, 1131, 1048, 910, 740, 699.

#### 1-Benzyl-3-cyclopropylpiperazine (9e) (Scheme 2)

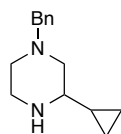

The photocatalytic synthesis of **9e** followed the general procedure with **3** (118.2 mg, 0.5 mmol, 1.0 equiv) and cyclopropanecarboxaldehyde (37.4 μL, 0.5 mmol, 1.0 equiv). The desired product was obtained by flash column chromatography (CH<sub>2</sub>Cl<sub>2</sub> to 10% MeOH in CH<sub>2</sub>Cl<sub>2</sub>) as a yellowish oil (49.9 mg, 46%).

**<sup>1</sup>H NMR** (400 MHz, CDCl<sub>3</sub>): δ [ppm] = 8.13 (br, 1 H), 7.35–7.25 (m, 5 H), 3.61 (d, *J* = 13.1 Hz, 1 H), 3.54 (d, *J* = 13.1 Hz, 1 H), 3.35 (ddd, *J* = 12.4, 2.9, 2.9 Hz, 1 H), 3.06–2.99 (m, 2 H), 2.83 (dd, *J* = 12.4, 1.9 Hz, 1 H), 2.60 (ddd, *J* = 11.9, 11.8, 2.9 Hz, 1 H), 2.53 (dd, *J* = 12.1, 10.0 Hz, 1 H), 2.38 (ddd, *J* = 10.0, 9.7, 3.1 Hz,

1 H), 1.19 (apparent dddd,  $J = 12.9, 9.7, 8.1, 4.8$  Hz, 1 H), 0.76 (dddd,  $J = 9.6, 5.1, 5.1, 4.9$  Hz, 1 H), 0.69–0.56 (m, 2 H), 0.28 (dddd,  $J = 10.2, 4.9, 4.7, 4.7$  Hz, 1 H);  $^{13}\text{C}$  NMR (100 MHz,  $\text{CDCl}_3$ ):  $\delta$  [ppm] = 137.3, 129.0, 128.5, 127.5, 62.4, 61.0, 55.7, 49.4, 43.9, 11.8, 4.1, 3.9; HRMS (ESI): calculated for  $[\text{C}_{14}\text{H}_{21}\text{N}_2]^+$ :  $m/z = 217.1699$ , found:  $m/z = 217.1699$ ; IR ( $\text{v}/\text{cm}^{-1}$ , neat): 3399, 2927, 2810, 2714, 2482, 1590, 1453, 1314, 1055, 1015, 741, 700.

### 1-Benzyl-3-isobutylpiperazine (9f) (Scheme 2)

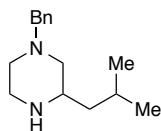

The photocatalytic synthesis of **9f** followed the general procedure with **3** (118.2 mg, 0.5 mmol, 1.0 equiv) and 3-methylbutanal (54.1  $\mu\text{L}$ , 0.5 mmol, 1.0 equiv). The desired product was obtained by flash column chromatography ( $\text{CH}_2\text{Cl}_2$  to 10% MeOH in  $\text{CH}_2\text{Cl}_2$ ) as a yellowish oil (36.0 mg, 37%).

$^1\text{H}$  NMR (400 MHz,  $\text{CDCl}_3$ ):  $\delta$  [ppm] = 7.30–7.27 (m, 4 H), 7.25–7.21 (m, 1 H), 4.43 (br, 1 H), 3.49 (apparent q,  $J = 13.0$  Hz, 2 H), 3.03 (apparent dt,  $J = 12.1, 2.9$  Hz, 1 H), 2.94–2.87 (m, 2 H), 2.81–2.73 (m, 2 H), 2.15 (apparent td,  $J = 11.3, 3.2$  Hz, 1 H), 1.85 (dd,  $J = 11.3, 9.9$  Hz, 1 H), 1.66 (apparent dh,  $J = 7.8, 6.6$  Hz, 1 H), 1.36 (apparent dt,  $J = 14.0, 7.1$  Hz, 1 H), 1.23 (ddd,  $J = 14.0, 7.8, 6.3$  Hz, 1 H), 0.88 (d,  $J = 2.6$  Hz, 3 H), 0.86 (d,  $J = 2.6$  Hz, 3 H);  $^{13}\text{C}$  NMR (100 MHz,  $\text{CDCl}_3$ ):  $\delta$  [ppm] = 137.9, 129.2, 128.3, 127.2, 63.3, 59.2, 53.2, 52.8, 45.3, 42.7, 24.3, 23.0, 22.6; HRMS (ESI): calculated for  $[\text{C}_{15}\text{H}_{25}\text{N}_2]^+$ :  $m/z = 233.2012$ , found:  $m/z = 233.2018$ ; IR ( $\text{v}/\text{cm}^{-1}$ , neat): 3398, 2957, 2822, 2718, 2482, 1590, 1454, 1368, 1318, 1140, 922, 736, 700.

### 4-Benzyl-9-oxa-1,4-diazaspiro[5.5]undecane (9g) (Scheme 2)

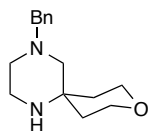

The photocatalytic synthesis of **9g** followed the general procedure with **3** (118.2 mg, 0.5 mmol, 1.0 equiv) and dihydro-2H-pyran-4(3H)-one (46.2  $\mu\text{L}$ , 0.5 mmol, 1.0 equiv). The photocatalytic cyclization was carried out in MeCN/MeOH (9:1, 10.0 mL, 0.05 M). The desired product was obtained by flash column chromatography ( $\text{CH}_2\text{Cl}_2$  to 10% MeOH in  $\text{CH}_2\text{Cl}_2$ ) as a yellowish oil (41.1 mg, 33%).

$^1\text{H}$  NMR (400 MHz,  $\text{CDCl}_3$ ):  $\delta$  [ppm] = 7.35–7.26 (m, 5 H), 6.47 (br, 1 H), 3.83 (dt,  $J = 12.0, 4.9$  Hz, 2 H), 3.53 (s, 2 H), 3.41 (dt,  $J = 12.0, 6.0$  Hz, 2 H), 3.11 (apparent t,  $J = 5.2$  Hz, 2 H), 2.65 (dd,  $J = 6.8, 3.8$  Hz, 2 H), 2.50 (apparent br, 2 H), 1.93 (apparent t,  $J = 5.5$  Hz, 4 H);  $^{13}\text{C}$  NMR (100 MHz,  $\text{CDCl}_3$ ):  $\delta$  [ppm] = 137.9, 128.8, 128.5, 127.4, 63.3, 62.6, 58.9, 52.7, 52.5, 39.9, 33.6; HRMS (ESI): calculated for  $[\text{C}_{15}\text{H}_{23}\text{N}_2\text{O}]^+$ :  $m/z = 247.1805$ , found:  $m/z = 247.1805$ ; IR ( $\text{v}/\text{cm}^{-1}$ , neat): 3397, 2947, 2851, 2809, 2488, 1587, 1454, 1363, 1239, 1152, 1107, 1029, 912, 850, 736, 700.

### 1-Benzyl-3-(pyridin-2-yl)piperazine (9h) (Scheme 2)

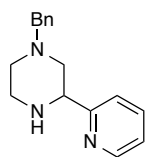

The photocatalytic synthesis of **9h** followed the general procedure with **3** (118.2 mg, 0.5 mmol, 1.0 equiv) and pyridine-2-carbaldehyde (47.8  $\mu\text{L}$ , 0.5 mmol, 1.0 equiv). The desired product was obtained by flash column chromatography ( $\text{CH}_2\text{Cl}_2$  to 10% MeOH in  $\text{CH}_2\text{Cl}_2$ ) as a yellowish oil (81.5 mg, 64%).

$^1\text{H}$  NMR (400 MHz,  $\text{CDCl}_3$ ):  $\delta$  [ppm] = 8.51 (ddd,  $J = 4.9, 1.3, 1.2$  Hz, 1 H), 7.60 (ddd,  $J = 7.7, 7.5, 1.8$  Hz, 1 H), 7.34–7.20 (m, 6 H), 7.13 (ddd,  $J = 7.5, 4.9, 1.1$  Hz, 1 H), 4.50 (br, 1 H), 4.09 (dd,  $J = 10.1, 3.0$  Hz, 1 H), 3.54 (s, 2 H), 3.14 (ddd,  $J = 12.3, 2.9, 2.9$  Hz, 1 H), 3.09–3.02 (m, 2 H), 2.84–2.79 (m, 1 H), 2.28–2.20 (m, 2 H);  $^{13}\text{C}$  NMR (100 MHz,  $\text{CDCl}_3$ ):  $\delta$  [ppm] = 159.6, 149.2, 137.7, 136.7, 129.2, 128.3, 127.2, 122.6, 121.7, 63.2, 60.3, 58.8, 52.8, 45.2; HRMS (ESI): calculated for  $[\text{C}_{16}\text{H}_{20}\text{N}_3]^+$ :  $m/z = 254.1652$ , found:  $m/z = 254.1654$ ; IR ( $\text{v}/\text{cm}^{-1}$ , neat): 3390, 2938, 2810, 2713, 2472, 1592, 1435, 1317, 1149, 1106, 912, 777, 743, 700.

### 1-Benzyl-3-(1-benzyl-1H-imidazol-5-yl)piperazine (9i) (Scheme 2)

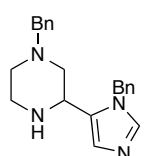

The photocatalytic synthesis of **9i** followed the general procedure with **3** (118.2 mg, 0.5 mmol, 1.0 equiv) and 1-benzyl-1H-imidazole-5-carbaldehyde (93.1 mg, 0.5 mmol, 1.0 equiv). The desired product was obtained by flash column chromatography ( $\text{CH}_2\text{Cl}_2$  to 5% MeOH in

CH<sub>2</sub>Cl<sub>2</sub>) as a yellowish solid (125.0 mg, 75%).

**m.p.:** 112–113 °C; **<sup>1</sup>H NMR** (400 MHz, CDCl<sub>3</sub>): δ [ppm] = 7.45 (d, *J* = 1.0 Hz, 1 H), 7.35–7.23 (m, 8 H), 7.08–7.06 (m, 2 H), 7.01 (apparent br, 1 H), 5.30 (d, *J* = 15.7 Hz, 1 H), 5.15 (d, *J* = 15.7 Hz, 1 H), 3.80 (ddd, *J* = 10.0, 2.8, 0.7 Hz, 1 H), 3.49 (s, 2 H), 2.94 (dt, *J* = 12.6, 3.0 Hz, 1 H), 2.88–2.81 (m, 2 H), 2.72 (apparent dq, *J* = 11.0, 2.5 Hz, 1 H), 2.31 (br, 1 H), 2.18 (dd, *J* = 10.0, 10.0 Hz, 1 H), 2.08 (apparent td, *J* = 11.0, 3.3 Hz, 1 H); **<sup>13</sup>C NMR** (100 MHz, CDCl<sub>3</sub>): δ [ppm] = 138.2, 137.6, 136.7, 132.2, 129.2, 129.0, 128.3, 128.0, 127.1, 126.9, 126.8, 63.3, 58.4, 53.7, 50.6, 48.7, 45.5; **HRMS** (ESI): calculated for [C<sub>21</sub>H<sub>25</sub>N<sub>4</sub>]<sup>+</sup>: *m/z* = 333.2074, found: *m/z* = 333.2073; **IR** (v/cm<sup>-1</sup>, neat): 3303, 2811, 1668, 1496, 1454, 1342, 1316, 1267, 1225, 1111, 909, 814, 732.

### *N*-(4-((2*R*,6*S*)-4-Benzyl-6-methylpiperazin-2-yl)phenyl)acetamide (**16a**) (Scheme 3)

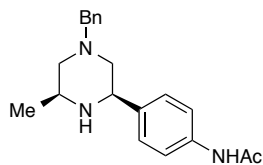

The photocatalytic synthesis of **16a** followed the general procedure with **10** (125.2 mg, 0.5 mmol, 1.0 equiv) and *N*-(4-formylphenyl)acetamide (81.6 mg, 0.5 mmol, 1.0 equiv). The desired product was obtained by flash column chromatography (CH<sub>2</sub>Cl<sub>2</sub> to 10% MeOH in CH<sub>2</sub>Cl<sub>2</sub>) as a yellowish oil (149.7 mg, 93%, dr > 20:1). The relative stereochemistry was assigned by NOESY.

[α]<sub>D</sub><sup>25</sup> (*c* = 1.0, CHCl<sub>3</sub>) = +10.1; **<sup>1</sup>H NMR** (400 MHz, CDCl<sub>3</sub>): δ [ppm] = 8.11 (s, 1 H), 7.46–7.43 (m, 2 H), 7.35–7.25 (m, 7 H), 3.94 (dd, *J* = 10.7, 2.8 Hz, 1 H), 3.58 (d, *J* = 13.1 Hz, 1 H), 3.53 (d, *J* = 13.1 Hz, 1 H), 3.10 (dq, *J* = 10.6, 6.3, 2.8 Hz, 1 H), 2.88 (d, *J* = 10.9 Hz, 1 H), 2.82 (d, *J* = 10.8 Hz, 1 H), 2.62 (br, 1 H), 2.13 (s, 3 H), 2.04 (dd, *J* = 10.9, 10.7 Hz, 1 H), 1.82 (dd, *J* = 10.8, 10.6 Hz, 1 H), 1.10 (d, *J* = 6.3 Hz, 3 H); **<sup>13</sup>C NMR** (100 MHz, CDCl<sub>3</sub>): δ [ppm] = 168.9, 138.0, 137.9, 137.4, 129.3, 128.3, 127.7, 127.1, 120.2, 63.1, 60.4, 60.0, 60.0, 51.1, 24.4, 19.8; **HRMS** (ESI): calculated for [C<sub>20</sub>H<sub>26</sub>N<sub>3</sub>O]<sup>+</sup>: *m/z* = 324.2070, found: *m/z* = 324.2071; **IR** (v/cm<sup>-1</sup>, neat): 3298, 3261, 3060, 3030, 2962, 2932, 2810, 1667, 1604, 1541, 1517, 1317, 1130, 909, 836, 732, 700.

### (3*S*,5*S*)-1-Benzyl-3-(6-bromopyridin-2-yl)-5-methylpiperazine (**16b**) (Scheme 3)

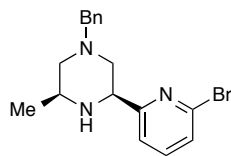

The photocatalytic synthesis of **16b** followed the general procedure with **10** (125.2 mg, 0.5 mmol, 1.0 equiv) and 5-bromopyridine-2-carbaldehyde (93.0 mg, 0.5 mmol, 1.0 equiv). The desired product was obtained by flash column chromatography (CH<sub>2</sub>Cl<sub>2</sub> to 10% MeOH in CH<sub>2</sub>Cl<sub>2</sub>) as a yellowish oil (89.4 mg, 52%, dr > 20:1). The relative stereochemistry was determined by analogy to **16a**.

[α]<sub>D</sub><sup>25</sup> (*c* = 1.0, CHCl<sub>3</sub>) = +20.3; **<sup>1</sup>H NMR** (400 MHz, CDCl<sub>3</sub>): δ [ppm] = 7.48 (t, *J* = 7.7 Hz, 1 H), 7.36–7.24 (m, 7 H), 4.07 (dd, *J* = 10.5, 3.0 Hz, 1 H), 3.58 (d, *J* = 13.1 Hz, 1 H), 3.54 (d, *J* = 13.1 Hz, 1 H), 3.12–3.04 (m, 2 H), 2.84 (dd, *J* = 10.8, 2.9 Hz, 1 H), 2.20 (br, 1 H), 2.02 (dd, *J* = 10.6, 10.5 Hz, 1 H), 1.75 (dd, *J* = 10.8, 10.7 Hz, 1 H), 1.11 (d, *J* = 6.4 Hz, 3 H); **<sup>13</sup>C NMR** (100 MHz, CDCl<sub>3</sub>): δ [ppm] = 162.5, 141.6, 138.9, 138.0, 129.2, 128.3, 127.1, 126.8, 120.2, 63.1, 60.5, 60.3, 58.7, 50.5, 19.9; **HRMS** (ESI): calculated for [C<sub>17</sub>H<sub>21</sub>BrN<sub>3</sub>]<sup>+</sup>: *m/z* = 346.0913, found: *m/z* = 346.0912; **IR** (v/cm<sup>-1</sup>, neat): 3287, 2960, 2805, 1581, 1555, 1435, 1407, 1315, 1119, 1061, 985, 791, 739, 699.

### 4-((2*S*,6*S*)-4-Benzyl-6-methylpiperazin-2-yl)oxazole (**16c**) (Scheme 3)

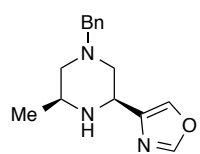

The photocatalytic synthesis of **16c** followed the general procedure with **10** (125.2 mg, 0.5 mmol, 1.0 equiv) and 1,3-oxazole-4-carboxaldehyde (48.5 mg, 0.5 mmol, 1.0 equiv). The desired product was obtained by flash column chromatography (CH<sub>2</sub>Cl<sub>2</sub> to 10% MeOH in CH<sub>2</sub>Cl<sub>2</sub>) as a yellowish oil (87.6 mg, 68%, dr > 20:1). The relative stereochemistry was determined by analogy to **16a**.

[α]<sub>D</sub><sup>25</sup> (*c* = 1.0, CHCl<sub>3</sub>) = +7.0; **<sup>1</sup>H NMR** (400 MHz, CDCl<sub>3</sub>): δ [ppm] = 7.82 (d, *J* = 1.0 Hz, 1 H), 7.55 (t, *J* = 1.0 Hz, 1 H), 7.36–7.24 (m, 5 H), 4.04 (dd, *J* = 10.6, 3.0 Hz, 1 H), 3.56 (s, 2 H), 3.12–3.04 (m, 2 H), 2.84 (dd, *J* = 10.9, 2.9 Hz, 1 H), 2.20 (br, 1 H), 2.08 (dd, *J* = 10.6, 10.5 Hz, 1 H), 1.77 (dd, *J* = 10.9, 10.1 Hz, 1 H), 1.08 (d, *J* = 6.4 Hz, 3 H); **<sup>13</sup>C NMR** (100 MHz, CDCl<sub>3</sub>): δ [ppm] = 151.0, 141.2, 137.9, 134.5, 129.2,

128.3, 127.2, 63.1, 60.5, 57.7, 52.5, 50.7, 19.8; **HRMS** (ESI): calculated for  $[C_{15}H_{20}N_3O]^+$ :  $m/z$  = 258.1601, found:  $m/z$  = 258.1603; **IR** ( $\nu/cm^{-1}$ , neat): 3287, 2961, 2810, 1669, 1510, 1455, 1317, 1137, 1100, 1061, 914, 744, 700.

### 5-(4-Benzyl-1,4-diazaspiro[5.5]undecan-2-yl)-2-fluorobenzonitrile (**17a**) (Scheme 3)

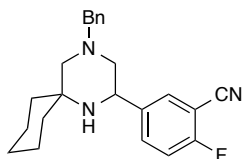

The photocatalytic synthesis of **17a** followed the general procedure with **11** (152.3 mg, 0.5 mmol, 1.0 equiv) and 2-fluoro-5-formylbenzonitrile (74.6 mg, 0.5 mmol, 1.0 equiv). The desired product was obtained by flash column chromatography (1–10% EtOAc in hexanes) as a yellowish oil (94.1 mg, 52%).

**<sup>1</sup>H NMR** (400 MHz,  $CDCl_3$ ):  $\delta$  [ppm] = 7.76 (dd,  $J$  = 6.2, 2.3 Hz, 1 H), 7.67 (ddd,  $J$  = 8.8, 5.2, 2.3 Hz, 1 H), 7.39–7.33 (m, 4 H), 7.30–7.27 (m, 1 H), 7.16 (t,  $J$  = 8.7 Hz, 1 H), 4.22 (dd,  $J$  = 10.5, 3.2 Hz, 1 H), 3.57 (d,  $J$  = 13.4 Hz, 1 H), 3.45 (d,  $J$  = 13.4 Hz, 1 H), 2.87 (dd,  $J$  = 10.6, 3.2 Hz, 1 H), 2.79 (d,  $J$  = 11.0 Hz, 1 H), 1.90 (dd,  $J$  = 10.6, 10.5 Hz, 2 H), 1.89 (br, 1 H), 1.81 (d,  $J$  = 11.0 Hz, 1 H), 1.56–1.34 (m, 10 H); **<sup>13</sup>C NMR** (100 MHz,  $CDCl_3$ ):  $\delta$  [ppm] = 162.3 (d,  $J$  = 258.2 Hz), 140.6 (d,  $J$  = 3.5 Hz), 138.6, 134.1 (d,  $J$  = 8.2 Hz), 132.2, 128.7, 128.3, 127.1, 116.1 (d,  $J$  = 19.3 Hz), 114.2, 101.2 (d,  $J$  = 15.4 Hz), 62.9, 62.1, 62.0, 53.3, 52.0, 38.8, 32.1, 26.4, 22.0, 21.8; **<sup>19</sup>F NMR** (377 MHz,  $CDCl_3$ ):  $\delta$  [ppm] = –108.9; **HRMS** (ESI): calculated for  $[C_{23}H_{27}FN_3]^+$ :  $m/z$  = 364.2184, found:  $m/z$  = 364.2183; **IR** ( $\nu/cm^{-1}$ , neat): 2926, 2854, 2801, 2235, 1611, 1497, 1454, 1266, 1110, 834, 739, 699.

### 2-(4-Benzyl-1,4-diazaspiro[5.5]undecan-2-yl)thiazole (**17b**) (Scheme 3)

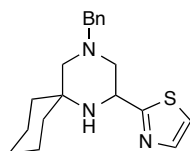

The photocatalytic synthesis of **17b** was followed by the general procedure with **11** (152.3 mg, 0.5 mmol, 1.0 equiv) and thiazole-2-carbaldehyde (43.9  $\mu$ L, 0.5 mmol, 1.0 equiv). The desired product was obtained by flash column chromatography (5–30% EtOAc in hexanes) as a yellowish oil (61.4 mg, 37%).

**<sup>1</sup>H NMR** (400 MHz,  $CDCl_3$ ):  $\delta$  [ppm] = 7.73 (d,  $J$  = 3.3 Hz, 1 H), 7.38–7.31 (m, 4 H), 7.29–7.25 (m, 1 H), 7.26 (d,  $J$  = 3.3 Hz, 1 H), 4.62 (dd,  $J$  = 10.5, 3.4 Hz, 1 H), 3.62 (d,  $J$  = 13.4 Hz, 1 H), 3.46 (d,  $J$  = 13.4 Hz, 1 H), 3.24 (dd,  $J$  = 10.6, 3.4 Hz, 1 H), 2.80 (d,  $J$  = 11.0 Hz, 1 H), 2.09 (dd,  $J$  = 10.6, 10.5 Hz, 1H), 1.88 (apparent t,  $J$  = 6.0 Hz, 2 H), 1.81 (d,  $J$  = 11.0 Hz, 1 H), 1.58–1.48 (m, 2 H), 1.47–1.32 (m, 7 H); **<sup>13</sup>C NMR** (100 MHz,  $CDCl_3$ ):  $\delta$  [ppm] = 173.5, 142.3, 138.7, 128.8, 128.3, 127.1, 118.6, 62.9, 62.0, 60.9, 52.9, 52.3, 38.6, 32.2, 26.5, 22.0, 21.8; **HRMS** (ESI): calculated for  $[C_{19}H_{26}N_3S]^+$ :  $m/z$  = 328.1842, found:  $m/z$  = 328.1846; **IR** ( $\nu/cm^{-1}$ , neat): 2926, 2854, 2800, 1673, 1453, 1327, 1129, 781, 736, 698.

### 5-(4-Benzyl-1,4-diazaspiro[5.5]undecan-2-yl)-3-phenylisoxazole (**17c**) (Scheme 3)

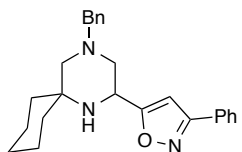

The photocatalytic synthesis of **17c** followed the general procedure with **11** (152.3 mg, 0.5 mmol, 1.0 equiv) and 3-phenylisoxazole-5-carbaldehyde (86.6 mg, 0.5 mmol, 1.0 equiv). The desired product was obtained by flash column chromatography (1–5% EtOAc in hexanes) as a yellowish oil (71.2 mg, 38%).

**<sup>1</sup>H NMR** (400 MHz,  $CDCl_3$ ):  $\delta$  [ppm] = 7.80–7.78 (m, 2 H), 7.45–7.42 (m, 3 H), 7.37–7.31 (m, 4 H), 7.29–7.25 (m, 1 H), 6.48 (s, 1 H), 4.47 (dd,  $J$  = 10.6, 2.6 Hz, 1 H), 3.60 (d,  $J$  = 13.3 Hz, 1 H), 3.46 (d,  $J$  = 13.3 Hz, 1 H), 3.15 (dd,  $J$  = 10.5, 2.6 Hz, 1 H), 2.79 (d,  $J$  = 11.1 Hz, 1 H), 2.15 (dd,  $J$  = 10.6, 10.5 Hz, 1 H), 1.90–1.81 (m, 2 H), 1.81 (d,  $J$  = 11.1 Hz, 1 H), 1.56–1.49 (m, 2 H), 1.45–1.33 (m, 7 H); **<sup>13</sup>C NMR** (100 MHz,  $CDCl_3$ ):  $\delta$  [ppm] = 174.1, 162.3, 138.5, 130.0, 129.2, 128.9, 128.8, 128.4, 127.2, 126.9, 98.7, 62.9, 62.0, 58.5, 52.1, 47.9, 38.5, 32.0, 26.4, 21.9, 21.8; **HRMS** (ESI): calculated for  $[C_{25}H_{30}N_3O]^+$ :  $m/z$  = 388.2383, found:  $m/z$  = 388.2383; **IR** ( $\nu/cm^{-1}$ , neat): 3061, 3028, 2928, 2854, 2803, 1603, 1579, 1454, 1442, 1406, 1308, 1144, 910, 768, 735, 695.

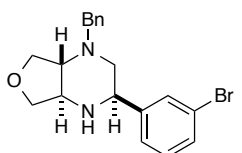

### (*trans,cis*)-1-Benzyl-3-(3-bromophenyl)octahydrofuro[3,4-*b*]pyrazine (**18a**) (Scheme 3)

The photocatalytic synthesis of **18a** followed the general procedure with **12** (139.2 mg, 0.5 mmol, 1.0 equiv) and 3-bromobenzaldehyde (58.3  $\mu$ L, 0.5 mmol, 1.0 equiv).

The desired product was obtained by flash column chromatography (10–50% EtOAc in hexanes) as a yellowish oil (120.6 mg, 65%, dr > 20:1). The relative stereochemistry was determined by analogy to **18b**.

**<sup>1</sup>H NMR** (400 MHz, CDCl<sub>3</sub>): δ [ppm] = 7.59 (t, *J* = 2.0 Hz, 1 H), 7.41 (ddd, *J* = 7.9, 2.0, 1.1 Hz, 1 H), 7.34–7.26 (m, 6 H), 7.18 (t, *J* = 7.9 Hz, 1 H), 4.06–4.02 (m, 2 H), 4.01 (dd, *J* = 10.6, 3.1 Hz, 1 H), 3.71 (dd, *J* = 10.6, 7.2 Hz, 1 H), 3.65 (d, *J* = 13.1 Hz, 1 H), 3.59 (dd, *J* = 10.5, 7.0 Hz, 1 H), 3.36 (d, *J* = 13.1 Hz, 1 H), 3.27 (ddd, *J* = 10.6, 9.2, 7.2 Hz, 1 H), 2.92 (dd, *J* = 11.4, 3.1 Hz, 1 H), 2.51 (ddd, *J* = 10.5, 9.2, 7.0 Hz, 1 H), 2.05 (dd, *J* = 11.4, 10.6 Hz, 1 H), 2.04 (br, 1 H); **<sup>13</sup>C NMR** (100 MHz, CDCl<sub>3</sub>): δ [ppm] = 144.0, 137.5, 130.9, 130.4, 130.1, 129.2, 128.4, 127.5, 126.1, 122.6, 69.9, 69.8, 68.2, 62.0, 61.8, 61.0, 60.9; **HRMS** (ESI): calculated for [C<sub>19</sub>H<sub>22</sub>BrN<sub>2</sub>O]<sup>+</sup>: *m/z* = 373.0190, found: *m/z* = 373.0906; **IR** (ν/cm<sup>−1</sup>, neat): 3299, 2938, 2868, 2820, 1676, 1568, 1453, 1324, 1034, 892, 785, 741, 698.

**(*trans,cis*)-1-Benzyl-3-(5-methylisoxazol-3-yl)octahydrofuro[3,4-*b*]pyrazine (**18b**) (Scheme 3)**

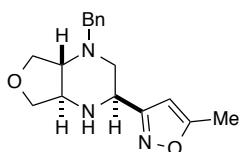

The photocatalytic synthesis of **18b** followed the general procedure with **12** (139.2 mg, 0.5 mmol, 1.0 equiv) and 5-methylisoxazole-3-carbaldehyde (55.6 mg, 0.5 mmol, 1.0 equiv). The desired product was obtained by flash column chromatography (CH<sub>2</sub>Cl<sub>2</sub> to 5% MeOH in CH<sub>2</sub>Cl<sub>2</sub>) as a yellowish oil (107.7 mg, 72%, dr > 20:1). The relative stereochemistry was assigned by NOESY.

**<sup>1</sup>H NMR** (400 MHz, CDCl<sub>3</sub>): δ [ppm] = 7.33–7.23 (m, 5 H), 5.96 (d, *J* = 1.0 Hz, 1 H), 4.19 (dd, *J* = 11.0, 3.2 Hz, 1 H), 4.02 (dd, *J* = 7.3, 7.3 Hz, 1 H), 3.99 (dd, *J* = 7.5, 6.7 Hz, 1 H), 3.64 (d, *J* = 13.2 Hz, 1 H), 3.62 (dd, *J* = 10.7, 7.3 Hz, 1 H), 3.55 (dd, *J* = 10.5, 7.5 Hz, 1 H), 3.35 (d, *J* = 13.2 Hz, 1 H), 3.23 (ddd, *J* = 10.7, 9.1, 7.3 Hz, 1 H), 3.05 (dd, *J* = 11.2, 3.2 Hz, 1 H), 2.43 (ddd, *J* = 10.5, 9.1, 6.7 Hz, 1 H), 2.37 (d, *J* = 1.0 Hz, 3 H), 2.13 (dd, *J* = 11.2, 11.0 Hz, 1 H), 2.06 (br, 1 H); **<sup>13</sup>C NMR** (100 MHz, CDCl<sub>3</sub>): δ [ppm] = 169.5, 163.9, 137.3, 129.1, 128.3, 127.4, 100.0, 69.6, 69.4, 68.2, 61.7, 61.7, 57.9, 53.4, 12.2; **HRMS** (ESI): calculated for [C<sub>17</sub>H<sub>22</sub>N<sub>3</sub>O<sub>2</sub>]<sup>+</sup>: *m/z* = 300.1707, found: *m/z* = 300.1706; **IR** (ν/cm<sup>−1</sup>, neat): 3290, 2939, 2869, 1673, 1604, 1453, 1322, 1146, 1087, 1025, 893, 799, 745, 701.

**(*trans*)-4'-Benzylhexahydro-1'*H*-spiro[cyclohexane-1,2'-furo[3,4-*b*]pyrazin]-4-one ethylene ketal (**18c**) (Scheme 3)**

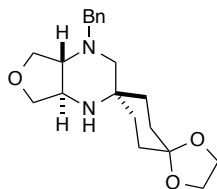

The photocatalytic synthesis of **18c** followed the general procedure with **12** (139.2 mg, 0.5 mmol, 1.0 equiv) and 1,4-dioxaspiro[4.5]decan-8-one (78.1 mg, 0.5 mmol, 1.0 equiv). The desired product was obtained by flash column chromatography (CH<sub>2</sub>Cl<sub>2</sub> to 5% MeOH in CH<sub>2</sub>Cl<sub>2</sub>) as a white solid (72.0 mg, 42%).

**m.p.**: 135–136 °C; **<sup>1</sup>H NMR** (400 MHz, CDCl<sub>3</sub>): δ [ppm] = 7.32–7.21 (m, 5 H), 3.96 (dd, *J* = 7.1, 7.1 Hz, 1 H), 3.96 (dd, *J* = 7.0, 7.0 Hz, 1 H), 3.92–3.85 (m, 4 H), 3.59 (d, *J* = 13.3 Hz, 1 H), 3.55–3.48 (m, 2 H), 3.31 (ddd, *J* = 10.7, 9.4, 7.1 Hz, 1 H), 3.19 (d, *J* = 13.3 Hz, 1 H), 2.72 (d, *J* = 11.5 Hz, 1 H), 2.22 (ddd, *J* = 10.5, 9.4, 7.0 Hz, 1 H), 2.12–2.06 (m, 1 H), 1.80–1.67 (m, 3 H), 1.71 (d, *J* = 11.5 Hz, 1 H), 1.58–1.41 (m, 5 H); **<sup>13</sup>C NMR** (100 MHz, CDCl<sub>3</sub>): δ [ppm] = 138.2, 128.7, 128.3, 127.3, 109.0, 70.2, 69.8, 69.6, 64.3, 64.3, 63.0, 61.5, 56.8, 52.8, 35.7, 30.5, 30.4, 29.3; **HRMS** (ESI): calculated for [C<sub>20</sub>H<sub>29</sub>N<sub>2</sub>O<sub>3</sub>]<sup>+</sup>: *m/z* = 345.2173, found: *m/z* = 345.2175; **IR** (ν/cm<sup>−1</sup>, neat): 2945, 2872, 1736, 1675, 1453, 1370, 1094, 1033, 938 888, 740, 700.

**(*trans,cis*)-3-(Benzo[*d*][1,3]dioxol-5-yl)-1-benzyldecahydroquinoxaline (**19a**) (Scheme 3)**

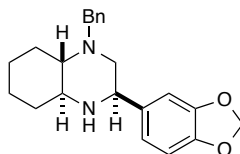

The photocatalytic synthesis of **19a** followed the general procedure with **13** (145.3 mg, 0.5 mmol, 1.0 equiv) and benzo[*d*][1,3]dioxole-5-carbaldehyde (75.1 mg, 0.5 mmol, 1.0 equiv). The desired product was obtained by flash column chromatography (10–50% EtOAc in hexanes) as a yellowish oil (150.3 mg, 86%, dr > 20:1). The relative stereochemistry was assigned by NOESY.

**<sup>1</sup>H NMR** (400 MHz, CDCl<sub>3</sub>): δ [ppm] = 7.31 (d, *J* = 4.4 Hz, 4 H), 7.29–7.21 (m, 1 H), 6.89 (d, *J* = 1.6 Hz, 1 H), 6.80 (dd, *J* = 8.0, 1.6 Hz, 1 H), 6.72 (d, *J* = 8.0 Hz, 1 H), 5.91 (s, 2 H), 4.15 (d, *J* = 13.6 Hz, 1 H), 3.88 (dd, *J* = 10.9, 2.8 Hz, 1 H), 3.25 (d, *J* = 13.6 Hz, 1 H), 2.83 (dd, *J* = 10.9, 2.8 Hz, 1 H), 2.67 (ddd, *J* = 10.6,

8.7, 3.9 Hz, 1 H), 2.33–2.29 (m, 1 H), 2.12 (dd,  $J = 10.9, 10.9$  Hz, 1 H), 1.99 (ddd,  $J = 10.6, 8.6, 3.6$  Hz, 1H), 1.88–1.84 (m, 1 H), 1.78–1.71 (m, 3 H), 1.49–1.33 (m, 3 H), 1.30–1.19 (m, 1 H);  $^{13}\text{C}$  NMR (100 MHz,  $\text{CDCl}_3$ ):  $\delta$  [ppm] = 147.5, 146.7, 138.8, 136.9, 129.2, 128.2, 126.8, 120.2, 108.0, 107.7, 100.9, 65.6, 61.1, 60.8, 60.2, 57.2, 32.8, 29.1, 25.4, 24.9; **HRMS** (ESI): calculated for  $[\text{C}_{22}\text{H}_{27}\text{N}_2\text{O}_2]^+$ :  $m/z = 351.2067$ , found:  $m/z = 351.2069$ ; **IR** ( $\text{v}/\text{cm}^{-1}$ , neat): 2926, 2856, 2799, 1502, 1487, 1442, 1250, 1039, 934, 808, 735, 699.

**(*trans,cis*)-1-Benzyl-3-(1-methyl-1*H*-benzo[*d*]imidazol-2-yl)decahydroquinoxaline (19b) (Scheme 3)**

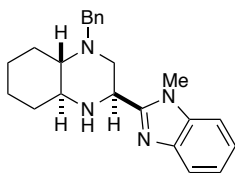

The photocatalytic synthesis of **19b** followed the general procedure with **13** (145.3 mg, 0.5 mmol, 1.0 equiv) and 1-methyl-1*H*-benzo[*d*]imidazole-2-carbaldehyde (80.1 mg, 0.5 mmol, 1.0 equiv). The desired product was obtained by flash column chromatography ( $\text{CH}_2\text{Cl}_2$  to 5% MeOH in  $\text{CH}_2\text{Cl}_2$ ) as a yellowish oil (153.2 mg, 85%). Relative stereochemistry was determined by analogy to **19a**.

$^1\text{H}$  NMR (400 MHz,  $\text{CDCl}_3$ ):  $\delta$  [ppm] = 7.75–7.71 (m, 1 H), 7.35–7.27 (m, 4 H), 7.25–7.20 (m, 4 H), 4.32 (dd,  $J = 10.7, 2.9$  Hz, 1 H), 4.22 (d,  $J = 13.4$  Hz, 1 H), 3.67 (s, 3 H), 3.21 (d,  $J = 13.4$  Hz, 1 H), 3.03 (dd,  $J = 11.6, 2.9$  Hz, 1 H), 2.69 (ddd,  $J = 10.8, 8.7, 3.4$  Hz, 1 H), 2.44 (dd,  $J = 11.6, 10.7$  Hz, 1 H), 2.35–2.31 (m, 1 H), 2.18 (br, 1 H), 1.98 (ddd,  $J = 10.8, 8.7, 3.5$  Hz, 1 H), 1.91–1.83 (m, 2 H), 1.81–1.77 (m, 1 H), 1.45–1.32 (m, 3 H), 1.29–1.19 (m, 1 H);  $^{13}\text{C}$  NMR (100 MHz,  $\text{CDCl}_3$ ):  $\delta$  [ppm] = 153.8, 142.2, 138.7, 135.6, 129.0, 128.2, 126.9, 122.4, 121.9, 119.5, 109.1, 67.1, 60.3, 57.4, 57.0, 52.6, 32.5, 29.8, 29.0, 25.3 (two carbons); **HRMS** (ESI): calculated for  $[\text{C}_{23}\text{H}_{29}\text{N}_4]^+$ :  $m/z = 361.2387$ , found:  $m/z = 361.2390$ ; **IR** ( $\text{v}/\text{cm}^{-1}$ , neat): 3257, 2931, 2857, 2802, 1472, 1443, 1332, 1132, 909, 742.

**(*trans,cis*)-1-Benzyl-3-(2-methylprop-1-en-1-yl)decahydroquinoxaline (19c) (Scheme 3)**

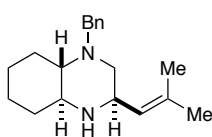

The photocatalytic synthesis of **19c** followed the general procedure with **13** (145.3 mg, 0.5 mmol, 1.0 equiv) and 3-methyl-2-butenal (48.2  $\mu\text{L}$ , 0.5 mmol, 1.0 equiv). The desired product was obtained by flash column chromatography ( $\text{CH}_2\text{Cl}_2$  to 10% MeOH in  $\text{CH}_2\text{Cl}_2$ ) as a yellowish oil (57.0 mg, 40%, dr > 20:1). The relative stereochemistry was determined by analogy to **19a**.

$^1\text{H}$  NMR (400 MHz,  $\text{CDCl}_3$ ):  $\delta$  [ppm] = 7.31–7.20 (m, 5 H), 5.06 (d,  $J = 8.8$  Hz, 1 H), 4.10 (d,  $J = 13.5$  Hz, 1 H), 3.69–3.63 (m, 1 H), 3.19 (d,  $J = 13.5$  Hz, 1 H), 2.58–2.65 (m, 1 H), 2.65 (dd,  $J = 11.7, 3.1$  Hz, 1 H), 2.29–2.24 (m, 1 H), 2.09–2.01 (m, 2 H), 1.86–1.76 (m, 2 H), 1.73–1.68 (m, 1 H), 1.63 (d,  $J = 1.4$  Hz, 3 H), 1.61 (d,  $J = 1.4$  Hz, 3 H), 1.47–1.10 (m, 5 H);  $^{13}\text{C}$  NMR (100 MHz,  $\text{CDCl}_3$ ):  $\delta$  [ppm] = 138.7, 136.5 (br), 129.2, 128.3, 127.0, 123.6 (br), 64.8, 60.3, 57.5, 57.0, 54.0, 31.7, 29.1, 25.9, 25.1, 24.9, 18.5; **HRMS** (ESI): calculated for  $[\text{C}_{19}\text{H}_{29}\text{N}_2]^+$ :  $m/z = 285.2325$ , found:  $m/z = 285.2326$ ; **IR** ( $\text{v}/\text{cm}^{-1}$ , neat): 3308, 2929, 2856, 2795, 1673, 1447, 1375, 1135, 1084, 749, 739, 699.

**(3*R*,8*aS*)-3-(2-Chloro-4-fluorophenyl)octahydropyrrolo[1,2-*a*]pyrazine (20a) (Scheme 3)**

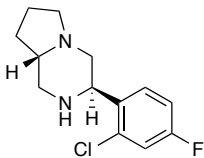

The photocatalytic synthesis of **20a** followed the general procedure with **14** (93.2 mg, 0.5 mmol, 1.0 equiv) and 2-chloro-4-fluorobenzaldehyde (79.3 mg, 0.5 mmol, 1.0 equiv). The desired product was obtained by flash column chromatography ( $\text{CH}_2\text{Cl}_2$  to 10% MeOH in  $\text{CH}_2\text{Cl}_2$ ) as a yellowish oil (71.8 mg, 56%, dr > 20:1). The relative stereochemistry was determined by analogy to **21b**.

$[\alpha]_D^{26}$  ( $c = 1.0$ ,  $\text{CHCl}_3$ ) =  $-58.3$ ;  $^1\text{H}$  NMR (400 MHz,  $\text{CDCl}_3$ ):  $\delta$  [ppm] = 7.61 (dd,  $J = 8.7, 6.3$  Hz, 1 H), 7.07 (dd,  $J = 8.6, 2.7$  Hz, 1 H), 6.94 (ddd,  $J = 8.7, 8.3, 2.7$  Hz, 1 H), 4.34 (dd,  $J = 10.1, 2.9$  Hz, 1 H), 3.25 (dd,  $J = 11.0, 2.9$  Hz, 1 H), 3.20 (dd,  $J = 10.6, 2.9$  Hz, 1 H), 3.09 (ddd,  $J = 8.7, 8.6, 2.3$  Hz, 1 H), 2.72 (dd,  $J = 11.0, 10.0$  Hz, 1 H), 2.24 (br, 1 H), 2.16 (ddd,  $J = 8.8, 8.8, 8.7$  Hz, 1H), 2.09 (dddd,  $J = 10.0, 6.5, 6.0, 2.9$  Hz, 1 H), 2.00 (dd,  $J = 10.6, 10.1$  Hz, 1 H), 1.89–1.80 (m, 2 H), 1.78–1.70 (m, 1 H), 1.50–1.40 (m, 1 H);  $^{13}\text{C}$  NMR (100 MHz,  $\text{CDCl}_3$ ):  $\delta$  [ppm] = 161.6 (d,  $J = 249.0$  Hz), 135.6 (d,  $J = 3.5$  Hz), 133.8 (d,  $J = 10.1$  Hz), 129.4 (d,  $J = 8.6$  Hz), 116.8 (d,  $J = 24.5$  Hz), 114.2 (d,  $J = 20.6$  Hz), 62.8, 58.3, 55.4, 53.5, 51.0, 27.4, 21.3;  $^{19}\text{F}$  NMR (377 MHz,  $\text{CDCl}_3$ ):  $\delta$  [ppm] =  $-113.5$ ; **HRMS** (ESI): calculated for  $[\text{C}_{13}\text{H}_{17}\text{ClFN}_2]^+$ :  $m/z = 255.1059$ , found:  $m/z = 255.1061$ ; **IR** ( $\text{v}/\text{cm}^{-1}$ , neat): 3254, 2962, 2798, 1675, 1604, 1581, 1489, 1232, 1166, 1136, 1040, 911, 857, 822.

**(3*R*,8*aS*)-3-(5-Methyl-1-phenyl-1*H*-pyrazol-4-yl)octahydropyrrolo[1,2-*a*]pyrazine (20b) (Scheme 3)**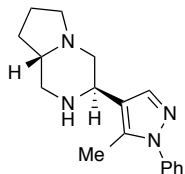

The photocatalytic synthesis of **20b** followed the general procedure with **14** (93.2 mg, 0.5 mmol, 1.0 equiv) and 5-methyl-1-phenyl-1*H*-pyrazole-4-carbaldehyde (93.1 mg, 0.5 mmol, 1.0 equiv). The desired product was obtained by flash column chromatography (CH<sub>2</sub>Cl<sub>2</sub> to 10% MeOH in CH<sub>2</sub>Cl<sub>2</sub>) as a yellowish oil (91.9 mg, 63%, dr > 20:1). The relative stereochemistry was determined by analogy to **21b**.

$[\alpha]_D^{25}$  (c = 1.0, CHCl<sub>3</sub>) = −20.0; <sup>1</sup>H NMR (400 MHz, CDCl<sub>3</sub>): δ [ppm] = 7.67 (s, 1 H), 7.45–7.32 (m, 5 H), 3.93 (dd, *J* = 10.5, 3.1 Hz, 1 H), 3.74 (br, 1 H), 3.22 (dd, *J* = 11.6, 2.8 Hz, 1 H), 3.14 (dd, *J* = 10.8, 3.1 Hz, 1 H), 3.12–3.07 (m, 1 H), 2.67 (dd, *J* = 11.6, 10.1 Hz, 1 H), 2.35 (dd, *J* = 10.8, 10.5 Hz, 1 H), 2.30 (s, 3 H), 2.22 (ddd, *J* = 8.9, 8.9, 8.9 Hz, 1 H), 2.14 (dddd, *J* = 10.2, 6.0, 3.6, 2.8 Hz, 1 H), 1.91–1.81 (m, 2 H), 1.79–1.70 (m, 1 H), 1.45–1.43 (m, 1 H); <sup>13</sup>C NMR (100 MHz, CDCl<sub>3</sub>): δ [ppm] = 139.9, 138.5, 136.4, 129.1, 127.8, 125.1, 119.8, 62.5, 58.7, 53.6, 51.3, 50.8, 27.4, 21.1, 11.1; HRMS (ESI): calculated for [C<sub>17</sub>H<sub>23</sub>N<sub>4</sub>]<sup>+</sup>: *m/z* = 283.1917, found: *m/z* = 283.1919; IR (ν/cm<sup>−1</sup>, neat): 3294, 2952, 2800, 1599, 1504, 1453, 1391, 1170, 1110, 943, 858, 765, 696.

**(*R*)-*tert*-Butyl 2,2-dimethyl-4-((3*S*,8*aS*)-octahydropyrrolo[1,2-*a*]pyrazin-3-yl)oxazolidine-3-carboxylate (20c) (Scheme 3)**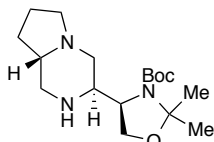

The photocatalytic synthesis of **20c** followed the general procedure with **14** (93.2 mg, 0.5 mmol, 1.0 equiv) and (*S*)-(-)-3-(*tert*-butoxycarbonyl)-4-formyl-2,2-dimethyl-1,3-oxazolidine (114.6 mg, 0.5 mmol, 1.0 equiv). The desired product was obtained by flash column chromatography (CH<sub>2</sub>Cl<sub>2</sub> to 10% MeOH in CH<sub>2</sub>Cl<sub>2</sub>) as a yellowish oil (94.7 mg, 58%, dr > 20:1). The relative stereochemistry was determined by analogy to **21b**.

$[\alpha]_D^{26}$  (c = 1.0, CHCl<sub>3</sub>) = −31.5; <sup>1</sup>H NMR (400 MHz, CDCl<sub>3</sub>): δ [ppm] = 4.15 (br, 1 H), 4.07 (br, 1 H), 3.95 (br, 1 H), 3.87 (dd, *J* = 9.4, 6.4 Hz, 1 H), 3.28 (d, *J* = 10.6 Hz, 1 H), 3.18 (d, *J* = 10.6 Hz, 1 H), 3.14–3.09 (m, 2 H), 2.65 (dd, *J* = 10.9, 10.9 Hz, 1 H), 2.26 (ddd, *J* = 8.8, 8.2, 8.2 Hz, 1 H), 2.17–2.13 (m, 2 H), 1.87–1.71 (m, 3 H), 1.54 (s, 3 H), 1.45–1.39 (m, 13 H); <sup>13</sup>C NMR (100 MHz, CDCl<sub>3</sub>): δ [ppm] = 153.0\*, 152.3, 94.3, 93.9\*, 80.6, 64.2, 62.8, 59.3\*, 58.9, 56.0, 53.5, 53.2\*, 52.8, 49.9, 28.5, 27.0, 26.9\*, 26.1, 23.9\*, 22.4, 21.0;<sup>15</sup> HRMS (ESI): calculated for [C<sub>17</sub>H<sub>32</sub>N<sub>3</sub>O<sub>3</sub>]<sup>+</sup>: *m/z* = 326.2438, found: *m/z* = 326.2438; IR (ν/cm<sup>−1</sup>, neat): 3319, 2975, 2938, 2879, 2807, 1696, 1378, 1365, 1256, 1172, 1088, 848, 734.

***cis*-3-Mesityloctahydro-1*H*-pyrido[1,2-*a*]pyrazine (21a) (Scheme 3)**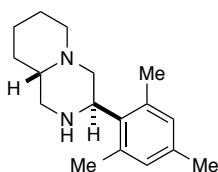

The photocatalytic synthesis of **21a** followed the general procedure with **15** (100.2 mg, 0.5 mmol, 1.0 equiv) and 2,4,6-trimethylbenzaldehyde (73.7 μL, 0.5 mmol, 1.0 equiv). The desired product was obtained by flash column chromatography (CH<sub>2</sub>Cl<sub>2</sub> to 5% MeOH in CH<sub>2</sub>Cl<sub>2</sub>) as a yellowish oil (87.5 mg, 68%, dr > 20:1). The relative stereochemistry was determined by analogy to **21b**.

<sup>1</sup>H NMR (400 MHz, CDCl<sub>3</sub>): δ [ppm] = 6.79 (s, 2 H), 4.58 (dd, *J* = 11.2, 3.2 Hz, 1 H), 3.01 (dd, *J* = 11.6, 2.9 Hz, 1 H), 2.92 (d, *J* = 11.6 Hz, 1 H), 2.83 ddt, *J* = 11.6, 10.9 Hz, 1 H), 2.75 (dd, *J* = 11.5, 3.2 Hz, 1 H), 2.66 (dd, *J* = 11.5, 11.2 Hz, 1 H), 2.50 (s, 6 H), 2.21 (s, 3 H), 2.27–2.17 (m, 2 H), 1.83–1.79 (m, 2 H), 1.69–1.58 (m, 2 H), 1.48–1.30 (m, 2 H); <sup>13</sup>C NMR (100 MHz, CDCl<sub>3</sub>): δ [ppm] = 137.4, 136.7, 133.4, 130.3, 62.2, 57.6, 56.8, 55.6, 52.5, 29.0, 24.9, 23.8, 21.7, 20.7; HRMS (ESI): calculated for [C<sub>17</sub>H<sub>27</sub>N<sub>2</sub>]<sup>+</sup>: *m/z* = 259.2169, found: *m/z* = 259.2170; IR (ν/cm<sup>−1</sup>, neat): 3321, 2932, 2857, 2797, 1611, 1448, 1327, 1124, 1096, 1064, 924, 851, 733.

(15) Peaks from rotamers are underlined paired with asterisks indicating the major ones.

**cis-3-(Pyrimidin-2-yl)octahydro-1*H*-pyrido[1,2-*a*]pyrazine (21b) (Scheme 3)**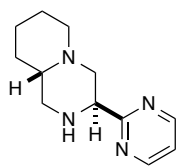

The photocatalytic synthesis of **21b** followed the general procedure with **15** (100.2 mg, 0.5 mmol, 1.0 equiv) and pyrimidine-2-carboxaldehyde (54.0 mg, 0.5 mmol, 1.0 equiv). The desired product was obtained by flash column chromatography (CH<sub>2</sub>Cl<sub>2</sub> to 20% MeOH in CH<sub>2</sub>Cl<sub>2</sub>) as a brownish oil (56.6 mg, 52%, dr > 10:1), which can be recrystallized with CH<sub>2</sub>Cl<sub>2</sub>/EtOAc/hexanes as a yellowish solid. The relative stereochemistry was assigned by NOESY.

**m.p.:** compound decomposes at T > 180 °C; **<sup>1</sup>H NMR** (400 MHz, CD<sub>2</sub>Cl<sub>2</sub>): δ [ppm] = 8.68 (d, *J* = 4.9 Hz, 2 H), 7.17 (td, *J* = 4.9, 0.5 Hz, 1 H), 4.12 (dd, *J* = 10.6, 3.1 Hz, 1 H), 3.18 (dd, *J* = 11.1, 3.1 Hz, 1 H), 2.97 (dd, *J* = 12.4, 3.0 Hz, 1 H), 2.81 (apparent dtd, *J* = 11.2, 3.6, 1.5 Hz, 1 H), 2.65 (dd, *J* = 12.4, 10.2 Hz, 1 H), 2.55 (br, 1 H), 2.11–2.03 (m, 2 H), 1.85 (dddd, *J* = 10.4, 10.2, 3.0, 2.7 Hz, 1 H), 1.78–1.73 (m, 1 H), 1.64–1.57 (m, 2 H), 1.56–1.51 (m, 1 H), 1.37–1.16 (m, 2 H); **<sup>13</sup>C NMR** (100 MHz, CD<sub>2</sub>Cl<sub>2</sub>): δ [ppm] = 169.7, 157.4, 119.9, 62.9, 61.2, 61.0, 56.7, 52.3, 30.0, 26.3, 24.8.; **HRMS** (ESI): calculated for [C<sub>12</sub>H<sub>19</sub>N<sub>4</sub>]<sup>+</sup>: *m/z* = 219.1604, found: *m/z* = 219.1607; **IR** (v/cm<sup>−1</sup>, neat): 3396, 2936, 1672, 1568, 1425, 1330, 1200, 1128, 925, 800, 730.

***tert*-Butyl octahydrospiro[azetidine-3,3'-pyrido[1,2-*a*]pyrazine]-1-carboxylate (21c) (Scheme 3)**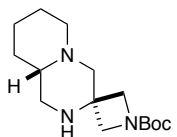

The photocatalytic synthesis of **21c** followed the general procedure with **15** (100.2 mg, 0.5 mmol, 1.0 equiv) and *tert*-butyl 3-oxoazetidine-1-carboxylate (85.6 mg, 0.5 mmol, 1.0 equiv). The desired product was obtained by flash column chromatography (CH<sub>2</sub>Cl<sub>2</sub> to 10% MeOH in CH<sub>2</sub>Cl<sub>2</sub>) as a yellowish oil (46.2 mg, 33%).

**<sup>1</sup>H NMR** (400 MHz, CDCl<sub>3</sub>): δ [ppm] = 3.97 (d, *J* = 8.9 Hz, 1 H), 3.71 (d, *J* = 8.9 Hz, 1 H), 3.66 (d, *J* = 9.2 Hz, 1 H), 3.54 (d, *J* = 9.2 Hz, 1 H), 2.83 (d, *J* = 11.1 Hz, 1 H), 2.74–2.69 (m, 2 H), 2.48 (t, *J* = 11.0, 11.0 Hz, 1 H), 2.13 (d, *J* = 11.1 Hz, 1 H), 2.02 (ddd, *J* = 11.2, 11.1, 4.3 Hz, 1 H), 1.81 (apparent t, *J* = 10.5 Hz, 1 H), 1.75–1.69 (m, 1 H), 1.61–1.51 (m, 2 H), 1.49–1.42 (m, 1 H), 1.41 (s, 9 H), 1.31–1.20 (m, 2 H), 1.16–1.10 (m, 1 H); **<sup>13</sup>C NMR** (100 MHz, CDCl<sub>3</sub>): δ [ppm] = 156.6, 79.5, 63.0, 61.4, 60.8 (br), 58.8 (br), 56.0, 52.4, 48.6, 29.4, 28.5, 25.6, 24.1; **HRMS** (ESI): calculated for [C<sub>15</sub>H<sub>28</sub>N<sub>3</sub>O<sub>2</sub>]<sup>+</sup>: *m/z* = 282.2176, found: *m/z* = 282.2175; **IR** (v/cm<sup>−1</sup>, neat): 3308, 2933, 2874, 2803, 1702, 1406, 1169, 1114, 860, 771, 733.



3.4 Procedure for *N*-Bn deprotection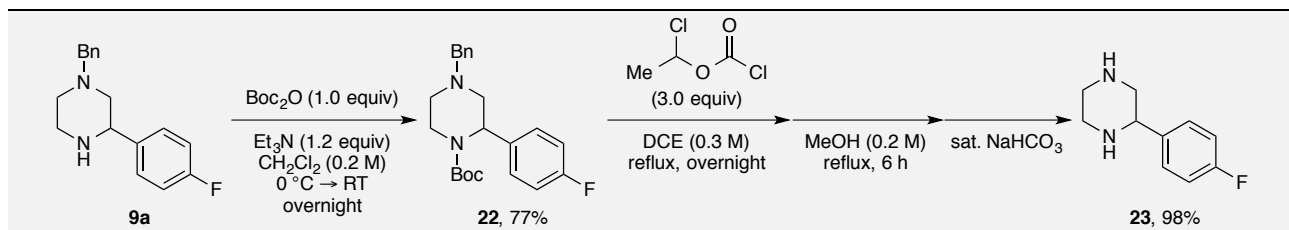*tert*-Butyl 4-benzyl-2-(4-fluorophenyl)piperazine-1-carboxylate (**22**)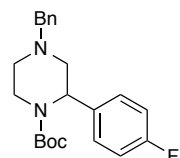

A solution of  $\text{Boc}_2\text{O}$  (436.5 mg, 2.0 mmol, 1.0 equiv) in  $\text{CH}_2\text{Cl}_2$  (5.0 mL) was added dropwise to a stirred mixture of **9a** (540.7 mg, 2.0 mmol, 1.0 equiv) and  $\text{Et}_3\text{N}$  (333.6  $\mu\text{L}$ , 2.4 mmol, 1.2 equiv) in  $\text{CH}_2\text{Cl}_2$  (5.0 mL) under  $\text{N}_2$  at 0 °C. The reaction was allowed to warm to room temperature and stirred overnight before washed with sat.  $\text{NaHCO}_{3(\text{aq})}$  (1×50 mL) and brine. The organic layer was dried over  $\text{Na}_2\text{SO}_4$ , filtered, and condensed under *vacuo*. The residue was purified by flash column chromatography (2%–8% EtOAc in hexanes) to afford the desired product (569.2 mg, 77%) as a yellowish oil.

$^1\text{H}$  NMR (400 MHz,  $\text{CDCl}_3$ ):  $\delta$  [ppm] = 7.43–7.39 (m, 2 H), 7.35–7.25 (m, 5 H), 7.01–6.95 (m, 2 H), 5.21 (apparent s, 1 H), 3.90 (apparent d,  $J$  = 13.5 Hz, 1 H), 3.58 (d,  $J$  = 13.0 Hz, 1 H), 3.45 (d,  $J$  = 13.0 Hz, 1 H), 3.22 (apparent d,  $J$  = 12.0, 1 H), 3.00 (dt,  $J$  = 13.5, 7.1 Hz, 1 H), 2.83 (apparent d,  $J$  = 11.2 Hz, 1 H), 2.42 (dd,  $J$  = 12.0, 4.2 Hz, 1 H), 2.18 (apparent t,  $J$  = 11.2 Hz, 1 H), 1.48 (s, 9 H);  $^{13}\text{C}$  NMR (100 MHz,  $\text{CDCl}_3$ ):  $\delta$  [ppm] = 161.9 (d,  $J$  = 245.0 Hz), 155.0, 137.9 (apparent s), 136.4, 129.6 (d,  $J$  = 7.8 Hz), 129.3, 128.4, 127.4, 114.9 (d,  $J$  = 21.0 Hz), 80.2, 63.2, 55.2, 53.4, 52.8, 39.9, 28.6;  $^{19}\text{F}$  NMR (377 MHz,  $\text{CDCl}_3$ ):  $\delta$  [ppm] = –116.3; HRMS (ESI): calculated for  $[\text{C}_{22}\text{H}_{28}\text{FN}_2\text{O}_2]^+$ :  $m/z$  = 371.2129, found:  $m/z$  = 371.2131; IR ( $\text{v}/\text{cm}^{-1}$ , neat): 2976, 2930, 2810, 2768, 1691, 1604, 1509, 1454, 1415, 1365, 1301, 1225, 1171, 1117, 1025, 844, 771.

2-(4-Fluorophenyl)piperazine (**23**)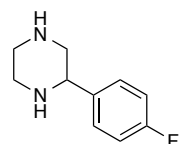

The procedure was modified from the literature.<sup>16</sup> To a stirred solution of **22** (120.0 mg, 0.32 mmol, 1.0 equiv) in 1,2-dichloroethane (1.0 mL) at room temperature was added 1-chloroethylchloroformate (104.8  $\mu\text{L}$ , 0.97 mmol, 3.0 equiv). This reaction was conducted in a closed vial (size: 3 mL). The reaction was heated under reflux overnight and cooled to room temperature before condensed under *vacuo*. The residue was dissolved in MeOH (2 mL) and the mixture was heated under reflux for additional 6 h. The reaction was cooled to room temperature and condensed under *vacuo*. The residue was dissolved in  $\text{CH}_2\text{Cl}_2$  (5 mL) and stirred with sat.  $\text{NaHCO}_{3(\text{aq})}$  (5 mL) at room temperature. After the organic layer was separated, the aqueous layer was extracted with  $\text{CH}_2\text{Cl}_2$  (3×5 mL). The combined organics were washed with brine, dried over  $\text{Na}_2\text{SO}_4$ , filtered, and condensed under *vacuo* to afford the desired product **23** without further purification (a white solid, 57.1 mg, 98%).

**m.p.**: 98–99 °C;  $^1\text{H}$  NMR (400 MHz,  $\text{CDCl}_3$ ):  $\delta$  [ppm] = 7.33 (ddd,  $J$  = 8.6, 5.4, 2.6 Hz, 2 H), 7.01–6.95 (m, 2 H), 3.71 (dd,  $J$  = 10.2, 2.8 Hz, 1 H), 3.10–3.05 (m, 1 H), 2.99–2.91 (m, 3 H), 2.88–2.81 (m, 1 H), 2.64 (dd,  $J$  = 12.1, 10.2 Hz, 1 H), 1.79 (br, 2 H);  $^{13}\text{C}$  NMR (100 MHz,  $\text{CDCl}_3$ ):  $\delta$  [ppm] = 162.2 (d,  $J$  = 245.1 Hz), 138.7 (d,  $J$  = 3.1 Hz), 128.5 (d,  $J$  = 7.9 Hz), 115.3 (d,  $J$  = 21.2 Hz), 61.4, 54.5, 47.9, 46.1;  $^{19}\text{F}$  NMR (377 MHz,  $\text{CDCl}_3$ ):  $\delta$  [ppm] = –115.3; HRMS (ESI): calculated for  $[\text{C}_{10}\text{H}_{14}\text{FN}_2]^+$ :  $m/z$  = 181.1136, found:  $m/z$  = 181.1134; IR ( $\text{v}/\text{cm}^{-1}$ , neat): 3244, 3198, 2939, 2827, 1604, 1510, 1327, 1224, 1155, 1137, 879, 828.

(16) (a) Olofson, R. A.; Martz, J. T.; Senet, J. P.; Piteau, M.; Malfroot, T. *J. Org. Chem.* **1984**, *49*, 2081–2082; (b) Yokoshima, S.; Watanabe, K.; Uehara, F.; Usui, Y.; Tanaka, H. *Bioorg. Med. Chem. Lett.* **2014**, *24*, 5749–5751; (c) Firth, J. D.; O'Brien, P.; Ferris, L. *J. Am. Chem. Soc.* **2016**, *138*, 651–659.

#### 4. X-ray crystallography

Crystals of **18c** (CCDC 1445313) were obtained by recrystallization from Et<sub>2</sub>O/EtOAc. The X-ray data was collected to confirm the relative stereochemistry.

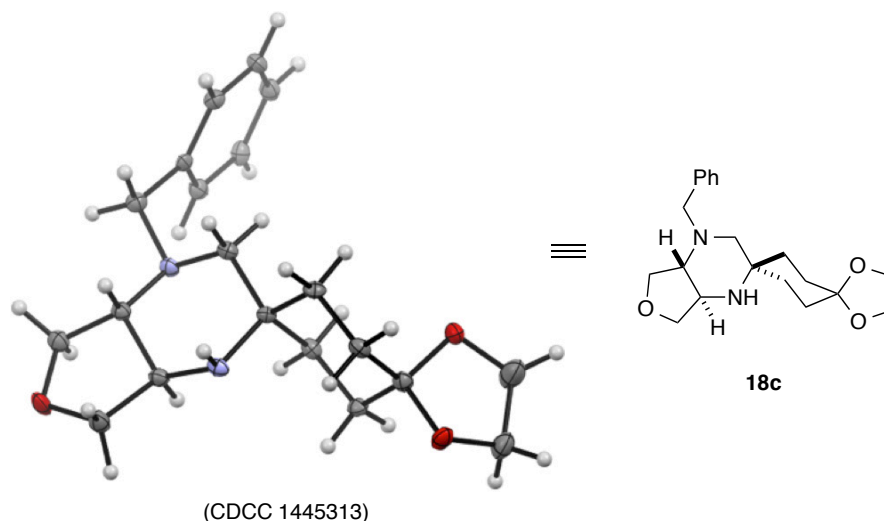

**Figure S2.** ORTEP representation of **18c**. Ellipsoids include 50% of the electron density. We thank Dr. Nils Trapp from the X-ray crystallographic service of the Laboratorium für Organische Chemie at ETH Zürich for performing the experiments.

#### Experimental

A suitable single crystal of **18c** [C<sub>20</sub>H<sub>28</sub>N<sub>2</sub>O<sub>3</sub>, code: mo\_jb141015\_1\_1\_0m] was selected and measured on a Bruker Apex2 Duo (Mo) diffractometer. The crystal was kept at 100.0(2) K during data collection. Using Olex2,<sup>17</sup> the structure was solved with the XT<sup>18</sup> structure solution program using Direct Methods and refined with the XL<sup>19</sup> refinement package using Least Squares minimization.

(17) Dolomanov, O. V.; Bourhis, L. J.; Gildea, R. J.; Howard, J. A. K.; Puschmann, H. *J. Appl. Cryst.* **2009**, *42*, 339–341.

(18) Sheldrick, G. M. *Acta Cryst.* **2015**, *A71*, 3–8.

(19) Sheldrick, G. M. *Acta Cryst.* **2008**, *A64*, 112–122.

**Table S2.** Crystal data and structure refinement for **18c**.

|                                             |                                                                |
|---------------------------------------------|----------------------------------------------------------------|
| Identification code                         | mo_jb141015_1_1_0m                                             |
| Empirical formula                           | C <sub>20</sub> H <sub>28</sub> N <sub>2</sub> O <sub>3</sub>  |
| Formula weight                              | 344.44                                                         |
| Temperature/K                               | 100.0(2)                                                       |
| Crystal system                              | monoclinic                                                     |
| Space group                                 | P2 <sub>1</sub>                                                |
| a/Å                                         | 9.7442(9)                                                      |
| b/Å                                         | 6.1717(5)                                                      |
| c/Å                                         | 14.9524(13)                                                    |
| $\alpha$ /°                                 | 90                                                             |
| $\beta$ /°                                  | 90.609(2)                                                      |
| $\gamma$ /°                                 | 90                                                             |
| Volume/Å <sup>3</sup>                       | 899.16(14)                                                     |
| Z                                           | 2                                                              |
| $\rho_{\text{calc}}$ /g/cm <sup>3</sup>     | 1.272                                                          |
| $\mu$ /mm <sup>-1</sup>                     | 0.085                                                          |
| F(000)                                      | 372.0                                                          |
| Crystal size/mm <sup>3</sup>                | 0.16 × 0.07 × 0.04                                             |
| Radiation                                   | MoK $\alpha$ ( $\lambda$ = 0.71073)                            |
| 2 $\Theta$ range for data collection/°      | 4.18 to 54.974                                                 |
| Index ranges                                | -12 ≤ h ≤ 12, -3 ≤ k ≤ 8, -19 ≤ l ≤ 18                         |
| Reflections collected                       | 5498                                                           |
| Independent reflections                     | 3053 [ $R_{\text{int}}$ = 0.0394, $R_{\text{sigma}}$ = 0.0639] |
| Data/restraints/parameters                  | 3053/2/229                                                     |
| Goodness-of-fit on F <sup>2</sup>           | 1.014                                                          |
| Final R indexes [ $I \geq 2\sigma(I)$ ]     | $R_1$ = 0.0448, $wR_2$ = 0.0886                                |
| Final R indexes [all data]                  | $R_1$ = 0.0662, $wR_2$ = 0.0969                                |
| Largest diff. peak/hole / e Å <sup>-3</sup> | 0.34/-0.26                                                     |
| Flack parameter                             | -0.6(10)                                                       |

**Table S3.** Fractional Atomic Coordinates ( $\times 10^4$ ) and Equivalent Isotropic Displacement Parameters ( $\text{\AA}^2 \times 10^3$ ) for **18c**.  $U_{\text{eq}}$  is defined as 1/3 of the trace of the orthogonalised  $U_{ij}$  tensor.

| Atom | x       | y       | z          | U(eq)   |
|------|---------|---------|------------|---------|
| O1   | -799(2) | 8764(4) | 8856.0(14) | 23.6(5) |
| O2   | 2037(2) | 8208(3) | 3910.2(14) | 21.0(5) |
| O3   | 3664(2) | 5987(4) | 4487.8(14) | 19.1(5) |
| N1   | 469(2)  | 6762(4) | 6701.0(16) | 15.0(6) |
| N2   | 2169(2) | 5437(4) | 8247.7(16) | 15.0(6) |
| C1   | 4607(3) | 1449(5) | 8701.4(19) | 17.3(7) |
| C2   | 6012(3) | 1041(5) | 8685(2)    | 20.5(7) |
| C3   | 6936(3) | 2665(5) | 8901(2)    | 19.9(7) |
| C4   | 6458(3) | 4725(5) | 9118.4(19) | 18.9(7) |
| C5   | 5063(3) | 5121(5) | 9128.8(19) | 17.7(7) |
| C6   | 4120(3) | 3493(5) | 8930.5(19) | 15.1(6) |
| C7   | 2598(3) | 3968(5) | 8976(2)    | 17.3(7) |
| C8   | 755(3)  | 6161(5) | 8349.1(19) | 14.4(6) |
| C9   | 395(3)  | 7538(6) | 9148(2)    | 19.6(7) |
| C10  | -942(3) | 8617(6) | 7890(2)    | 21.1(7) |
| C11  | 415(3)  | 7704(5) | 7588.9(19) | 15.7(6) |

|     |         |         |            |          |
|-----|---------|---------|------------|----------|
| C12 | 2236(3) | 4291(5) | 7383.0(19) | 15.4(6)  |
| C13 | 1810(3) | 5671(5) | 6569.8(19) | 12.6(6)  |
| C14 | 1663(3) | 4163(5) | 5767.8(19) | 15.0(6)  |
| C15 | 1328(3) | 5355(5) | 4898(2)    | 15.9(6)  |
| C16 | 2409(3) | 7038(5) | 4707(2)    | 16.2(7)  |
| C17 | 2611(3) | 8595(5) | 5489.4(19) | 15.5(6)  |
| C18 | 2917(3) | 7379(5) | 6361.6(19) | 15.2(6)  |
| C19 | 4362(4) | 7384(7) | 3893(3)    | 39.1(10) |
| C20 | 3299(3) | 8966(6) | 3539(2)    | 26.7(8)  |

**Table S4.** Anisotropic Displacement Parameters ( $\text{\AA}^2 \times 10^3$ ) for **18c**. The Anisotropic displacement factor exponent takes the form:  $-2\pi^2[h^2a^{*2}U_{11}+2hka^*b^*U_{12}+\dots]$ .

| Atom | $U_{11}$ | $U_{22}$ | $U_{33}$ | $U_{23}$ | $U_{13}$ | $U_{12}$ |
|------|----------|----------|----------|----------|----------|----------|
| O1   | 22.1(12) | 30.7(13) | 17.9(12) | -1.7(11) | 2.8(9)   | 14.8(11) |
| O2   | 18.5(11) | 27.0(13) | 17.3(12) | 8.3(10)  | -0.8(8)  | 2.0(9)   |
| O3   | 16.1(11) | 19.3(11) | 21.9(12) | 1.9(10)  | 5.5(9)   | 3.0(9)   |
| N1   | 11.4(12) | 14.3(13) | 19.1(14) | -1.0(11) | -1(1)    | 1(1)     |
| N2   | 12.3(12) | 17.4(14) | 15.2(13) | 0.7(11)  | -0.1(10) | 4.2(11)  |
| C1   | 19.4(15) | 16.4(16) | 16.0(16) | 2.2(13)  | 0.5(13)  | 2.0(13)  |
| C2   | 23.4(17) | 18.8(16) | 19.4(17) | 1.6(15)  | 6.0(13)  | 9.4(15)  |
| C3   | 16.6(16) | 26.0(17) | 17.1(16) | 1.0(15)  | 1.6(12)  | 5.4(15)  |
| C4   | 19.8(16) | 23.2(16) | 13.6(16) | -0.7(14) | 1.7(13)  | -1.1(14) |
| C5   | 20.9(16) | 19.6(16) | 12.6(16) | -0.4(14) | -1.0(12) | 4.5(14)  |
| C6   | 18.2(15) | 18.8(16) | 8.3(14)  | 3.5(13)  | 0.5(11)  | 6.0(13)  |
| C7   | 17.8(15) | 17.4(16) | 16.6(16) | 1.6(14)  | 0.0(12)  | 1.0(13)  |
| C8   | 12.1(14) | 13.6(14) | 17.4(16) | -0.2(13) | 0.8(11)  | 0.7(13)  |
| C9   | 16.7(15) | 22.4(16) | 19.8(17) | 0.8(15)  | 1.4(12)  | 3.5(14)  |
| C10  | 20.7(16) | 25.7(18) | 16.9(16) | 0.0(15)  | -0.1(12) | 7.9(14)  |
| C11  | 14.2(15) | 13.8(15) | 19.0(17) | 1.2(13)  | 0.1(12)  | 2.2(13)  |
| C12  | 16.0(15) | 13.1(15) | 16.9(16) | -0.3(13) | 0.5(12)  | 2.1(13)  |
| C13  | 12.6(14) | 11.3(15) | 13.9(15) | 0.5(12)  | -0.8(11) | 1.6(12)  |
| C14  | 16.9(15) | 10.1(14) | 18.0(15) | -1.4(13) | -2.1(12) | -0.8(12) |
| C15  | 14.4(15) | 16.5(15) | 16.8(15) | -3.2(13) | -2.4(12) | 2.0(13)  |
| C16  | 14.8(15) | 18.7(17) | 15.2(16) | 0.2(13)  | -0.8(12) | 2.3(13)  |
| C17  | 14.8(15) | 12.0(14) | 19.6(16) | 2.3(14)  | 1.4(12)  | -0.4(13) |
| C18  | 13.5(14) | 15.9(15) | 16.1(16) | -3.2(13) | -0.1(12) | 1.5(13)  |
| C19  | 26.8(19) | 52(3)    | 38(2)    | 22(2)    | 8.3(16)  | 8.8(19)  |
| C20  | 22.6(17) | 34(2)    | 23.7(18) | 9.9(17)  | 3.5(13)  | -1.6(16) |

**Table S5.** Bond Lengths for **18c**.

| Atom | Atom | Length/ $\text{\AA}$ | Atom | Atom | Length/ $\text{\AA}$ |
|------|------|----------------------|------|------|----------------------|
| O1   | C9   | 1.451(3)             | C4   | C5   | 1.382(4)             |
| O1   | C10  | 1.453(4)             | C5   | C6   | 1.391(4)             |
| O2   | C16  | 1.436(4)             | C6   | C7   | 1.514(4)             |
| O2   | C20  | 1.432(4)             | C8   | C9   | 1.510(4)             |
| O3   | C16  | 1.426(3)             | C8   | C11  | 1.517(4)             |
| O3   | C19  | 1.418(4)             | C10  | C11  | 1.511(4)             |
| N1   | C11  | 1.451(4)             | C12  | C13  | 1.538(4)             |
| N1   | C13  | 1.485(3)             | C13  | C14  | 1.524(4)             |

|    |     |          |     |     |          |
|----|-----|----------|-----|-----|----------|
| N2 | C7  | 1.475(4) | C13 | C18 | 1.542(4) |
| N2 | C8  | 1.459(3) | C14 | C15 | 1.526(4) |
| N2 | C12 | 1.476(4) | C15 | C16 | 1.509(4) |
| C1 | C2  | 1.393(4) | C16 | C17 | 1.525(4) |
| C1 | C6  | 1.392(4) | C17 | C18 | 1.531(4) |
| C2 | C3  | 1.383(5) | C19 | C20 | 1.515(5) |
| C3 | C4  | 1.394(4) |     |     |          |

**Table S6.** Bond Angles for **18c**.

| Atom | Atom | Atom | Angle/°  | Atom | Atom | Atom | Angle/°  |
|------|------|------|----------|------|------|------|----------|
| C9   | O1   | C10  | 109.5(2) | N1   | C11  | C10  | 117.5(2) |
| C20  | O2   | C16  | 106.0(2) | C10  | C11  | C8   | 101.3(2) |
| C19  | O3   | C16  | 106.6(2) | N2   | C12  | C13  | 114.4(2) |
| C11  | N1   | C13  | 110.1(2) | N1   | C13  | C12  | 112.1(2) |
| C7   | N2   | C12  | 109.7(2) | N1   | C13  | C14  | 107.8(2) |
| C8   | N2   | C7   | 111.9(2) | N1   | C13  | C18  | 109.6(2) |
| C8   | N2   | C12  | 106.8(2) | C12  | C13  | C18  | 110.8(2) |
| C6   | C1   | C2   | 120.4(3) | C14  | C13  | C12  | 107.8(2) |
| C3   | C2   | C1   | 120.2(3) | C14  | C13  | C18  | 108.6(2) |
| C2   | C3   | C4   | 119.8(3) | C13  | C14  | C15  | 113.2(2) |
| C5   | C4   | C3   | 119.7(3) | C16  | C15  | C14  | 110.5(2) |
| C4   | C5   | C6   | 121.2(3) | O2   | C16  | C15  | 109.5(2) |
| C1   | C6   | C7   | 121.5(3) | O2   | C16  | C17  | 110.4(2) |
| C5   | C6   | C1   | 118.7(3) | O3   | C16  | O2   | 104.3(2) |
| C5   | C6   | C7   | 119.7(3) | O3   | C16  | C15  | 109.4(2) |
| N2   | C7   | C6   | 110.8(2) | O3   | C16  | C17  | 111.0(2) |
| N2   | C8   | C9   | 118.8(2) | C15  | C16  | C17  | 111.9(2) |
| N2   | C8   | C11  | 108.2(2) | C16  | C17  | C18  | 111.6(3) |
| C9   | C8   | C11  | 100.9(2) | C17  | C18  | C13  | 112.1(2) |
| O1   | C9   | C8   | 104.4(2) | O3   | C19  | C20  | 106.3(3) |
| O1   | C10  | C11  | 104.1(2) | O2   | C20  | C19  | 104.0(3) |
| N1   | C11  | C8   | 115.1(3) |      |      |      |          |

**Table S7.** Torsion Angles for **18c**.

| A  | B   | C   | D   | Angle/°   | A   | B   | C   | D   | Angle/°   |
|----|-----|-----|-----|-----------|-----|-----|-----|-----|-----------|
| O1 | C10 | C11 | N1  | 162.0(2)  | C9  | C8  | C11 | C10 | -43.9(3)  |
| O1 | C10 | C11 | C8  | 35.7(3)   | C10 | O1  | C9  | C8  | -14.5(3)  |
| O2 | C16 | C17 | C18 | 176.3(2)  | C11 | N1  | C13 | C12 | 44.7(3)   |
| O3 | C16 | C17 | C18 | -68.5(3)  | C11 | N1  | C13 | C14 | 163.2(2)  |
| O3 | C19 | C20 | O2  | -4.9(4)   | C11 | N1  | C13 | C18 | -78.8(3)  |
| N1 | C13 | C14 | C15 | 62.3(3)   | C11 | C8  | C9  | O1  | 36.2(3)   |
| N1 | C13 | C18 | C17 | -62.8(3)  | C12 | N2  | C7  | C6  | 69.8(3)   |
| N2 | C8  | C9  | O1  | 154.3(2)  | C12 | N2  | C8  | C9  | -175.6(3) |
| N2 | C8  | C11 | N1  | 62.7(3)   | C12 | N2  | C8  | C11 | -61.5(3)  |
| N2 | C8  | C11 | C10 | -169.4(2) | C12 | C13 | C14 | C15 | -176.4(2) |
| N2 | C12 | C13 | N1  | -50.6(3)  | C12 | C13 | C18 | C17 | 173.0(2)  |
| N2 | C12 | C13 | C14 | -169.1(2) | C13 | N1  | C11 | C8  | -52.6(3)  |
| N2 | C12 | C13 | C18 | 72.2(3)   | C13 | N1  | C11 | C10 | -171.9(3) |
| C1 | C2  | C3  | C4  | -1.2(4)   | C13 | C14 | C15 | C16 | 57.0(3)   |

|    |    |     |     |           |     |     |     |     |           |
|----|----|-----|-----|-----------|-----|-----|-----|-----|-----------|
| C1 | C6 | C7  | N2  | -110.9(3) | C14 | C13 | C18 | C17 | 54.7(3)   |
| C2 | C1 | C6  | C5  | 1.0(4)    | C14 | C15 | C16 | O2  | -177.2(2) |
| C2 | C1 | C6  | C7  | -178.4(3) | C14 | C15 | C16 | O3  | 69.0(3)   |
| C2 | C3 | C4  | C5  | 0.9(4)    | C14 | C15 | C16 | C17 | -54.4(3)  |
| C3 | C4 | C5  | C6  | 0.4(4)    | C15 | C16 | C17 | C18 | 54.1(3)   |
| C4 | C5 | C6  | C1  | -1.3(4)   | C16 | O2  | C20 | C19 | 25.0(3)   |
| C4 | C5 | C6  | C7  | 178.1(3)  | C16 | O3  | C19 | C20 | -17.3(4)  |
| C5 | C6 | C7  | N2  | 69.7(3)   | C16 | C17 | C18 | C13 | -54.6(3)  |
| C6 | C1 | C2  | C3  | 0.3(4)    | C18 | C13 | C14 | C15 | -56.3(3)  |
| C7 | N2 | C8  | C9  | 64.4(3)   | C19 | O3  | C16 | O2  | 33.0(3)   |
| C7 | N2 | C8  | C11 | 178.5(2)  | C19 | O3  | C16 | C15 | 150.1(3)  |
| C7 | N2 | C12 | C13 | -180.0(2) | C19 | O3  | C16 | C17 | -86.0(3)  |
| C8 | N2 | C7  | C6  | -172.0(2) | C20 | O2  | C16 | O3  | -36.3(3)  |
| C8 | N2 | C12 | C13 | 58.7(3)   | C20 | O2  | C16 | C15 | -153.3(3) |
| C9 | O1 | C10 | C11 | -13.5(3)  | C20 | O2  | C16 | C17 | 83.0(3)   |
| C9 | C8 | C11 | N1  | -171.8(2) |     |     |     |     |           |

**Table S8.** Hydrogen Atom Coordinates ( $\text{\AA} \times 10^4$ ) and Isotropic Displacement Parameters ( $\text{\AA}^2 \times 10^3$ ) for **18c**.

| Atom | x        | y        | z        | U(eq) |
|------|----------|----------|----------|-------|
| H1   | -200(30) | 5760(40) | 6626(19) | 18    |
| H1A  | 3977     | 326      | 8555     | 21    |
| H2   | 6337     | -356     | 8526     | 25    |
| H3   | 7894     | 2377     | 8901     | 24    |
| H4   | 7088     | 5851     | 9259     | 23    |
| H5   | 4741     | 6530     | 9274     | 21    |
| H7A  | 2077     | 2595     | 8929     | 21    |
| H7B  | 2387     | 4640     | 9560     | 21    |
| H8   | 126      | 4882     | 8319     | 17    |
| H9A  | 175      | 6621     | 9670     | 24    |
| H9B  | 1162     | 8518     | 9310     | 24    |
| H10A | -1109    | 10064    | 7623     | 25    |
| H10B | -1709    | 7642     | 7720     | 25    |
| H11  | 1101     | 8908     | 7613     | 19    |
| H12A | 1632     | 3003     | 7408     | 18    |
| H12B | 3186     | 3773     | 7296     | 18    |
| H14A | 926      | 3101     | 5888     | 18    |
| H14B | 2529     | 3349     | 5694     | 18    |
| H15A | 1281     | 4304     | 4399     | 19    |
| H15B | 421      | 6065     | 4946     | 19    |
| H17A | 1773     | 9479     | 5562     | 19    |
| H17B | 3381     | 9588     | 5359     | 19    |
| H18A | 2971     | 8432     | 6860     | 18    |
| H18B | 3820     | 6654     | 6317     | 18    |
| H19A | 4765     | 6546     | 3396     | 47    |
| H19B | 5108     | 8166     | 4211     | 47    |
| H20A | 3505     | 10459    | 3741     | 32    |
| H20B | 3260     | 8941     | 2877     | 32    |

## 5. NMR spectra

## Table of contents

|                                                                                                                                                                                    |    |
|------------------------------------------------------------------------------------------------------------------------------------------------------------------------------------|----|
| 2-(2-(Phenylamino)ethyl)isoindoline-1,3-dione ( <b>S1</b> ) .....                                                                                                                  | 36 |
| 2-(2-(Phenyl((trimethylsilyl)methyl)amino)ethyl)isoindoline-1,3-dione ( <b>S2</b> ) .....                                                                                          | 37 |
| <i>N</i> <sup>1</sup> -phenyl- <i>N</i> <sup>1</sup> -((trimethylsilyl)methyl)ethane-1,2-diamine ( <b>2</b> ) .....                                                                | 38 |
| 2-(2-(Benzyl((trimethylsilyl)methyl)amino)ethyl)isoindoline-1,3-dione ( <b>S3</b> ) .....                                                                                          | 39 |
| <i>N</i> <sup>1</sup> -benzyl- <i>N</i> <sup>1</sup> -((trimethylsilyl)methyl)ethane-1,2-diamine ( <b>3</b> ) .....                                                                | 40 |
| ( <i>S</i> )- <i>tert</i> -Butyl (1-(benzyl((trimethylsilyl)methyl)amino)-1-oxopropan-2-yl)carbamate ( <b>S4</b> ) .....                                                           | 41 |
| ( <i>S</i> )-2-Amino- <i>N</i> -benzyl- <i>N</i> -((trimethylsilyl)methyl)propanamide ( <b>S5</b> ) .....                                                                          | 42 |
| ( <i>S</i> )- <i>N</i> <sup>1</sup> -Benzyl- <i>N</i> <sup>1</sup> -((trimethylsilyl)methyl)propane-1,2-diamine ( <b>10</b> ) .....                                                | 43 |
| 1-(( <i>tert</i> -Butoxycarbonyl)amino)cyclohexanecarboxylic acid ( <b>S6</b> ) .....                                                                                              | 44 |
| <i>tert</i> -Butyl (1-(benzyl((trimethylsilyl)methyl)carbamoyl)cyclohexyl)carbamate ( <b>S7</b> ) .....                                                                            | 45 |
| 1-Amino- <i>N</i> -benzyl- <i>N</i> -((trimethylsilyl)methyl)cyclohexanecarboxamide ( <b>S8</b> ) .....                                                                            | 46 |
| 1-((Benzyl((trimethylsilyl)methyl)amino)methyl)cyclohexanamine ( <b>11</b> ) .....                                                                                                 | 47 |
| <i>trans</i> -4-(((Trimethylsilyl)methyl)amino)tetrahydrofuran-3-ol ( <b>S9</b> ) .....                                                                                            | 48 |
| <i>trans</i> -4-(Benzyl((trimethylsilyl)methyl)amino)tetrahydrofuran-3-ol ( <b>S10</b> ) .....                                                                                     | 49 |
| 2-( <i>trans</i> -4-(Benzyl((trimethylsilyl)methyl)amino)tetrahydrofuran-3-yl)isoindoline-1,3-dione ( <b>S11</b> ) .....                                                           | 50 |
| <i>trans</i> - <i>N</i> <sup>3</sup> -Benzyl- <i>N</i> <sup>3</sup> -((trimethylsilyl)methyl)tetrahydrofuran-3,4-diamine ( <b>12</b> ) .....                                       | 51 |
| 2-( <i>trans</i> -2-Aminocyclohexyl)isoindoline-1,3-dione ( <b>S12</b> ) .....                                                                                                     | 52 |
| 2-( <i>trans</i> -2-(Benzylideneamino)cyclohexyl)isoindoline-1,3-dione ( <b>S13</b> ) .....                                                                                        | 53 |
| 2-( <i>trans</i> -2-(Benzylamino)cyclohexyl)isoindoline-1,3-dione ( <b>S14</b> ) .....                                                                                             | 54 |
| 2-( <i>trans</i> -2-(Benzyl((trimethylsilyl)methyl)amino)cyclohexyl)isoindoline-1,3-dione ( <b>S15</b> ) .....                                                                     | 55 |
| <i>trans</i> - <i>N</i> <sup>1</sup> -Benzyl- <i>N</i> <sup>1</sup> -((trimethylsilyl)methyl)cyclohexane-1,2-diamine ( <b>13</b> ) .....                                           | 56 |
| ( <i>S</i> )-1-((Trimethylsilyl)methyl)pyrrolidine-2-carboxamide ( <b>S16</b> ) .....                                                                                              | 57 |
| ( <i>S</i> )-1-((Trimethylsilyl)methyl)pyrrolidin-2-yl)methanamine ( <b>14</b> ) .....                                                                                             | 58 |
| 2,2,2-Trifluoro- <i>N</i> -(piperidin-2-ylmethyl)acetamide ( <b>S17</b> ) .....                                                                                                    | 59 |
| 2,2,2-Trifluoro- <i>N</i> -((1-((trimethylsilyl)methyl)piperidin-2-yl)methyl)acetamide ( <b>S18</b> ) .....                                                                        | 60 |
| 1-((Trimethylsilyl)methyl)piperidin-2-yl)methanamine ( <b>15</b> ) .....                                                                                                           | 61 |
| 3-(4-Fluorophenyl)-1-phenylpiperazine ( <b>8</b> ) (Table 1, entry 3) .....                                                                                                        | 62 |
| 1-Benzyl-3-(4-fluorophenyl)piperazine ( <b>9a</b> ) (Table 1, entry 5–7 & Scheme 2) .....                                                                                          | 63 |
| Methyl 3-(4-benzylpiperazin-2-yl)benzoate ( <b>9b</b> ) (Scheme 2) .....                                                                                                           | 64 |
| 1-Benzyl-3-( <i>o</i> -tolyl)piperazine ( <b>9c</b> ) (Scheme 2) .....                                                                                                             | 65 |
| 1-Benzyl-3-(3-methoxyphenyl)piperazine ( <b>9d</b> ) (Scheme 2) .....                                                                                                              | 66 |
| 1-Benzyl-3-cyclopropylpiperazine ( <b>9e</b> ) (Scheme 2) .....                                                                                                                    | 67 |
| 1-Benzyl-3-isobutylpiperazine ( <b>9f</b> ) (Scheme 2) .....                                                                                                                       | 68 |
| 4-Benzyl-9-oxa-1,4-diazaspiro[5.5]undecane ( <b>9g</b> ) (Scheme 2) .....                                                                                                          | 69 |
| 1-Benzyl-3-(pyridin-2-yl)piperazine ( <b>9h</b> ) (Scheme 2) .....                                                                                                                 | 70 |
| 1-Benzyl-3-(1-benzyl-1 <i>H</i> -imidazol-5-yl)piperazine ( <b>9i</b> ) (Scheme 2) .....                                                                                           | 71 |
| <i>N</i> -(4-((2 <i>R</i> ,6 <i>S</i> )-4-Benzyl-6-methylpiperazin-2-yl)phenyl)acetamide ( <b>16a</b> ) (Scheme 3) .....                                                           | 72 |
| NOESY of <i>N</i> -(4-((2 <i>R</i> ,6 <i>S</i> )-4-Benzyl-6-methylpiperazin-2-yl)phenyl)acetamide ( <b>16a</b> ) .....                                                             | 73 |
| (3 <i>S</i> ,5 <i>S</i> )-1-Benzyl-3-(6-bromopyridin-2-yl)-5-methylpiperazine ( <b>16b</b> ) (Scheme 3) .....                                                                      | 74 |
| 4-((2 <i>S</i> ,6 <i>S</i> )-4-Benzyl-6-methylpiperazin-2-yl)oxazole ( <b>16c</b> ) (Scheme 3) .....                                                                               | 75 |
| 5-(4-Benzyl-1,4-diazaspiro[5.5]undecan-2-yl)-2-fluorobenzonitrile ( <b>17a</b> ) (Scheme 3) .....                                                                                  | 76 |
| 2-(4-Benzyl-1,4-diazaspiro[5.5]undecan-2-yl)thiazole ( <b>17b</b> ) (Scheme 3) .....                                                                                               | 77 |
| 5-(4-Benzyl-1,4-diazaspiro[5.5]undecan-2-yl)-3-phenylisoxazole ( <b>17c</b> ) (Scheme 3) .....                                                                                     | 78 |
| ( <i>trans</i> , <i>cis</i> )-1-Benzyl-3-(3-bromophenyl)octahydrofuro[3,4- <i>b</i> ]pyrazine ( <b>18a</b> ) (Scheme 3) .....                                                      | 79 |
| ( <i>trans</i> , <i>cis</i> )-1-Benzyl-3-(5-methylisoxazol-3-yl)octahydrofuro[3,4- <i>b</i> ]pyrazine ( <b>18b</b> ) (Scheme 3) .....                                              | 80 |
| NOESY of ( <i>trans</i> , <i>cis</i> )-1-benzyl-3-(5-methylisoxazol-3-yl)octahydrofuro[3,4- <i>b</i> ]pyrazine ( <b>18b</b> ) .....                                                | 81 |
| ( <i>trans</i> )-4'-Benzylhexahydro-1' <i>H</i> -spiro[cyclohexane-1,2'-furo[3,4- <i>b</i> ]pyrazin]-4-one ethylene ketal ( <b>18c</b> ) (Scheme 3) .....                          | 82 |
| ( <i>trans</i> , <i>cis</i> )-3-(Benzo[ <i>d</i> ][1,3]dioxol-5-yl)-1-benzyldecahydroquinoxaline ( <b>19a</b> ) (Scheme 3) .....                                                   | 83 |
| NOESY of ( <i>trans</i> , <i>cis</i> )-3-(benzo[ <i>d</i> ][1,3]dioxol-5-yl)-1-benzyldecahydroquinoxaline ( <b>19a</b> ) .....                                                     | 84 |
| ( <i>trans</i> , <i>cis</i> )-1-Benzyl-3-(1-methyl-1 <i>H</i> -benzo[ <i>d</i> ]imidazol-2-yl)decahydroquinoxaline ( <b>19b</b> ) (Scheme 3) .....                                 | 85 |
| ( <i>trans</i> , <i>cis</i> )-1-Benzyl-3-(2-methylprop-1-en-1-yl)decahydroquinoxaline ( <b>19c</b> ) (Scheme 3) .....                                                              | 86 |
| (3 <i>R</i> ,8 <i>aS</i> )-3-(2-Chloro-4-fluorophenyl)octahydropyrrolo[1,2- <i>a</i> ]pyrazine ( <b>20a</b> ) (Scheme 3) .....                                                     | 87 |
| (3 <i>R</i> ,8 <i>aS</i> )-3-(5-Methyl-1-phenyl-1 <i>H</i> -pyrazol-4-yl)octahydropyrrolo[1,2- <i>a</i> ]pyrazine ( <b>20b</b> ) (Scheme 3) .....                                  | 88 |
| ( <i>R</i> )- <i>tert</i> -Butyl 2,2-dimethyl-4-((3 <i>S</i> ,8 <i>aS</i> )-octahydropyrrolo[1,2- <i>a</i> ]pyrazin-3-yl)oxazolidine-3-carboxylate ( <b>20c</b> ) (Scheme 3) ..... | 89 |
| <i>cis</i> -3-Mesityloctahydro-1 <i>H</i> -pyrido[1,2- <i>a</i> ]pyrazine ( <b>21a</b> ) (Scheme 3) .....                                                                          | 90 |
| <i>cis</i> -3-(Pyrimidin-2-yl)octahydro-1 <i>H</i> -pyrido[1,2- <i>a</i> ]pyrazine ( <b>21b</b> ) (Scheme 3) .....                                                                 | 91 |
| NOESY of <i>cis</i> -3-(pyrimidin-2-yl)octahydro-1 <i>H</i> -pyrido[1,2- <i>a</i> ]pyrazine ( <b>21b</b> ) .....                                                                   | 92 |
| <i>tert</i> -Butyl octahydrospiro[azetidine-3,3'-pyrido[1,2- <i>a</i> ]pyrazine]-1-carboxylate ( <b>21c</b> ) (Scheme 3) .....                                                     | 93 |
| <i>tert</i> -Butyl 4-benzyl-2-(4-fluorophenyl)piperazine-1-carboxylate ( <b>22</b> ) .....                                                                                         | 94 |
| 2-(4-Fluorophenyl)piperazine ( <b>23</b> ) .....                                                                                                                                   | 95 |

## 2-(2-(Phenylamino)ethyl)isoindoline-1,3-dione (S1)

57-24-03-bhsieh.10.fid  
Sample fly-09-088  
group bode  
PRO CDCl<sub>3</sub> /opt/v bhsieh 57

<sup>1</sup>H NMR (400 MHz, CDCl<sub>3</sub>) δ 7.86, 7.86, 7.85, 7.84, 7.83, 7.83, 7.82, 7.81, 7.73, 7.73, 7.72, 7.71, 7.71, 7.70, 7.69, 7.69, 7.69, 7.17, 7.16, 7.16, 7.15, 7.15, 7.14, 7.14, 7.14, 7.13, 7.13, 7.12, 7.12, 6.69, 6.69, 6.68, 6.67, 6.67, 6.66, 6.65, 6.65, 6.64, 6.64, 6.63, 6.63, 6.62, 6.62, 6.61, 4.03, 3.98, 3.97, 3.95, 3.45, 3.44, 3.42.

<sup>1</sup>H NMR (400 MHz, Chloroform-*d*) δ 7.84 (dd, *J* = 5.5, 3.0 Hz, 2 H), 7.71 (dd, *J* = 5.5, 3.0 Hz, 2 H), 7.17–7.12 (m, 2 H), 6.69–6.61 (m, 3 H), 4.03 (br, 1 H), 3.97 (t, *J* = 6.1 Hz, 2 H), 3.44 (t, *J* = 6.1 Hz, 2 H).

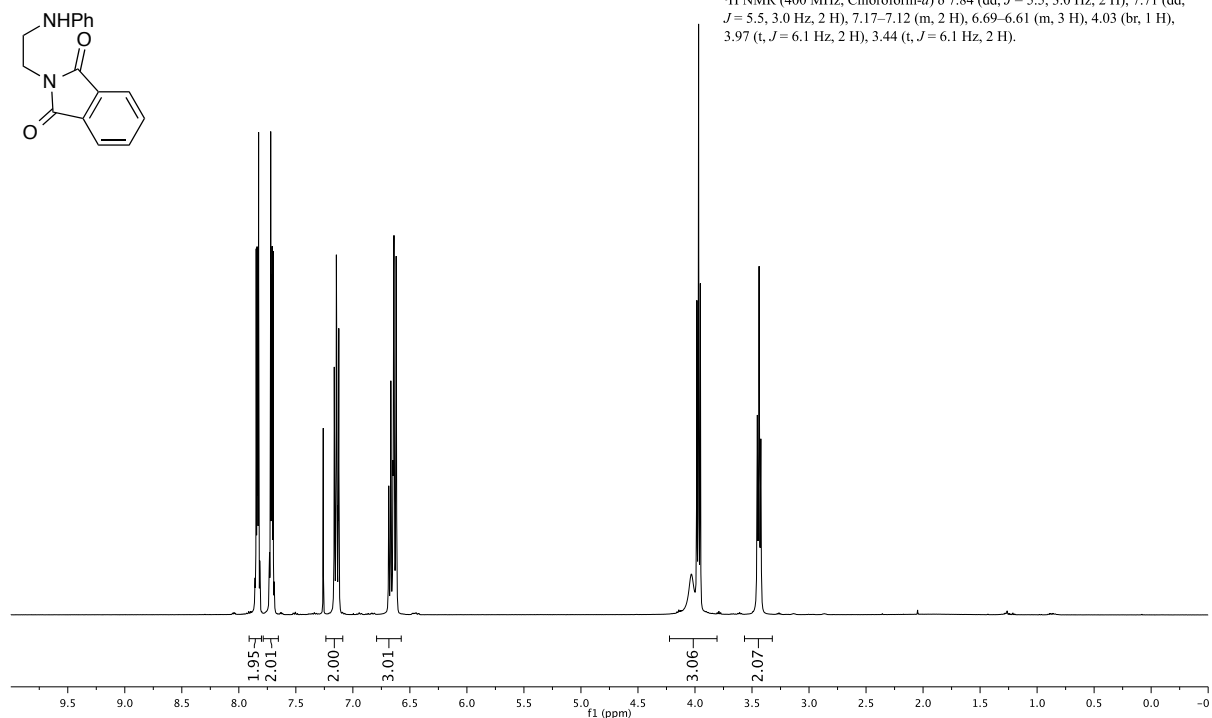

57-24-03-bhsieh.11.fid  
Sample fly-09-088  
group bode  
CAR CDCl<sub>3</sub> /opt/v bhsieh 57

168.7, 147.7, 134.2, 132.1, 129.4, 123.5, 117.7, 112.8, 43.1, 37.6

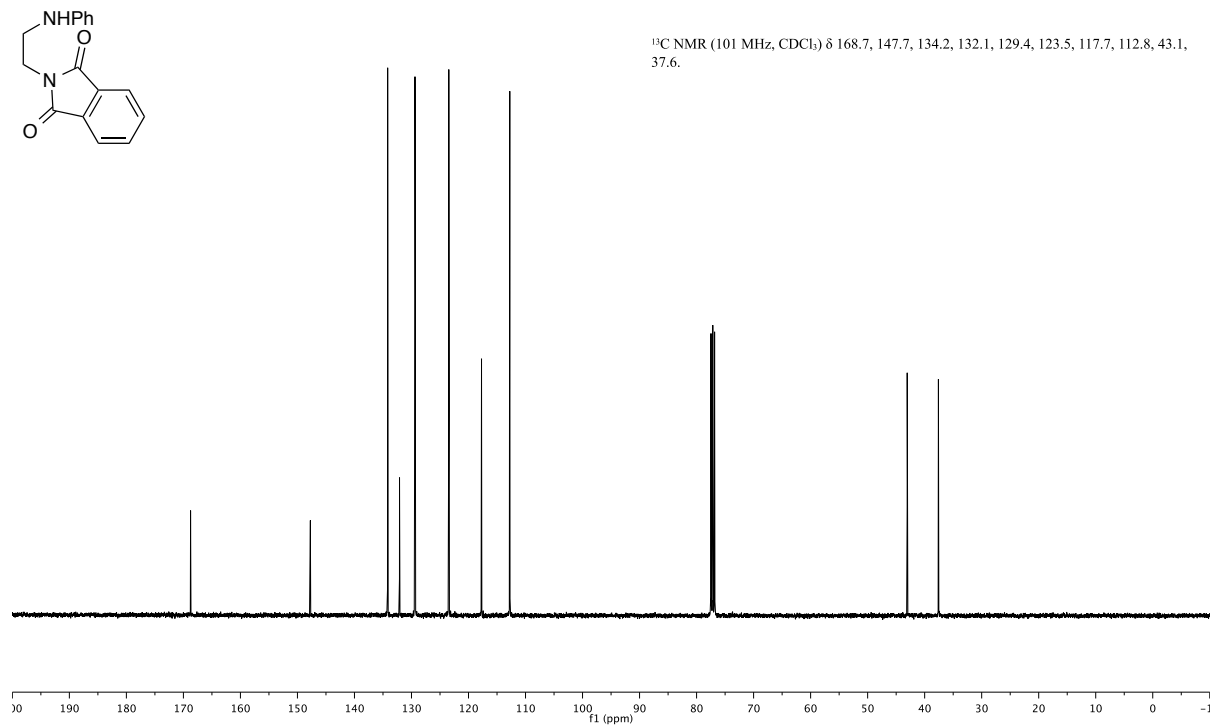



**2-(2-(Phenyl((trimethylsilyl)methyl)amino)ethyl)isoindoline-1,3-dione (S2)**

41-27-10-bhsieh.10.fid  
Sample fly-10-037  
group bode

<sup>1</sup>H NMR (400 MHz, CDCl<sub>3</sub>) δ 7.83, 7.82, 7.81, 7.81, 7.80, 7.79, 7.78, 7.78, 7.71, 7.71, 7.70, 7.69, 7.68, 7.67, 7.67, 7.17, 7.17, 7.17, 7.16, 7.16, 7.15, 7.15, 7.14, 7.13, 7.13, 7.12, 6.80, 6.78, 6.57, 6.55, 6.53, 3.90, 3.89, 3.88, 3.88, 3.88, 3.87, 3.86, 3.61, 3.60, 3.60, 3.59, 3.57, 2.93, 0.11.

<sup>1</sup>H NMR (400 MHz, Chloroform-*d*) δ 7.80 (dd, *J* = 5.5, 3.0 Hz, 2 H), 7.68 (dd, *J* = 5.5, 3.0 Hz, 2 H), 7.18–7.12 (m, 2 H), 6.79 (apparent d, *J* = 7.9 Hz, 2 H), 6.55 (apparent t, *J* = 7.2 Hz, 1 H), 3.90–3.86 (m, 2 H), 3.61–3.57 (m, 2 H), 2.93 (s, 2 H), 0.11 (s, 9 H).

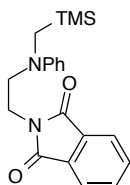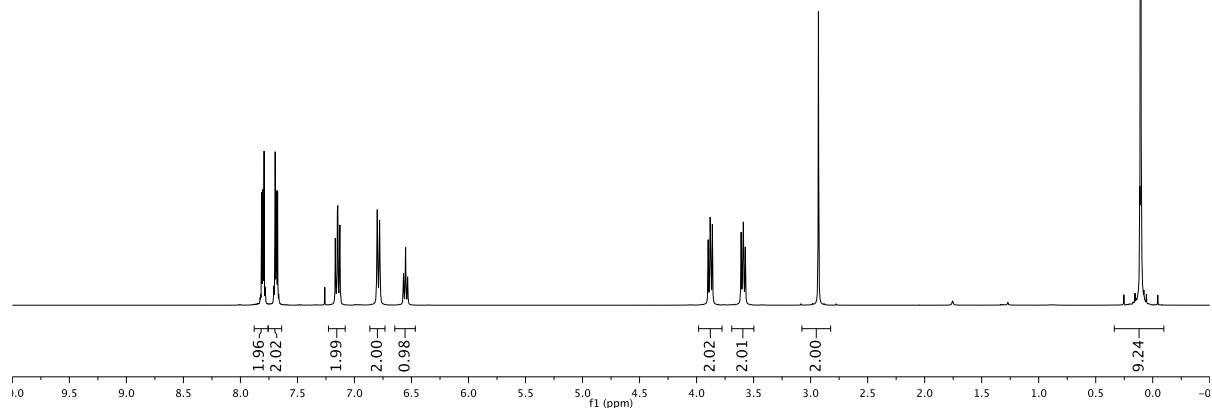

41-27-10-bhsieh.11.fid  
Sample fly-10-037  
group bode

168.3 148.8 134.0 132.1 129.1 123.2 115.7 112.4 50.0 41.7 33.9 -1.1

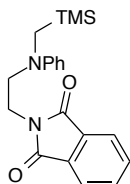

<sup>13</sup>C NMR (101 MHz, CDCl<sub>3</sub>) δ 168.3, 148.8, 134.0, 132.1, 129.1, 123.2, 115.7, 112.4, 50.0, 41.7, 33.9, -1.1.

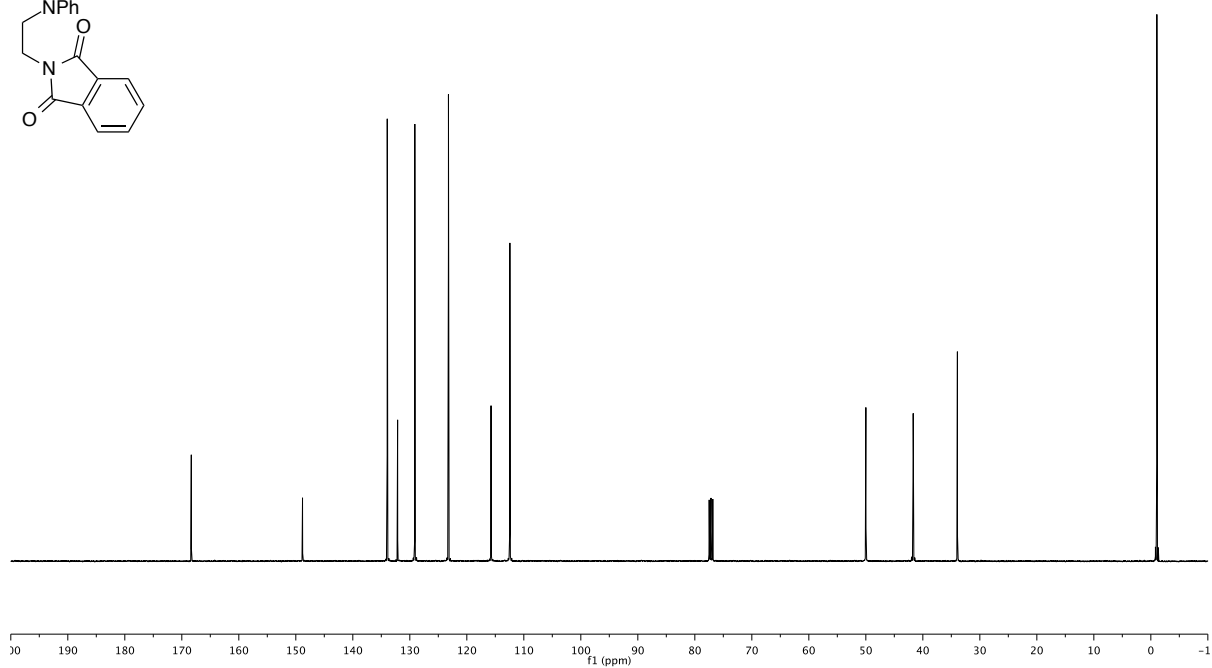

***N*<sup>1</sup>-phenyl-*N*<sup>1</sup>-((trimethylsilyl)methyl)ethane-1,2-diamine (2)**

21-13-06-bhsieh.10.fid  
Sample fly-10-038  
group bode

<sup>1</sup>H NMR (400 MHz, CDCl<sub>3</sub>) δ 7.22, 7.21, 7.21, 7.21, 7.20, 7.19, 7.19, 7.18, 7.18, 7.17, 7.17, 6.70, 6.70, 6.69, 6.69, 6.68, 6.68, 6.68, 6.65, 6.65, 6.64, 6.63, 6.63, 6.62, 6.61, 6.61, 6.61, 3.39, 3.37, 3.35, 2.93, 2.91, 2.90, 2.89, 1.14, 0.08.

<sup>1</sup>H NMR (400 MHz, Chloroform-*d*) δ 7.22–7.17 (m, 2 H), 6.69 (dt, *J* = 7.8, 1.0 Hz, 2 H), 6.63 (tt, *J* = 7.1, 1.0 Hz, 1 H), 3.37 (t, *J* = 6.9 Hz, 2 H), 2.91 (t, *J* = 6.9 Hz, 2 H), 2.90 (s, 2 H), 1.14 (br, 2 H), 0.08 (s, 9 H).

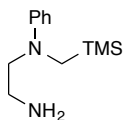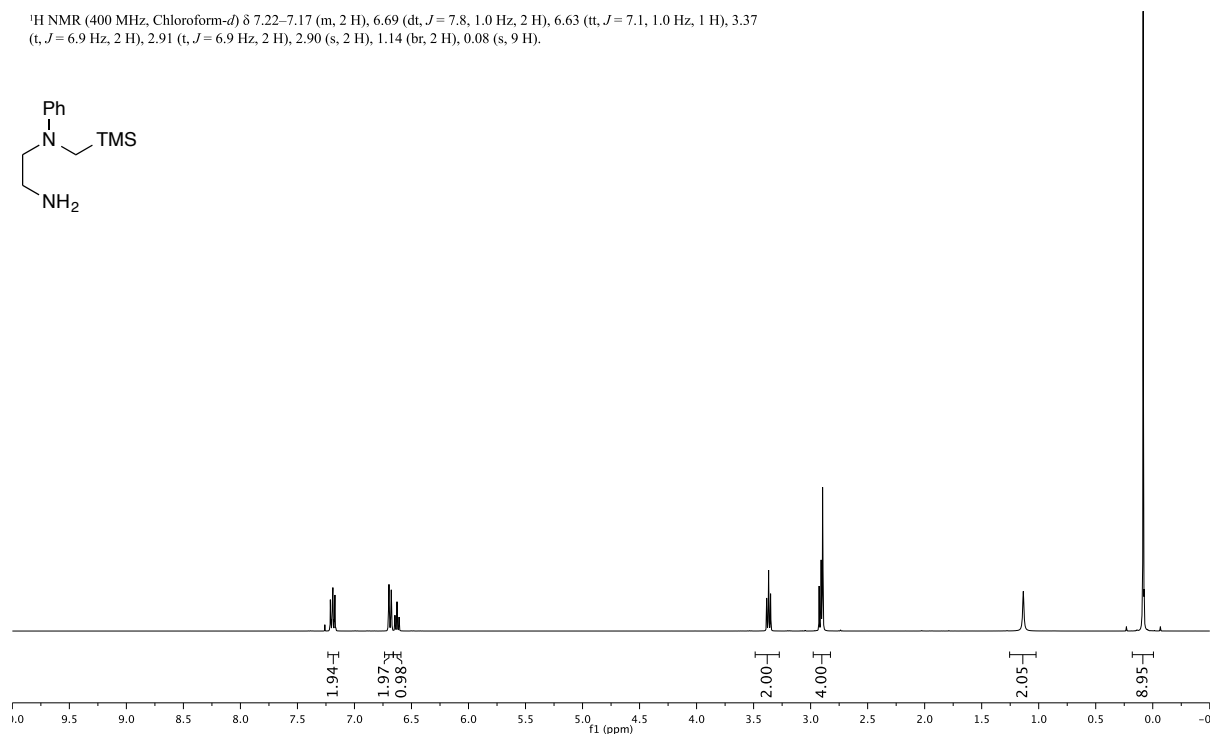

21-13-06-bhsieh.11.fid  
Sample fly-10-038  
group bode

149.4 129.0 115.4 112.4 55.9 42.5 38.9 -0.9

<sup>13</sup>C NMR (101 MHz, CDCl<sub>3</sub>) δ 149.4, 129.0, 115.4, 112.4, 55.9, 42.5, 38.9, -0.9.

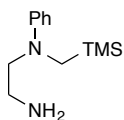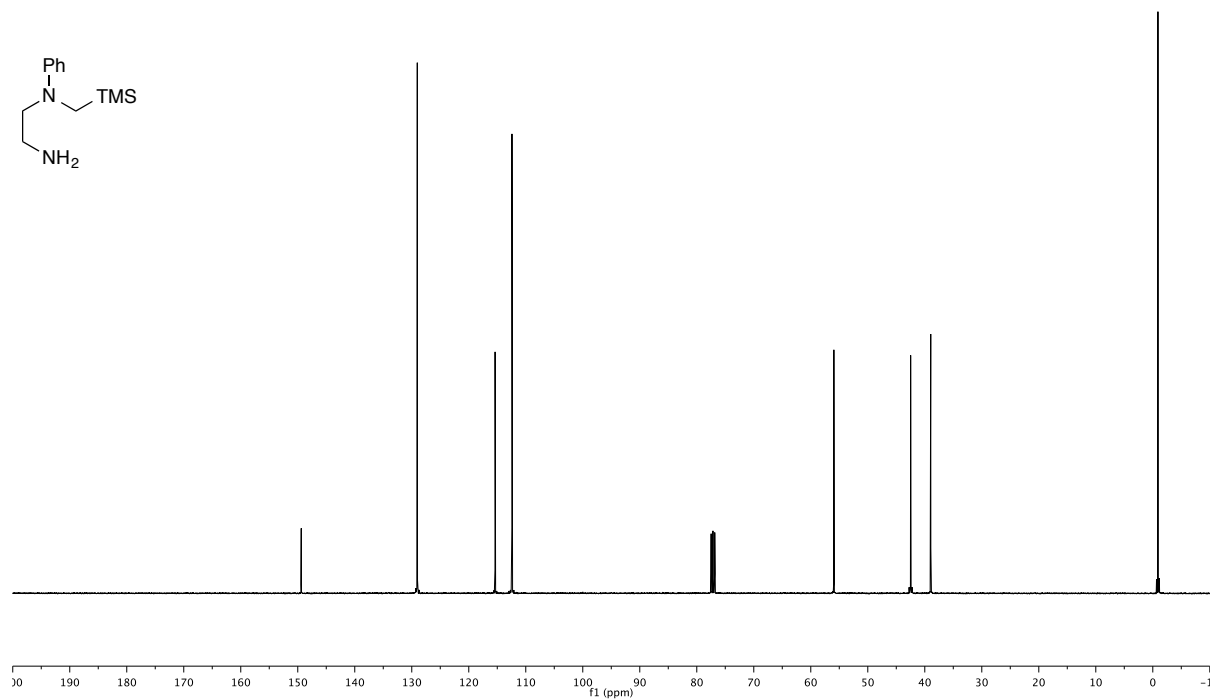

## 2-(2-(Benzyl((trimethylsilyl)methyl)amino)ethyl)isoindoline-1,3-dione (S3)

41-17-10-bhsieh.10.fid  
Sample fly-10-129  
group bode

$^1\text{H}$  NMR (400 MHz,  $\text{CDCl}_3$ )  $\delta$  7.82, 7.82, 7.81, 7.80, 7.72, 7.71, 7.70, 7.69, 7.17, 7.17, 7.16, 7.16, 7.15, 7.15, 7.14, 7.13, 7.13, 7.12, 7.12, 7.12, 7.11, 7.11, 7.10, 7.09, 3.79, 3.77, 3.75, 3.54, 2.62, 2.60, 2.58, 2.09, 0.03.

$^1\text{H}$  NMR (400 MHz, Chloroform-*d*)  $\delta$  7.81 (dd,  $J = 5.5, 3.0$  Hz, 2 H), 7.71 (dd,  $J = 5.5, 3.0$  Hz, 2 H), 7.17–7.09 (m, 5 H), 3.77 (t,  $J = 6.3$  Hz, 2 H), 3.54 (s, 2 H), 2.60 (t,  $J = 6.3$  Hz, 2 H), 2.09 (s, 2 H), 0.03 (s, 9 H).

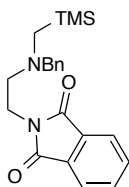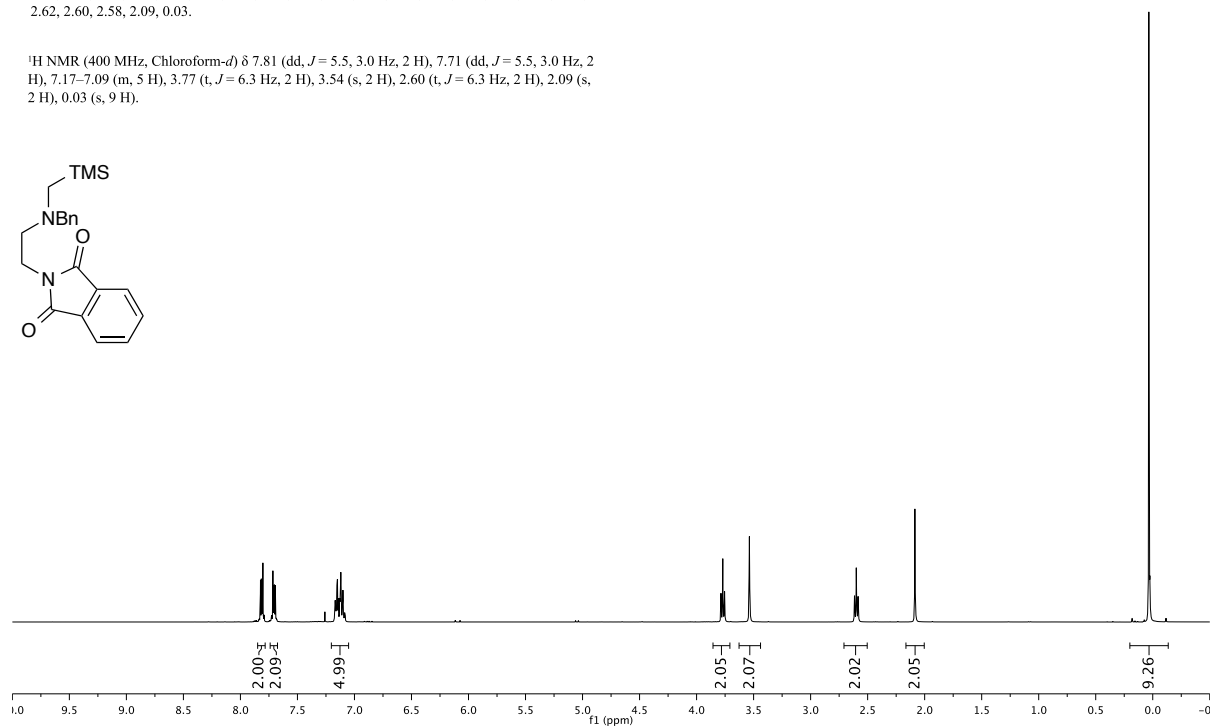

41-17-10-bhsieh.11.fid  
Sample fly-10-129  
group bode

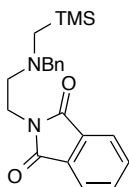

$^{13}\text{C}$  NMR (101 MHz,  $\text{CDCl}_3$ )  $\delta$  168.2, 139.8, 133.8, 132.4, 128.8, 128.1, 126.8, 123.1, 61.9, 54.9, 46.3, 36.0, -1.2.

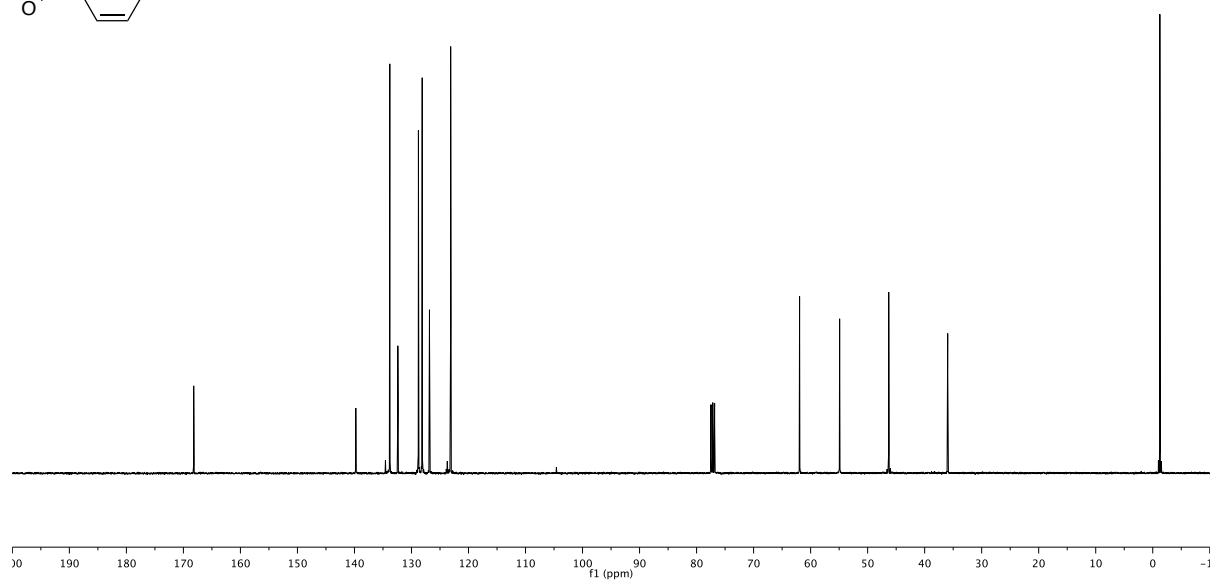

***N*<sup>1</sup>-benzyl-*N*<sup>1</sup>-((trimethylsilyl)methyl)ethane-1,2-diamine (3)**

5-20-08-bhsieh.10.fid  
Sample fly-10-151  
group bode  
PRO CDCl<sub>3</sub> /opt/v bhsieh 5

<sup>1</sup>H NMR (400 MHz, CDCl<sub>3</sub>) δ 7.35, 7.35, 7.34, 7.33, 7.32, 7.32, 7.32, 7.31, 7.30, 7.30, 7.28, 7.27, 7.26, 7.26, 7.25, 7.25, 7.24, 7.24, 7.23, 7.23, 3.53, 2.74, 2.72, 2.71, 2.40, 2.39, 2.38, 2.00, 1.30, 0.10.

<sup>1</sup>H NMR (400 MHz, Chloroform-*d*) δ 7.35–7.23 (m, 5 H), 3.53 (s, 2 H), 2.72 (t, *J* = 5.9 Hz, 2 H), 2.39 (t, *J* = 5.9 Hz, 2 H), 2.00 (s, 2 H), 1.30 (br, 2 H), 0.10 (s, 9 H).

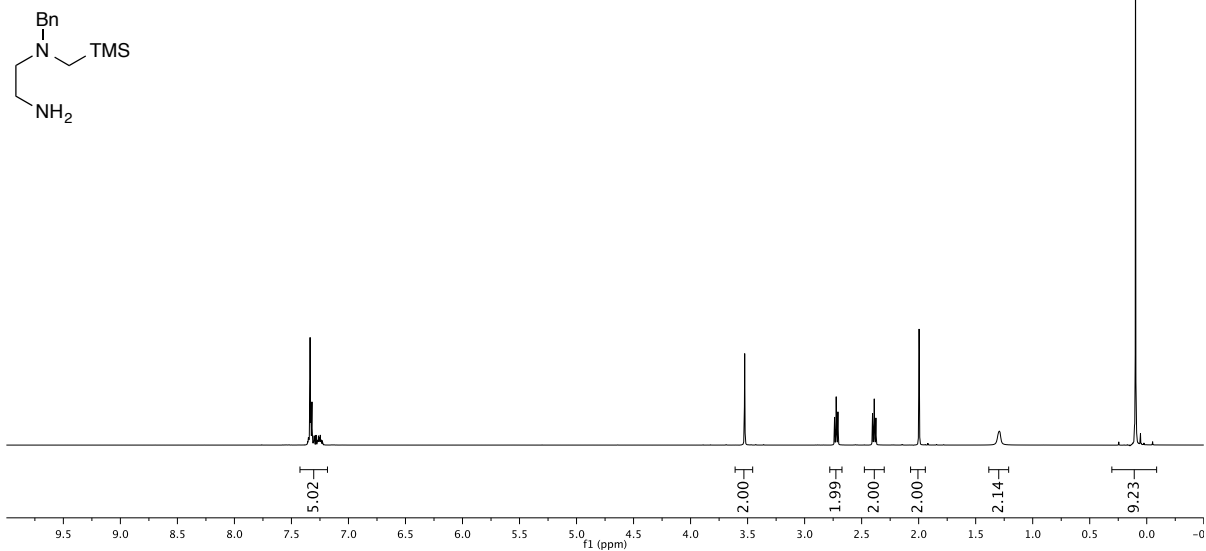

5-20-08-bhsieh.11.fid  
Sample fly-10-151  
group bode  
CAR CDCl<sub>3</sub> /opt/v bhsieh 5

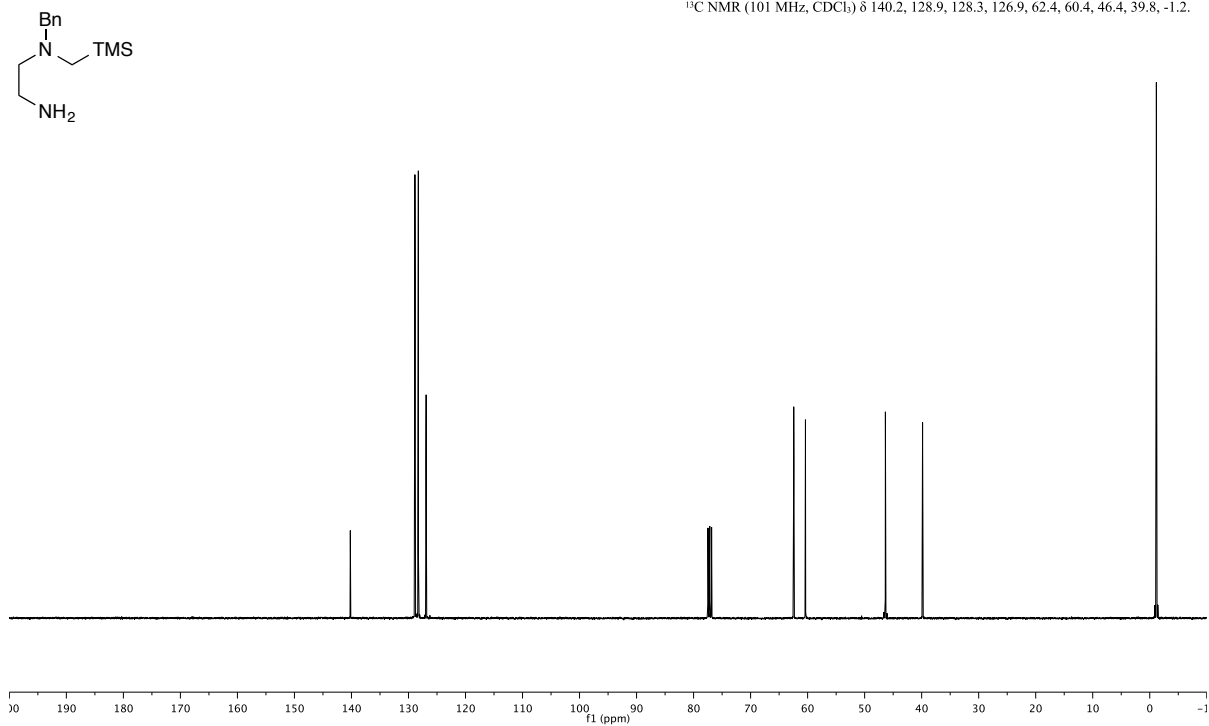

**(*S*)-tert-Butyl (1-(benzyl((trimethylsilyl)methyl)amino)-1-oxopropan-2-yl)carbamate (S4)**

54-17-10-bhsieh.10.fid  
Sample fly-10-095  
group bode  
PRO CDCl<sub>3</sub> /opt/v bhsieh 54

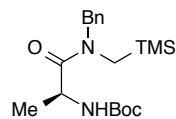

<sup>1</sup>H NMR (400 MHz, CDCl<sub>3</sub>) δ 7.38, 7.37, 7.37, 7.36, 7.35, 7.34, 7.32, 7.32, 7.31, 7.31, 7.30, 7.29, 7.28, 7.28, 7.27, 7.26, 7.20, 7.19, 7.18, 7.15, 7.15, 5.58, 5.55, 5.45, 5.43, 5.05, 5.01, 4.72, 4.70, 4.68, 4.67, 4.66, 4.65, 4.64, 4.59, 4.55, 4.21, 4.17, 2.87, 2.83, 1.45, 1.43, 1.37, 1.35, 1.28, 1.26, 0.13, 0.06.

The ratio of rotamers was 75:25 as determined by H NMR at RT.

<sup>1</sup>H NMR (400 MHz, Chloroform-*d*) δ 7.38–7.26 (m, 3.00 H), 7.20–7.15 (m, 2.00 H), 5.57 (d, *J* = 8.2 Hz, 0.25 H), 5.44 (d, *J* = 8.2 Hz, 0.75 H), 5.03 (d, *J* = 14.8 Hz, 0.25 H), 4.73–4.65 (m, 1.00 H), 4.66 (d, *J* = 16.5 Hz, 0.75 H), 4.57 (d, *J* = 16.5 Hz, 0.75 H), 4.19 (d, *J* = 14.8 Hz, 0.25 H), 2.87 (s, 1.50 H), 2.83 (s, 0.50 H), 1.45 (s, 2.25 H), 1.43 (s, 6.75 H), 1.36 (d, *J* = 6.7 Hz, 0.75 H), 1.27 (d, *J* = 6.8 Hz, 2.25 H), 0.13 (s, 2.25 H), 0.06 (s, 6.75 H).

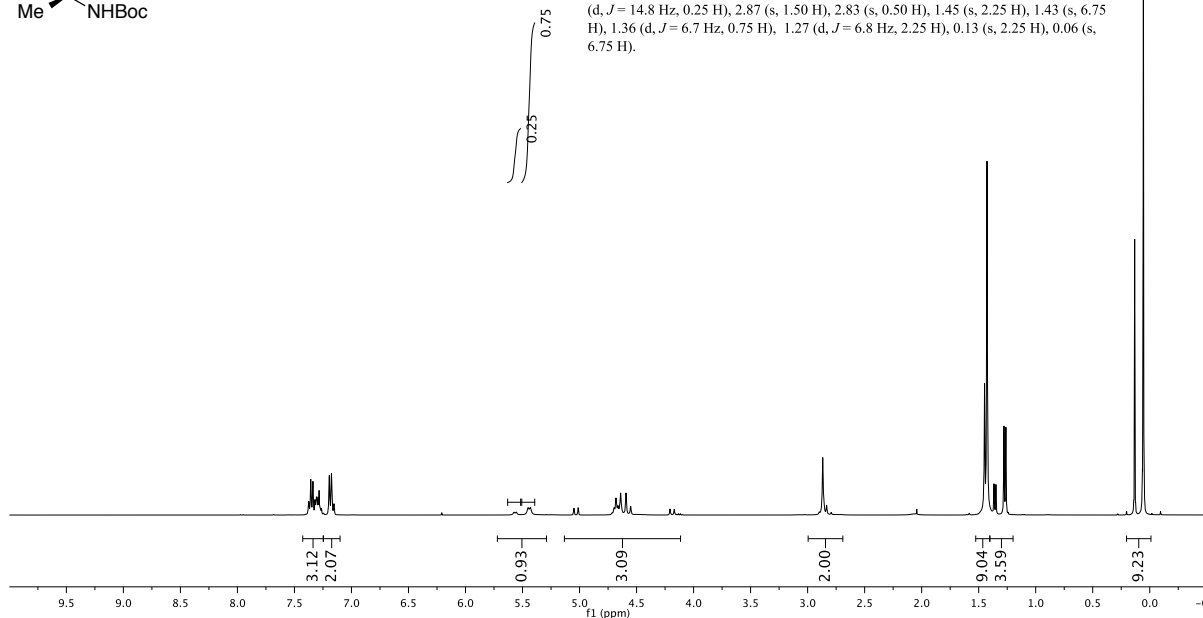

54-17-10-bhsieh.11.fid  
Sample fly-10-095  
group bode  
CAR CDCl<sub>3</sub> /opt/v bhsieh 54

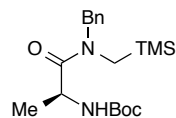

<sup>13</sup>C NMR (101 MHz, CDCl<sub>3</sub>) δ 172.7, 172.3\*, 155.2\*, 155.0, 136.9, 136.4\*, 129.0, 128.7\*, 127.8, 127.7\*, 127.5\*, 126.8, 79.5\*, 79.4, 53.2\*, 50.2, 46.4, 46.0\*, 38.7\*, 38.1, 28.44, 28.43\*, 19.5\*, 19.4, -1.2\*, -1.6.

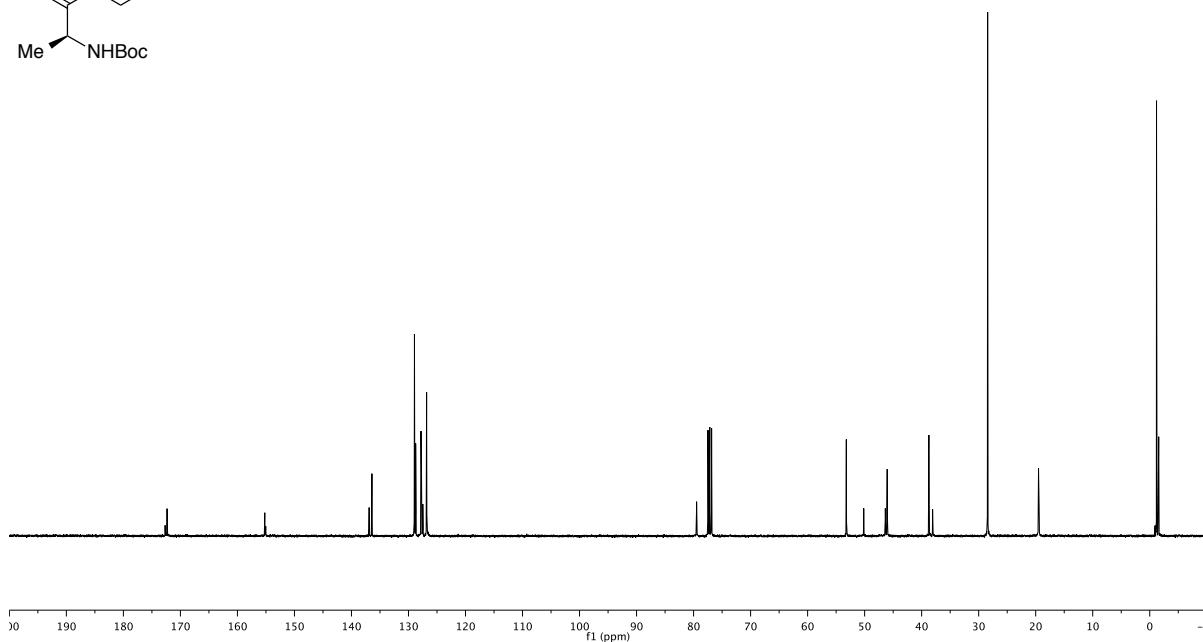

**(S)-2-Amino-N-benzyl-N-((trimethylsilyl)methyl)propanamide (S5)**

42-17-10-bhsieh.10.fid  
Sample fly-10-135  
group bode

<sup>1</sup>H NMR (400 MHz, CDCl<sub>3</sub>) δ 7.36, 7.36, 7.35, 7.35, 7.34, 7.34, 7.33, 7.32, 7.32, 7.32, 7.31, 7.29, 7.29, 7.29, 7.28, 7.28, 7.28, 7.27, 7.26, 7.25, 7.25, 7.24, 7.16, 7.15, 7.14, 7.14, 7.14, 7.13, 7.12, 7.12, 7.12, 5.11, 5.08, 4.65, 4.61, 4.39, 4.35, 4.08, 4.05, 3.78, 3.77, 3.76, 3.75, 3.74, 3.73, 3.72, 3.72, 3.70, 3.17, 3.13, 2.85, 2.85, 2.85, 2.84, 2.81, 2.81, 2.81, 2.80, 2.70, 2.69, 2.66, 2.65, 2.59, 2.59, 2.59, 2.55, 2.55, 2.55, 1.70, 1.28, 1.26, 1.25, 1.23, 0.10, 0.04.

0.26  
0.75

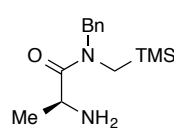

The ratio of rotamers was 75:25 as determined by H NMR at RT.

<sup>1</sup>H NMR (400 MHz, Chloroform-*d*) δ 7.36–7.24 (m, 3 H), 7.16–7.12 (m, 2 H), 5.10 (d, *J* = 14.8 Hz, 0.25 H), 4.63 (d, *J* = 16.7 Hz, 0.75 H), 4.37 (d, *J* = 16.7 Hz, 0.75 H), 4.06 (d, *J* = 14.8 Hz, 0.25 H), 3.78–3.70 (m, 1 H), 3.15 (d, *J* = 14.9 Hz, 0.75 H), 2.83 (d, *J* = 16.3 Hz, 0.25 H), 2.68 (d, *J* = 16.3 Hz, 0.25 H), 2.57 (d, *J* = 14.9 Hz, 0.75 H), 1.70 (br, 2 H), 1.27 (d, *J* = 6.8 Hz, 0.75 H), 1.27 (d, *J* = 6.7 Hz, 2.25 H), 0.10 (s, 2.25 H), 0.04 (s, 6.75 H).

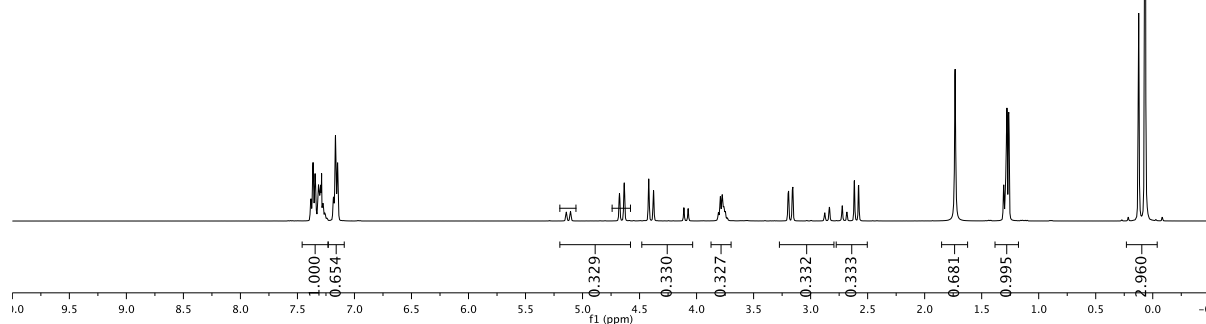

42-17-10-bhsieh.11.fid  
Sample fly-10-135  
group bode

137.29  
136.64  
129.02  
128.80  
128.80  
127.77  
127.77  
126.38

52.80  
50.32  
47.05  
46.94  
38.86  
37.59

22.17  
21.35

1.18  
1.08

<sup>13</sup>C NMR (101 MHz, CDCl<sub>3</sub>) δ 176.1, 175.7\*, 137.3, 136.6\*, 129.0\*, 128.7, 127.81, 127.77\*, 127.4, 126.4\*, 52.8\*, 50.3, 47.0, 46.9\*, 38.9\*, 37.6, 22.2\*, 21.4, -1.2\*, -1.5.

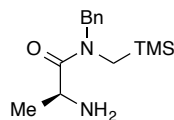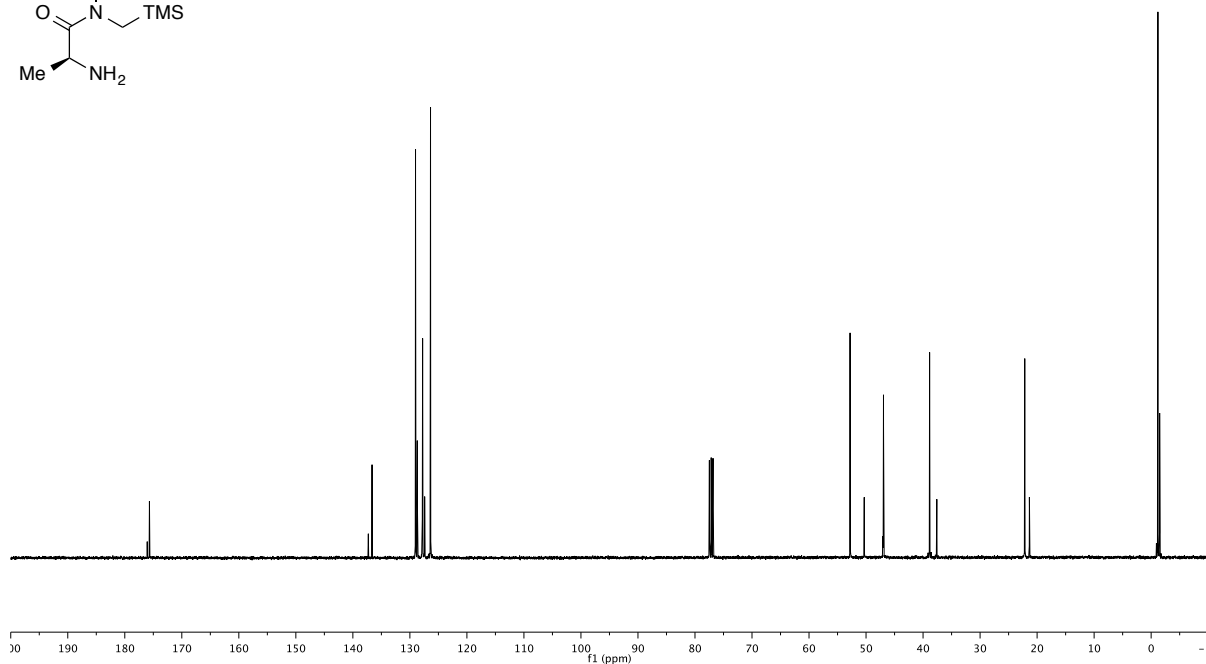

**(*S*)-*N*<sup>1</sup>-Benzyl-*N*<sup>1</sup>-((trimethylsilyl)methyl)propane-1,2-diamine (10)**

43-17-10-bhsieh.10.fid  
Sample fly-10-137  
group bode

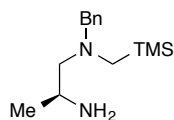

<sup>1</sup>H NMR (400 MHz, CDCl<sub>3</sub>) δ 7.32, 7.31, 7.30, 7.29, 7.29, 7.28, 7.28, 7.27, 7.27, 7.25, 7.24, 7.24, 7.23, 7.23, 7.22, 7.22, 7.21, 7.21, 7.21, 7.20, 3.74, 3.71, 3.28, 3.24, 3.02, 3.01, 3.01, 3.00, 3.00, 2.99, 2.99, 2.98, 2.97, 2.97, 2.96, 2.96, 2.95, 2.94, 2.20, 2.17, 2.17, 2.14, 2.13, 2.12, 2.10, 2.09, 2.08, 1.88, 1.86, 1.83, 0.97, 0.96, 0.07.

<sup>1</sup>H NMR (400 MHz, Chloroform-*d*) δ 7.32–7.27 (m, 4 H), 7.24–7.20 (m, 1 H), 3.73 (d, *J* = 13.5 Hz, 1 H), 3.26 (d, *J* = 13.5 Hz, 1 H), 3.02–2.94 (m, 1 H), 2.17 (dd, *J* = 12.2, 9.1 Hz, 1 H), 2.11 (dd, *J* = 12.2, 4.4 Hz, 1 H), 2.10 (d, *J* = 14.8 Hz, 1 H), 1.88 (br, 2 H), 1.85 (d, *J* = 14.8 Hz, 1 H), 0.97 (d, *J* = 6.4 Hz, 3 H), 0.07 (s, 9 H).

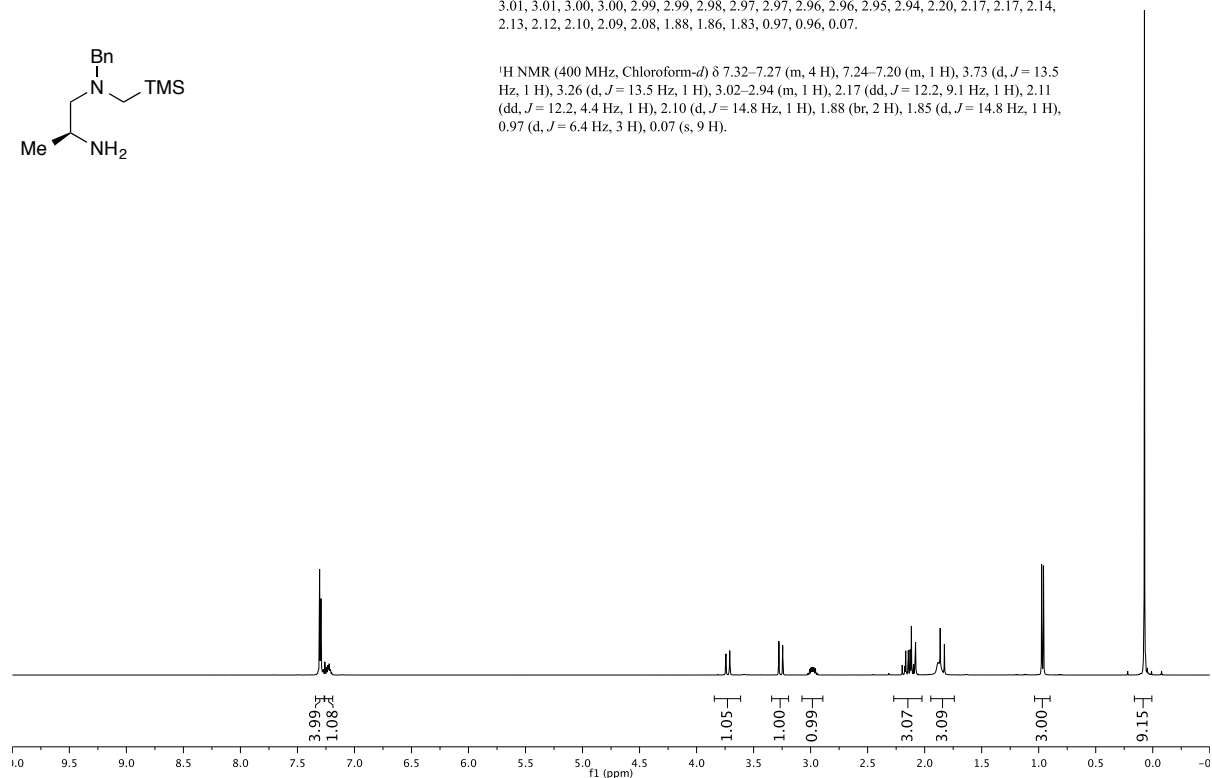

43-17-10-bhsieh.11.fid  
Sample fly-10-137  
group bode

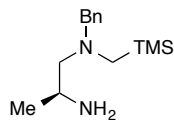

<sup>13</sup>C NMR (101 MHz, CDCl<sub>3</sub>) δ 140.0, 129.0, 128.3, 127.0, 66.7, 62.7, 47.0, 44.6, 21.0, -1.1.

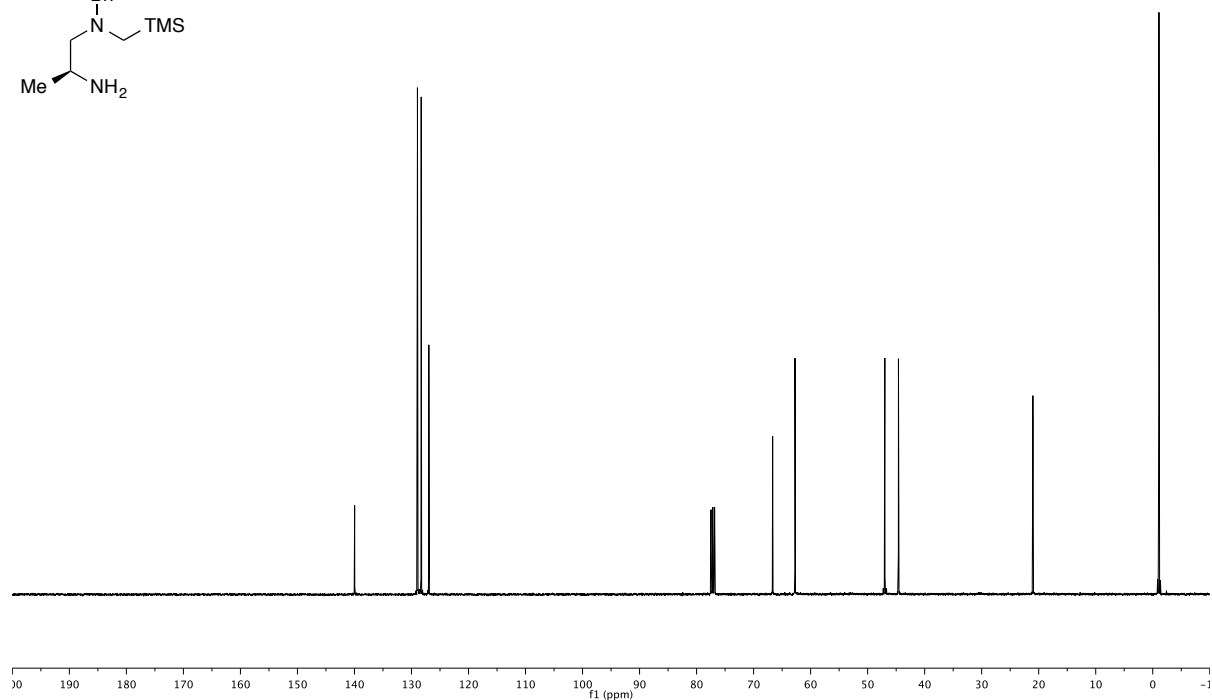

**1-((*tert*-Butoxycarbonyl)amino)cyclohexanecarboxylic acid (S6)**

43-25-10-bhsieh.10.fid  
Sample fly-10-102  
group bode

<sup>1</sup>H NMR (400 MHz, MeOD)  $\delta$  4.88, 2.02, 2.01, 2.01, 1.99, 1.98, 1.82, 1.81, 1.79, 1.78, 1.76, 1.75, 1.63, 1.62, 1.61, 1.60, 1.59, 1.59, 1.59, 1.58, 1.57, 1.56, 1.55, 1.54, 1.53, 1.51, 1.50, 1.49, 1.48, 1.47, 1.45, 1.45, 1.43, 1.37, 1.35, 1.34, 1.34, 1.33, 1.33, 1.32, 1.31, 1.30, 1.29, 1.28, 1.27, 1.26, 1.26, 1.24, 1.24, 1.22.

<sup>1</sup>H NMR (400 MHz, Methanol-*d*<sub>4</sub>)  $\delta$  4.88 (br, 2 H), 2.02–1.98 (m, 2 H), 1.78 (ddd, *J* = 13.8, 12.6, 4.2 Hz, 2 H), 1.53–1.45 (m, 5 H), 1.43 (s, 9 H), 1.37–1.22 (m, 1H).

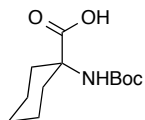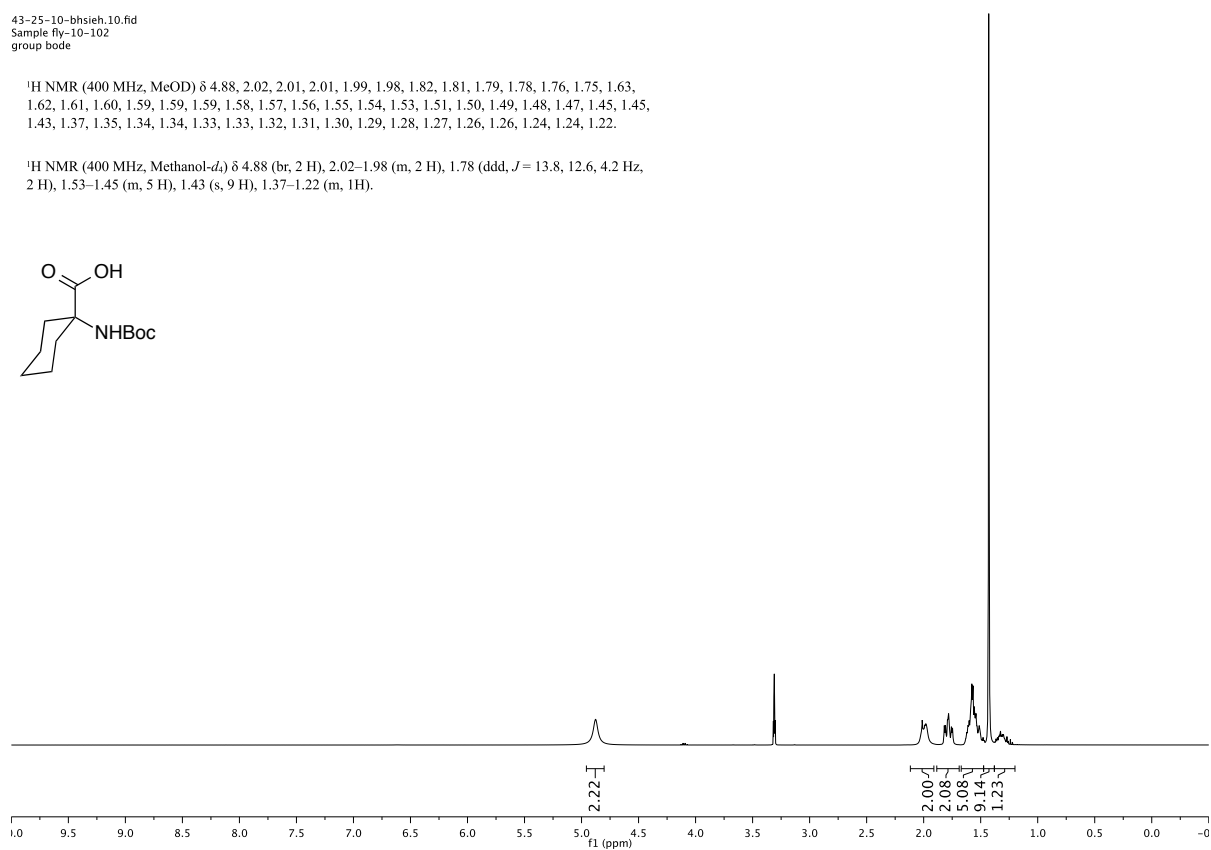

43-25-10-bhsieh.11.fid  
Sample fly-10-102  
group bode

<sup>13</sup>C NMR (101 MHz, MeOD)  $\delta$  178.8, 157.3, 80.1, 59.8, 33.6, 28.8, 26.5, 22.5.

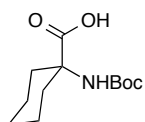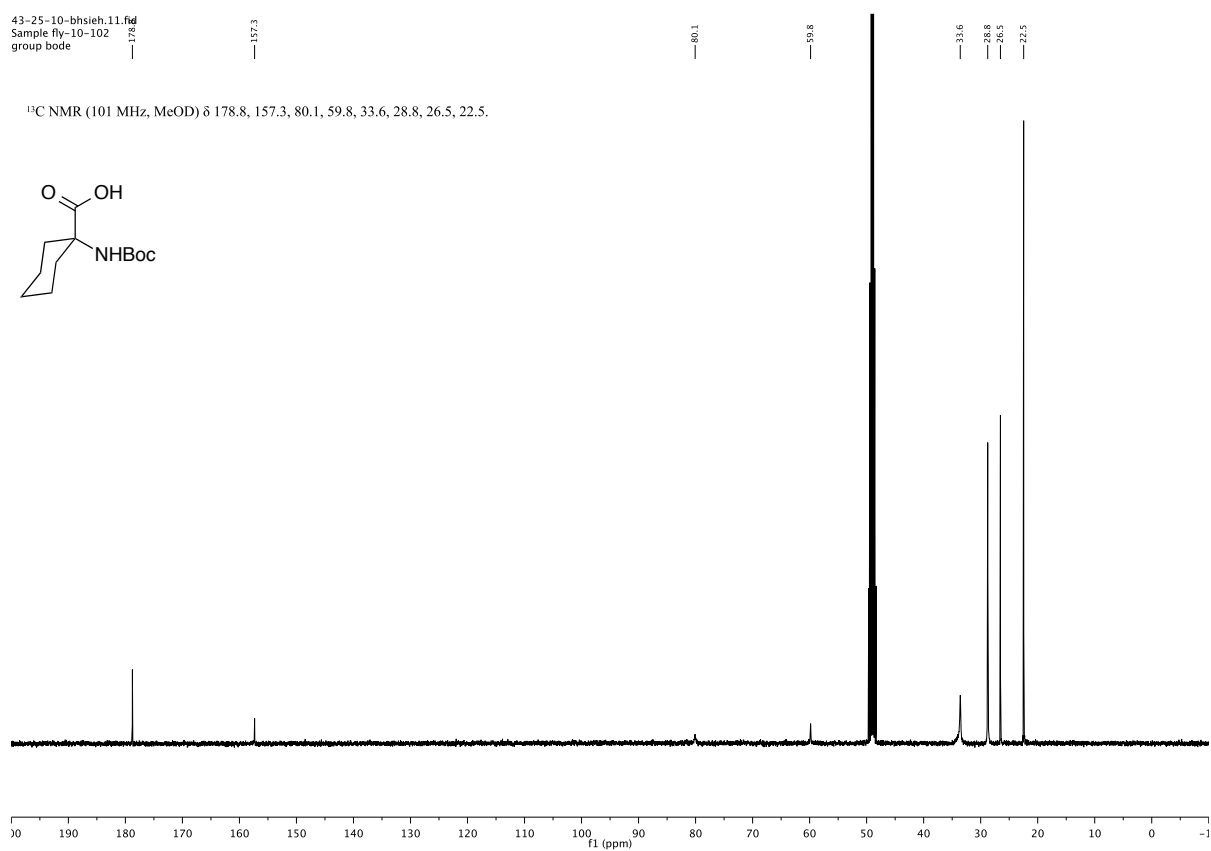



***tert*-Butyl (1-(benzyl((trimethylsilyl)methyl)carbamoyl)cyclohexyl)carbamate (S7)**

55-17-10-bhsieh.10.fid  
Sample fly-10-111  
group bode  
PRO CDCl<sub>3</sub> /opt/v bhsieh 55

<sup>1</sup>H NMR (400 MHz, CDCl<sub>3</sub>) δ 7.36, 7.34, 7.32, 7.29, 7.28, 7.27, 7.25, 7.21, 7.20, 4.90, 4.77, 2.76, 2.13, 2.09, 1.99, 1.98, 1.96, 1.95, 1.92, 1.91, 1.72, 1.71, 1.70, 1.69, 1.67, 1.67, 1.64, 1.63, 1.62, 1.61, 1.60, 1.59, 1.42, 1.35, 1.32, 1.32, 1.30, 1.29, 0.04.

<sup>1</sup>H NMR (400 MHz, Chloroform-*d*) δ 7.36–7.20 (m, 5 H), 4.90 (s, 2 H), 4.77 (br, 1 H), 2.76 (s, 2 H), 2.11 (apparent d, *J* = 13.8 Hz, 2 H), 1.96 (apparent dt, *J* = 13.8, 6.8 Hz, 2 H), 1.72–1.59 (m, 3 H), 1.42 (s, 9 H), 1.35–1.29 (m, 3 H), 0.04 (s, 9 H).

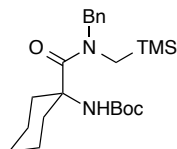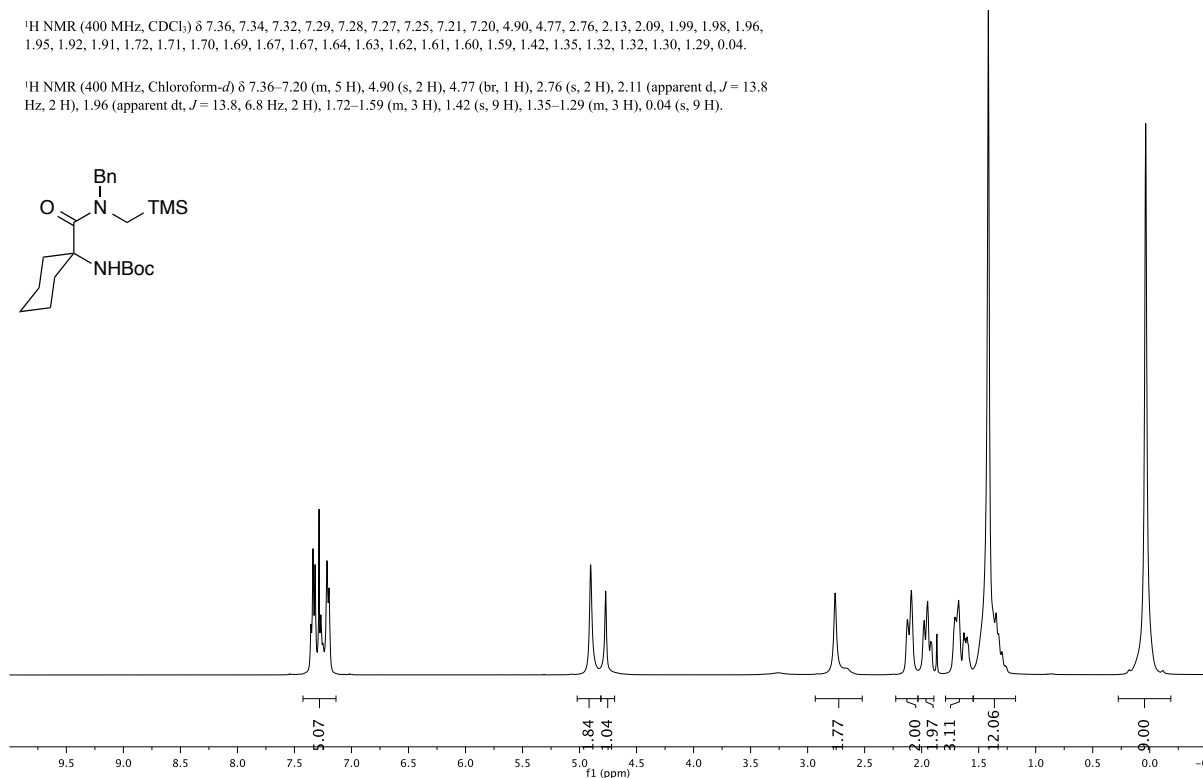

55-17-10-bhsieh.11.fid  
Sample fly-10-111  
group bode  
CAR CDCl<sub>3</sub> /opt/v bhsieh 55

<sup>13</sup>C NMR (101 MHz, CDCl<sub>3</sub>) δ 172.3, 153.7, 137.5, 128.7, 127.3, 127.2, 79.7, 59.1, 53.3, 39.4, 33.2, 28.5, 25.3, 21.7, -0.8.

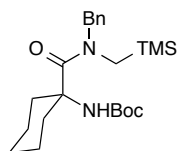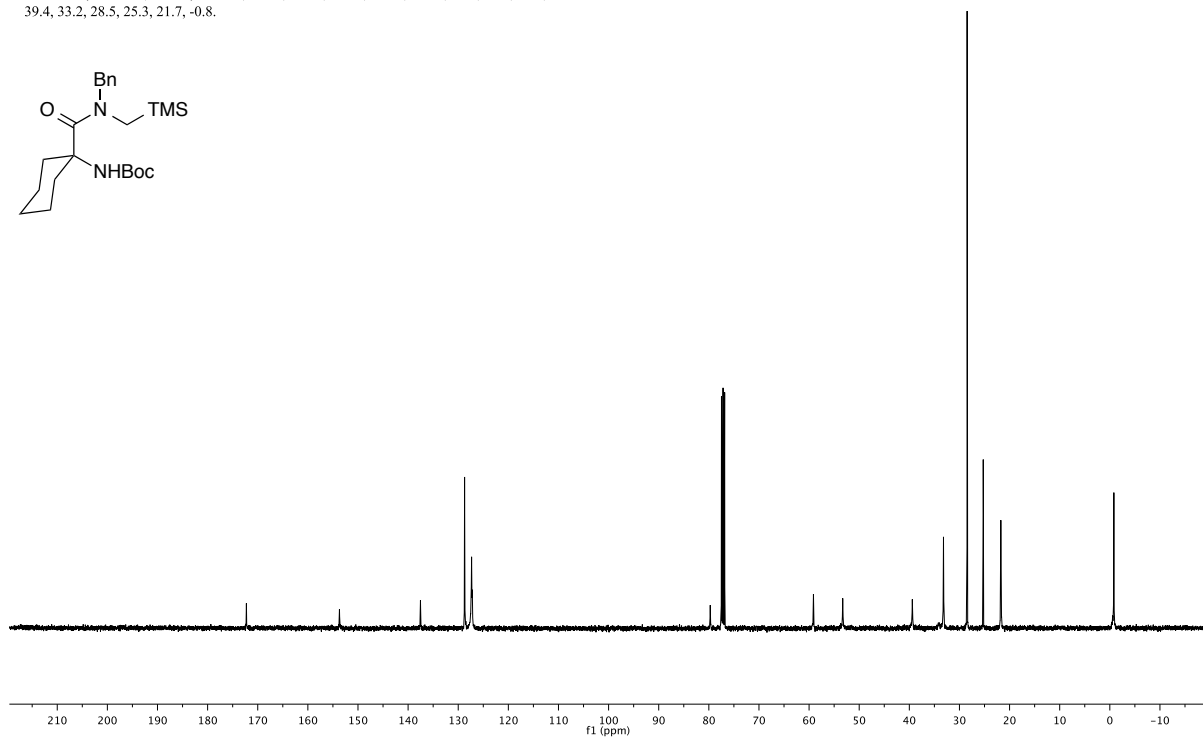

**1-Amino-*N*-benzyl-*N*-((trimethylsilyl)methyl)cyclohexanecarboxamide (S8)**

44-17-10-bhsieh.10.fid  
Sample fly-10-153  
group bode

<sup>1</sup>H NMR (400 MHz, CDCl<sub>3</sub>) δ 7.36, 7.35, 7.35, 7.34, 7.34, 7.33, 7.32, 7.32, 7.31, 7.27, 7.27, 7.27, 7.26, 7.25, 7.25, 7.24, 7.23, 7.23, 7.19, 7.18, 7.18, 7.17, 7.17, 7.16, 5.22, 2.73, 2.07, 2.06, 2.04, 2.03, 2.02, 2.01, 2.00, 1.67, 1.66, 1.65, 1.65, 1.64, 1.64, 1.63, 1.62, 1.61, 1.60, 1.58, 1.58, 1.56, 1.55, 1.54, 1.54, 1.53, 1.51, 1.50, 1.50, 1.49, 1.48, 1.47, 1.45, 1.45, 1.44, 1.37, 1.36, 1.35, 1.35, 1.34, 1.34, 1.33, 1.33, 1.32, 1.31, 1.31, 1.30, 1.30, 1.29, 0.04.

<sup>1</sup>H NMR (400 MHz, Chloroform-*d*) δ 7.36–7.31 (m, 2 H), 7.27–7.23 (m, 1 H), 7.19–7.16 (m, 2 H), 5.22 (s, 2 H), 2.73 (s, 2 H), 2.03 (ddd, *J* = 13.9, 10.5, 3.7 Hz, 1 H), 1.67–1.29 (m, 10 H), 0.04 (s, 9 H).

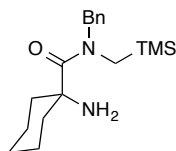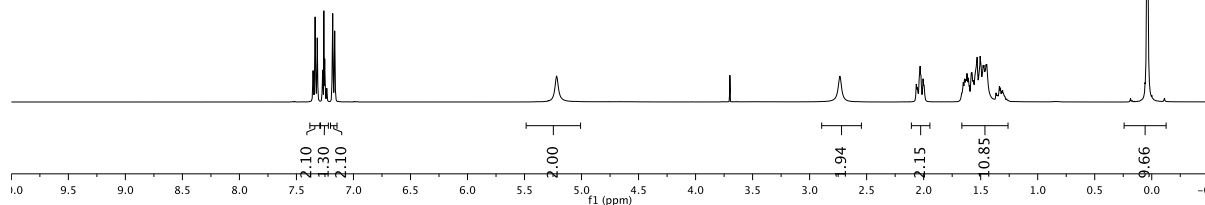

44-17-10-bhsieh.11.fid  
Sample fly-10-153  
group bode

175.3  
138.4  
128.7  
127.1  
126.8  
58.4  
54.4  
39.8  
37.4  
25.6  
22.2  
-0.8

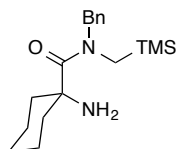

<sup>13</sup>C NMR (101 MHz, CDCl<sub>3</sub>) δ 175.3, 138.4, 128.7, 127.1, 126.8, 58.4, 54.4, 39.8, 37.4, 25.6, 22.2, -0.8.

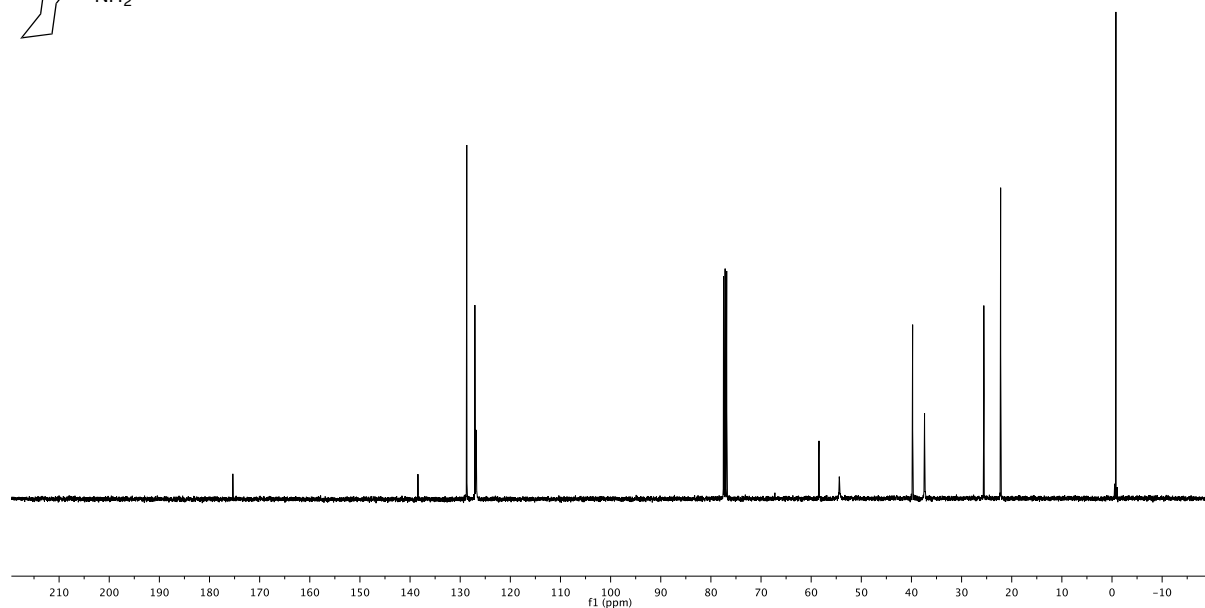

**1-((Benzyl((trimethylsilyl)methyl)amino)methyl)cyclohexanamine (11)**

16-21-08-bhsieh.10.fid  
Sample fly-10-159  
group bode  
PRO CDCl<sub>3</sub> /opt/v bhsieh 16

<sup>1</sup>H NMR (400 MHz, CDCl<sub>3</sub>) δ 7.36, 7.35, 7.35, 7.34, 7.33, 7.33, 7.32, 7.31, 7.31, 7.31, 7.30, 7.29, 7.29, 7.26, 7.25, 7.25, 7.24, 7.24, 7.23, 7.22, 3.61, 2.37, 2.23, 1.52, 1.51, 1.50, 1.50, 1.49, 1.49, 1.48, 1.47, 1.47, 1.46, 1.45, 1.44, 1.44, 1.43, 1.41, 1.40, 1.38, 1.37, 1.36, 1.35, 1.29, 1.28, 1.28, 1.26, 1.24, 1.24, 1.22, 1.22, 1.21, 1.20, 1.20, 1.19, 1.19, 1.18, 0.12.

<sup>1</sup>H NMR (400 MHz, Chloroform-*d*) δ 7.36–7.29 (m, 4 H), 7.26–7.22 (m, 1 H), 3.61 (s, 2 H), 2.37 (s, 2 H), 2.23 (s, 2 H), 1.52–1.35 (m, 5 H), 1.29–1.18 (m, 7 H), 0.12 (s, 9 H).

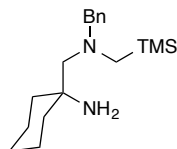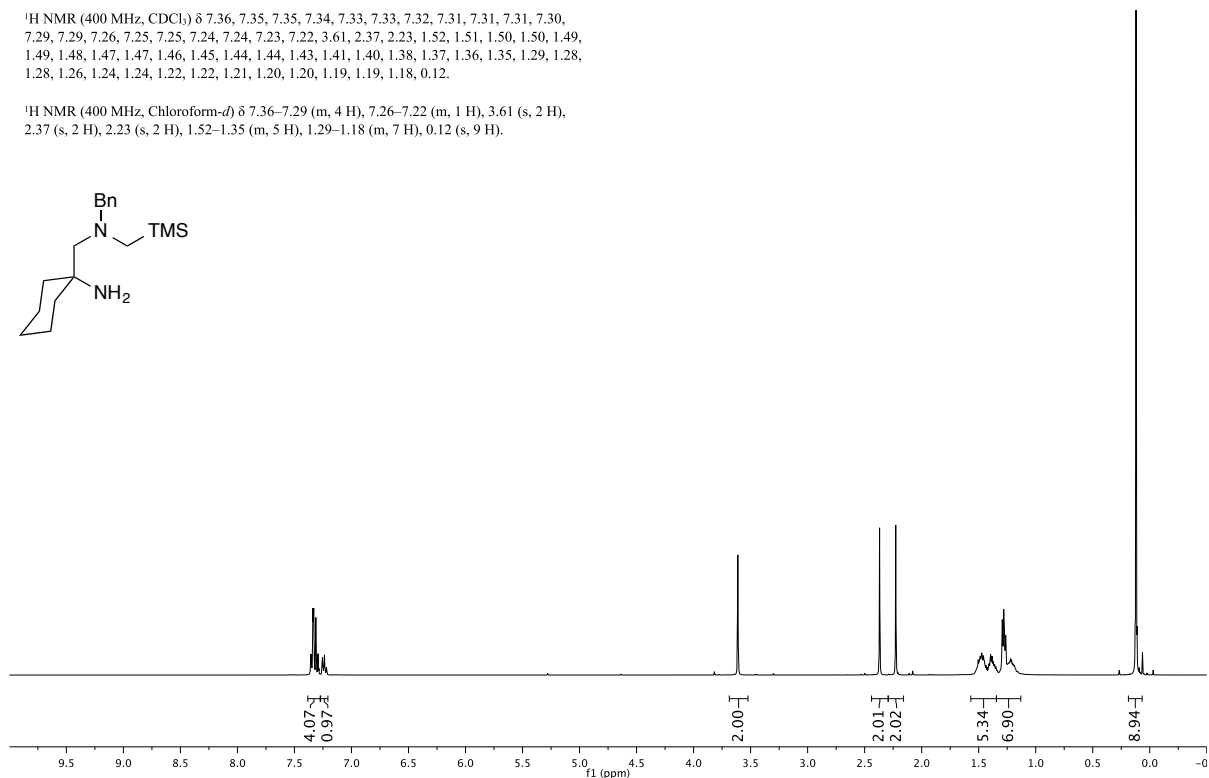

16-21-08-bhsieh.11.fid  
Sample fly-10-159  
group bode  
CAR CDCl<sub>3</sub> /opt/v bhsieh 16

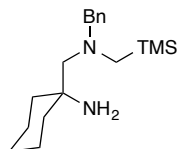

<sup>13</sup>C NMR (101 MHz, CDCl<sub>3</sub>) δ 140.4, 129.2, 128.2, 126.9, 69.6, 64.5, 52.0, 50.8, 37.6, 26.2, 22.0, -0.8.

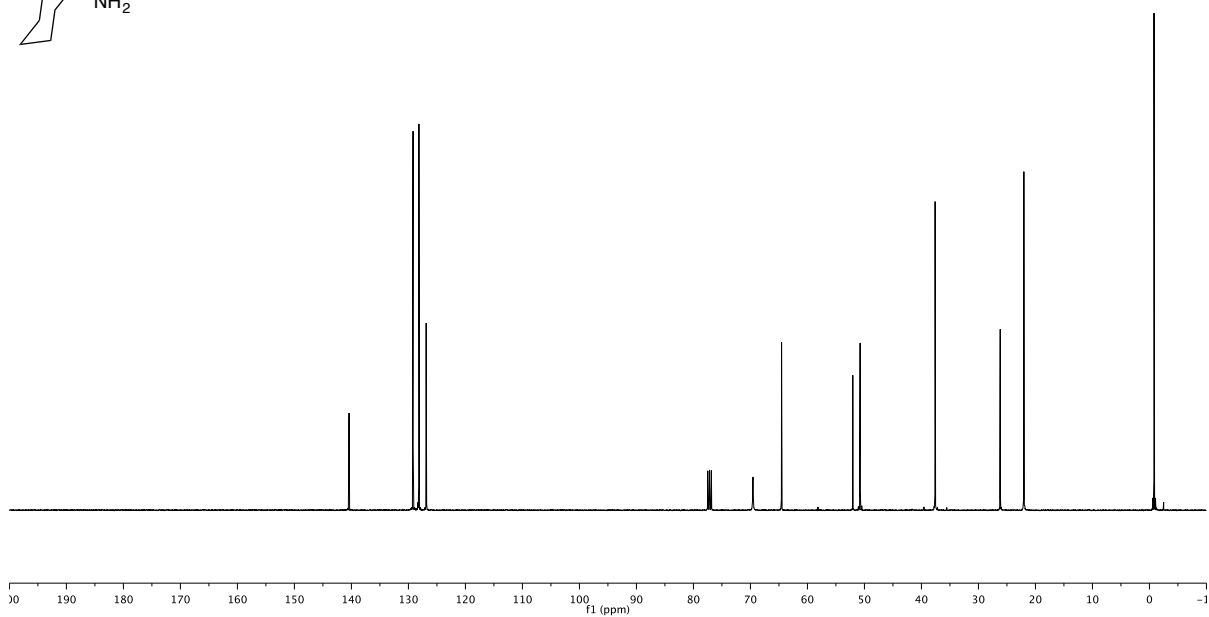

***trans*-4-(((Trimethylsilyl)methyl)amino)tetrahydrofuran-3-ol (S9)**

48-17-10-bhsieh.10.fid  
Sample fly-10-024  
group bode  
PRO CDCl<sub>3</sub> /opt/v bhsieh 48

<sup>1</sup>H NMR (400 MHz, CDCl<sub>3</sub>) δ 4.14, 4.14, 4.14, 4.13, 4.13, 4.13, 4.12, 4.06, 4.05, 4.04, 4.02, 3.97, 3.95, 3.94, 3.93, 3.66, 3.66, 3.64, 3.63, 3.57, 3.56, 3.54, 3.53, 3.10, 3.09, 3.09, 3.08, 3.08, 3.07, 2.20, 2.05, 0.02.

<sup>1</sup>H NMR (400 MHz, Chloroform-*d*) δ 4.13 (ddd, *J* = 4.3, 2.7, 1.3 Hz, 1 H), 4.04 (dd, *J* = 9.1, 5.6 Hz, 1 H), 3.95 (dd, *J* = 9.8, 4.6 Hz, 1 H), 3.65 (dd, *J* = 9.8, 2.7 Hz, 1 H), 3.55 (dd, *J* = 9.1, 3.4 Hz, 1 H), 3.08 (ddd, *J* = 5.6, 3.4, 1.3 Hz, 1 H), 2.20 (br, 2 H), 2.05 (s, 2 H), 0.02 (s, 9 H).

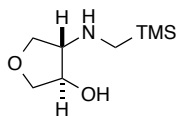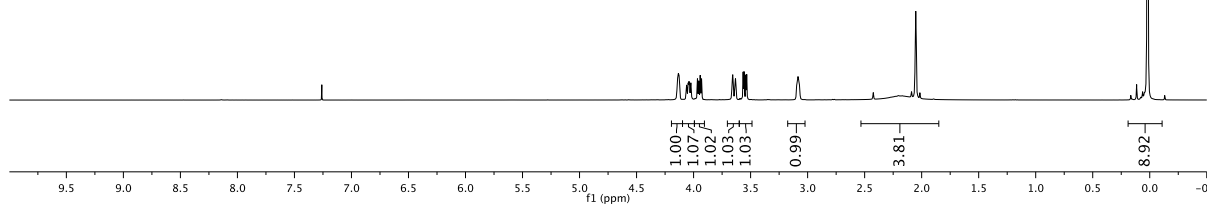

48-17-10-bhsieh.11.fid  
Sample fly-10-024  
group bode  
CAR CDCl<sub>3</sub> /opt/v bhsieh 48

76.1  
74.2  
72.3  
70.7  
38.4  
-2.6

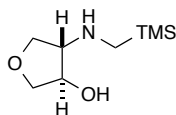

<sup>13</sup>C NMR (101 MHz, CDCl<sub>3</sub>) δ 76.1, 74.2, 72.3, 70.7, 38.4, -2.6.

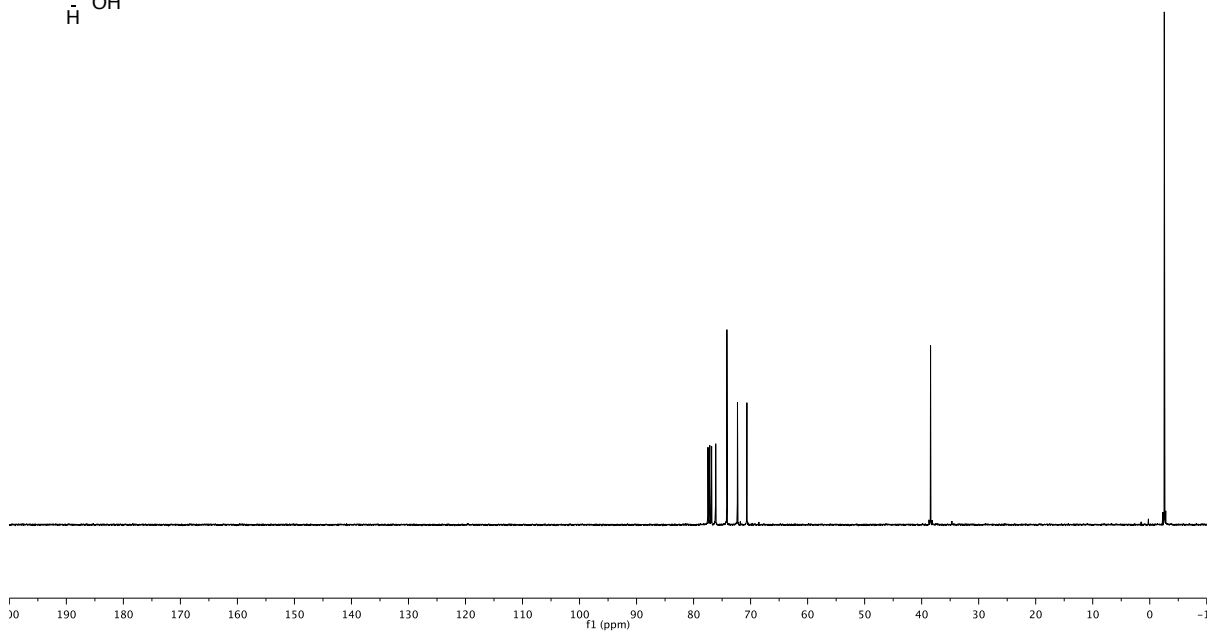

***trans*-4-(Benzyl((trimethylsilyl)methyl)amino)tetrahydrofuran-3-ol (S10)**

42-27-10-bhsieh.10.fid  
Sample fly-10-032  
group bode

<sup>1</sup>H NMR (400 MHz, CDCl<sub>3</sub>) δ 7.39, 7.38, 7.37, 7.36, 7.36, 7.36, 7.35, 7.34, 7.34, 7.34, 7.33, 7.33, 7.32, 7.32, 7.32, 7.29, 7.28, 7.28, 7.27, 7.27, 7.26, 7.26, 7.25, 4.44, 4.43, 4.43, 4.42, 4.42, 4.41, 4.41, 4.40, 3.98, 3.97, 3.96, 3.95, 3.94, 3.92, 3.91, 3.89, 3.73, 3.72, 3.70, 3.69, 3.66, 3.65, 3.60, 3.59, 3.58, 3.56, 3.28, 3.27, 3.27, 3.26, 3.25, 3.25, 3.24, 2.20, 2.14, 2.10, 2.06, 2.02, 0.10.

<sup>1</sup>H NMR (400 MHz, Chloroform-*d*) δ 7.39–7.32 (m, 4 H), 7.29–7.25 (m, 1 H), 4.42 (ddd, *J* = 5.8, 4.2, 3.0 Hz, 1 H), 3.96 (dd, *J* = 9.8, 5.8 Hz, 1 H), 3.91 (dd, *J* = 9.6, 7.8 Hz, 1 H), 3.71 (dd, *J* = 9.6, 5.5 Hz, 1 H), 3.65 (apparent d, *J* = 3.2 Hz, 2 H), 3.58 (dd, *J* = 9.8, 4.2 Hz, 1 H), 3.26 (ddd, *J* = 7.8, 5.5, 3.0 Hz, 1 H), 2.20 (br, 1 H), 2.12 (d, *J* = 14.8 Hz, 1 H), 2.04 (d, *J* = 14.8 Hz, 1 H), 0.10 (s, 9 H).

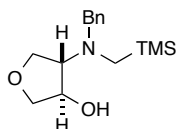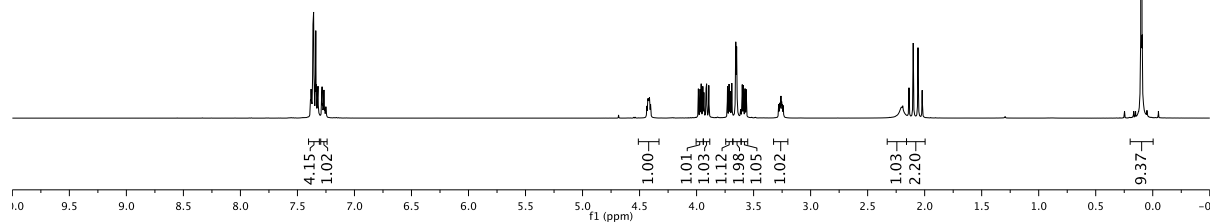

42-27-10-bhsieh.11.fid  
Sample fly-10-032  
group bode

<sup>13</sup>C NMR (101 MHz, CDCl<sub>3</sub>) δ 139.8, 128.6, 128.4, 127.1, 75.1, 72.9, 71.7, 69.1, 59.4, 42.4, -1.3.

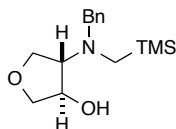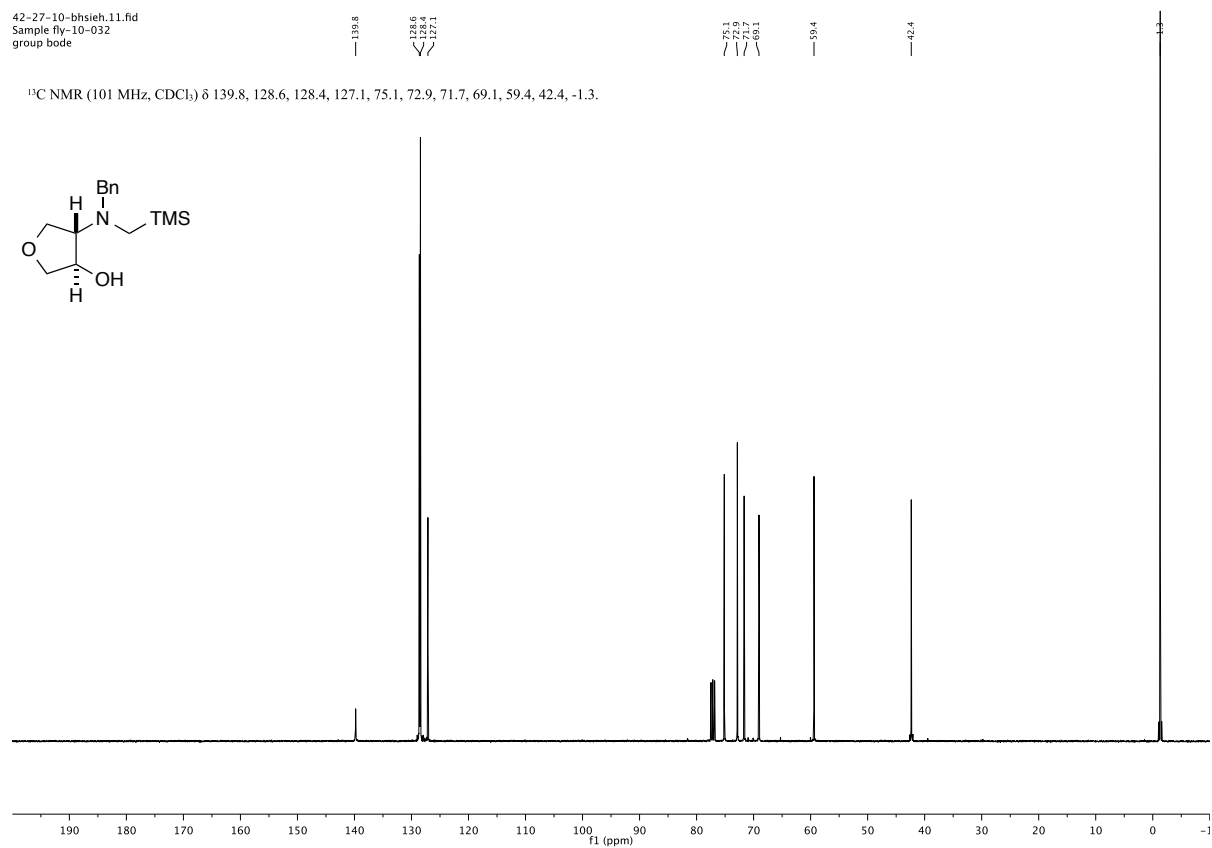

2-(*trans*-4-(Benzyl((trimethylsilyl)methyl)amino)tetrahydrofuran-3-yl)isoindoline-1,3-dione (S11)

43-27-10-bhsieh.10.fid  
Sample fly-10-039  
group bode

<sup>1</sup>H NMR (400 MHz, CDCl<sub>3</sub>) δ 7.84, 7.83, 7.82, 7.81, 7.81, 7.81, 7.80, 7.79, 7.75, 7.75, 7.74, 7.73, 7.73, 7.73, 7.72, 7.71, 7.10, 7.09, 7.09, 7.08, 7.08, 7.07, 7.07, 7.06, 7.06, 7.05, 7.05, 7.05, 7.04, 7.04, 7.04, 7.03, 7.03, 7.02, 7.02, 7.01, 7.01, 7.00, 4.98, 4.97, 4.96, 4.95, 4.94, 4.93, 4.14, 4.12, 4.12, 4.10, 4.09, 4.07, 3.94, 3.93, 3.91, 3.91, 3.90, 3.89, 3.89, 3.88, 3.87, 3.87, 3.86, 3.84, 3.70, 3.66, 3.42, 3.38, 2.18, 2.15, 2.05, 2.01, 0.03.

<sup>1</sup>H NMR (400 MHz, Chloroform-*d*) δ 7.84–7.79 (m, 2 H), 7.75–7.71 (m, 2 H), 7.10–7.00 (m, 5 H), 4.96 (ddd, *J* = 8.7, 8.7, 4.6 Hz, 1 H), 4.14–4.07 (m, 2 H), 3.99–3.84 (m, 3 H), 3.68 (d, *J* = 13.9 Hz, 1 H), 3.40 (d, *J* = 13.9 Hz, 1 H), 2.16 (d, *J* = 14.8 Hz, 1 H), 2.03 (d, *J* = 14.8 Hz, 1 H), 0.03 (s, 9 H).

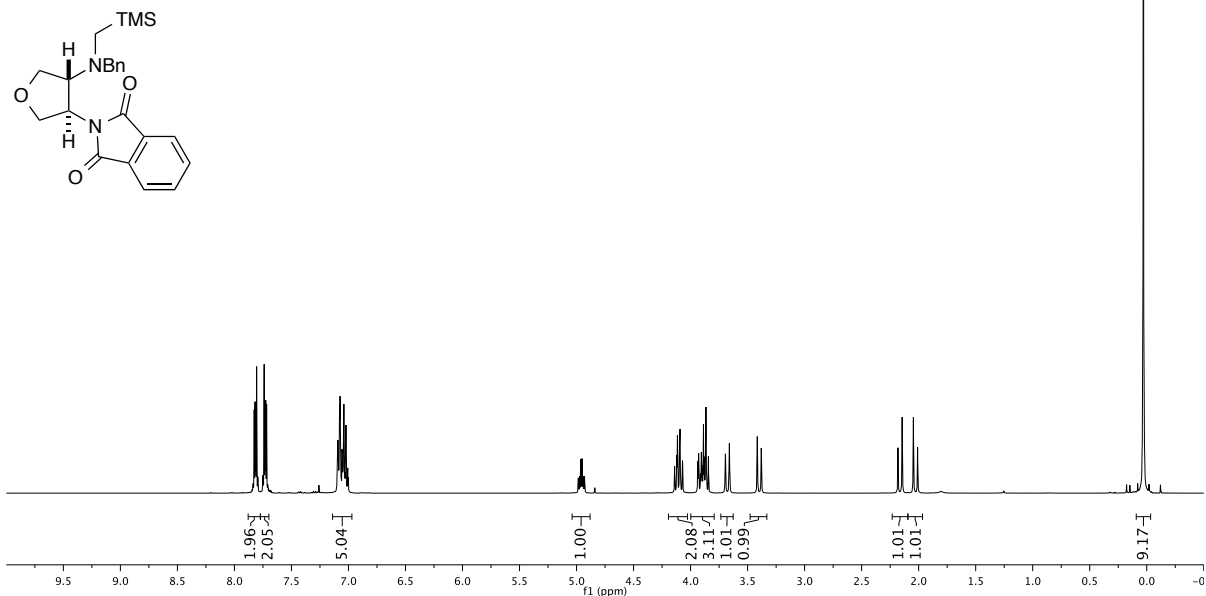

43-27-10-bhsieh.11.fid  
Sample fly-10-039  
group bode

<sup>13</sup>C NMR (101 MHz, CDCl<sub>3</sub>) δ 167.8, 139.4, 134.2, 131.8, 128.3, 128.2, 127.0, 123.3, 70.9, 68.9, 65.1, 58.8, 49.4, 40.5, -1.4.

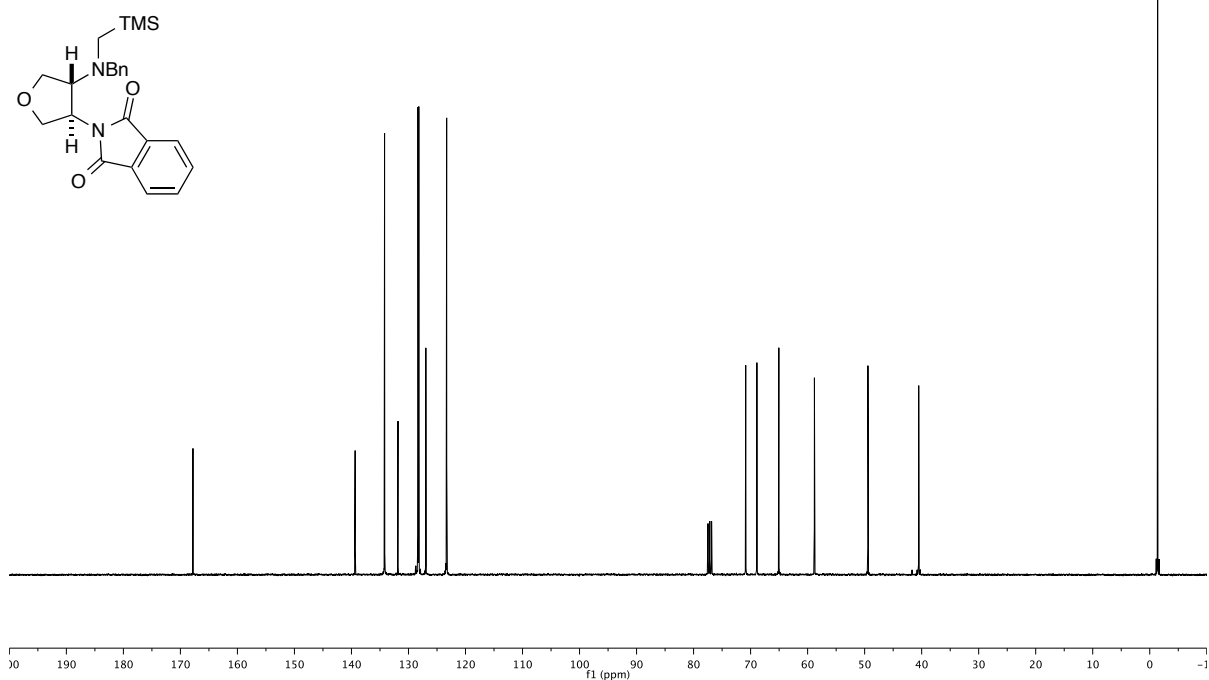

***trans*-N<sup>3</sup>-Benzyl-N<sup>3</sup>-((trimethylsilyl)methyl)tetrahydrofuran-3,4-diamine (12)**

40-17-06-bhsieh.10.fid  
Sample fly-10-042  
group bode

<sup>1</sup>H NMR (400 MHz, CDCl<sub>3</sub>) δ 7.36, 7.35, 7.35, 7.34, 7.33, 7.33, 7.33, 7.32, 7.32, 7.31, 7.31, 7.31, 7.30, 7.29, 7.29, 7.29, 7.28, 7.26, 7.25, 7.25, 7.24, 7.24, 7.23, 7.23, 7.22, 7.22, 7.21, 4.02, 4.00, 4.00, 3.98, 3.84, 3.82, 3.82, 3.81, 3.80, 3.79, 3.78, 3.77, 3.71, 3.67, 3.54, 3.52, 3.51, 3.50, 3.49, 3.48, 3.47, 3.29, 3.28, 3.27, 3.26, 3.04, 3.03, 3.02, 3.02, 3.01, 3.00, 2.05, 1.25, 0.07.

<sup>1</sup>H NMR (400 MHz, Chloroform-*d*) δ 7.36–7.29 (m, 4 H), 7.26–7.21 (m, 1 H), 4.00 (dd, *J* = 9.0, 6.7 Hz, 1 H), 3.84–3.77 (m, 2 H), 3.69 (d, *J* = 14.1 Hz, 1 H), 3.52 (d, *J* = 14.1 Hz, 1 H), 3.50 (apparent td, *J* = 6.7, 4.9 Hz, 1 H), 3.28 (dd, *J* = 9.0, 6.7 Hz, 1 H), 3.02 (apparent dt, *J* = 7.4, 5.6 Hz, 1 H), 2.05 (s, 2 H), 1.25 (br, 2 H), 0.07 (s, 9 H).

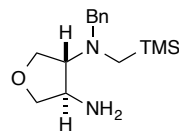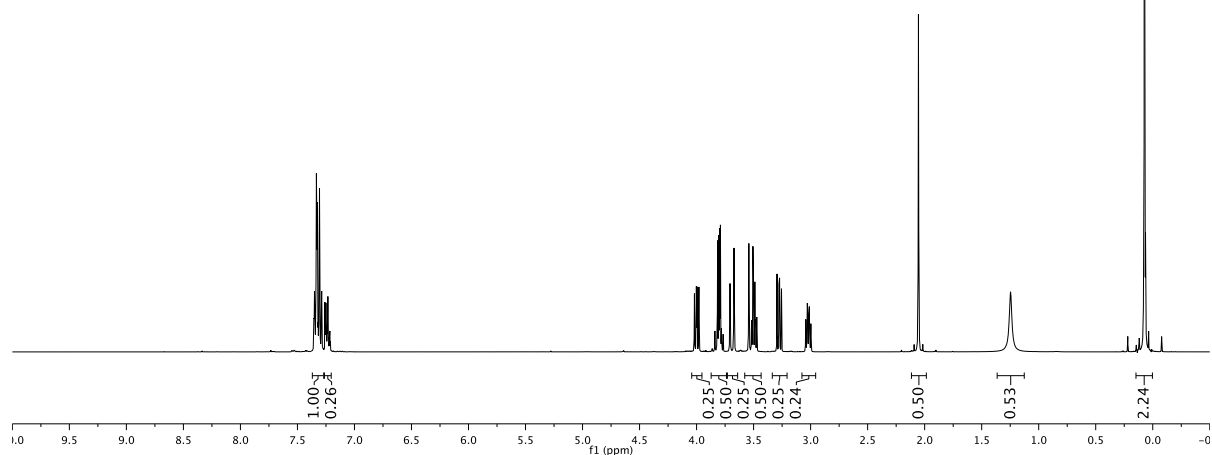

40-17-06-bhsieh.11.fid  
Sample fly-10-042  
group bode

140.0 128.5 128.4 127.1 75.3 71.7 67.8 59.5 53.5 41.7 -1.3

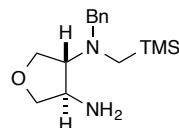

<sup>13</sup>C NMR (101 MHz, CDCl<sub>3</sub>) δ 140.0, 128.5, 128.4, 127.1, 75.3, 71.7, 67.8, 59.5, 53.5, 41.7, -1.3.

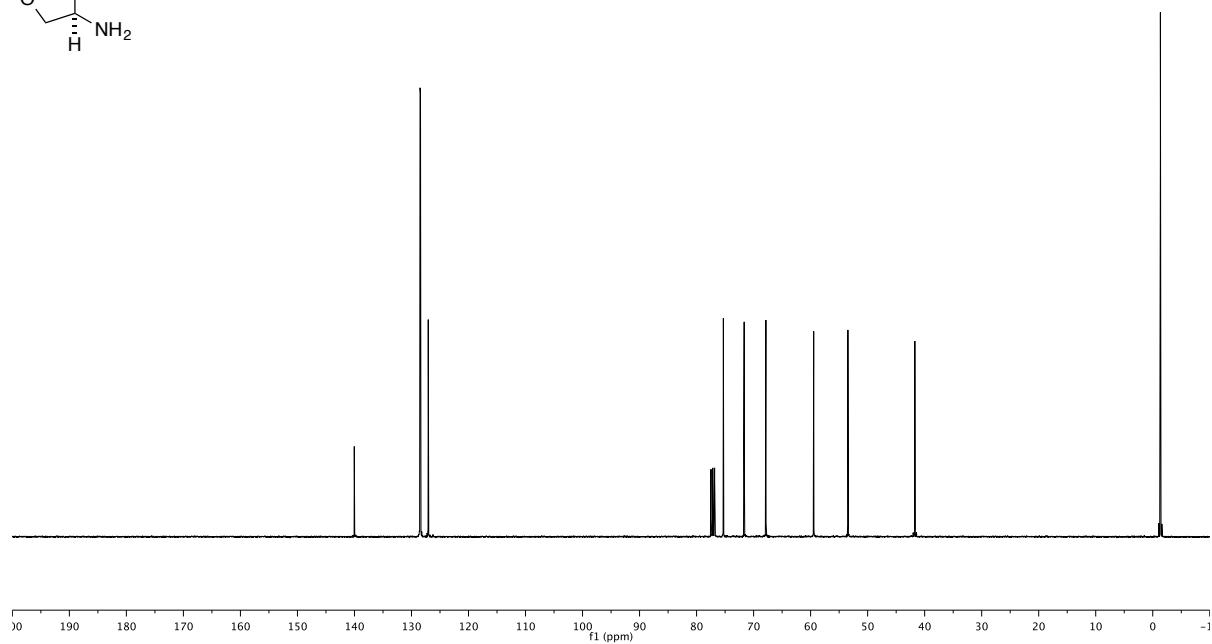

2-(*trans*-2-Aminocyclohexyl)isoindoline-1,3-dione (S12)

42-24-10-bhsieh.10.fid  
Sample fly-10-041  
group bode

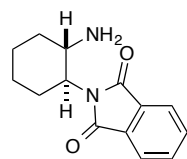

<sup>1</sup>H NMR (400 MHz, CDCl<sub>3</sub>) δ 7.84, 7.84, 7.83, 7.82, 7.81, 7.81, 7.80, 7.79, 7.71, 7.71, 7.70, 7.69, 7.69, 7.68, 7.67, 7.67, 3.83, 3.82, 3.80, 3.80, 3.79, 3.79, 3.77, 3.76, 3.44, 3.43, 3.41, 3.41, 3.40, 3.40, 3.39, 3.38, 2.24, 2.23, 2.21, 2.20, 2.17, 2.17, 2.14, 2.13, 2.07, 2.06, 2.06, 2.06, 2.05, 2.05, 2.05, 2.04, 2.04, 2.03, 2.03, 2.03, 2.02, 2.02, 2.02, 2.01, 2.01, 1.84, 1.84, 1.83, 1.83, 1.82, 1.82, 1.81, 1.81, 1.81, 1.81, 1.80, 1.80, 1.80, 1.79, 1.78, 1.78, 1.78, 1.77, 1.77, 1.76, 1.75, 1.75.

<sup>1</sup>H NMR (400 MHz, Chloroform-*d*) δ 7.82 (dd, *J* = 5.4, 3.1 Hz, 2 H), 7.69 (dd, *J* = 5.4, 3.1 Hz, 2 H), 3.79 (ddd, *J* = 12.4, 10.5, 3.9 Hz, 1 H), 3.41 (ddd, *J* = 11.3, 10.5, 4.1 Hz, 1 H), 2.19 (dddd, *J* = 12.6, 12.6, 12.4, 3.5 Hz, 1 H), 2.07–2.01 (m, 1 H), 1.84–1.73 (m, 1 H), 1.49–1.28 (m, 4 H), 1.19 (dddd, *J* = 12.8, 11.3, 3.6 Hz, 1 H).

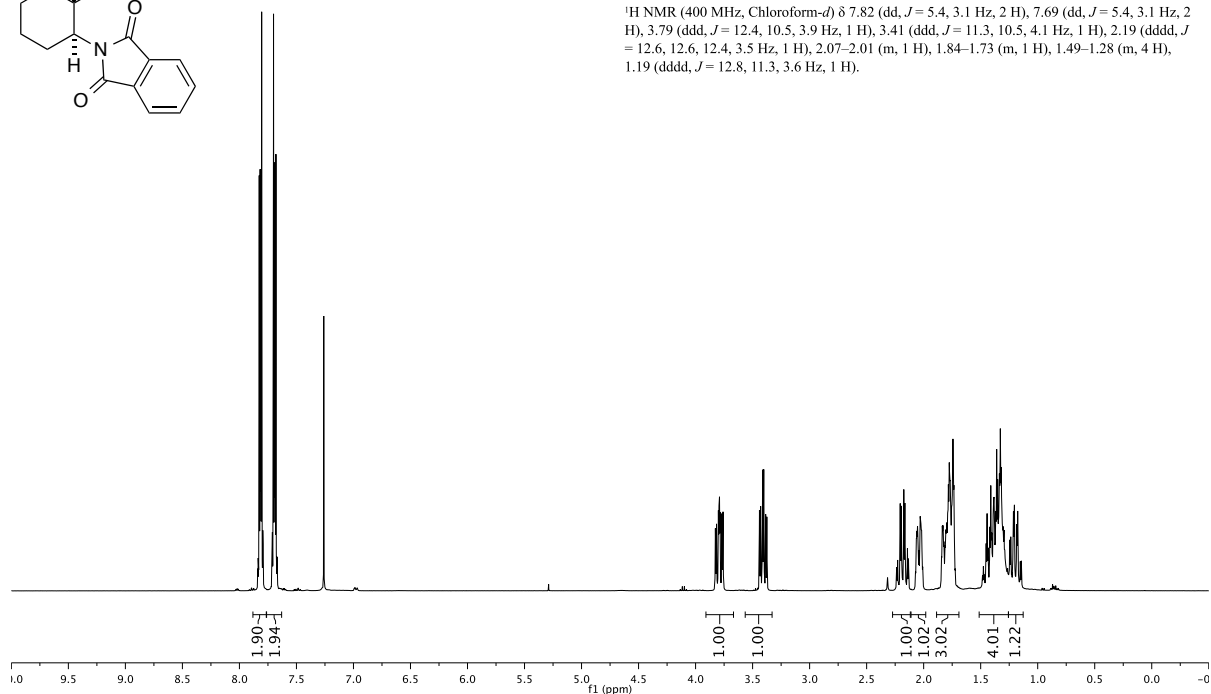

42-24-10-bhsieh.11.fid  
Sample fly-10-041  
group bode

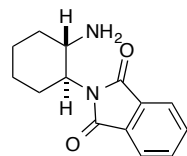

<sup>13</sup>C NMR (101 MHz, CDCl<sub>3</sub>) δ 168.9, 134.0, 132.1, 123.3, 58.7, 51.0, 36.8, 29.5, 25.8, 25.2.

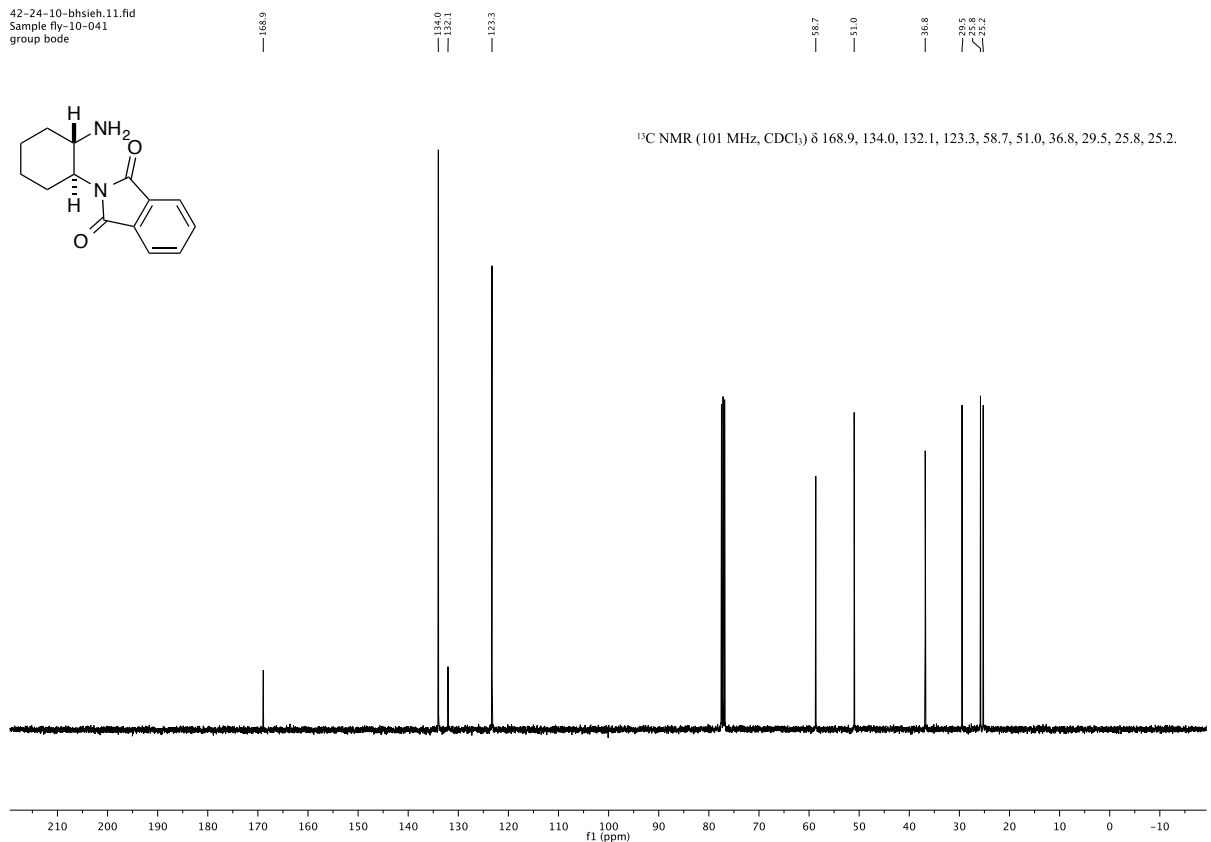



2-(*trans*-2-(Benzylideneamino)cyclohexyl)isoindoline-1,3-dione (S13)

42-25-10-bhsieh.10.fid  
Sample fly-10-059  
group bode

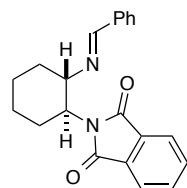

<sup>1</sup>H NMR (400 MHz, CDCl<sub>3</sub>) δ 8.09, 7.64, 7.63, 7.62, 7.62, 7.51, 7.50, 7.50, 7.49, 7.47, 7.47, 7.45, 7.45, 7.22, 7.22, 7.21, 7.19, 7.17, 7.16, 7.15, 7.15, 4.37, 4.36, 4.34, 4.33, 4.31, 4.30, 4.00, 3.98, 3.97, 3.96, 3.94, 3.93, 2.22, 2.22, 2.20, 2.19, 2.16, 2.15, 2.14, 2.13, 2.12, 1.82, 1.81, 1.80, 1.78, 1.77, 1.76, 1.75, 1.74, 1.73, 1.72, 1.71, 1.69, 1.68, 1.66, 1.65, 1.62, 1.61, 1.49, 1.48, 1.46, 1.45, 1.45, 1.44, 1.43, 1.43, 1.42, 1.41, 1.39, 1.39, 1.38, 1.35.

<sup>1</sup>H NMR (400 MHz, Chloroform-*d*) δ 8.09 (s, 1 H), 7.63 (dd, *J* = 5.4, 3.1 Hz, 2 H), 7.50 (dd, *J* = 5.4, 3.1 Hz, 2 H), 7.47–7.45 (m, 2 H), 7.22–7.15 (m, 3 H), 4.33 (ddd, *J* = 12.7, 10.6, 3.8 Hz, 1 H), 3.96 (ddd, *J* = 10.6, 10.6, 4.3 Hz, 1 H), 2.17 (dddd, *J* = 12.7, 12.7, 11.8, 3.0 Hz, 1 H), 1.82–1.61 (m, 5 H), 1.49–1.35 (m, 2 H).

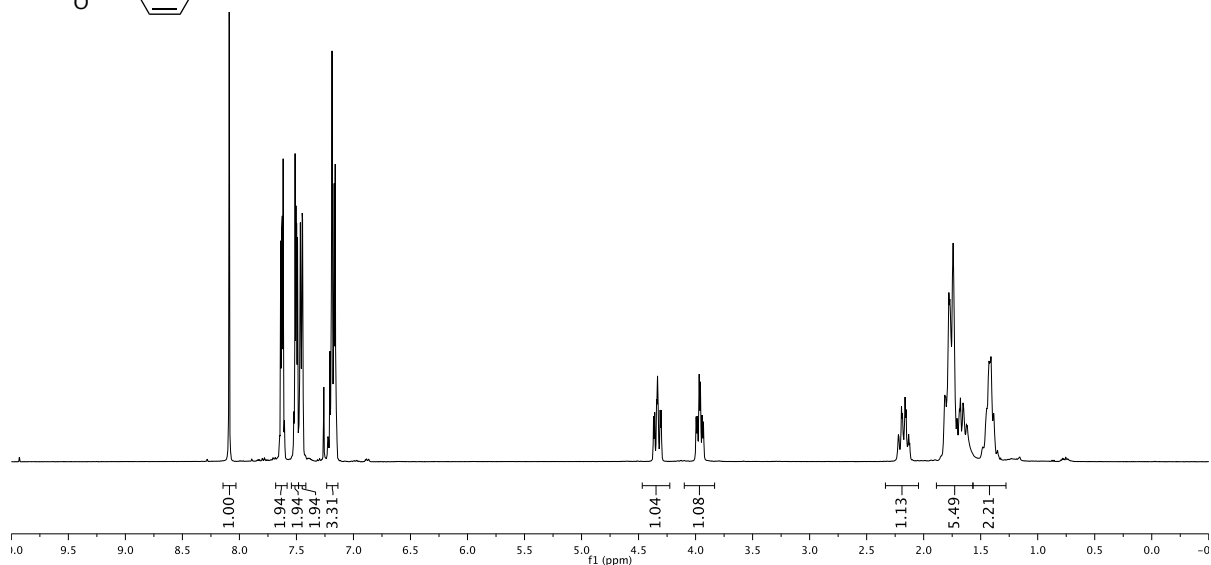

42-25-10-bhsieh.11.fid  
Sample fly-10-059  
group bode

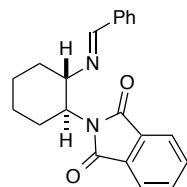

<sup>13</sup>C NMR (101 MHz, CDCl<sub>3</sub>) δ 168.6, 160.9, 136.3, 133.8, 131.9, 130.6, 128.5, 128.2, 123.1, 69.5, 55.8, 34.3, 28.9, 25.7, 24.3.

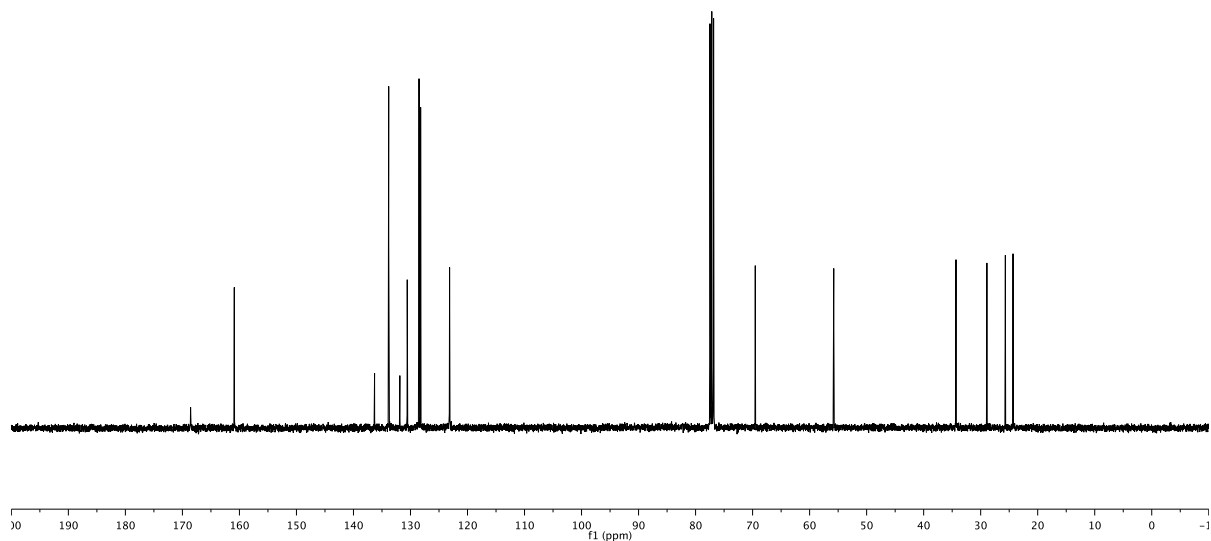

2-(*trans*-2-(Benzylamino)cyclohexyl)isoindoline-1,3-dione (S14)

5-25-08-bhsieh.10.fid  
Sample fly-10-063-CC-washed  
group bode  
PRO CDCl<sub>3</sub> /opt/v bhsieh 5

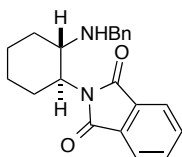

<sup>1</sup>H NMR (400 MHz, CDCl<sub>3</sub>) δ 7.81, 7.80, 7.80, 7.79, 7.71, 7.70, 7.69, 7.69, 7.10, 7.10, 7.09, 7.09, 7.08, 7.08, 7.07, 7.07, 7.06, 7.06, 7.05, 7.05, 7.05, 7.04, 3.99, 3.98, 3.96, 3.96, 3.95, 3.95, 3.93, 3.92, 3.82, 3.79, 3.61, 3.57, 3.29, 3.28, 3.26, 3.25, 3.24, 3.23, 2.31, 2.30, 2.29, 2.28, 2.28, 2.27, 2.27, 2.26, 2.25, 2.25, 2.24, 2.23, 2.22, 2.21, 2.20, 1.84, 1.84, 1.83, 1.82, 1.82, 1.82, 1.81, 1.80, 1.79, 1.79, 1.78, 1.78, 1.77, 1.77, 1.45, 1.44, 1.43, 1.41, 1.41, 1.40, 1.39, 1.38, 1.37, 1.37, 1.36, 1.36, 1.35, 1.34, 1.34, 1.34, 1.33, 1.32, 1.31, 1.30, 1.29, 1.18, 1.18, 1.17, 1.17, 1.16, 1.15, 1.15, 1.14, 1.14, 1.12, 1.12, 1.11, 1.11, 1.09, 1.09, 1.08.

<sup>1</sup>H NMR (400 MHz, Chloroform-*d*) δ 7.80 (dd, *J* = 5.5, 3.0 Hz, 2 H), 7.70 (dd, *J* = 5.5, 3.0 Hz, 2 H), 7.10–7.04 (m, 5 H), 3.96 (ddd, *J* = 12.4, 11.0, 3.9 Hz, 1 H), 3.81 (d, *J* = 13.2 Hz, 1 H), 3.59 (d, *J* = 13.2 Hz, 1 H), 3.26 (td, *J* = 11.0, 4.1 Hz, 1 H), 2.31–2.20 (m, 2 H), 1.84–1.77 (m, 3 H), 1.45–1.29 (m, 2 H), 1.18–1.08 (m, 2 H).

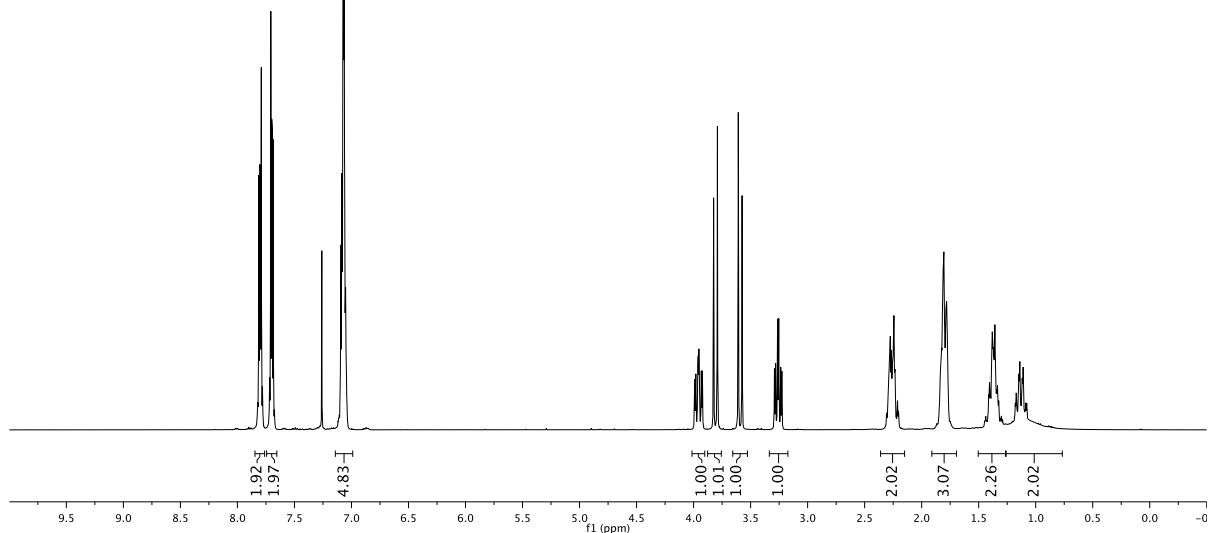

5-25-08-bhsieh.11.fid  
Sample fly-10-063-CC-washed  
group bode  
CAR CDCl<sub>3</sub> /opt/v bhsieh 5

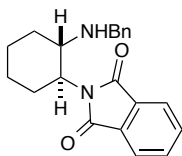

<sup>13</sup>C NMR (101 MHz, CDCl<sub>3</sub>) δ 168.9, 141.2, 133.8, 132.2, 128.2, 128.0, 126.7, 123.2, 56.5, 56.1, 50.7, 33.3, 29.6, 25.8, 25.2.

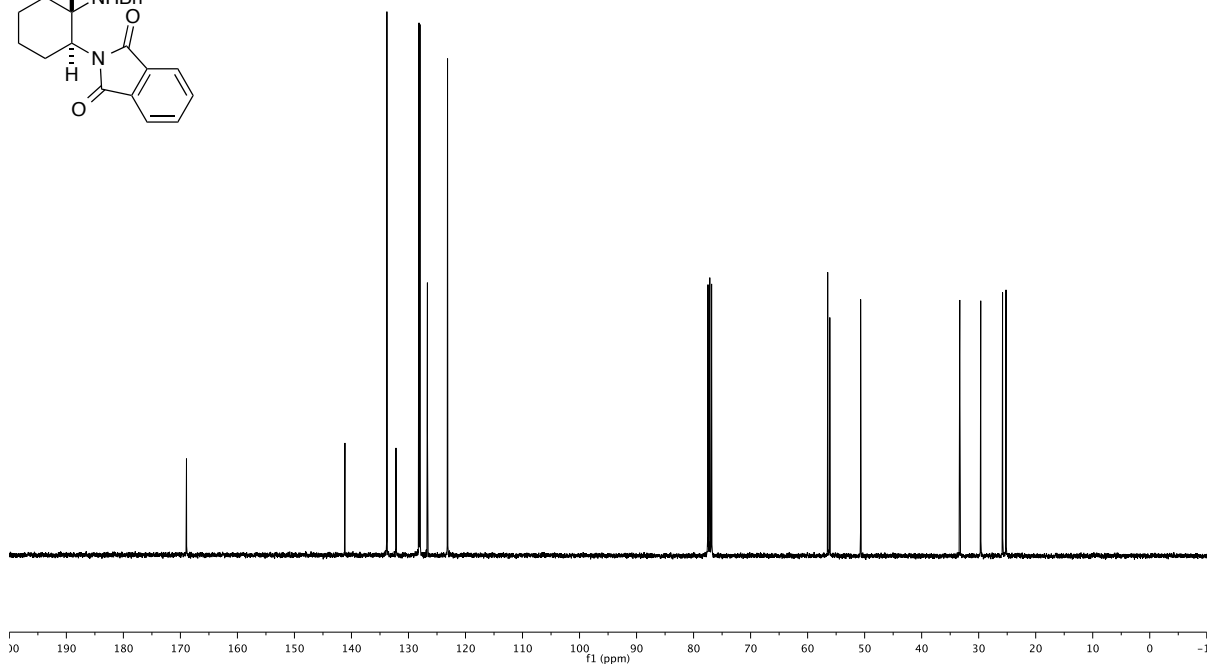

41-19-06-bhsieh.10.fid  
Sample fly-10-050-CC  
group code

<sup>1</sup>H NMR (400 MHz, Chloroform-*d*)  $\delta$  7.80–7.78 (m, 2 H), 7.73–7.70 (m, 2 H), 7.17–7.13 (m, 1 H), 7.09–7.05 (m, 2 H), 6.96–6.94 (m, 2 H), 4.20 (ddd, *J* = 12.1, 10.8, 3.9 Hz, 1 H), 3.74 (d, *J* = 13.6 Hz, 1 H), 3.25 (d, *J* = 13.6 Hz, 1 H), 3.25–3.20 (m, 1 H), 2.35–2.24 (m, 1 H), 2.13 (d, *J* = 14.2 Hz, 1 H), 2.06–2.02 (m, 1 H), 1.91 (d, *J* = 14.2 Hz, 1 H), 1.86–1.75 (m, 1 H), 1.36–1.24 (m, 3 H), –0.05 (s, 9 H).

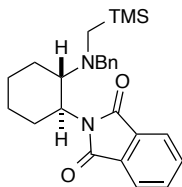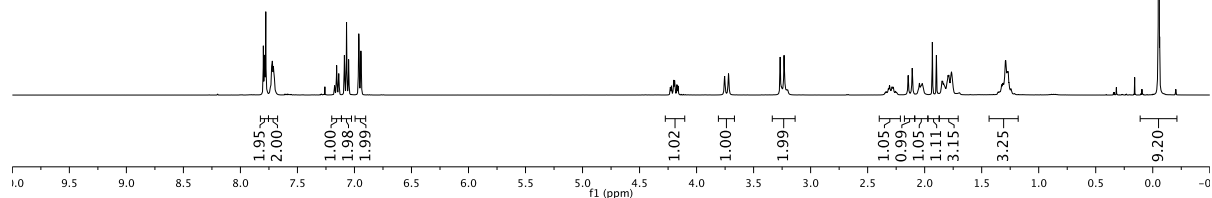

41-19-06-bhsieh.11.fid  
Sample fly-10-050-CC  
group code

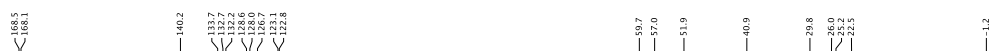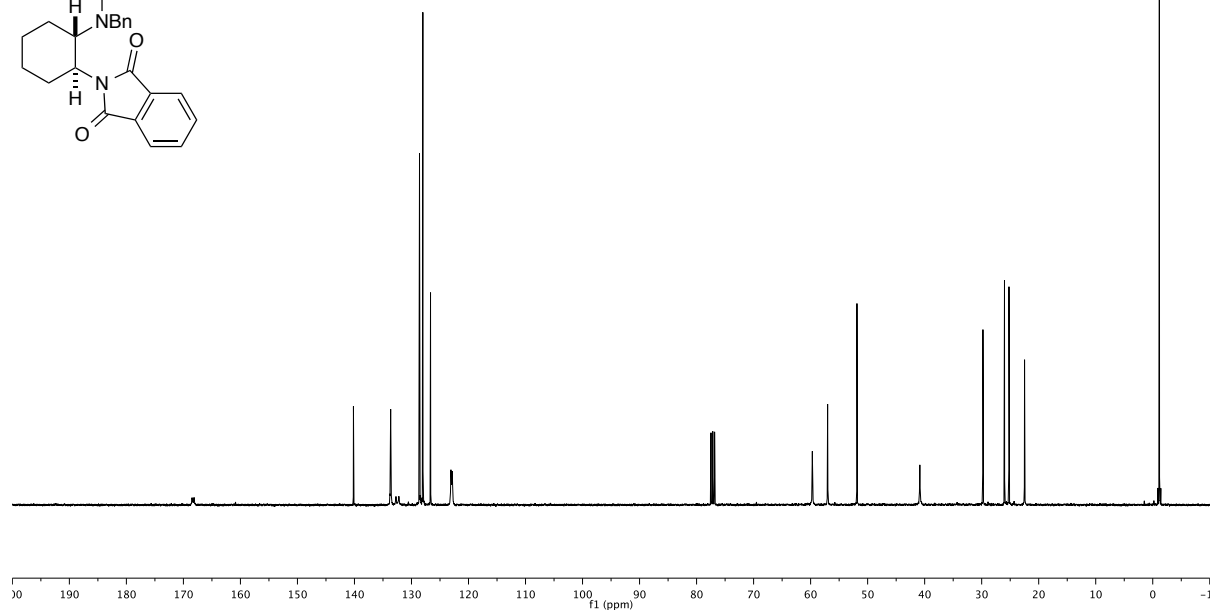

***trans*-N<sup>1</sup>-Benzyl-N<sup>1</sup>-((trimethylsilyl)methyl)cyclohexane-1,2-diamine (13)**

40-29-08-bhsieh.10.fid  
Sample fly-11-005-CC  
group bode  
PRO CDCl<sub>3</sub> /opt/v bhsieh 40

<sup>1</sup>H NMR (400 MHz, CDCl<sub>3</sub>) δ 7.31, 7.30, 7.25, 7.24, 7.24, 7.23, 7.23, 7.23, 7.22, 7.22, 7.21, 7.21, 7.20, 7.20, 3.85, 3.81, 3.28, 3.25, 2.63, 2.62, 2.60, 2.59, 2.58, 2.57, 2.12, 2.11, 2.09, 2.08, 2.08, 2.06, 2.05, 1.99, 1.99, 1.98, 1.98, 1.97, 1.97, 1.96, 1.95, 1.94, 1.91, 1.89, 1.89, 1.88, 1.88, 1.87, 1.86, 1.85, 1.85, 1.84, 1.81, 1.80, 1.79, 1.79, 1.78, 1.78, 1.77, 1.77, 1.76, 1.76, 1.76, 1.65, 1.65, 1.64, 1.64, 1.63, 1.63, 1.63, 1.62, 1.61, 1.61, 1.60, 1.25, 1.25, 1.24, 1.23, 1.22, 1.21, 1.20, 1.19, 1.18, 1.17, 1.16, 1.15, 1.14, 1.13, 1.13, 1.12, 1.11, 1.11, 1.10, 1.08, 1.08, 1.07, 1.04, 1.04, 1.03, 1.02, 1.00, 0.99, 0.99, 0.97, 0.96, 0.95, 0.94, 0.93, 0.06.

<sup>1</sup>H NMR (400 MHz, Chloroform-*d*) δ 7.30 (d, *J* = 4.4 Hz, 4 H), 7.25–7.20 (m, 1 H), 3.83 (d, *J* = 13.6 Hz, 1 H), 3.27 (d, *J* = 13.6 Hz, 1 H), 2.60 (ddd, *J* = 10.4, 10.4, 4.2 Hz, 1 H), 2.12–2.04 (m, 1 H), 2.07 (d, *J* = 14.6 Hz, 1 H), 1.93 (d, *J* = 14.6 Hz, 1 H), 1.99–1.84 (m, 4 H), 1.81–1.76 (m, 1 H), 1.65–1.60 (m, 1 H), 1.25–1.07 (m, 3 H), 1.04–0.93 (m, 1 H), 0.06 (s, 9 H).

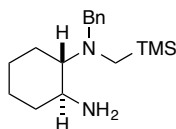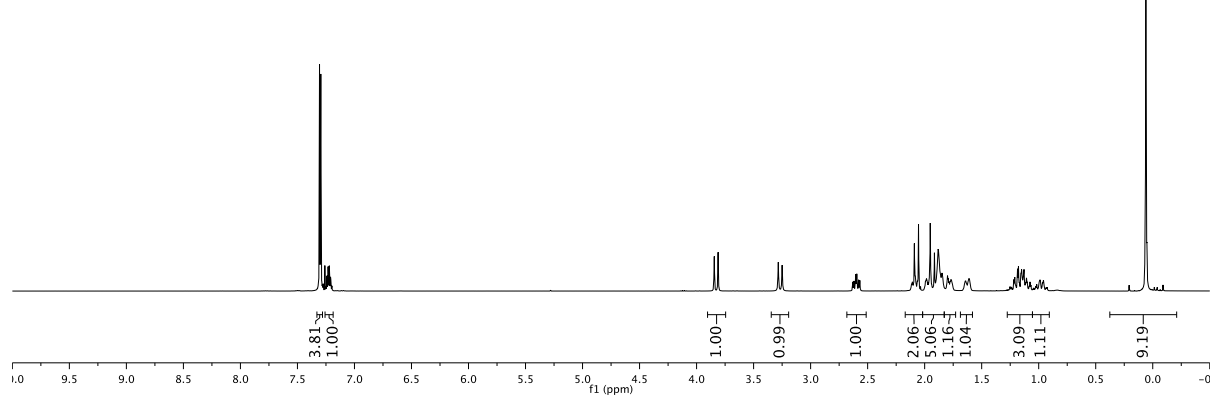

40-29-08-bhsieh.11.fid  
Sample fly-11-005-CC  
group bode  
CAR CDCl<sub>3</sub> /opt/v bhsieh 40

<sup>13</sup>C NMR (101 MHz, CDCl<sub>3</sub>) δ 140.6, 128.8, 128.4, 126.8, 67.0, 56.9, 51.6, 41.1, 35.2, 25.8, 25.3, 21.0, -1.1.

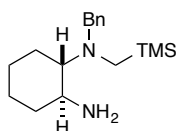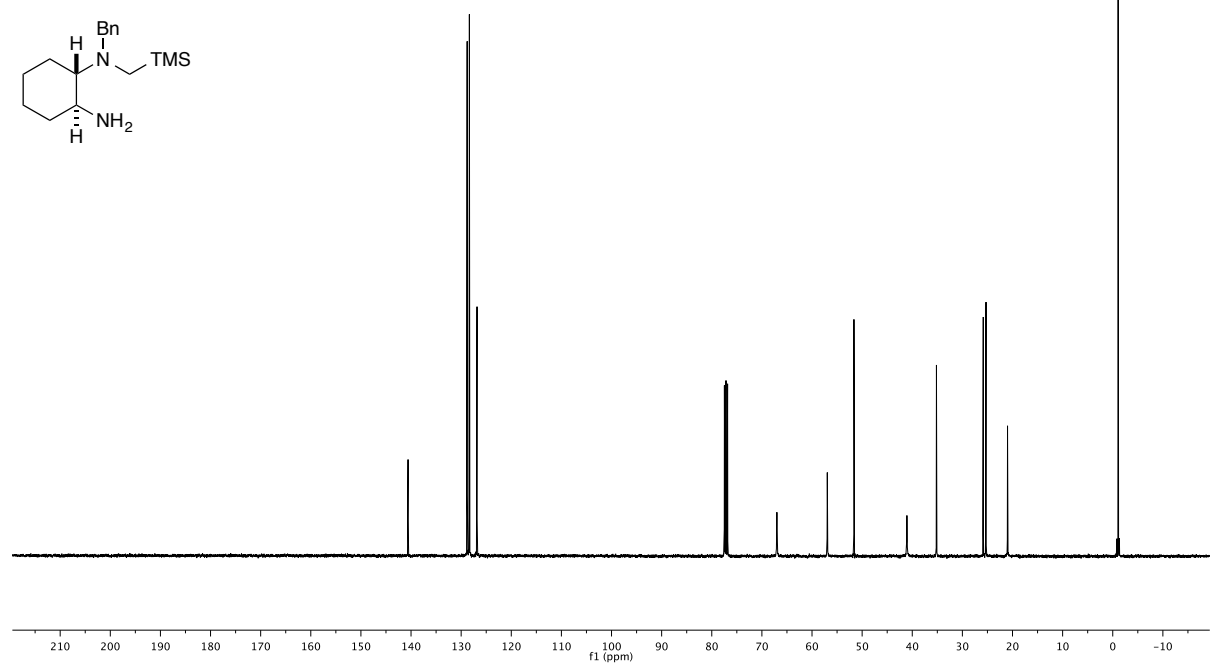

**(S)-1-((Trimethylsilyl)methyl)pyrrolidine-2-carboxamide (S16)**

15-21-08-bhsieh.10.fid  
Sample fly-10-157-CC  
group bode  
PRO CDCl<sub>3</sub> /opt/v bhsieh 15

<sup>1</sup>H NMR (400 MHz, CDCl<sub>3</sub>) δ 7.26, 7.08, 6.52, 3.13, 3.12, 3.12, 3.11, 3.11, 3.10, 3.09, 3.09, 3.09, 3.08, 2.85, 2.84, 2.83, 2.81, 2.27, 2.26, 2.25, 2.24, 2.23, 2.22, 2.21, 2.21, 2.19, 2.18, 2.16, 2.15, 2.15, 2.14, 2.13, 2.13, 2.13, 2.12, 2.11, 2.11, 2.10, 2.10, 2.09, 2.09, 2.08, 1.86, 1.82, 1.81, 1.81, 1.81, 1.80, 1.80, 1.79, 1.79, 1.79, 1.78, 1.78, 1.78, 1.77, 1.77, 1.77, 1.76, 1.76, 1.76, 1.75, 1.75, 1.74, 1.74, 1.74, 1.73, 1.72, 1.72, 1.72, 1.72, 1.71, 0.02.

<sup>1</sup>H NMR (400 MHz, Chloroform-*d*) δ 7.08 (br, 1 H), 6.52 (br, 1 H), 3.13–3.08 (m, 1 H), 2.83 (dd, *J* = 10.1, 5.2 Hz, 1 H), 2.25–2.18 (m, 1 H), 2.24 (d, *J* = 14.2 Hz, 1 H), 2.19–2.08 (m, 1 H), 1.84 (d, *J* = 14.2 Hz, 1 H), 1.81–1.71 (m, 3 H), 0.02 (s, 9 H).

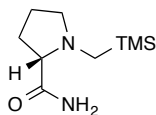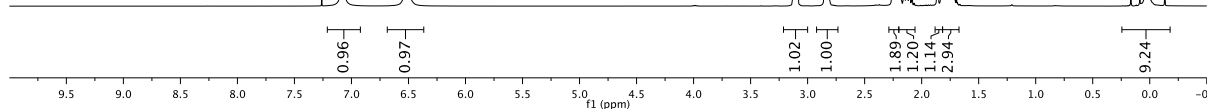

15-21-08-bhsieh.11.fid  
Sample fly-10-157-CC  
group bode  
CAR CDCl<sub>3</sub> /opt/v bhsieh 15

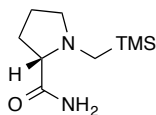

<sup>13</sup>C NMR (101 MHz, CDCl<sub>3</sub>) δ 178.8, 72.3, 56.6, 47.3, 30.4, 24.8, -1.6.

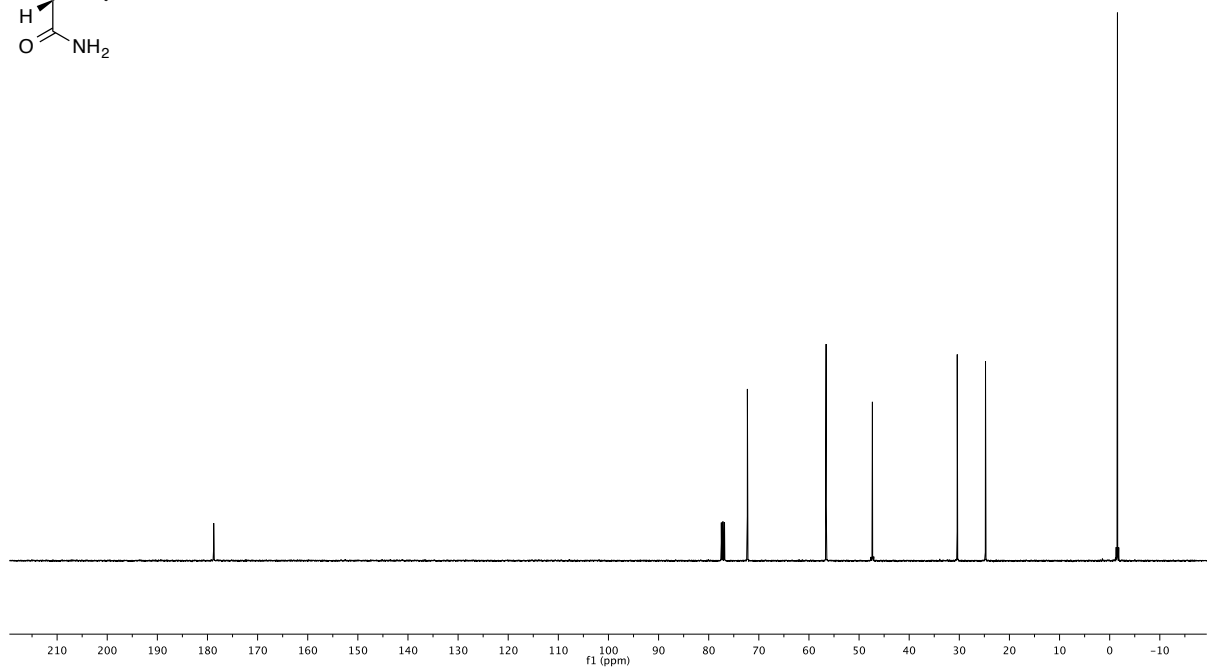

**(S)-1-((Trimethylsilyl)methyl)pyrrolidin-2-yl)methanamine (14)**

18-23-08-bhsieh.10.fid  
Sample fly-10-161  
group bode  
PRO CDCl<sub>3</sub> /opt/v bhsieh 18

<sup>1</sup>H NMR (400 MHz, CDCl<sub>3</sub>) δ 3.08, 3.07, 3.07, 3.05, 3.04, 3.03, 2.71, 2.70, 2.68, 2.67, 2.61, 2.60, 2.58, 2.58, 2.57, 2.27, 2.26, 2.23, 2.23, 2.16, 2.16, 2.15, 2.14, 2.14, 2.13, 2.12, 2.12, 2.11, 2.11, 2.10, 2.09, 2.08, 2.06, 2.06, 2.04, 2.04, 1.79, 1.79, 1.78, 1.77, 1.76, 1.75, 1.74, 1.74, 1.73, 1.72, 1.72, 1.69, 1.68, 1.67, 1.67, 1.66, 1.65, 1.65, 1.65, 1.64, 1.63, 1.63, 1.62, 1.61, 1.60, 1.60, 1.59, 1.58, 1.58, 1.57, 1.56, 1.56, 1.54, 1.53, 1.52, 1.25, 0.01.

<sup>1</sup>H NMR (400 MHz, Chloroform-*d*) δ 3.05 (ddd, *J* = 8.9, 4.4, 4.4 Hz, 1 H), 2.69 (dd, *J* = 13.0, 5.1 Hz, 1 H), 2.59 (dd, *J* = 13.0, 2.7 Hz, 1 H), 2.24 (d, *J* = 14.2 Hz, 1 H), 2.14 (dddd, *J* = 7.4, 5.1, 4.9, 2.7 Hz, 1 H), 2.07 (ddd, *J* = 8.9, 8.6, 8.6 Hz, 1H), 1.79–1.72 (m, 1 H), 1.69–1.53 (m, 3 H), 1.54 (d, *J* = 14.2 Hz, 1 H), 1.25 (br, 2 H), 0.01 (s, 9 H).

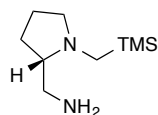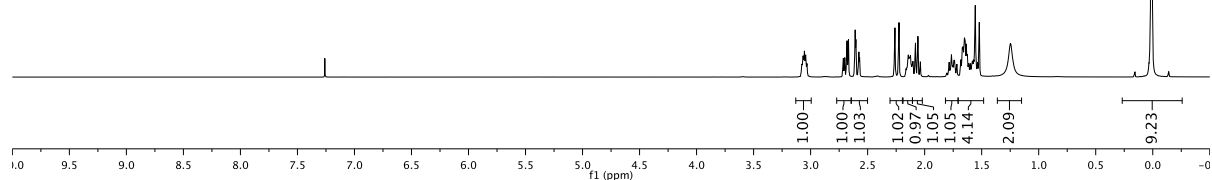

18-23-08-bhsieh.11.fid  
Sample fly-10-161  
group bode  
CAR CDCl<sub>3</sub> /opt/v bhsieh 18

<sup>13</sup>C NMR (101 MHz, CDCl<sub>3</sub>) δ 69.8, 57.3, 45.4, 43.4, 27.2, 23.3, -1.3.

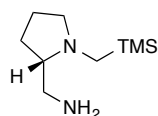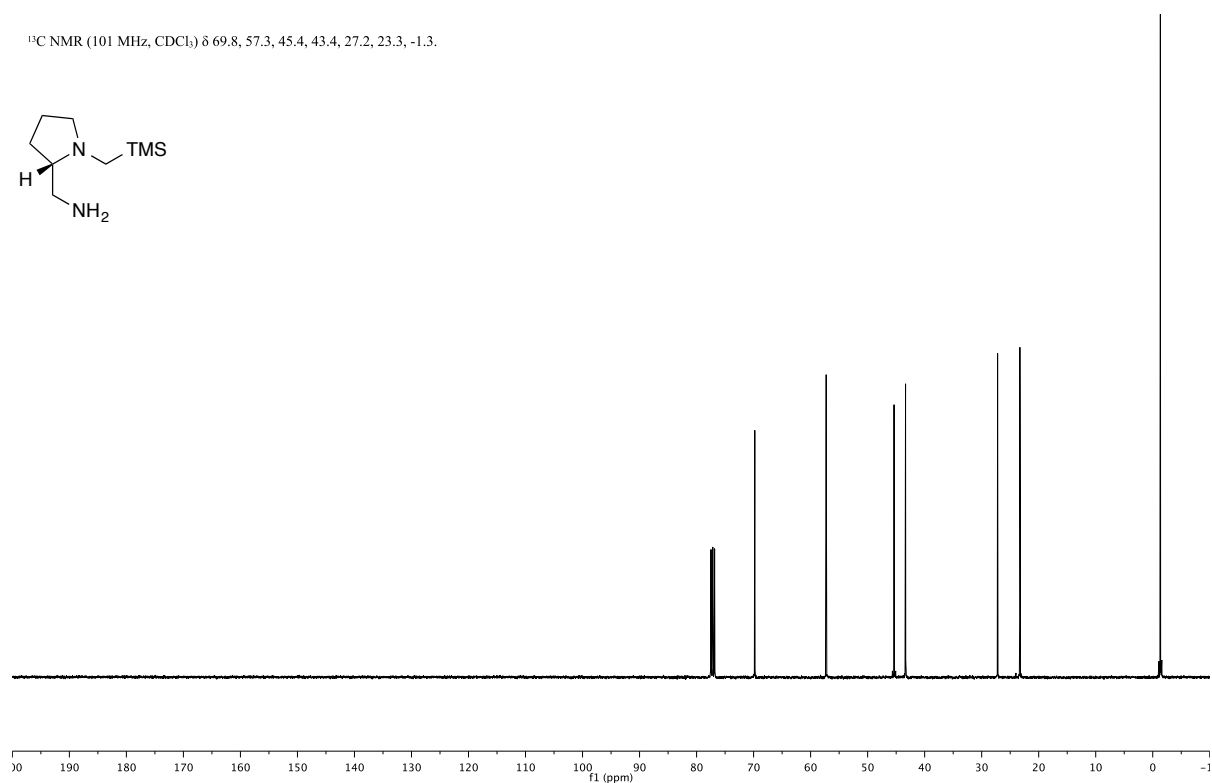

2,2,2-Trifluoro-*N*-(piperidin-2-ylmethyl)acetamide (S17)

41-24-10-bhsieh.10.fid  
Sample fly-10-154  
group bode

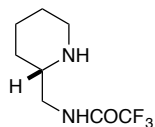

$^1\text{H}$  NMR (400 MHz,  $\text{CDCl}_3$ )  $\delta$  7.19, 3.42, 3.41, 3.39, 3.38, 3.18, 3.17, 3.15, 3.13, 3.10, 3.09, 3.08, 3.08, 3.07, 3.06, 3.06, 3.05, 3.05, 3.04, 2.78, 2.77, 2.77, 2.76, 2.75, 2.74, 2.74, 2.73, 2.72, 2.72, 2.65, 2.65, 2.62, 2.62, 2.62, 2.59, 2.59, 1.87, 1.86, 1.86, 1.86, 1.85, 1.85, 1.85, 1.84, 1.84, 1.83, 1.83, 1.82, 1.82, 1.81, 1.81, 1.80, 1.68, 1.67, 1.67, 1.66, 1.66, 1.65, 1.65, 1.64, 1.64, 1.63, 1.62, 1.62, 1.61, 1.61, 1.60, 1.60, 1.60, 1.59, 1.59, 1.58, 1.47, 1.46, 1.46, 1.44, 1.43, 1.42, 1.41, 1.40, 1.39, 1.39, 1.39, 1.38, 1.38, 1.37, 1.37, 1.36, 1.36, 1.35, 1.35, 1.34, 1.33, 1.32, 1.31, 1.30, 1.29, 1.20, 1.19, 1.17, 1.16, 1.16, 1.15, 1.14, 1.13, 1.13, 1.12, 1.11, 1.10.

$^1\text{H}$  NMR (400 MHz, Chloroform-*d*)  $\delta$  7.19 (br, 1 H), 3.40 (dd,  $J = 13.7, 4.2$  Hz, 1 H), 3.16 (dd,  $J = 13.7, 7.5$  Hz, 1 H), 3.07 (dddd,  $J = 12.4, 4.1, 2.1, 2.1$  Hz, 1H), 2.75 (dddd,  $J = 10.9, 7.5, 4.2, 2.8$  Hz, 1 H), 2.65–2.59 (m, 1 H), 1.87–1.80 (m, 1 H), 1.83 (br, 1 H), 1.68–1.58 (m, 2 H), 1.47–1.29 (m, 2 H), 1.20–1.10 (m, 1 H).

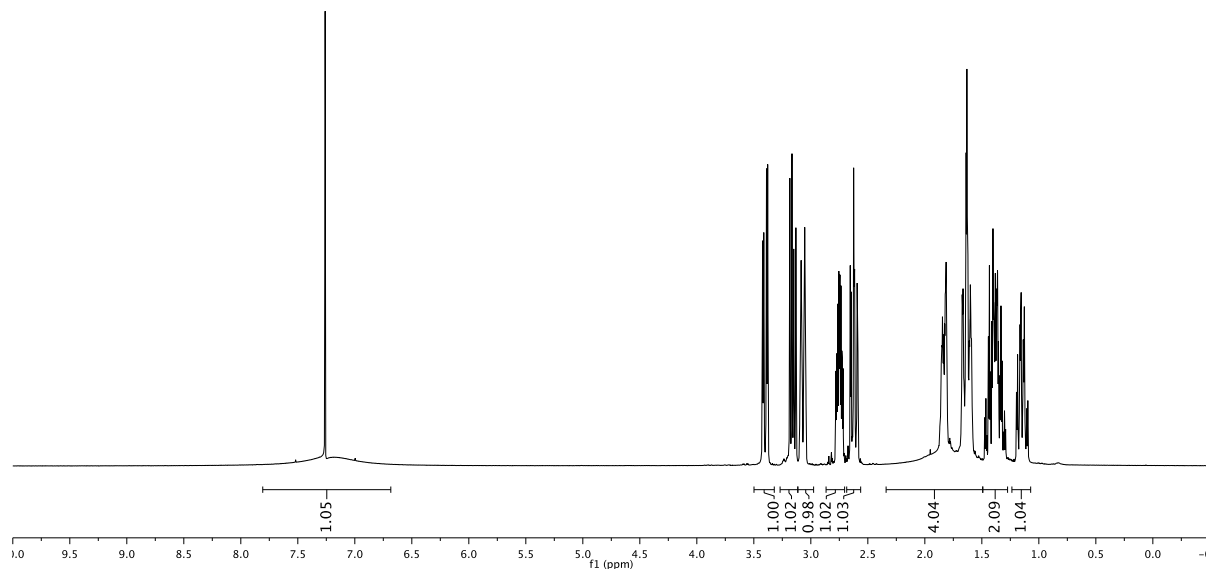

41-24-10-bhsieh.11.fid  
Sample fly-10-154  
group bode

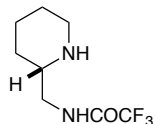

$^{13}\text{C}$  NMR (101 MHz,  $\text{CDCl}_3$ )  $\delta$  158.1, 157.7, 157.4, 157.0, 120.3, 117.5, 114.6, 111.8, 55.0, 46.5, 45.0, 30.3, 26.5, 24.1.

$^{13}\text{C}$  NMR (101 MHz, Chloroform-*d*)  $\delta$  157.6 (q,  $J = 36.8$  Hz), 116.0 (q,  $J = 287.7$  Hz), 55.0, 46.5, 45.0, 30.3, 26.5, 24.1.

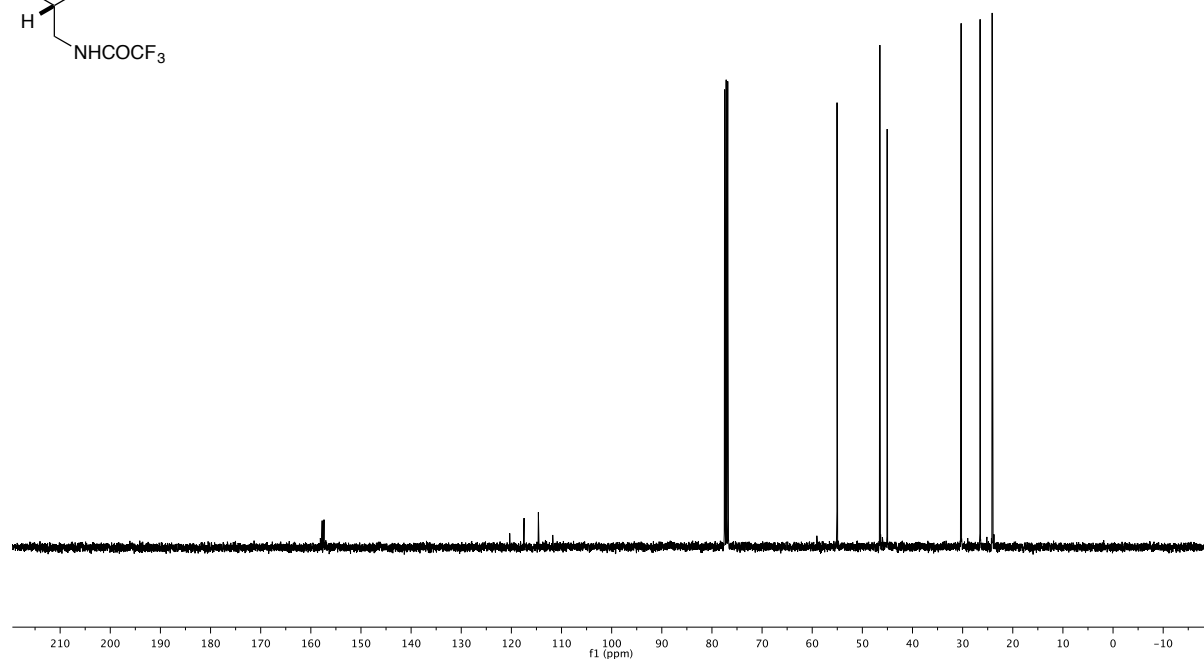

2,2,2-Trifluoro-*N*-((1-((trimethylsilyl)methyl)piperidin-2-yl)methyl)acetamide (S18)

50-24-08-bhsieh.10.fid  
Sample fly-10-156-CC  
group bode  
PRO CDCl<sub>3</sub> /opt/v bhsieh 50

<sup>1</sup>H NMR (400 MHz, CDCl<sub>3</sub>) δ 7.19, 3.51, 3.50, 3.47, 3.46, 3.32, 3.31, 3.28, 3.27, 2.98, 2.97, 2.96, 2.95, 2.94, 2.93, 2.30, 2.29, 2.28, 2.28, 2.27, 2.27, 2.26, 2.25, 2.25, 2.23, 2.20, 2.13, 2.12, 2.10, 2.10, 2.09, 2.09, 2.07, 2.06, 1.72, 1.71, 1.71, 1.70, 1.69, 1.68, 1.67, 1.65, 1.62, 1.62, 1.61, 1.61, 1.60, 1.59, 1.59, 1.58, 1.58, 1.57, 1.57, 1.47, 1.46, 1.46, 1.45, 1.44, 1.43, 1.42, 1.41, 1.40, 1.40, 1.39, 1.39, 1.38, 1.37, 1.37, 1.36, 1.36, 1.35, 1.35, 1.34, 1.33, 1.33, 1.32, 1.32, 1.31, 1.30, 1.30, 1.29, 1.28, 1.27, 0.05.

<sup>1</sup>H NMR (400 MHz, Chloroform-*d*) δ 7.19 (br, 1 H), 3.48 (dd, *J* = 13.9, 4.8 Hz, 1 H), 3.29 (dd, *J* = 13.9, 3.2 Hz, 1 H), 2.95 (ddd, *J* = 12.0, 3.8, 3.8 Hz, 1 H), 2.30–2.25 (m, 1 H), 2.21 (d, *J* = 14.3 Hz, 1 H), 2.10 (ddd, *J* = 12.0, 10.8, 2.7 Hz, 1 H), 1.72–1.67 (m, 1 H), 1.63 (d, *J* = 14.3 Hz, 1 H), 1.62–1.57 (m, 2 H), 1.47–1.27 (m, 3 H), 0.05 (s, 9 H).

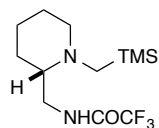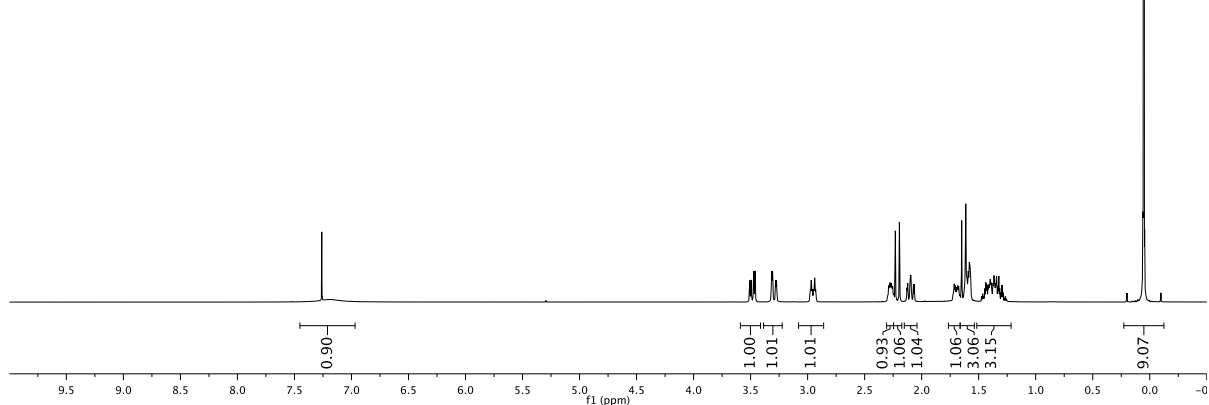

50-24-08-bhsieh.11.fid  
Sample fly-10-156-CC  
group bode  
CAR CDCl<sub>3</sub> /opt/v bhsieh 50

158.2  
157.6  
157.1

120.4  
117.5  
114.7  
111.0

60.9  
54.8

44.7  
41.6

28.5  
24.7  
23.6

-1.2

<sup>13</sup>C NMR (101 MHz, Chloroform-*d*) δ 157.6 (q, *J* = 37.1 Hz), 116.1 (q, *J* = 287.8 Hz), 60.9, 54.8, 44.7, 41.6, 28.5, 24.7, 23.6, -1.2.

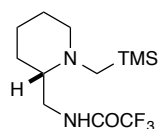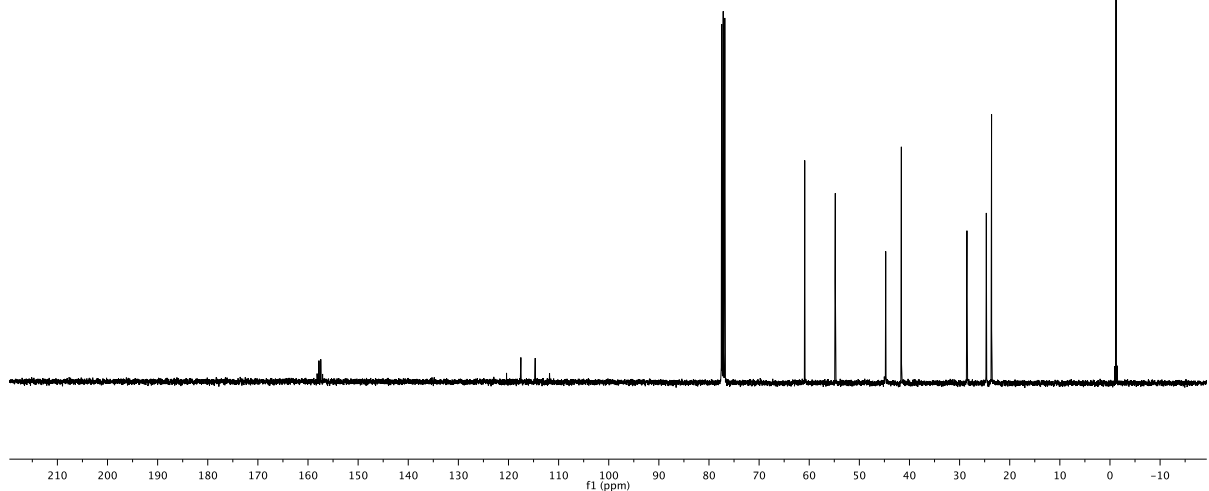



**(1-((Trimethylsilyl)methyl)piperidin-2-yl)methanamine (15)**

51-24-08-bhsieh.10.fid  
Sample fly-10-160  
group bode  
PRO CDCl<sub>3</sub> /opt/v bhsieh 51

<sup>1</sup>H NMR (400 MHz, CDCl<sub>3</sub>) δ 2.93, 2.91, 2.90, 2.89, 2.88, 2.88, 2.63, 2.63, 2.62, 2.62, 2.60, 2.59, 2.59, 2.59, 2.34, 2.30, 2.12, 2.12, 2.11, 2.11, 2.09, 2.09, 2.09, 2.08, 2.06, 2.06, 2.05, 2.02, 2.01, 2.00, 2.00, 1.99, 1.98, 1.98, 1.97, 1.97, 1.97, 1.96, 1.70, 1.69, 1.68, 1.67, 1.66, 1.65, 1.64, 1.64, 1.60, 1.56, 1.55, 1.54, 1.52, 1.51, 1.51, 1.51, 1.50, 1.50, 1.50, 1.49, 1.48, 1.48, 1.47, 1.47, 1.46, 1.45, 1.45, 1.44, 1.43, 1.43, 1.42, 1.42, 1.41, 1.32, 1.32, 1.31, 1.31, 1.30, 1.30, 1.29, 1.29, 1.28, 1.28, 1.27, 1.27, 1.27, 1.27, 1.26, 1.25, 1.25, 1.25, 1.24, 1.23, 1.22, 1.22, 1.21, 0.03.

<sup>1</sup>H NMR (400 MHz, Chloroform-*d*) δ 2.93–2.88 (m, 2 H), 2.61 (dd, *J* = 13.3, 3.4 Hz, 1 H), 2.32 (d, *J* = 14.4 Hz, 1 H), 2.09 (ddd, *J* = 12.1, 11.4, 3.3 Hz, 1 H), 2.09 (ddd, *J* = 11.7, 11.4, 3.1 Hz, 1 H), 2.02–1.96 (m, 3 H), 1.70–1.64 (m, 1 H), 1.62 (d, *J* = 14.4 Hz, 1 H), 1.56–1.43 (m, 4 H), 1.32–1.21 (m, 1 H), 0.03 (s, 9 H).

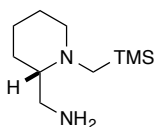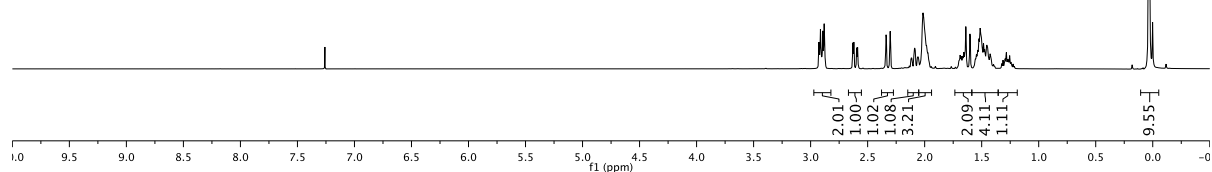

51-24-08-bhsieh.11.fid  
Sample fly-10-160  
group bode  
CAR CDCl<sub>3</sub> /opt/v bhsieh 51

<sup>13</sup>C NMR (101 MHz, CDCl<sub>3</sub>) δ 65.6, 55.7, 44.7, 43.6, 28.0, 25.1, 24.0, -0.9.

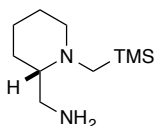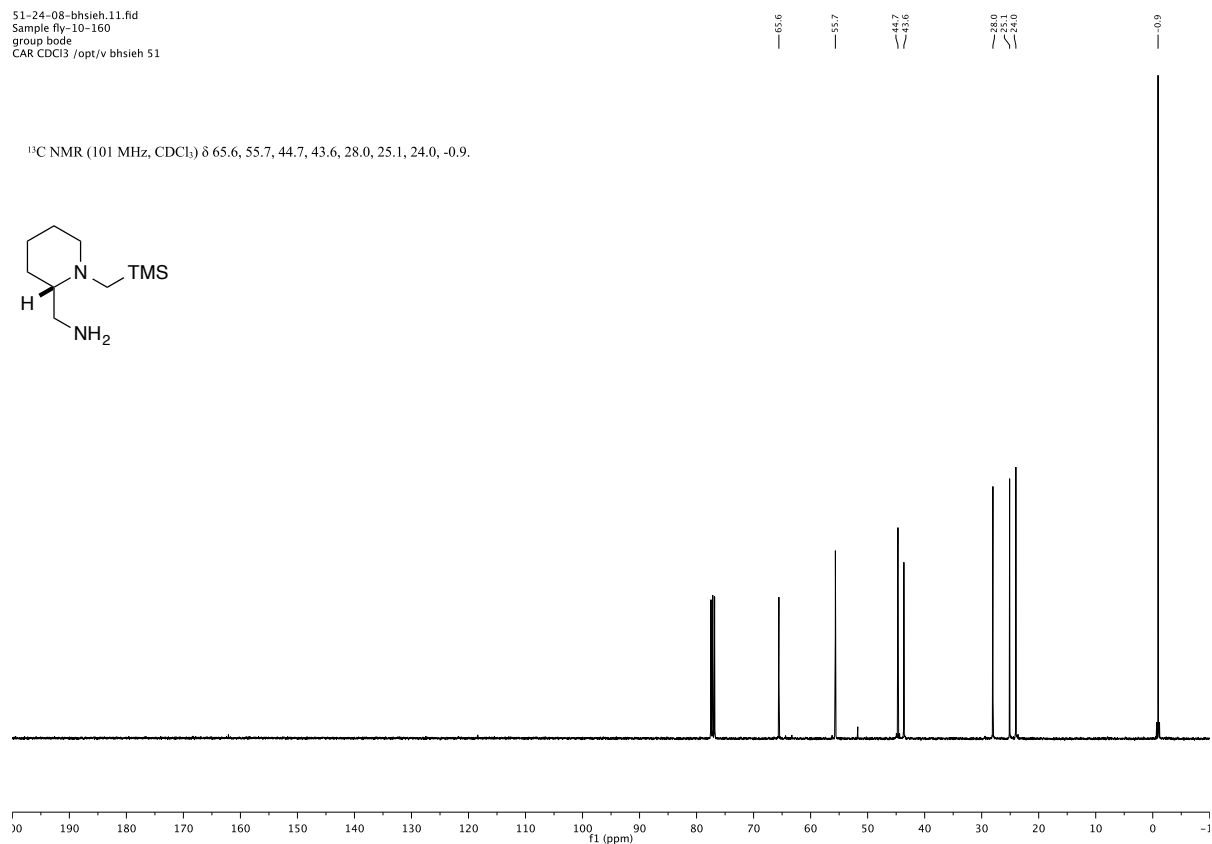

## 3-(4-Fluorophenyl)-1-phenylpiperazine (8) (Table 1, entry 3)

41-06-10-bhsieh.10.fid  
Sample fly-10-040-CC  
group bode

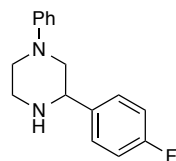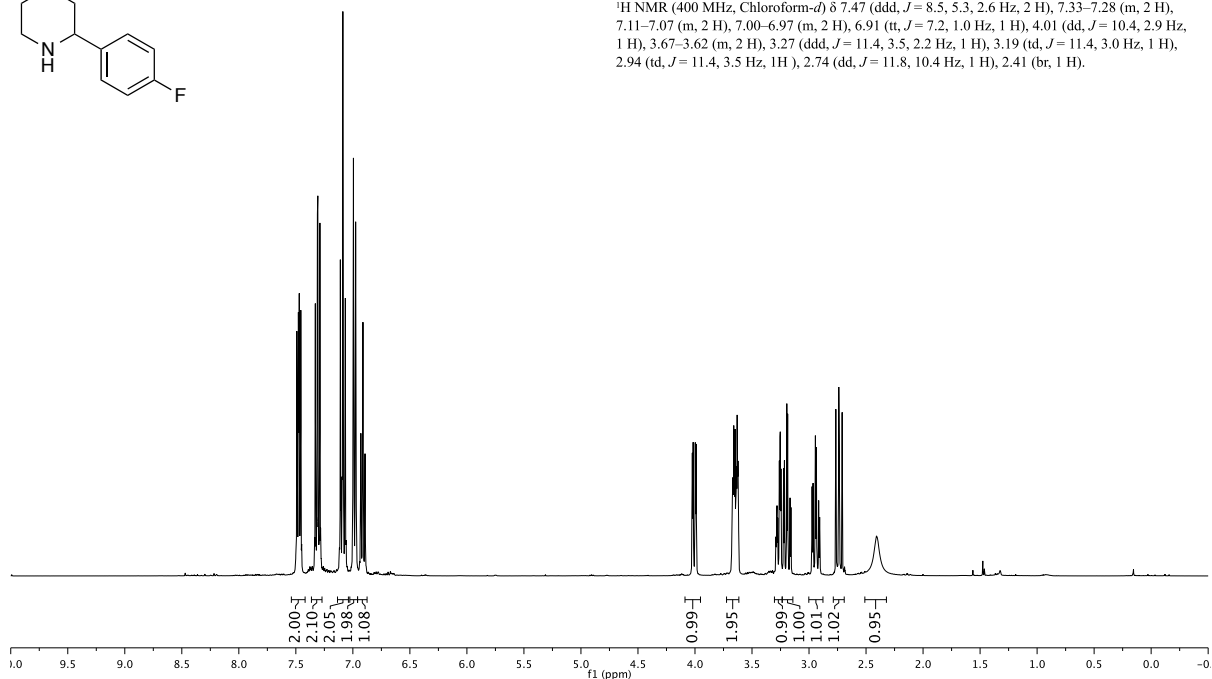

41-06-10-bhsieh.11.fid  
Sample fly-10-040-CC  
group bode

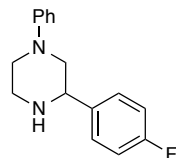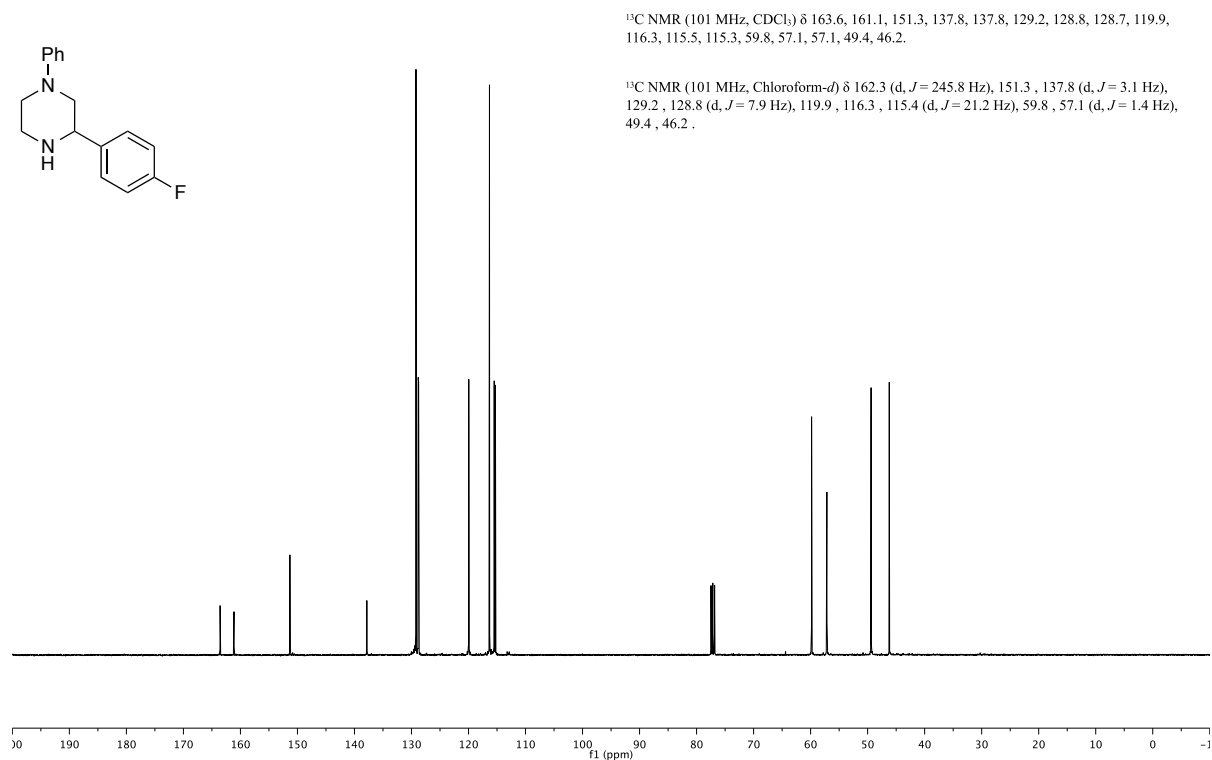

## 1-Benzyl-3-(4-fluorophenyl)piperazine (9a) (Table 1, entry 5–7 &amp; Scheme 2)

42-06-10-bhsieh.10.fid  
Sample fly-11-006-CC  
group bode

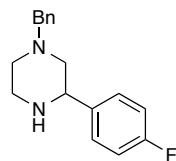

<sup>1</sup>H NMR (400 MHz, CDCl<sub>3</sub>) δ 7.39, 7.39, 7.38, 7.37, 7.36, 7.36, 7.35, 7.34, 7.34, 7.33, 7.33, 7.33, 7.30, 7.30, 7.29, 7.28, 7.28, 7.28, 7.27, 7.27, 7.04, 7.04, 7.03, 7.02, 7.01, 7.01, 7.00, 6.99, 6.99, 3.92, 3.91, 3.89, 3.89, 3.57, 3.12, 3.11, 3.10, 3.10, 3.09, 3.09, 3.09, 3.08, 3.07, 3.07, 3.04, 3.04, 2.92, 2.91, 2.91, 2.91, 2.89, 2.89, 2.88, 2.86, 2.85, 2.25, 2.24, 2.23, 2.22, 2.21, 2.21, 2.20, 2.19, 2.09, 2.07, 2.04.

<sup>1</sup>H NMR (400 MHz, Chloroform-*d*) δ 7.39–7.33 (m, 6 H), 7.30–7.27 (m, 1 H), 7.04–6.99 (m, 2 H), 3.90 (dd, *J* = 10.2, 2.8 Hz, 1 H), 3.57 (s, 2 H), 3.12–3.04 (m, 2 H), 2.93–2.84 (m, 2 H), 2.22 (ddd, *J* = 11.0, 9.7, 4.8 Hz, 1 H), 2.21 (br, 1 H), 2.07 (t, *J* = 10.2 Hz, 1 H).

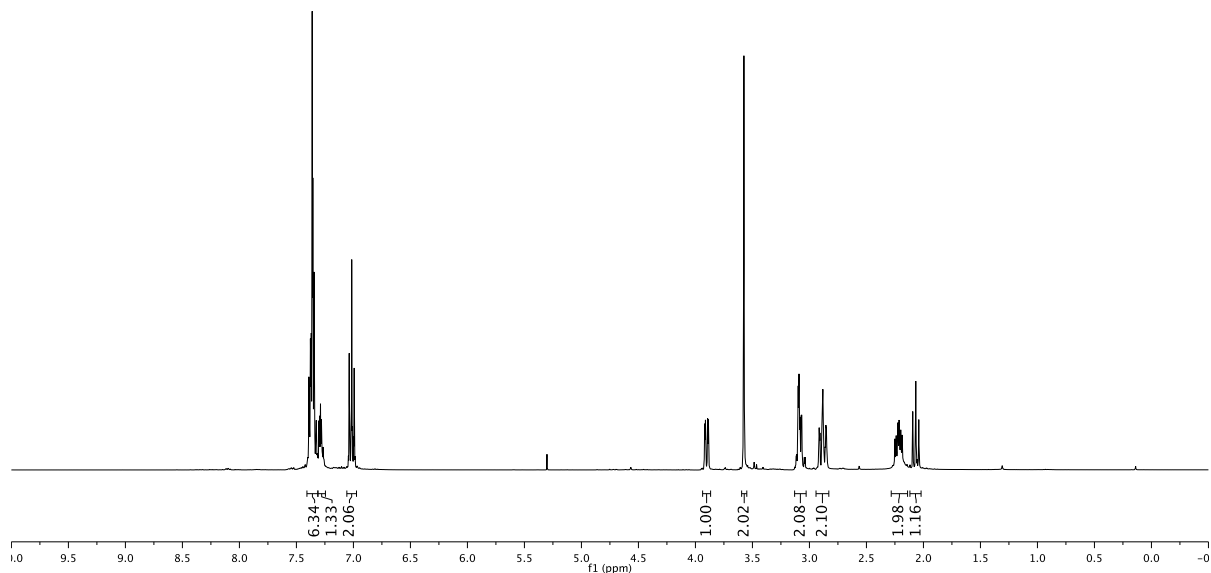

42-06-10-bhsieh.11.fid  
Sample fly-11-006-CC  
group bode

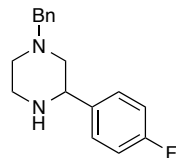

<sup>13</sup>C NMR (101 MHz, CDCl<sub>3</sub>) δ 163.4, 160.9, 138.5, 138.4, 138.0, 129.3, 128.7, 128.6, 128.3, 127.1, 115.3, 115.1, 63.3, 61.4, 61.4, 59.7, 53.2, 46.2.

<sup>13</sup>C NMR (101 MHz, Chloroform-*d*) δ 162.1 (d, *J* = 245.2 Hz), 138.5 (d, *J* = 3.1 Hz), 138.0, 129.3, 128.6 (d, *J* = 7.9 Hz), 128.3, 127.1, 115.2 (d, *J* = 21.1 Hz), 63.3, 61.4 (d, *J* = 1.2 Hz), 59.7, 53.2, 46.2.

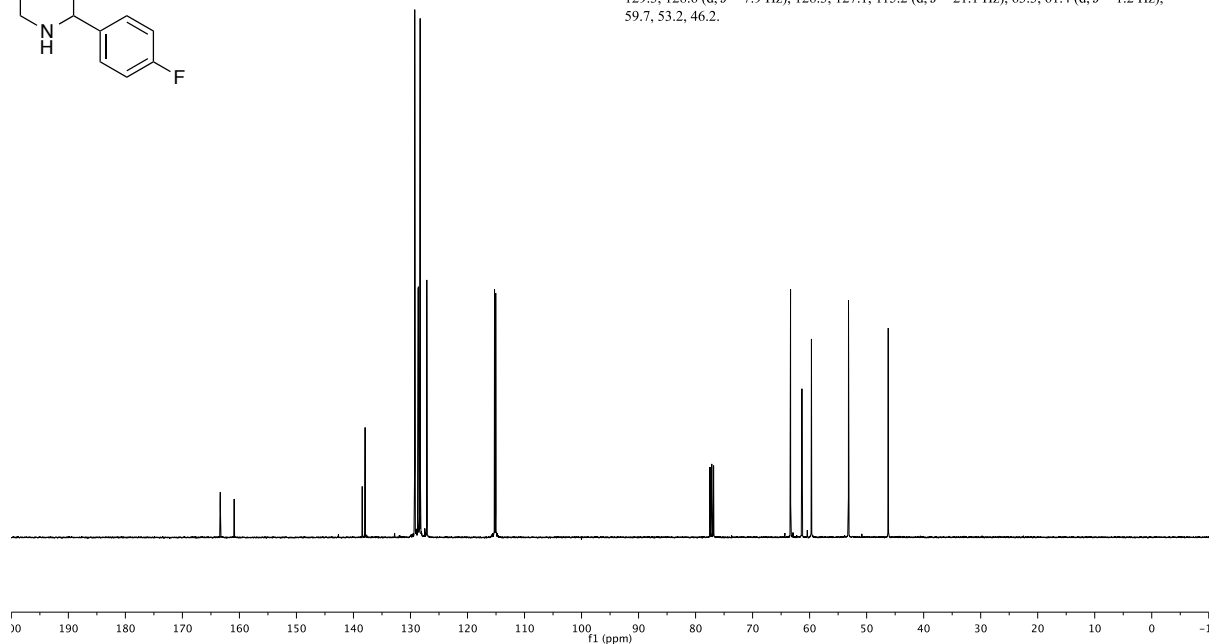

## Methyl 3-(4-benzylpiperazin-2-yl)benzoate (9b) (Scheme 2)

44-06-10-bhsieh.10.fid  
Sample fly-11-015-CC  
group bode

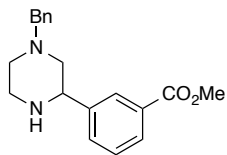

<sup>1</sup>H NMR (400 MHz, CDCl<sub>3</sub>) δ 8.09, 8.08, 8.08, 7.96, 7.96, 7.95, 7.94, 7.94, 7.93, 7.62, 7.61, 7.61, 7.60, 7.60, 7.59, 7.40, 7.39, 7.37, 7.36, 7.35, 7.34, 7.34, 7.33, 7.32, 7.32, 7.31, 7.31, 7.30, 7.30, 7.29, 7.28, 7.28, 7.27, 7.26, 7.26, 7.25, 7.25, 7.24, 7.24, 3.99, 3.98, 3.97, 3.96, 3.91, 3.56, 3.13, 3.13, 3.12, 3.11, 3.10, 3.10, 3.09, 3.09, 3.09, 3.07, 3.06, 3.06, 3.04, 3.03, 2.93, 2.93, 2.93, 2.92, 2.91, 2.90, 2.90, 2.90, 2.87, 2.87, 2.84, 2.84, 2.69, 2.28, 2.27, 2.25, 2.24, 2.24, 2.24, 2.22, 2.21, 2.15, 2.12, 2.12, 2.09.

<sup>1</sup>H NMR (400 MHz, Chloroform-*d*) δ 8.08 (t, *J* = 1.6 Hz, 1 H), 7.95 (dt, *J* = 7.8, 1.6 Hz, 1 H), 7.61 (dt, *J* = 7.7, 1.6 Hz, 1 H), 7.39 (apparent t, *J* = 7.8 Hz, 1 H), 7.36–7.24 (m, 5 H), 3.97 (dd, *J* = 10.2, 2.9 Hz, 1 H), 3.91 (s, 3 H), 3.56 (s, 2 H), 3.13–3.03 (m, 2 H), 2.93–2.84 (m, 2 H), 2.69 (br, 1 H), 2.25 (td, *J* = 10.7, 4.2 Hz, 1 H), 2.12 (dd, *J* = 11.0, 10.2 Hz, 1 H).

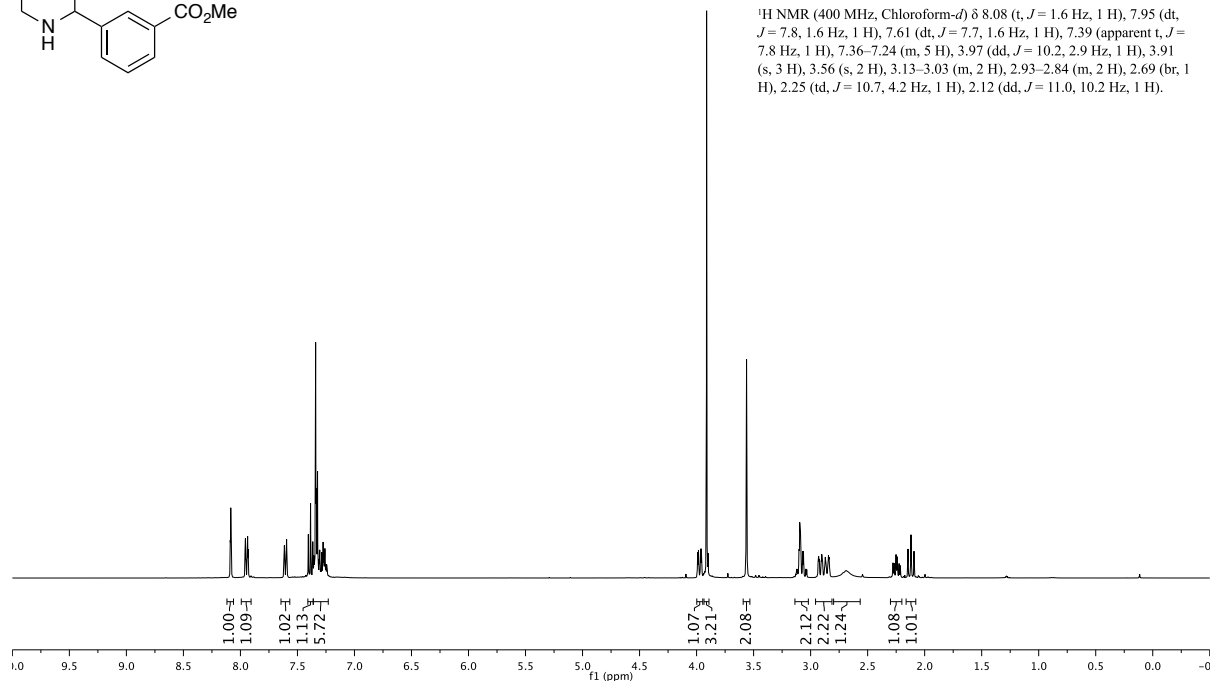

44-06-10-bhsieh.11.fid  
Sample fly-11-015-CC  
group bode

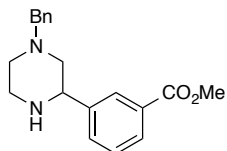

<sup>13</sup>C NMR (101 MHz, CDCl<sub>3</sub>) δ 167.0, 142.7, 137.8, 131.8, 130.3, 129.2, 128.8, 128.5, 128.30, 128.27, 127.2, 77.2, 63.3, 60.9, 60.0, 53.0, 52.1, 46.0.

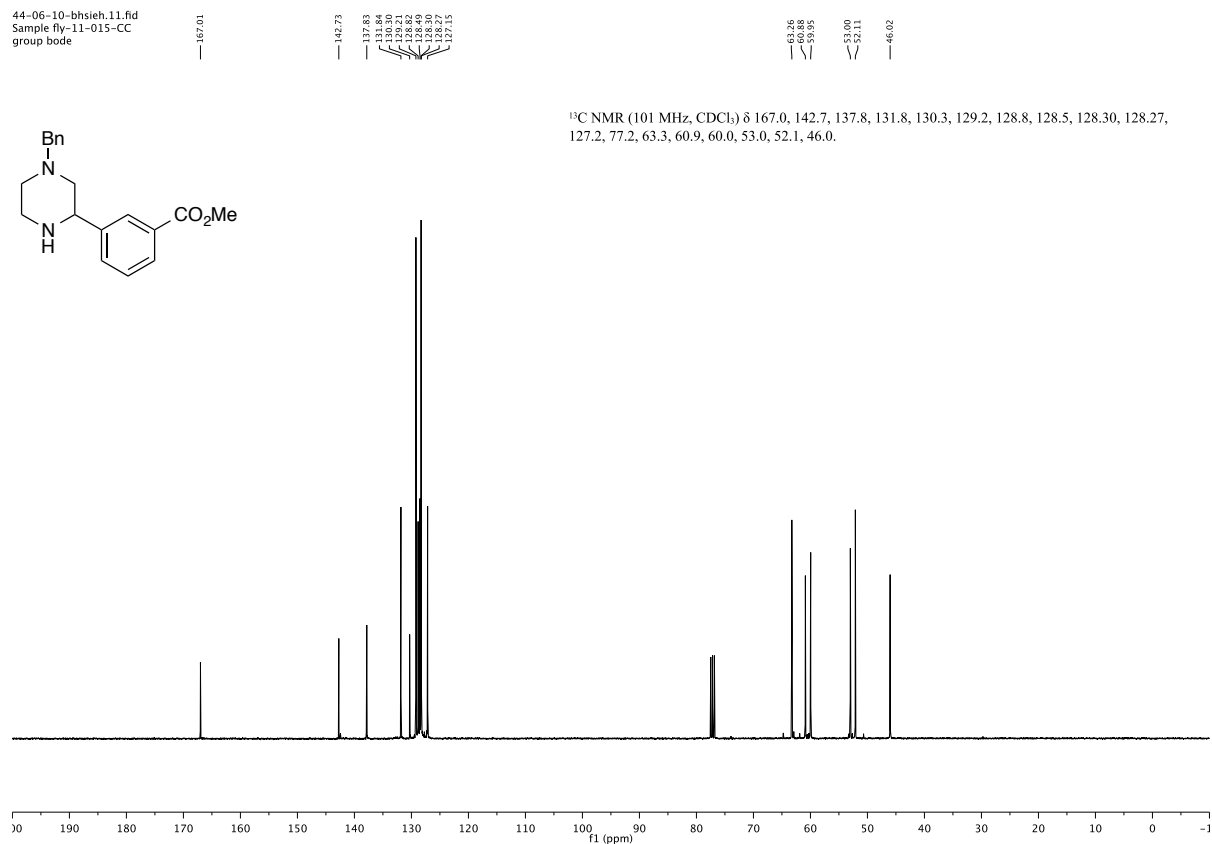

1-Benzyl-3-(*o*-tolyl)piperazine (9c) (Scheme 2)

12-08-11-bhsieh.10.fid  
Sample fly-11-012  
group bode  
PRO CDCl<sub>3</sub> /opt/v bhsieh 12

<sup>1</sup>H NMR (400 MHz, CDCl<sub>3</sub>) δ 7.57, 7.55, 7.37, 7.37, 7.35, 7.35, 7.33, 7.32, 7.31, 7.31, 7.28, 7.28, 7.27, 7.27, 7.26, 7.25, 7.25, 7.24, 7.24, 7.22, 7.22, 7.21, 7.20, 7.19, 7.18, 7.17, 7.16, 7.16, 7.14, 7.13, 7.12, 7.12, 4.14, 4.14, 4.12, 4.11, 3.62, 3.59, 3.57, 3.53, 3.13, 3.12, 3.11, 3.10, 3.10, 2.91, 2.91, 2.90, 2.90, 2.89, 2.89, 2.88, 2.88, 2.87, 2.86, 2.48, 2.35, 2.29, 2.28, 2.27, 2.27, 2.26, 2.25, 2.24, 2.23, 2.06, 2.03, 2.03, 2.01.

<sup>1</sup>H NMR (400 MHz, Chloroform-*d*) δ 7.56 (d, *J* = 7.6 Hz, 1 H), 7.37–7.31 (m, 4 H), 7.28–7.24 (m, 1 H), 7.22–7.12 (m, 3 H), 4.13 (dd, *J* = 10.0, 2.6 Hz, 1 H), 3.60 (d, *J* = 13.1 Hz, 1 H), 3.55 (d, *J* = 13.1 Hz, 1 H), 3.13–3.10 (m, 2 H), 2.91–2.86 (m, 2 H), 2.48 (br, 1 H), 2.35 (s, 3 H), 2.26 (ddd, *J* = 11.2, 9.2, 5.4 Hz, 1 H), 2.03 (dd, *J* = 11.2, 10.0 Hz, 1 H).

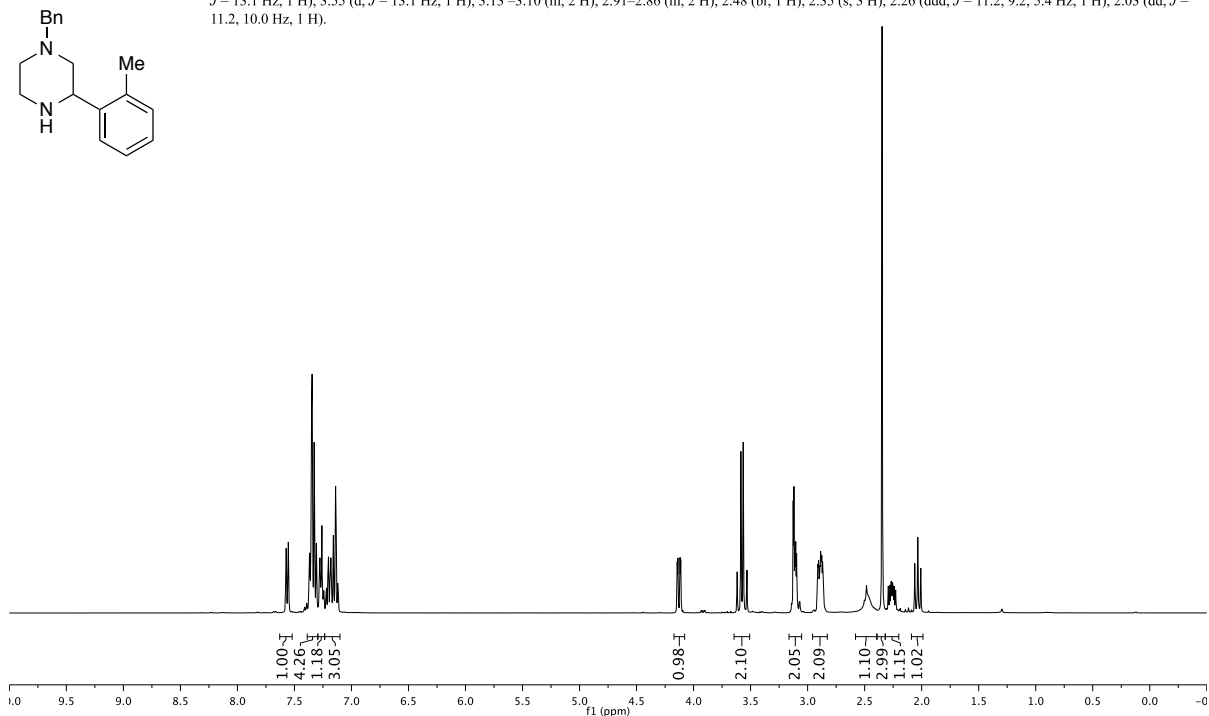

12-08-11-bhsieh.11.fid  
Sample fly-11-012  
group bode  
CAR CDCl<sub>3</sub> /opt/v bhsieh 12

140.24  
137.98  
135.41  
133.26  
128.28  
128.26  
127.11  
126.33  
126.23

63.38  
63.36  
56.40  
53.34

46.44

19.32

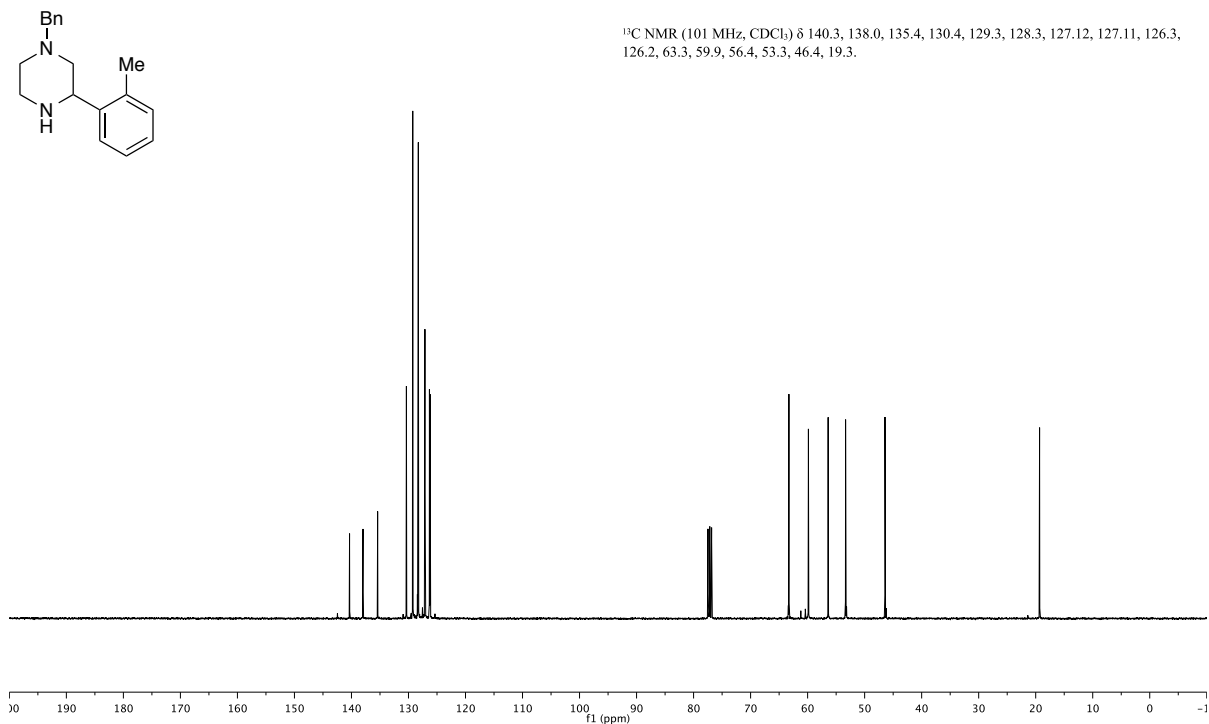

## 1-Benzyl-3-(3-methoxyphenyl)piperazine (9d) (Scheme 2)

22-14-03-bhsieh.10.fid  
Sample fly-09-072-CC  
group bode  
PRO CDCl<sub>3</sub> /opt/v bhsieh 22

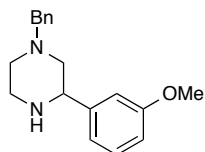

<sup>1</sup>H NMR (400 MHz, CDCl<sub>3</sub>) δ 7.38, 7.36, 7.36, 7.36, 7.35, 7.34, 7.34, 7.33, 7.33, 7.32, 7.30, 7.29, 7.29, 7.28, 7.28, 7.28, 7.27, 7.25, 7.25, 7.23, 7.23, 7.01, 7.01, 7.00, 6.99, 6.98, 6.85, 6.84, 6.84, 6.82, 6.82, 6.82, 3.93, 3.93, 3.91, 3.90, 3.82, 3.58, 3.13, 3.13, 3.12, 3.11, 3.10, 3.10, 3.09, 3.08, 3.08, 3.07, 3.05, 3.04, 2.97, 2.96, 2.96, 2.96, 2.94, 2.94, 2.93, 2.93, 2.89, 2.88, 2.88, 2.86, 2.86, 2.85, 2.55, 2.27, 2.26, 2.24, 2.23, 2.21, 2.20, 2.16, 2.13, 2.10.

<sup>1</sup>H NMR (400 MHz, Chloroform-*d*) δ 7.38–7.32 (m, 4 H), 7.30–7.23 (m, 2 H), 7.01–6.98 (m, 2 H), 6.83 (ddd, *J* = 8.2, 2.5, 1.2 Hz, 1 H), 3.92 (dd, *J* = 10.4, 2.8 Hz, 1 H), 3.82 (s, 3 H), 3.58 (s, 2 H), 3.13–3.04 (m, 2 H), 2.95 (ddd, *J* = 11.0, 2.8, 1.7 Hz, 1 H), 2.87 (dt, *J* = 10.7, 2.3 Hz, 1 H), 2.55 (br, 1 H), 2.24 (td, *J* = 10.7, 4.2 Hz, 1 H), 2.13 (apparent t, *J* = 10.4 Hz, 1 H).

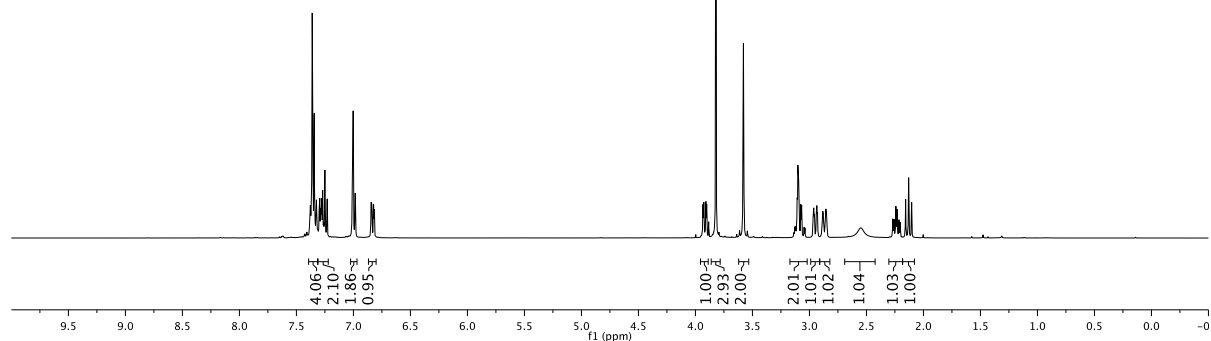

22-14-03-bhsieh.11.fid  
Sample fly-09-072-CC  
group bode  
CAR CDCl<sub>3</sub> /opt/v bhsieh 22

144.1  
138.0  
129.4  
129.3  
129.3  
127.1  
119.5  
113.1  
112.5  
63.3  
61.1  
60.4  
55.3  
53.1  
46.2

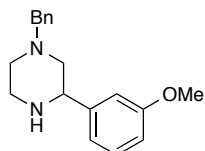

<sup>13</sup>C NMR (101 MHz, CDCl<sub>3</sub>) δ 159.7, 144.1, 138.0, 129.4, 129.3, 128.3, 127.1, 119.5, 113.1, 112.5, 63.3, 61.1, 60.4, 55.3, 53.1, 46.2.

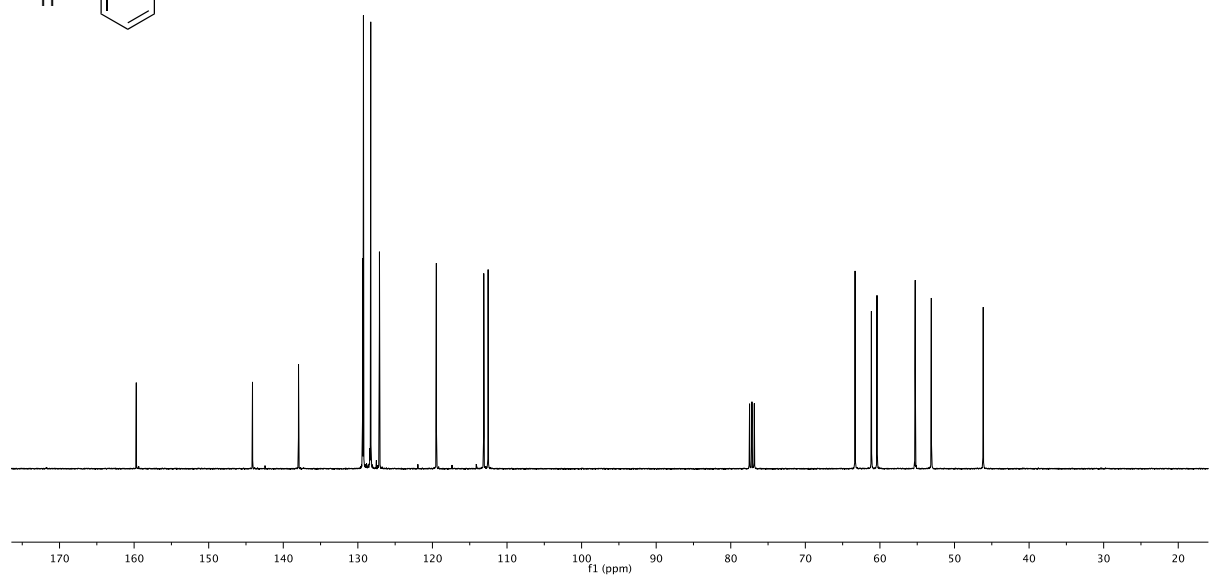

## 1-Benzyl-3-cyclopropylpiperazine (9e) (Scheme 2)

15-28-10-bhsieh.10.fid  
Sample fly-11-008  
group bode  
PRO CDCl<sub>3</sub> /opt/v bhsieh 15

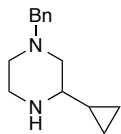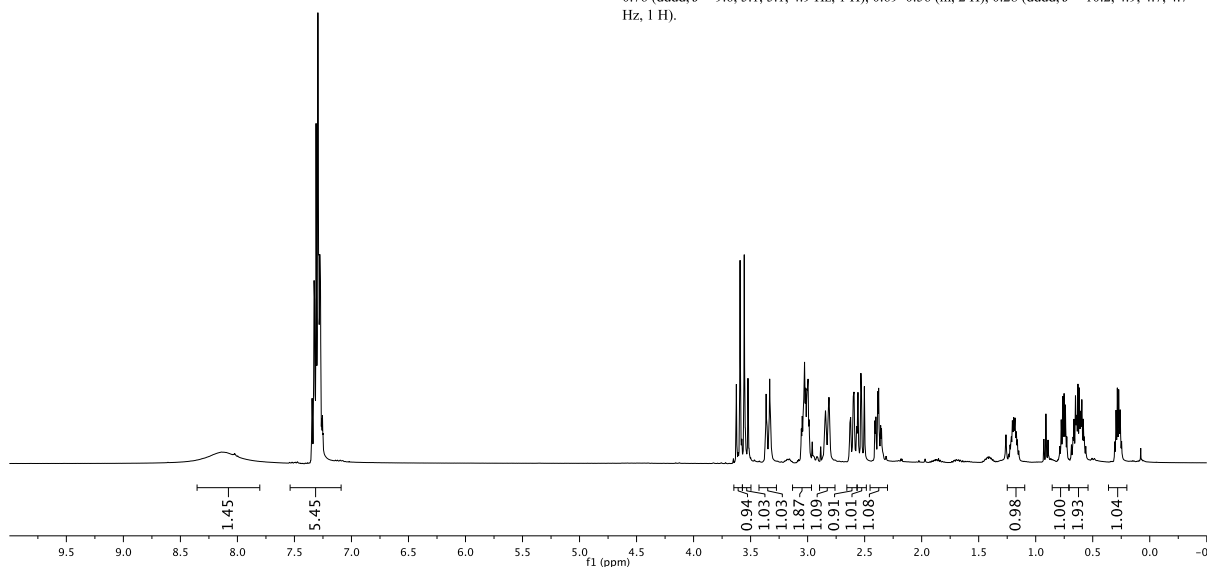

<sup>1</sup>H NMR (400 MHz, CDCl<sub>3</sub>) δ 8.13, 7.35, 7.35, 7.34, 7.33, 7.33, 7.32, 7.32, 7.31, 7.29, 7.29, 7.29, 7.28, 7.27, 7.26, 7.26, 7.25, 7.25, 3.63, 3.59, 3.56, 3.52, 3.37, 3.36, 3.36, 3.34, 3.33, 3.33, 3.06, 3.05, 3.04, 3.04, 3.03, 3.03, 3.02, 3.01, 3.01, 3.00, 3.00, 2.99, 2.85, 2.84, 2.82, 2.81, 2.63, 2.62, 2.60, 2.59, 2.57, 2.56, 2.56, 2.53, 2.53, 2.50, 2.41, 2.40, 2.38, 2.38, 2.36, 2.35, 1.24, 1.23, 1.22, 1.21, 1.21, 1.20, 1.19, 1.18, 1.18, 1.17, 1.17, 1.16, 1.15, 0.79, 0.78, 0.76, 0.75, 0.74, 0.73, 0.69, 0.67, 0.66, 0.65, 0.64, 0.64, 0.63, 0.62, 0.62, 0.61, 0.60, 0.60, 0.58, 0.58, 0.57, 0.56, 0.31, 0.30, 0.28, 0.27, 0.26, 0.25.

<sup>1</sup>H NMR (400 MHz, Chloroform-*d*) δ 8.13 (br, 1 H), 7.35–7.25 (m, 5 H), 3.61 (d, *J* = 13.1 Hz, 1 H), 3.54 (d, *J* = 13.1 Hz, 1 H), 3.35 (ddd, *J* = 12.4, 2.9, 2.9 Hz, 1 H), 3.06–2.99 (m, 2 H), 2.83 (dd, *J* = 12.4, 1.9 Hz, 1 H), 2.60 (ddd, *J* = 11.9, 11.8, 2.9 Hz, 1 H), 2.53 (dd, *J* = 12.1, 10.0 Hz, 1 H), 2.38 (ddd, *J* = 10.0, 9.7, 3.1 Hz, 1 H), 1.19 (apparent dddd, *J* = 12.9, 9.7, 8.1, 4.8 Hz, 1 H), 0.76 (dddd, *J* = 9.6, 5.1, 5.1, 4.9 Hz, 1 H), 0.69–0.56 (m, 2 H), 0.28 (dddd, *J* = 10.2, 4.9, 4.7, 4.7 Hz, 1 H).

15-28-10-bhsieh.11.fid  
Sample fly-11-008  
group bode  
CAR CDCl<sub>3</sub> /opt/v bhsieh 15

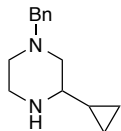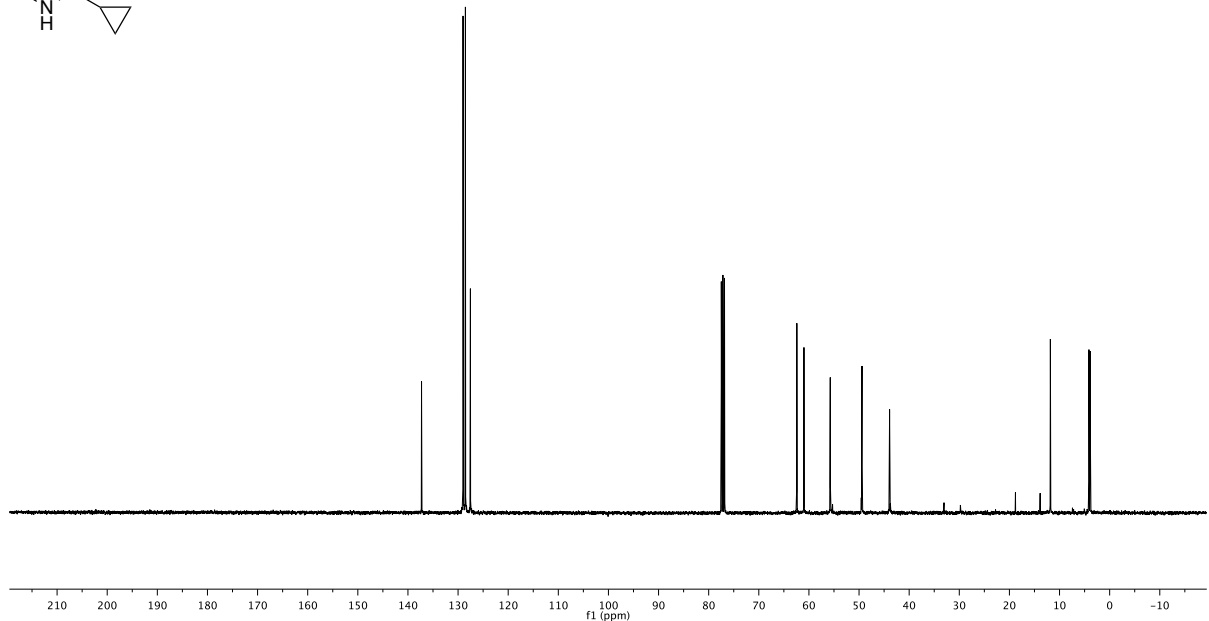

<sup>13</sup>C NMR (101 MHz, CDCl<sub>3</sub>) δ 137.3, 129.0, 128.5, 127.5, 62.4, 61.0, 55.7, 49.4, 43.9, 11.8, 4.1, 3.9.

## 1-Benzyl-3-isobutylpiperazine (9f) (Scheme 2)

4-07-04-bhsieh.10.fid  
Sample fly-09-094-CC  
group bode  
PRO CDCl<sub>3</sub> /opt/v bhsieh 4

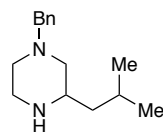

<sup>1</sup>H NMR (400 MHz, CDCl<sub>3</sub>) δ 7.30, 7.30, 7.30, 7.29, 7.28, 7.27, 7.25, 7.24, 7.24, 7.23, 7.23, 7.22, 7.22, 7.21, 4.43, 3.54, 3.50, 3.47, 3.44, 3.05, 3.04, 3.03, 3.02, 3.01, 3.00, 2.94, 2.94, 2.93, 2.92, 2.92, 2.92, 2.91, 2.91, 2.91, 2.90, 2.89, 2.89, 2.88, 2.88, 2.88, 2.87, 2.81, 2.81, 2.81, 2.80, 2.79, 2.78, 2.77, 2.77, 2.76, 2.76, 2.76, 2.75, 2.74, 2.73, 2.73, 2.18, 2.17, 2.15, 2.14, 2.12, 2.11, 1.87, 1.85, 1.85, 1.82, 1.71, 1.69, 1.69, 1.67, 1.67, 1.66, 1.64, 1.64, 1.63, 1.62, 1.61, 1.39, 1.37, 1.36, 1.34, 1.32, 1.27, 1.25, 1.25, 1.23, 1.22, 1.21, 1.20, 0.88, 0.87, 0.86, 0.86.

<sup>1</sup>H NMR (400 MHz, Chloroform-*d*) δ 7.30–7.27 (m, 4 H), 7.25–7.21 (m, 1 H), 4.43 (br, 1 H), 3.49 (apparent q, *J* = 13.0 Hz, 2 H), 3.03 (dt, *J* = 12.1, 2.9 Hz, 1 H), 2.94–2.87 (m, 2 H), 2.81–2.73 (m, 2 H), 2.15 (apparent td, *J* = 11.3, 3.2 Hz, 1 H), 1.85 (dd, *J* = 11.3, 9.9 Hz, 1 H), 1.66 (apparent dh, *J* = 7.8, 6.6 Hz, 1 H), 1.36 (apparent dt, *J* = 14.0, 7.1 Hz, 1 H), 1.23 (ddd, *J* = 14.0, 7.8, 6.3 Hz, 1 H), 0.88 (d, *J* = 2.6 Hz, 3 H), 0.86 (d, *J* = 2.6 Hz, 3 H).

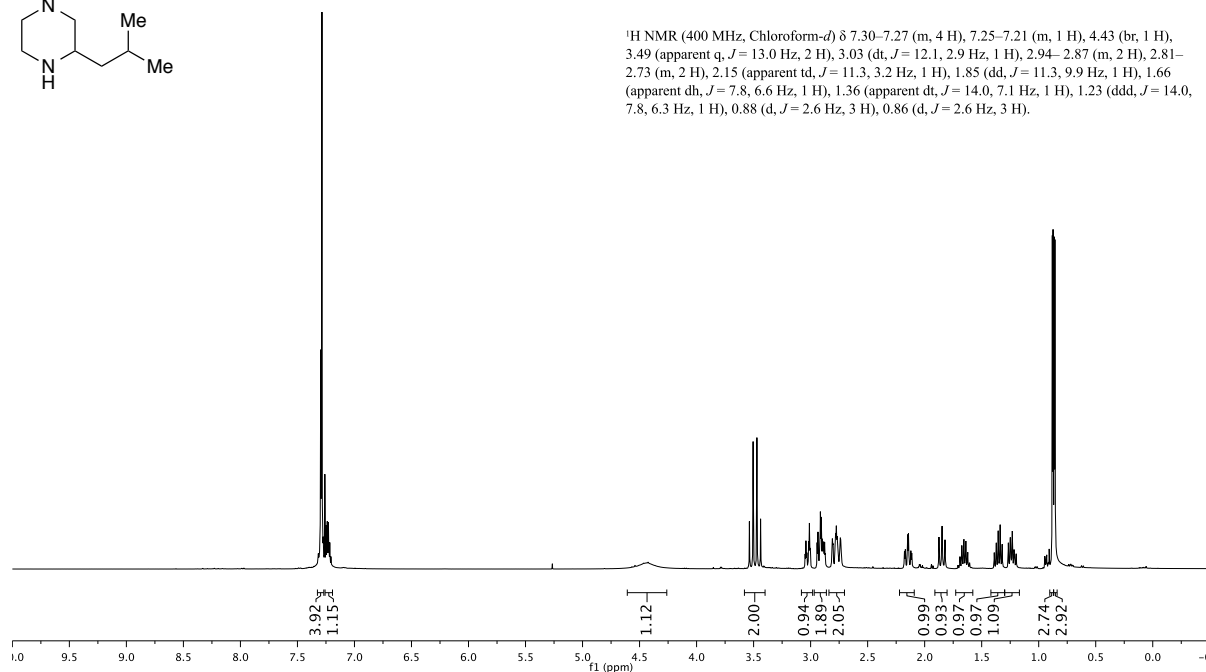

4-07-04-bhsieh.11.fid  
Sample fly-09-094-CC  
group bode  
CAR CDCl<sub>3</sub> /opt/v bhsieh 4

137.9  
129.2  
127.2

63.3  
59.2  
53.2  
52.8

45.3  
42.7

24.3  
23.0  
22.6

<sup>13</sup>C NMR (101 MHz, CDCl<sub>3</sub>) δ 137.9, 129.2, 128.3, 127.2, 63.3, 59.2, 53.2, 52.8, 45.3, 42.7, 24.3, 23.0, 22.6.

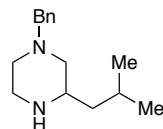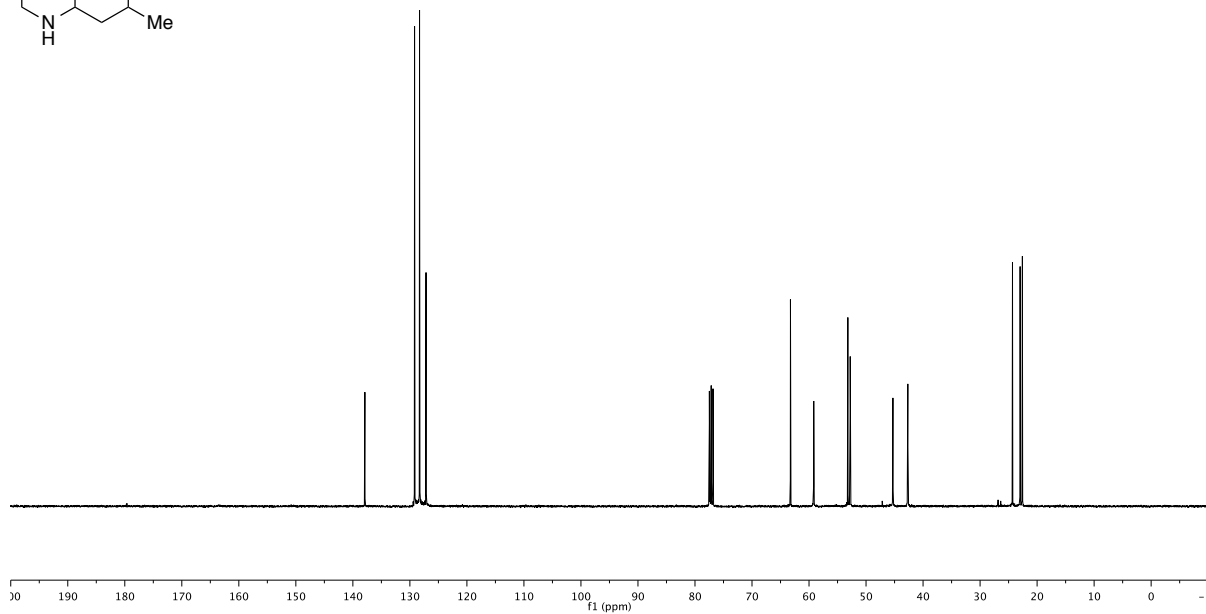



## 4-Benzyl-9-oxa-1,4-diazaspiro[5.5]undecane (9g) (Scheme 2)

41-08-10-bhsieh.10.fid  
Sample fly-10-145-cyoxo-CC  
group bode

<sup>1</sup>H NMR (400 MHz, CDCl<sub>3</sub>) δ 7.35, 7.35, 7.35, 7.34, 7.33, 7.33, 7.32, 7.32, 7.31, 7.31, 7.31, 7.29, 7.29, 7.28, 7.28, 7.27, 7.26, 7.26, 6.47, 3.85, 3.84, 3.83, 3.82, 3.81, 3.80, 3.53, 3.44, 3.42, 3.41, 3.39, 3.38, 3.12, 3.11, 3.10, 2.66, 2.65, 2.64, 2.63, 2.50, 1.94, 1.93, 1.92.

<sup>1</sup>H NMR (400 MHz, Chloroform-*d*) δ 7.35–7.26 (m, 5 H), 6.47 (br, 1 H), 3.83 (dt, *J* = 12.0, 4.9 Hz, 2 H), 3.53 (s, 2 H), 3.41 (dt, *J* = 12.0, 6.0 Hz, 2 H), 3.11 (apparent t, *J* = 5.2 Hz, 2 H), 2.65 (dd, *J* = 6.8, 3.8 Hz, 2 H), 2.50 (br, 2 H), 1.93 (apparent t, *J* = 5.5 Hz, 4 H).

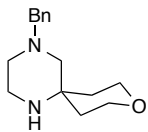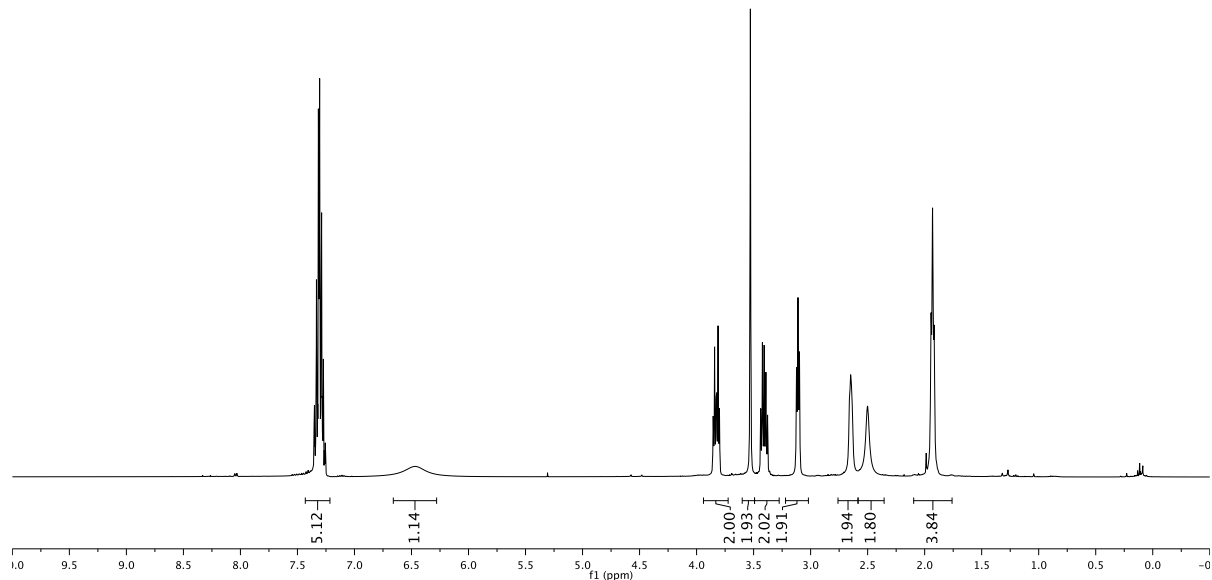

41-08-10-bhsieh.11.fid  
Sample fly-10-145-cyoxo-CC  
group bode

137.9  
128.8  
128.5  
127.4  
63.3  
62.6  
58.9  
52.7  
52.5  
39.9  
33.6

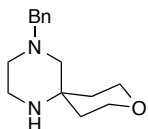

<sup>13</sup>C NMR (101 MHz, CDCl<sub>3</sub>) δ 137.9, 128.8, 128.5, 127.4, 63.3, 62.6, 58.9, 52.7, 52.5, 39.9, 33.6.

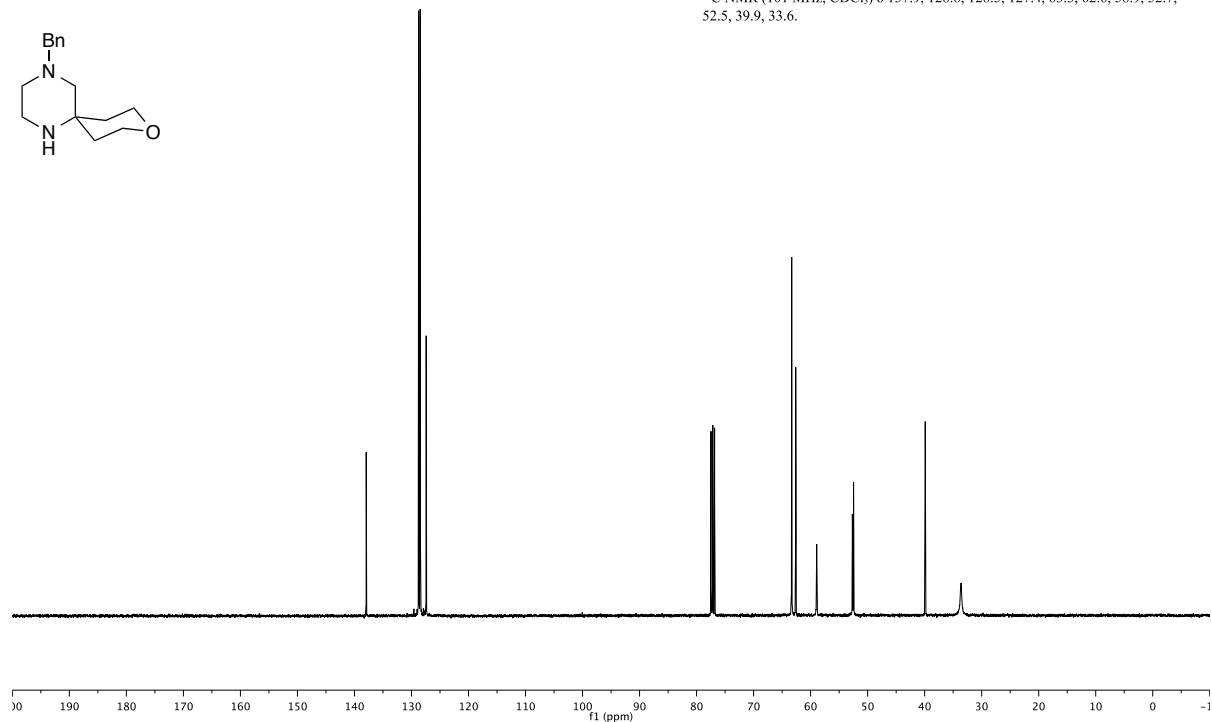

## 1-Benzyl-3-(pyridin-2-yl)piperazine (9h) (Scheme 2)

11-08-11-bhsieh.10.fid  
Sample fly-11-009  
group bode  
PRO CDCl<sub>3</sub> /opt/v bhsieh 11

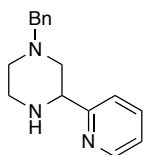

<sup>1</sup>H NMR (400 MHz, CDCl<sub>3</sub>) δ 8.52, 8.52, 8.51, 8.51, 8.51, 8.50, 7.62, 7.61, 7.60, 7.60, 7.58, 7.58, 7.34, 7.34, 7.32, 7.32, 7.32, 7.30, 7.30, 7.29, 7.28, 7.28, 7.27, 7.26, 7.26, 7.24, 7.24, 7.23, 7.22, 7.22, 7.21, 7.21, 7.20, 7.15, 7.15, 7.14, 7.13, 7.13, 7.13, 7.12, 7.12, 4.50, 4.11, 4.10, 4.08, 4.07, 3.54, 3.16, 3.15, 3.14, 3.13, 3.12, 3.11, 3.09, 3.08, 3.07, 3.07, 3.07, 3.06, 3.05, 3.05, 3.04, 3.04, 3.03, 3.03, 3.02, 2.84, 2.83, 2.83, 2.82, 2.81, 2.80, 2.80, 2.79, 2.28, 2.27, 2.25, 2.24, 2.22, 2.21, 2.20.

<sup>1</sup>H NMR (400 MHz, Chloroform-*d*) δ 8.51 (ddd, *J* = 4.9, 1.3, 1.2 Hz, 1 H), 7.60 (ddd, *J* = 7.7, 7.5, 1.8 Hz, 1 H), 7.34–7.20 (m, 6 H), 7.13 (ddd, *J* = 7.5, 4.9, 1.1 Hz, 1 H), 4.50 (br, 1 H), 4.09 (dd, *J* = 10.1, 3.0 Hz, 1 H), 3.54 (s, 2 H), 3.14 (ddd, *J* = 12.3, 2.9, 2.9 Hz, 1 H), 3.09–3.02 (m, 2 H), 2.84–2.79 (m, 1 H), 2.28–2.20 (m, 2 H).

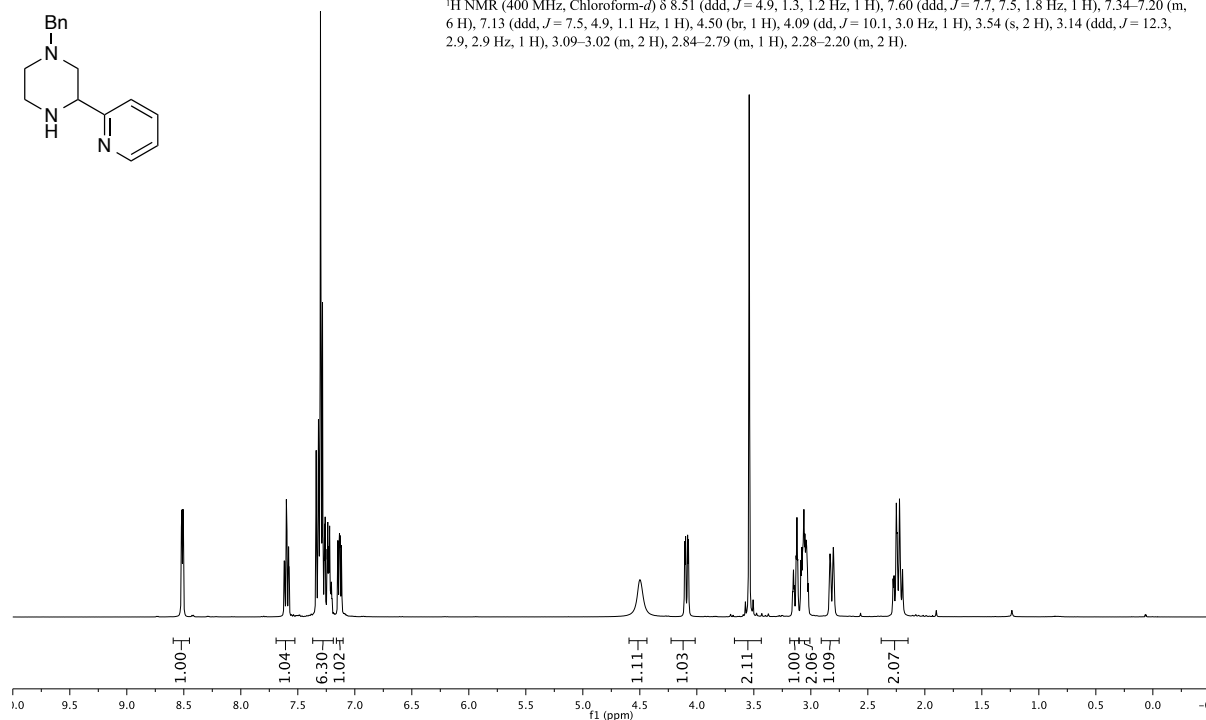

11-08-11-bhsieh.11.fid  
Sample fly-11-009  
group bode  
CAR CDCl<sub>3</sub> /opt/v bhsieh 11

159.6  
149.2  
137.7  
136.7  
129.2  
127.2  
127.2  
122.6  
121.7

63.2  
60.3  
58.8  
52.8  
45.2

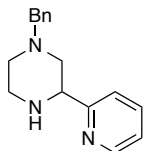

<sup>13</sup>C NMR (101 MHz, CDCl<sub>3</sub>) δ 159.6, 149.2, 137.7, 136.7, 129.2, 128.3, 127.2, 122.6, 121.7, 63.2, 60.3, 58.8, 52.8, 45.2.

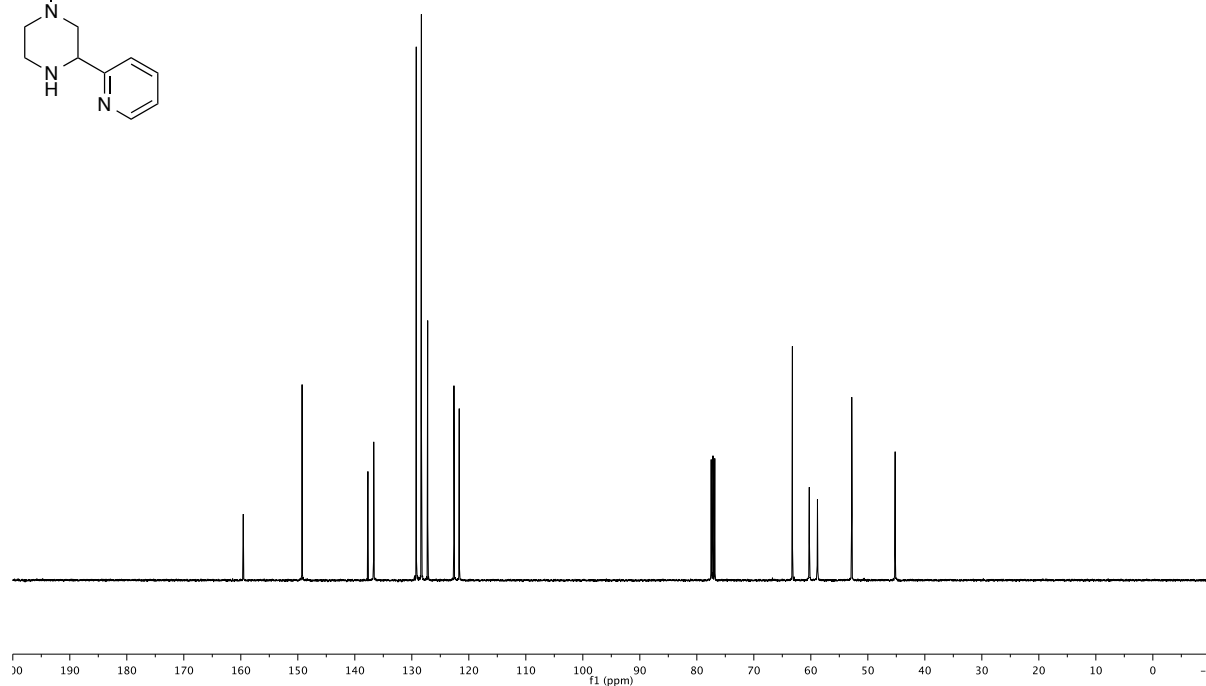

1-Benzyl-3-(1-benzyl-1*H*-imidazol-5-yl)piperazine (9i) (Scheme 2)

60-01-09-bhsieh.10.fid  
Sample fly-11-013-CC  
group bode  
PRO CDCl<sub>3</sub> /opt/v bhsieh 60

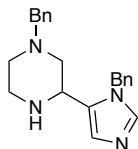

<sup>1</sup>H NMR (400 MHz, CDCl<sub>3</sub>) δ 7.45, 7.45, 7.35, 7.35, 7.34, 7.34, 7.33, 7.33, 7.32, 7.32, 7.31, 7.31, 7.31, 7.30, 7.29, 7.29, 7.28, 7.27, 7.27, 7.26, 7.26, 7.25, 7.24, 7.23, 7.23, 7.08, 7.08, 7.08, 7.07, 7.07, 7.06, 7.06, 7.06, 7.02, 7.01, 7.01, 5.32, 5.28, 5.17, 5.14, 3.82, 3.82, 3.81, 3.81, 3.79, 3.79, 3.78, 3.49, 2.96, 2.96, 2.95, 2.93, 2.92, 2.92, 2.88, 2.87, 2.86, 2.86, 2.85, 2.85, 2.84, 2.84, 2.83, 2.83, 2.83, 2.82, 2.82, 2.81, 2.74, 2.73, 2.73, 2.72, 2.71, 2.70, 2.70, 2.69, 2.31, 2.21, 2.18, 2.15, 2.11, 2.11, 2.09, 2.08, 2.06, 2.05.

<sup>1</sup>H NMR (400 MHz, Chloroform-*d*) δ 7.45 (d, *J* = 1.0 Hz, 1 H), 7.35–7.23 (m, 8 H), 7.08–7.06 (m, 2 H), 7.01 (apparent br, 1 H), 5.30 (d, *J* = 15.7 Hz, 1 H), 5.15 (d, *J* = 15.7 Hz, 1 H), 3.80 (ddd, *J* = 10.0, 2.8, 0.7 Hz, 1 H), 3.49 (s, 2 H), 2.94 (dt, *J* = 12.6, 3.0 Hz, 1 H), 2.88–2.81 (m, 2 H), 2.72 (apparent dq, *J* = 11.0, 2.5 Hz, 1 H), 2.31 (br, 1 H), 2.18 (dd, *J* = 10.0, 10.0 Hz, 1 H), 2.08 (apparent td, *J* = 11.0, 3.3 Hz, 1 H).

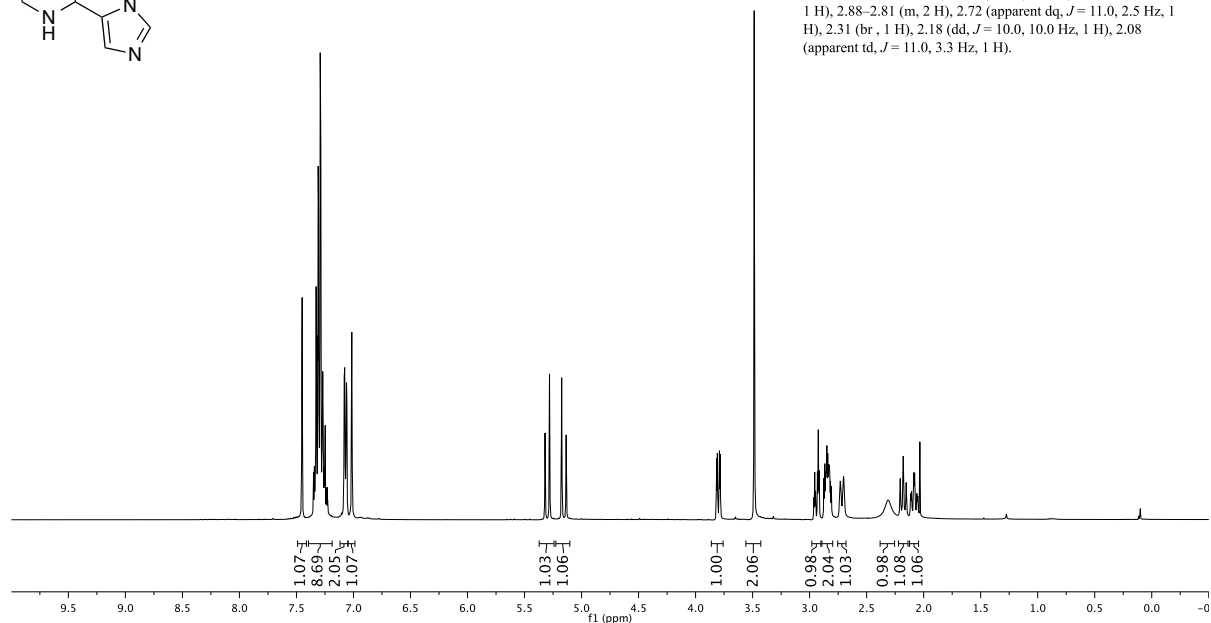

60-01-09-bhsieh.11.fid  
Sample fly-11-013-CC  
group bode  
CAR CDCl<sub>3</sub> /opt/v bhsieh 60

138.2  
137.6  
136.7  
129.2  
129.0  
128.3  
128.0  
127.1  
126.9  
126.8

61.3  
58.4  
53.7  
48.7  
45.5

<sup>13</sup>C NMR (101 MHz, CDCl<sub>3</sub>) δ 138.2, 137.6, 136.7, 132.2, 129.2, 129.0, 128.3, 128.0, 127.1, 126.9, 126.8, 63.3, 58.4, 53.7, 50.6, 48.7, 45.5.

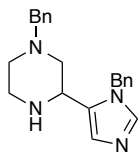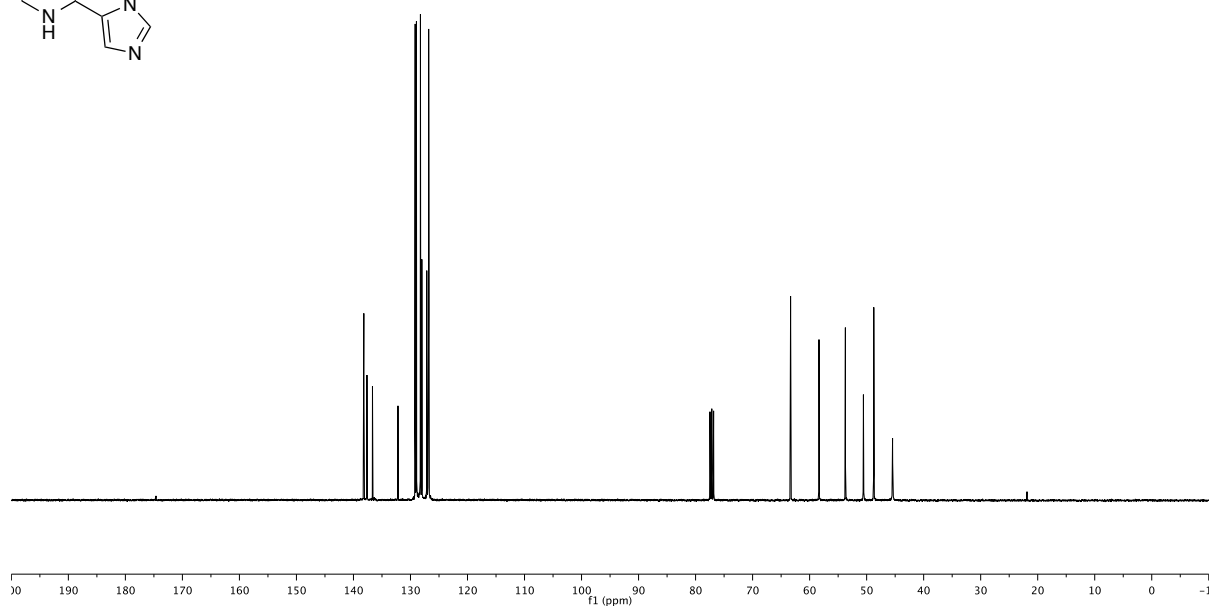

***N*-(4-((2*R*,6*S*)-4-Benzyl-6-methylpiperazin-2-yl)phenyl)acetamide (16a) (Scheme 3)**

44-08-10-bhsieh.10.fid  
Sample fly-11-039-CC  
group bode

<sup>1</sup>H NMR (400 MHz, CDCl<sub>3</sub>) δ 8.11, 7.46, 7.45, 7.45, 7.44, 7.43, 7.43, 7.35, 7.34, 7.33, 7.33, 7.31, 7.31, 7.30, 7.29, 7.29, 7.28, 7.28, 7.27, 7.27, 7.26, 7.25, 7.25, 3.96, 3.95, 3.93, 3.93, 3.59, 3.56, 3.54, 3.51, 3.14, 3.13, 3.12, 3.11, 3.10, 3.10, 3.10, 3.09, 3.08, 3.07, 3.06, 3.06, 2.90, 2.87, 2.84, 2.81, 2.62, 2.13, 2.07, 2.04, 2.01, 1.85, 1.82, 1.80, 1.11, 1.10.

<sup>1</sup>H NMR (400 MHz, Chloroform-*d*) δ 8.11 (s, 1 H), 7.46–7.43 (m, 2 H), 7.35–7.25 (m, 7 H), 3.94 (dd, *J* = 10.7, 2.8 Hz, 1 H), 3.58 (d, *J* = 13.1 Hz, 1 H), 3.53 (d, *J* = 13.1 Hz, 1 H), 3.10 (dq, *J* = 10.6, 6.3, 2.8 Hz, 1 H), 2.88 (d, *J* = 10.9 Hz, 1 H), 2.82 (d, *J* = 10.8 Hz, 1 H), 2.62 (br, 1 H), 2.13 (s, 3 H), 2.04 (dd, *J* = 10.9, 10.7 Hz, 1 H), 1.82 (t, *J* = 10.8, 10.6 Hz, 1 H), 1.10 (d, *J* = 6.3 Hz, 3 H).

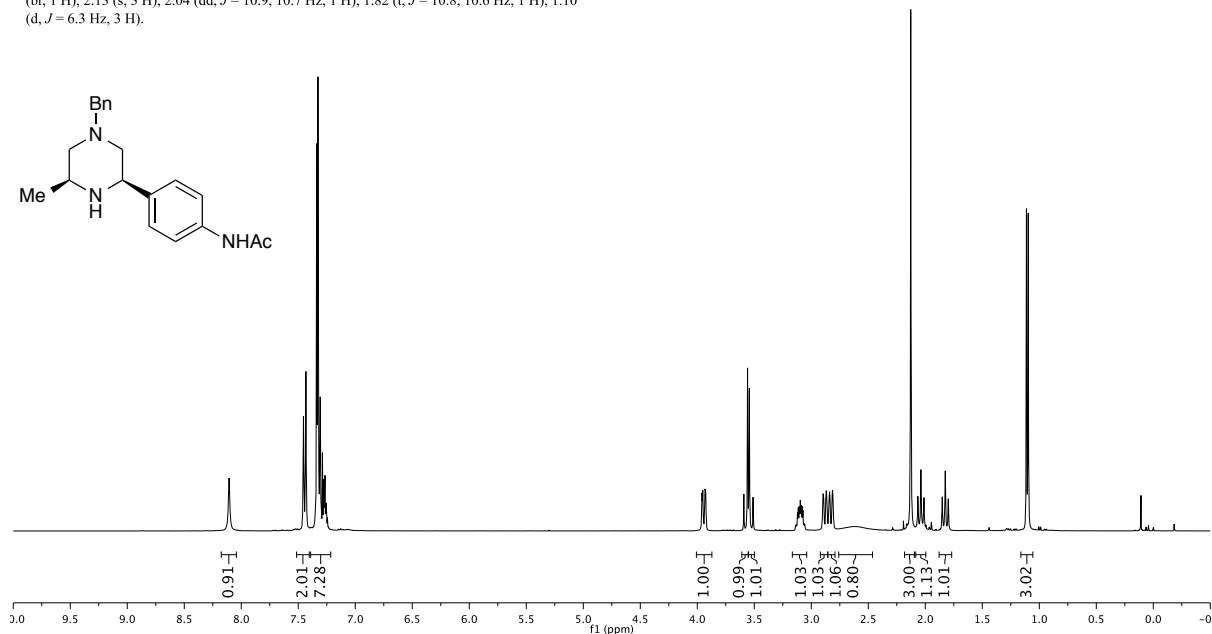

44-08-10-bhsieh.11.fid  
Sample fly-11-039-CC  
group bode

<sup>13</sup>C NMR (101 MHz, CDCl<sub>3</sub>) δ 168.9, 138.0, 137.9, 137.4, 129.3, 128.3, 127.7, 127.1, 120.2, 63.1, 60.4, 60.0, 60.0, 51.1, 24.4, 19.8.

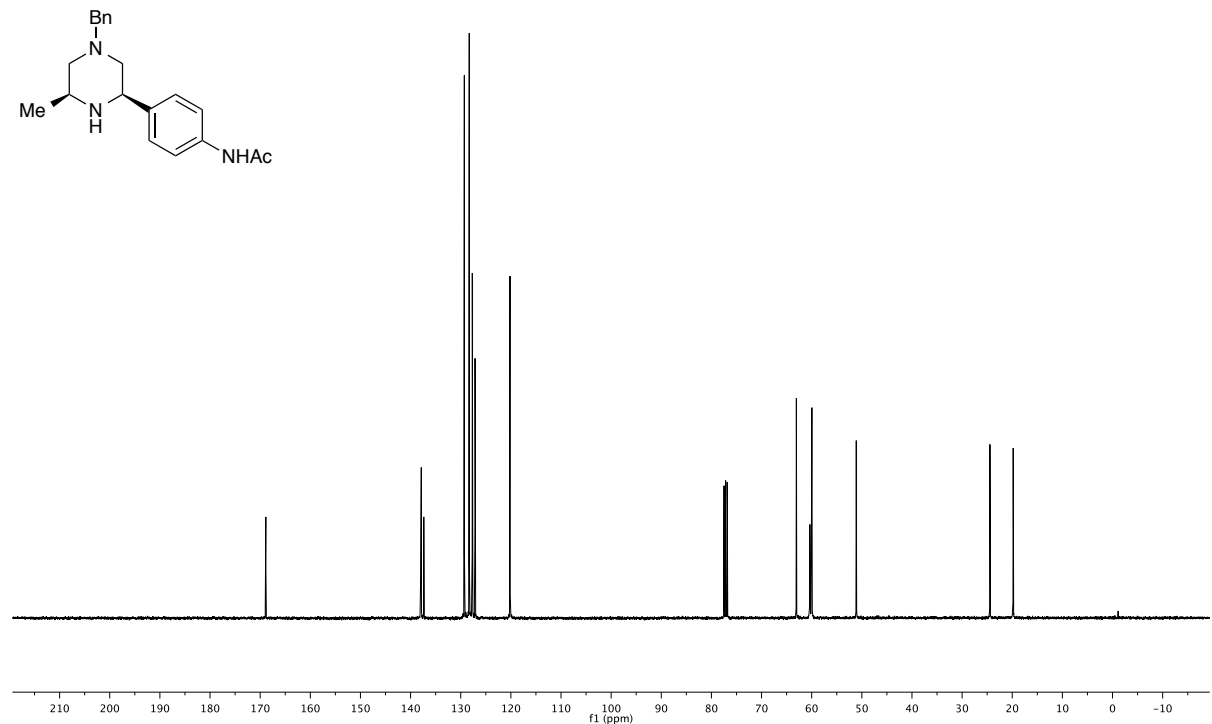

NOESY of *N*-(4-((2*R*,6*S*)-4-benzyl-6-methylpiperazin-2-yl)phenyl)acetamide (16a)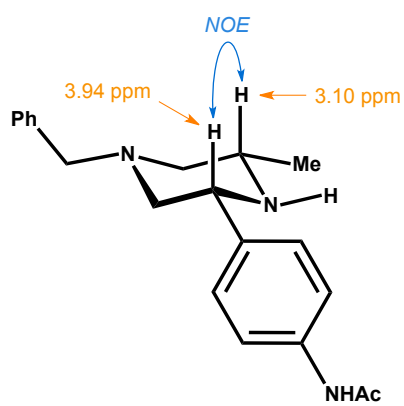

16a

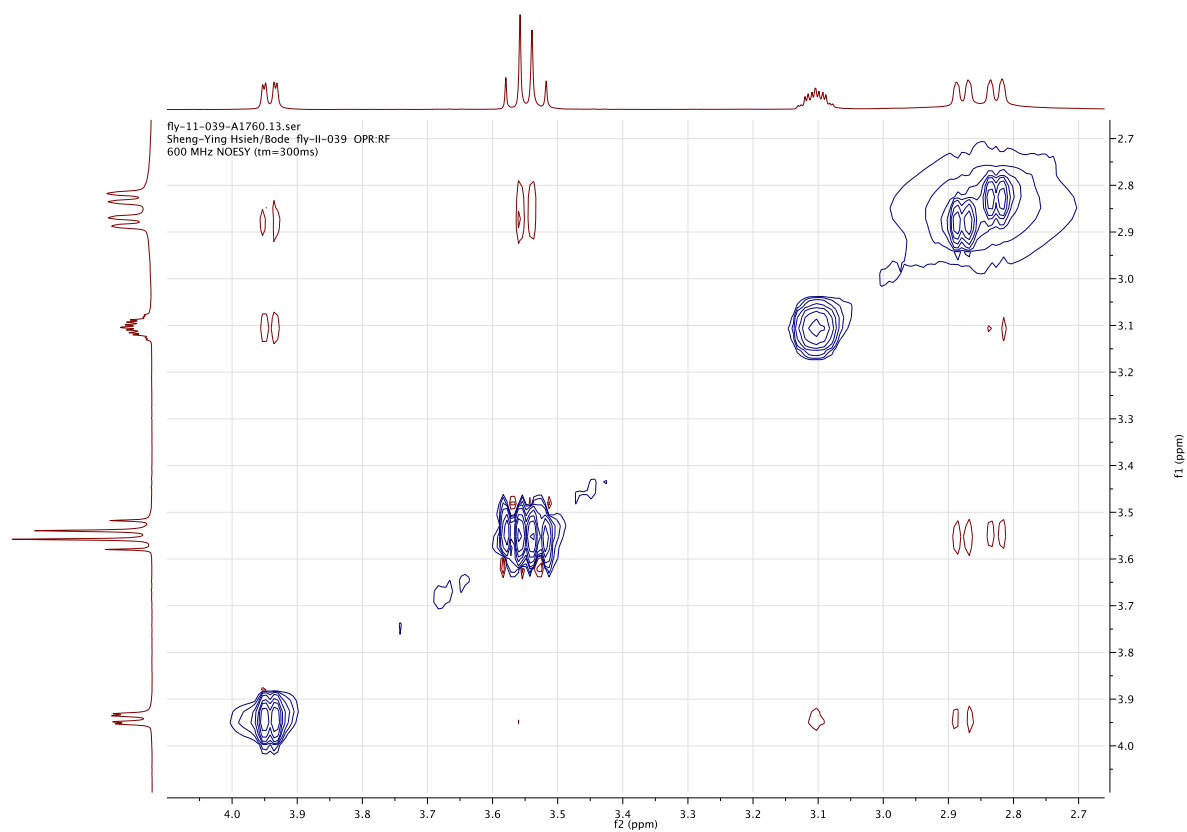

**(3*S*,5*S*)-1-Benzyl-3-(6-bromopyridin-2-yl)-5-methylpiperazine (16b) (Scheme 3)**

8-22-09-bhsieh.10.fid  
Sample fly-11-045-CC  
group bode  
PRO CDCl<sub>3</sub> /opt/v bhsieh 8

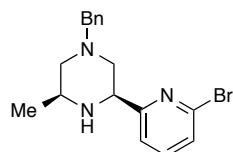

<sup>1</sup>H NMR (400 MHz, CDCl<sub>3</sub>) δ 7.50, 7.48, 7.46, 7.36, 7.36, 7.35, 7.34, 7.33, 7.33, 7.32, 7.32, 7.31, 7.31, 7.29, 7.29, 7.28, 7.27, 7.27, 7.26, 7.26, 7.25, 7.25, 7.24, 7.24, 4.09, 4.08, 4.07, 4.06, 3.60, 3.57, 3.55, 3.52, 3.12, 3.11, 3.10, 3.10, 3.09, 3.09, 3.08, 3.08, 3.08, 3.07, 3.07, 3.06, 3.06, 3.06, 3.05, 3.04, 2.85, 2.85, 2.83, 2.82, 2.20, 2.05, 2.02, 1.99, 1.77, 1.75, 1.72, 1.12, 1.10.

<sup>1</sup>H NMR (400 MHz, Chloroform-*d*) δ 7.48 (t, *J* = 7.7 Hz, 1 H), 7.36–7.24 (m, 7 H), 4.07 (dd, *J* = 10.5, 3.0 Hz, 1 H), 3.58 (d, *J* = 13.1 Hz, 1 H), 3.54 (d, *J* = 13.1 Hz, 1 H), 3.12–3.04 (m, 2 H), 2.84 (dd, *J* = 10.8, 2.9 Hz, 1 H), 2.20 (br, 1 H), 2.02 (t, *J* = 10.5 Hz, 1 H), 1.75 (t, *J* = 10.8 Hz, 1 H), 1.11 (d, *J* = 6.4 Hz, 3 H).

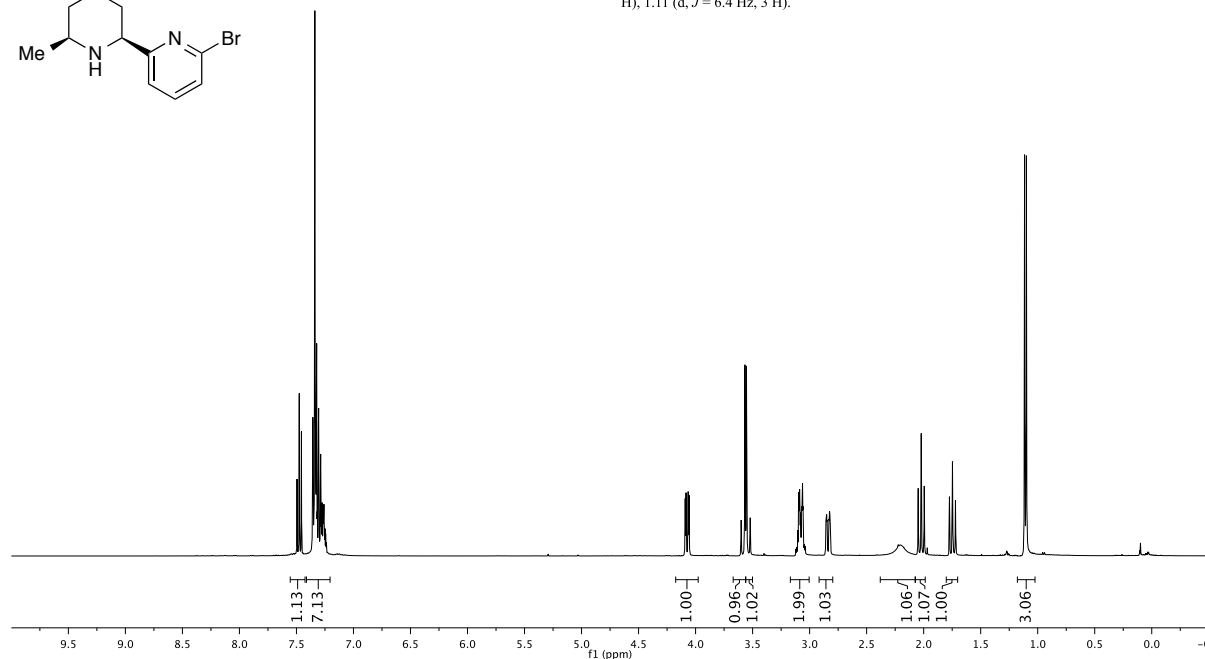

8-22-09-bhsieh.11.fid  
Sample fly-11-045-CC  
group bode  
CAR CDCl<sub>3</sub> /opt/v bhsieh 8

162.5

141.6  
138.0

128.5  
127.1  
126.8

120.2

63.1  
60.3  
58.7

50.5

19.9

<sup>13</sup>C NMR (101 MHz, CDCl<sub>3</sub>) δ 162.5, 141.6, 138.9, 138.0, 129.2, 128.3, 127.1, 126.8, 120.2, 63.1, 60.5, 60.3, 58.7, 50.5, 19.9.

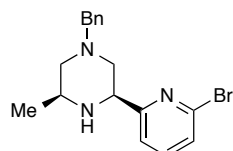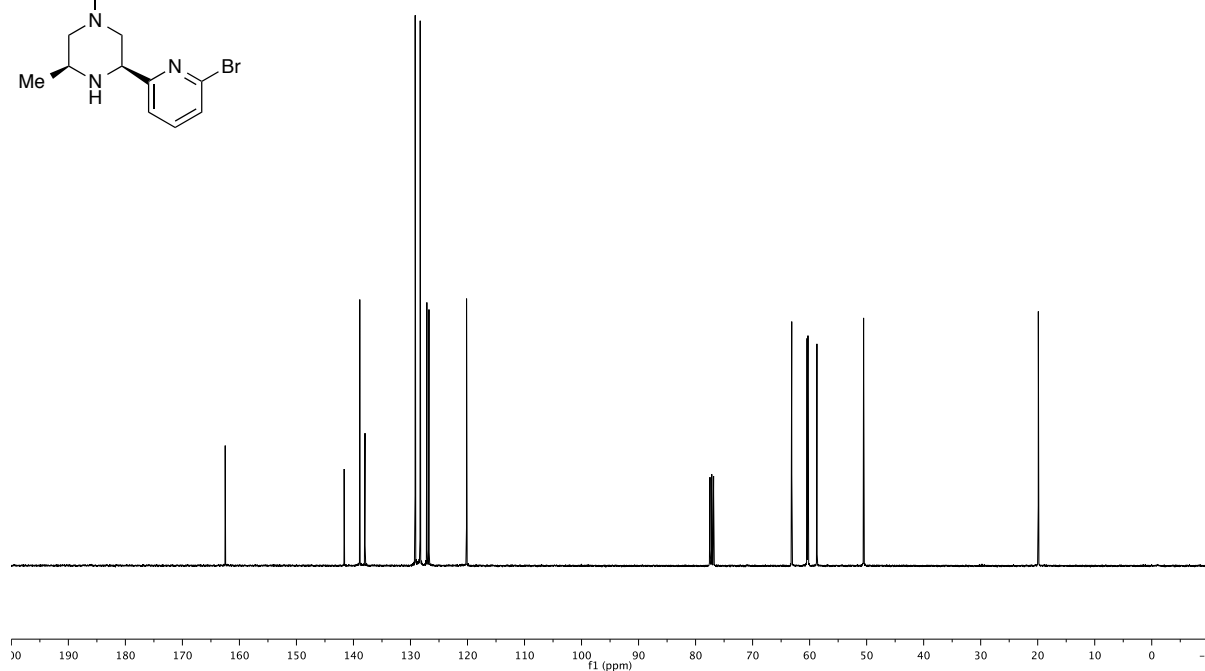

4-((2*S*,6*S*)-4-Benzyl-6-methylpiperazin-2-yl)oxazole (16c) (Scheme 3)

43-08-10-bhsieh.10.fid  
Sample fly-11-020-CC  
group bode

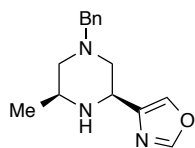

<sup>1</sup>H NMR (400 MHz, CDCl<sub>3</sub>) δ 7.82, 7.82, 7.56, 7.55, 7.55, 7.36, 7.35, 7.35, 7.34, 7.33, 7.32, 7.32, 7.32, 7.31, 7.30, 7.30, 7.29, 7.28, 7.27, 7.27, 7.27, 7.26, 7.26, 7.25, 7.25, 7.24, 7.24, 4.05, 4.05, 4.03, 4.02, 3.56, 3.12, 3.11, 3.10, 3.10, 3.10, 3.09, 3.09, 3.08, 3.08, 3.07, 3.07, 3.07, 3.06, 3.05, 3.04, 3.04, 2.85, 2.85, 2.83, 2.82, 2.20, 2.10, 2.08, 2.05, 1.80, 1.77, 1.77, 1.75, 1.09, 1.08.

<sup>1</sup>H NMR (400 MHz, Chloroform-*d*) δ 7.82 (d, *J* = 1.0 Hz, 1 H), 7.55 (t, *J* = 1.0 Hz, 1 H), 7.36–7.24 (m, 5 H), 4.04 (dd, *J* = 10.6, 3.0 Hz, 1 H), 3.56 (s, 2 H), 3.12–3.04 (m, 2 H), 2.84 (dd, *J* = 10.9, 2.9 Hz, 1 H), 2.20 (br, 1 H), 2.08 (dd, *J* = 10.6 Hz, 1 H), 1.77 (dd, *J* = 10.9, 10.1 Hz, 1 H), 1.08 (d, *J* = 6.4 Hz, 3 H).

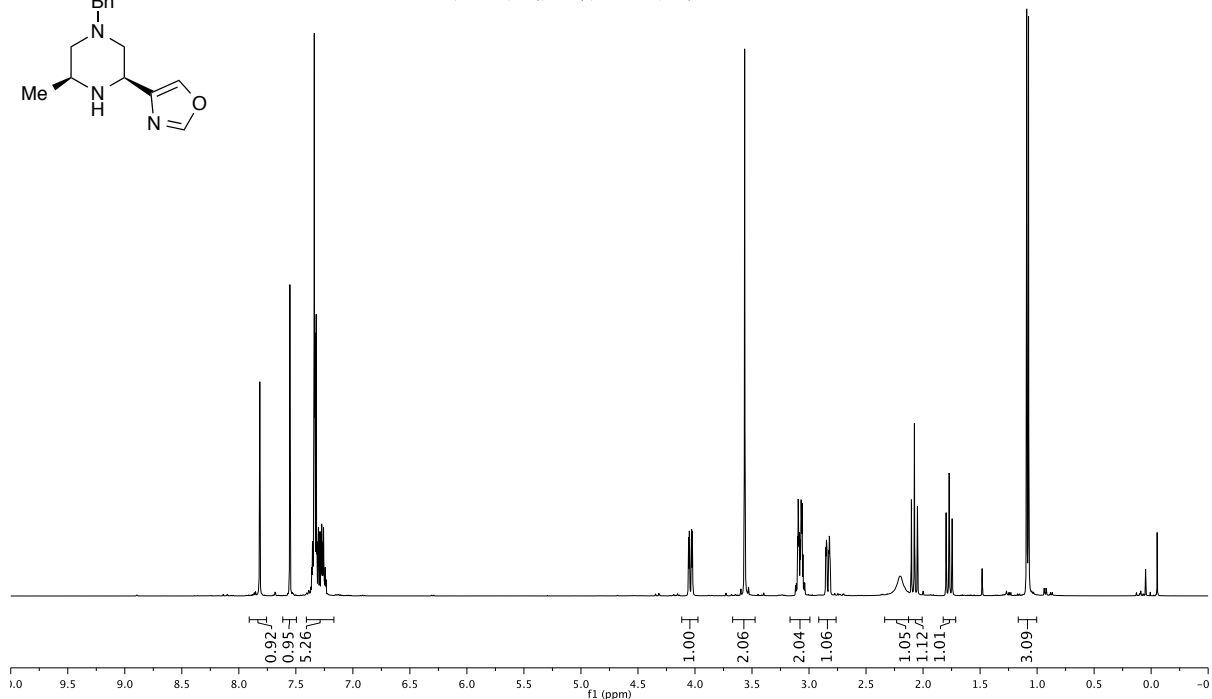

43-08-10-bhsieh.11.fid  
Sample fly-11-020-CC  
group bode

151.0, 141.2, 134.5, 129.2, 128.3, 127.2, 63.1, 60.5, 57.7, 52.5, 50.7, 19.8

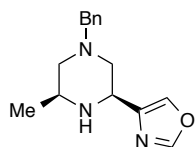

<sup>13</sup>C NMR (101 MHz, CDCl<sub>3</sub>) δ 151.0, 141.2, 137.9, 134.5, 129.2, 128.3, 127.2, 63.1, 60.5, 57.7, 52.5, 50.7, 19.8.

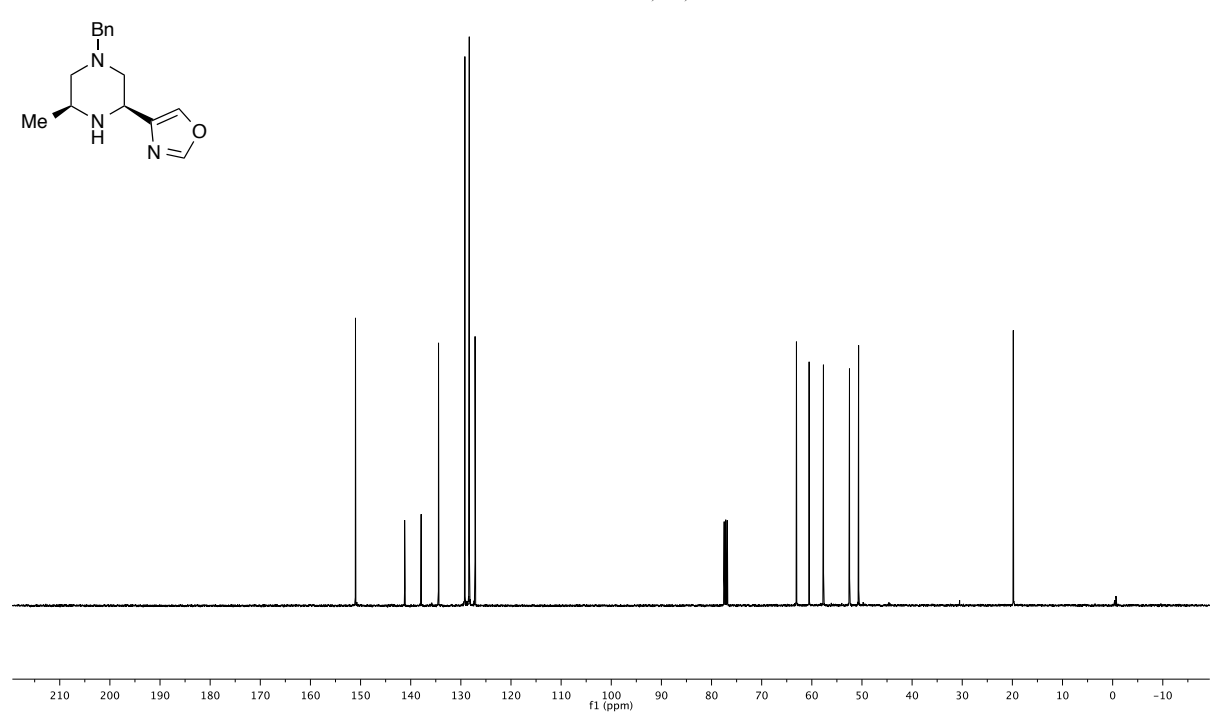

## 5-(4-Benzyl-1,4-diazaspiro[5.5]undecan-2-yl)-2-fluorobenzonitrile (17a) (Scheme 3)

56-10-10-bhsieh.10.fid  
Sample fly-11-046-CC  
group bode

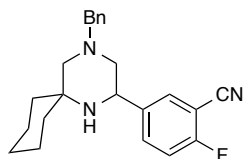

$^1\text{H}$  NMR (400 MHz,  $\text{CDCl}_3$ )  $\delta$  7.77, 7.77, 7.76, 7.75, 7.69, 7.69, 7.68, 7.68, 7.67, 7.67, 7.66, 7.65, 7.39, 7.38, 7.37, 7.36, 7.36, 7.35, 7.35, 7.34, 7.33, 7.33, 7.30, 7.30, 7.29, 7.29, 7.28, 7.28, 7.27, 7.27, 7.18, 7.16, 7.13, 4.24, 4.23, 4.21, 4.20, 3.59, 3.56, 3.47, 3.44, 2.89, 2.88, 2.86, 2.86, 2.80, 2.78, 1.93, 1.90, 1.89, 1.87, 1.82, 1.79, 1.51, 1.51, 1.50, 1.49, 1.46, 1.46, 1.46, 1.45, 1.44, 1.44, 1.43, 1.41, 1.40, 1.39, 1.38, 1.37.

$^1\text{H}$  NMR (400 MHz, Chloroform- $d$ )  $\delta$  7.76 (dd,  $J$  = 6.2, 2.3 Hz, 1 H), 7.67 (ddd,  $J$  = 8.8, 5.2, 2.3 Hz, 1 H), 7.39–7.33 (m, 4 H), 7.30–7.27 (m, 1 H), 7.16 (t,  $J$  = 8.7 Hz, 1 H), 4.22 (dd,  $J$  = 10.5, 3.2 Hz, 1 H), 3.57 (d,  $J$  = 13.4 Hz, 1 H), 3.45 (d,  $J$  = 13.4 Hz, 1 H), 2.87 (dd,  $J$  = 10.6, 3.2 Hz, 1 H), 2.79 (d,  $J$  = 11.0 Hz, 1 H), 1.90 (dd,  $J$  = 10.6, 10.5 Hz, 2 H), 1.89 (br, 1 H), 1.81 (d,  $J$  = 11.0 Hz, 1 H), 1.56 – 1.34 (m, 10 H).

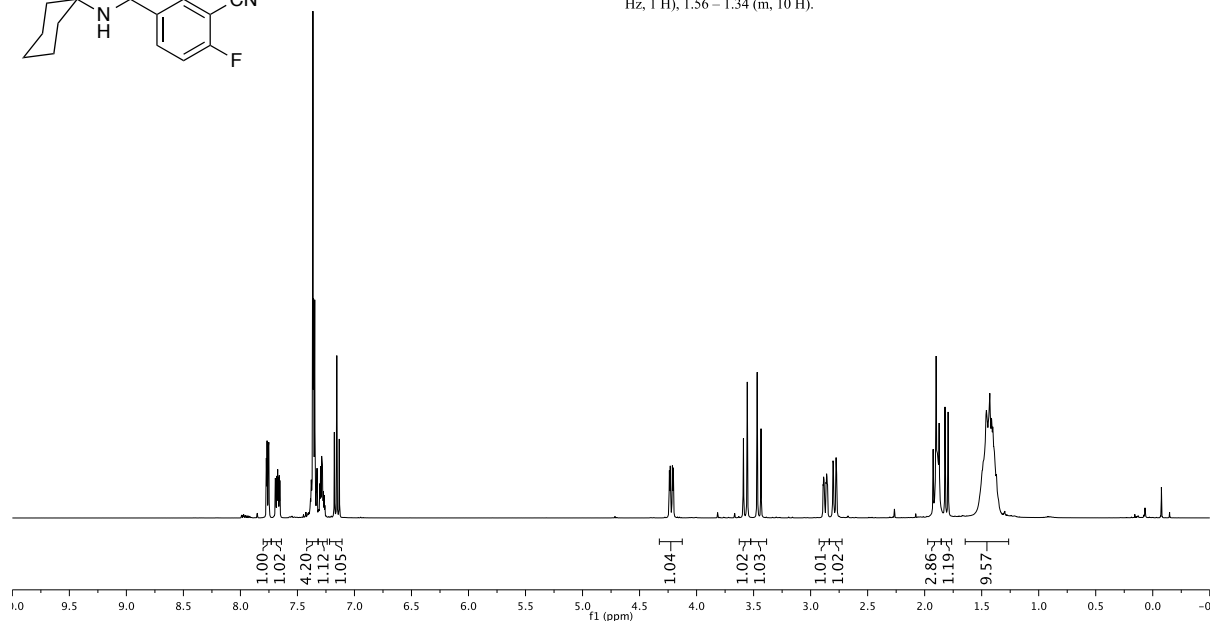

56-10-10-bhsieh.11.fid  
Sample fly-11-046-CC  
group bode

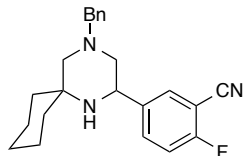

$^{13}\text{C}$  NMR (101 MHz,  $\text{CDCl}_3$ )  $\delta$  163.6, 161.0, 140.7, 140.6, 138.6, 134.2, 134.1, 132.2, 128.7, 128.3, 127.1, 116.2, 116.1, 114.2, 101.2, 101.1, 62.9, 62.1, 62.0, 53.3, 52.0, 38.8, 32.1, 26.4, 22.0, 21.8.

$^{13}\text{C}$  NMR (101 MHz, Chloroform- $d$ )  $\delta$  162.3 (d,  $J$  = 258.2 Hz), 140.6 (d,  $J$  = 3.5 Hz), 138.6, 134.1 (d,  $J$  = 8.2 Hz), 132.2, 128.7, 128.3, 127.1, 116.1 (d,  $J$  = 19.3 Hz), 114.2, 101.2 (d,  $J$  = 15.4 Hz), 62.9, 62.1, 62.0, 53.3, 52.0, 38.8, 32.1, 26.4, 22.0, 21.8.

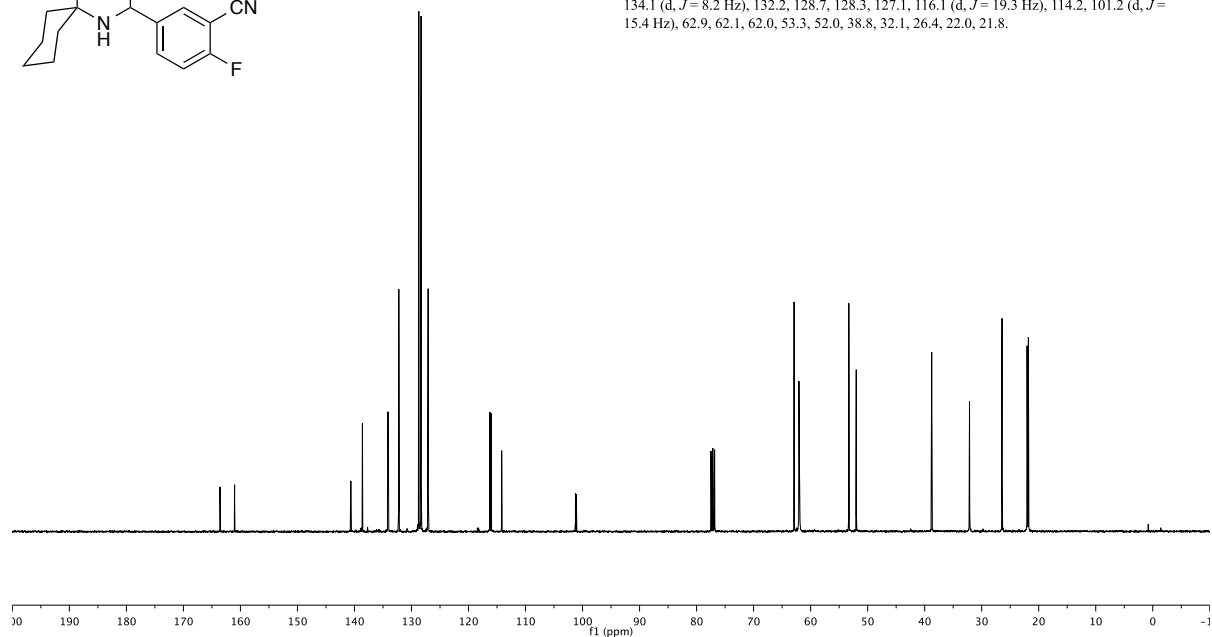



## 2-(4-Benzyl-1,4-diazaspiro[5.5]undecan-2-yl)thiazole (17b) (Scheme 3)

54-10-10-bhsieh.10.fid  
Sample fly-11-024-CC  
group bode

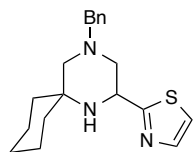

$^1\text{H}$  NMR (400 MHz,  $\text{CDCl}_3$ )  $\delta$  7.74, 7.73, 7.38, 7.38, 7.37, 7.36, 7.36, 7.35, 7.35, 7.35, 7.34, 7.34, 7.33, 7.33, 7.32, 7.32, 7.31, 7.29, 7.29, 7.28, 7.28, 7.27, 7.27, 7.26, 7.26, 7.25, 7.25, 7.25, 4.64, 4.63, 4.61, 4.60, 3.63, 3.60, 3.47, 3.44, 3.26, 3.25, 3.23, 3.22, 2.81, 2.78, 2.12, 2.09, 2.07, 1.89, 1.88, 1.86, 1.82, 1.79, 1.58, 1.58, 1.57, 1.57, 1.56, 1.56, 1.56, 1.55, 1.54, 1.53, 1.53, 1.52, 1.51, 1.51, 1.49, 1.49, 1.48, 1.47, 1.47, 1.46, 1.46, 1.45, 1.45, 1.43, 1.42, 1.41, 1.41, 1.40, 1.39, 1.39, 1.37, 1.37, 1.36, 1.35, 1.35, 1.34, 1.33, 1.32.

$^1\text{H}$  NMR (400 MHz, Chloroform- $d$ )  $\delta$  7.73 (d,  $J = 3.3$  Hz, 1 H), 7.38–7.31 (m, 4 H), 7.29–7.25 (m, 1 H), 7.26 (d,  $J = 3.3$  Hz, 1 H), 4.62 (dd,  $J = 10.5$ , 3.4 Hz, 1 H), 3.62 (d,  $J = 13.4$  Hz, 1 H), 3.46 (d,  $J = 13.4$  Hz, 1 H), 3.24 (dd,  $J = 10.6$ , 3.4 Hz, 1 H), 2.80 (d,  $J = 11.0$  Hz, 1 H), 2.09 (dd,  $J = 10.6$ , 10.5 Hz, 1H), 1.88 (apparent t,  $J = 6.0$  Hz, 2 H), 1.81 (d,  $J = 11.0$  Hz, 1 H), 1.58–1.48 (m, 2 H), 1.47–1.32 (m, 7 H).

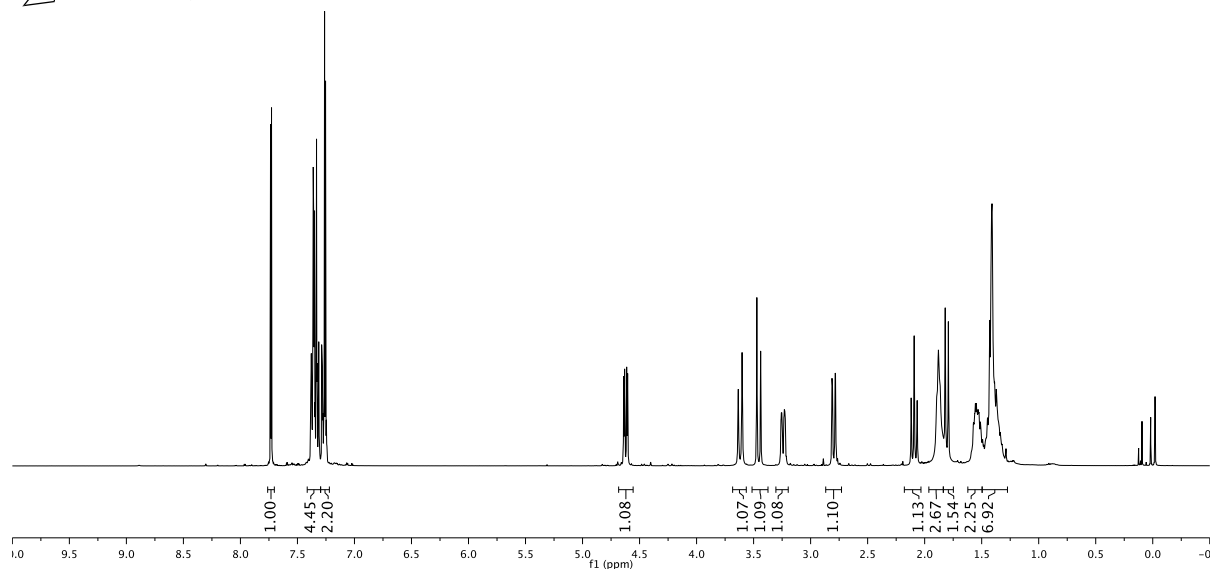

54-10-10-bhsieh.11.fid  
Sample fly-11-024-CC  
group bode

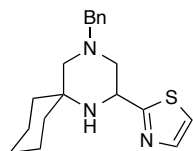

$^{13}\text{C}$  NMR (101 MHz,  $\text{CDCl}_3$ )  $\delta$  173.5, 142.3, 138.7, 128.8, 128.3, 127.1, 118.6, 62.9, 62.0, 60.9, 52.9, 52.3, 38.6, 32.2, 26.5, 22.0, 21.8.

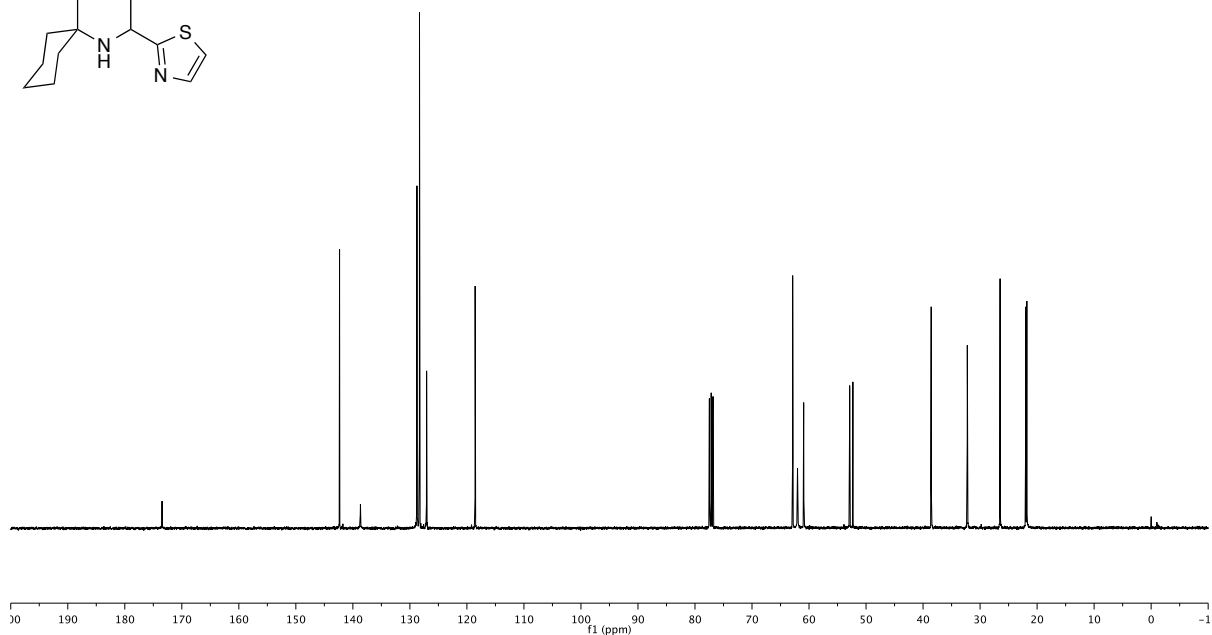

## 5-(4-Benzyl-1,4-diazaspiro[5.5]undecan-2-yl)-3-phenylisoxazole (17c) (Scheme 3)

38-05-11-bhsieh.10.fid  
Sample fly-11-087-CC  
group bode  
PRO CDCl<sub>3</sub> /opt/v bhsieh 38

<sup>1</sup>H NMR (400 MHz, CDCl<sub>3</sub>) δ 7.80, 7.80, 7.79, 7.79, 7.79, 7.78, 7.78, 7.78, 7.45, 7.45, 7.45, 7.44, 7.44, 7.43, 7.43, 7.42, 7.42, 7.37, 7.36, 7.35, 7.35, 7.35, 7.35, 7.34, 7.33, 7.33, 7.32, 7.32, 7.31, 7.29, 7.28, 7.28, 7.27, 7.27, 7.26, 7.26, 7.25, 6.48, 4.49, 4.48, 4.46, 4.45, 3.62, 3.59, 3.48, 3.45, 3.17, 3.16, 3.14, 3.13, 2.81, 2.80, 2.78, 2.78, 2.18, 2.15, 2.13, 1.90, 1.88, 1.86, 1.84, 1.84, 1.82, 1.79, 1.56, 1.55, 1.55, 1.54, 1.53, 1.52, 1.51, 1.50, 1.49, 1.45, 1.44, 1.43, 1.42, 1.41, 1.40, 1.39, 1.39, 1.38, 1.37, 1.35, 1.33.

<sup>1</sup>H NMR (400 MHz, Chloroform-*d*) δ 7.80–7.78 (m, 2 H), 7.45–7.42 (m, 3 H), 7.37–7.31 (m, 4 H), 7.29–7.25 (m, 1 H), 6.48 (s, 1 H), 4.47 (dd, *J* = 10.6, 2.6 Hz, 1 H), 3.60 (d, *J* = 13.3 Hz, 1 H), 3.46 (d, *J* = 13.3 Hz, 1 H), 3.15 (dd, *J* = 10.5, 2.6 Hz, 1 H), 2.79 (d, *J* = 11.1 Hz, 1 H), 2.15 (dd, *J* = 10.6, 10.5 Hz, 1 H), 1.90–1.81 (m, 2 H), 1.81 (d, *J* = 11.1 Hz, 1 H), 1.56–1.49 (m, 2 H), 1.45–1.33 (m, 7 H).

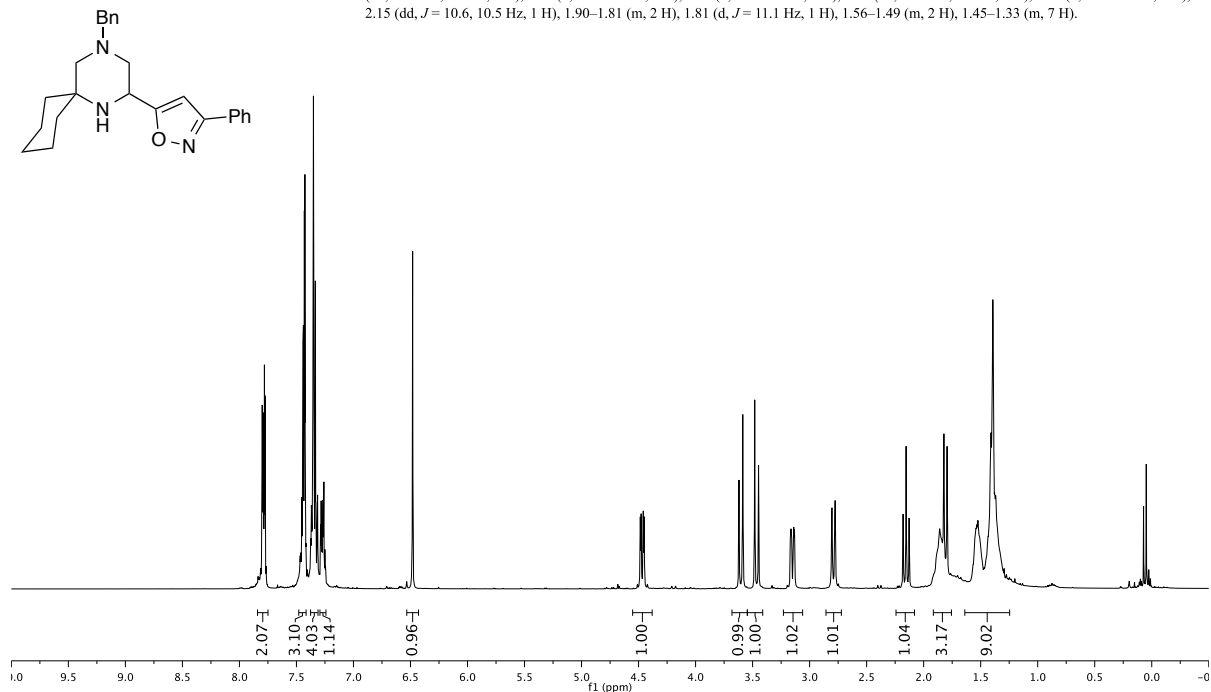

38-05-11-bhsieh.11.fid  
Sample fly-11-087-CC  
group bode  
CAR CDCl<sub>3</sub> /opt/v bhsieh 38

— 162.3

— 138.5

— 130.0

— 129.2

— 128.9

— 128.8

— 128.4

— 127.2

— 98.7

— 62.9

— 62.0

— 58.5

— 52.1

— 47.9

— 38.5

— 32.0

— 26.4

— 21.9

— 21.8

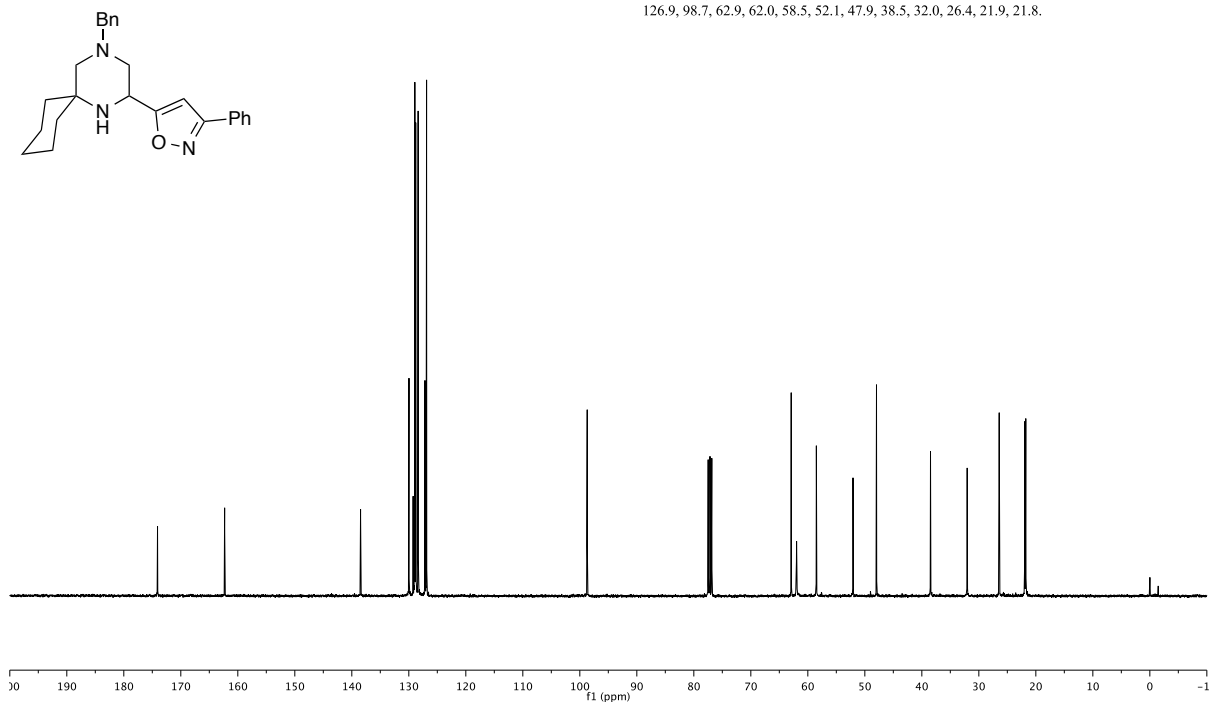

<sup>13</sup>C NMR (101 MHz, CDCl<sub>3</sub>) δ 174.1, 162.3, 138.5, 130.0, 129.2, 128.9, 128.8, 128.4, 127.2, 126.9, 98.7, 62.9, 62.0, 58.5, 52.1, 47.9, 38.5, 32.0, 26.4, 21.9, 21.8.

**(*trans,cis*)-1-Benzyl-3-(3-bromophenyl)octahydrofuro[3,4-*b*]pyrazine (18a) (Scheme 3)**

53-10-10-bhsieh.10.fid  
Sample fly-11-022-CC  
group bode

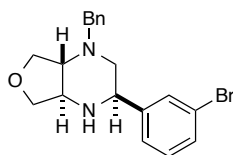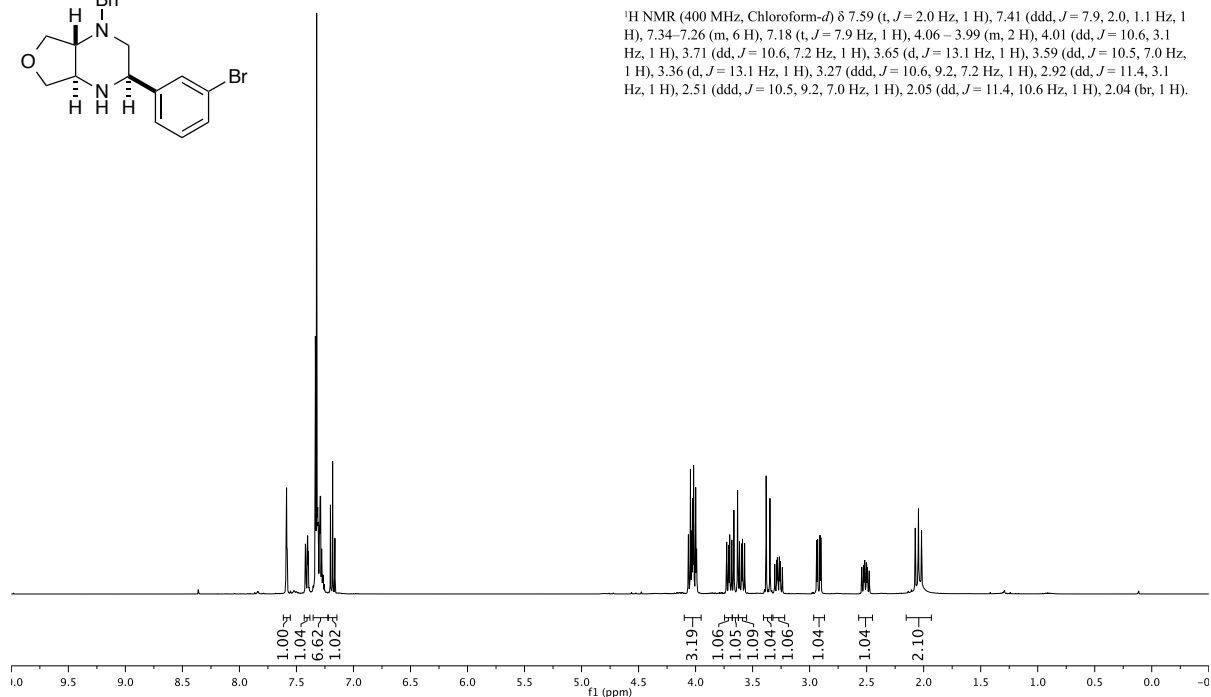

53-10-10-bhsieh.11.fid  
Sample fly-11-022-CC  
group bode

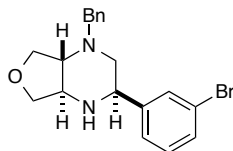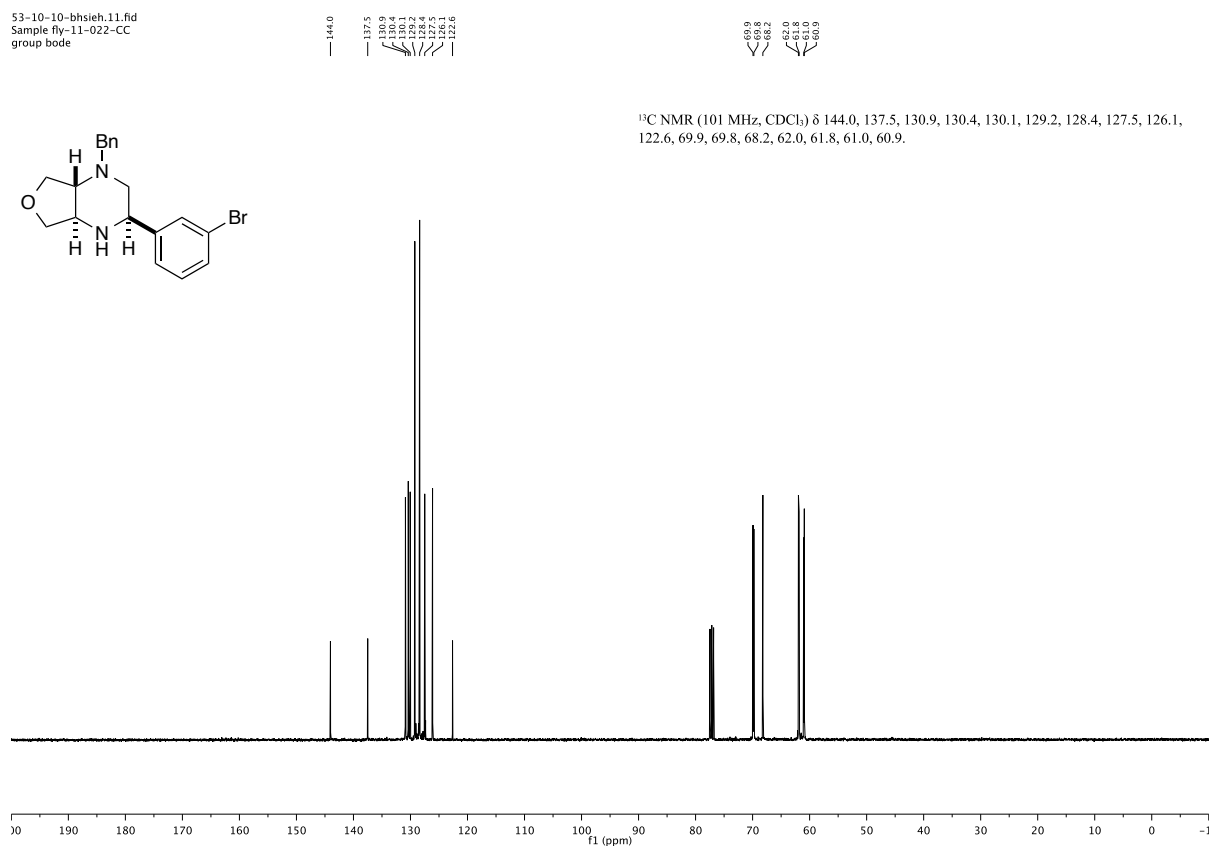

53-23-09-bhsieh.10.fid  
Sample fly-11-048-CC  
group bode  
PRO CDCI3 /opt/v bhsieh 53

<sup>1</sup>H NMR (400 MHz, Chloroform-*d*) δ 7.33–7.23 (m, 5 H), 5.96 (d, *J* = 1.0 Hz, 1 H), 4.19 (dd, *J* = 11.0, 3.2 Hz, 1 H), 4.02 (dd, *J* = 7.3, 7.3 Hz, 1 H), 3.99 (dd, *J* = 7.5, 6.7 Hz, 1 H), 3.64 (d, *J* = 13.2 Hz, 1 H), 3.62 (dd, *J* = 10.7, 7.3 Hz, 1 H), 3.55 (dd, *J* = 10.5, 7.5 Hz, 1 H), 3.35 (d, *J* = 13.2 Hz, 1 H), 3.23 (dd, *J* = 10.7, 9.1, 7.3 Hz, 1 H), 3.05 (dd, *J* = 11.2, 3.2 Hz, 1 H), 2.43 (ddd, *J* = 10.5, 9.1, 6.7 Hz, 1H), 2.37 (d, *J* = 1.0 Hz, 3 H), 2.13 (dd, *J* = 11.2, 11.0 Hz, 1 H), 2.06 (br, 1 H).

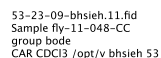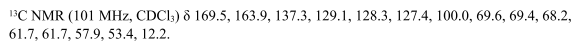

NOESY of (*trans,cis*)-1-benzyl-3-(5-methylisoxazol-3-yl)octahydrofuro[3,4-*b*]pyrazine (18b)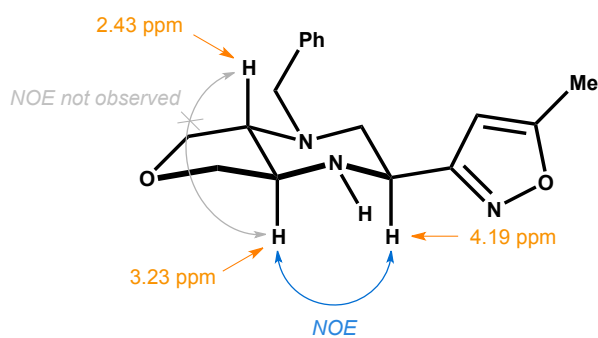

18b

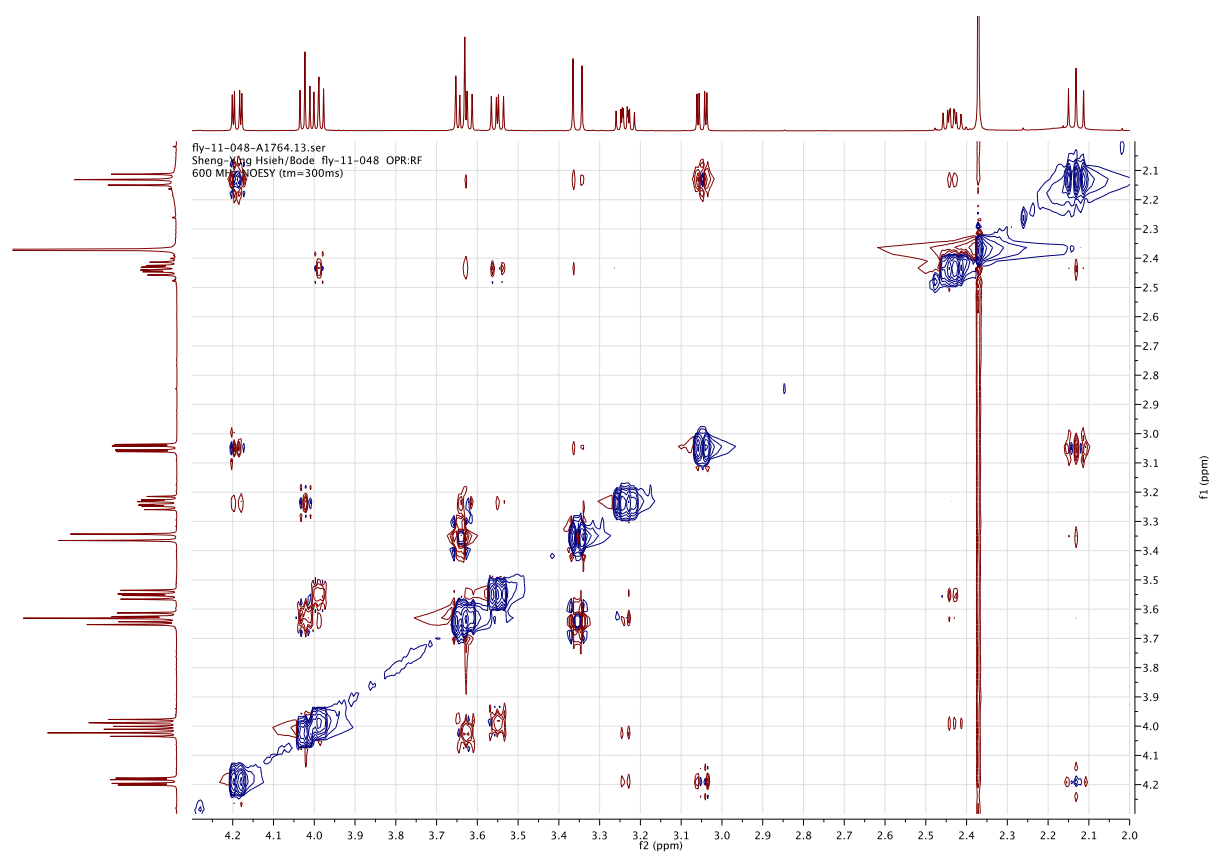

**(*trans*)-4'-Benzylhexahydro-1'*H*-spiro[cyclohexane-1,2'-furo[3,4-*b*]pyrazin]-4-one ethylene ketal (18c)**  
**(Scheme 3)**

16-11-10-bhsieh.10.fid  
 Sample fly-11-067-CC  
 group bode  
 PRO CDCl<sub>3</sub> /opt/v bhsieh 16

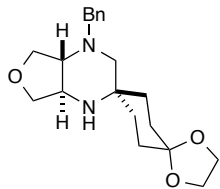

<sup>1</sup>H NMR (400 MHz, CDCl<sub>3</sub>) δ 7.32, 7.31, 7.30, 7.29, 7.28, 7.27, 7.27, 7.26, 7.26, 7.25, 7.25, 7.24, 7.23, 7.23, 7.22, 7.22, 7.21, 7.21, 3.98, 3.97, 3.96, 3.96, 3.94, 3.94, 3.93, 3.92, 3.91, 3.91, 3.90, 3.90, 3.90, 3.89, 3.88, 3.88, 3.87, 3.87, 3.86, 3.85, 3.61, 3.57, 3.55, 3.53, 3.53, 3.53, 3.52, 3.51, 3.50, 3.50, 3.48, 3.34, 3.32, 3.32, 3.31, 3.30, 3.30, 3.29, 3.27, 3.21, 3.18, 2.74, 2.71, 2.25, 2.23, 2.22, 2.22, 2.21, 2.21, 2.20, 2.19, 2.18, 2.12, 2.11, 2.11, 2.10, 2.09, 2.08, 2.08, 2.07, 2.06, 1.80, 1.79, 1.78, 1.77, 1.76, 1.76, 1.75, 1.74, 1.74, 1.73, 1.73, 1.72, 1.71, 1.70, 1.70, 1.69, 1.68, 1.68, 1.67, 1.67, 1.58, 1.58, 1.56, 1.55, 1.55, 1.53, 1.52, 1.52, 1.51, 1.51, 1.50, 1.50, 1.49, 1.48, 1.47, 1.47, 1.46, 1.46, 1.45, 1.45, 1.44, 1.44, 1.43, 1.43, 1.42, 1.42, 1.41, 1.41.

<sup>1</sup>H NMR (400 MHz, Chloroform-*d*) δ 7.32–7.21 (m, 5 H), 3.96 (dd, *J* = 7.1, 7.1 Hz, 1 H), 3.96 (dd, *J* = 7.0, 7.0 Hz, 1 H), 3.92–3.85 (m, 4 H), 3.59 (d, *J* = 13.3 Hz, 1 H), 3.55–3.48 (m, 2 H), 3.31 (ddd, *J* = 10.7, 9.4, 7.1 Hz, 1 H), 3.19 (d, *J* = 13.3 Hz, 1 H), 2.72 (d, *J* = 11.5 Hz, 1 H), 2.22 (ddd, *J* = 10.5, 9.4, 7.0 Hz, 1H), 2.12–2.06 (m, 1 H), 1.80–1.67 (m, 3 H), 1.71 (d, *J* = 11.5 Hz, 1 H), 1.58–1.41 (m, 5 H).

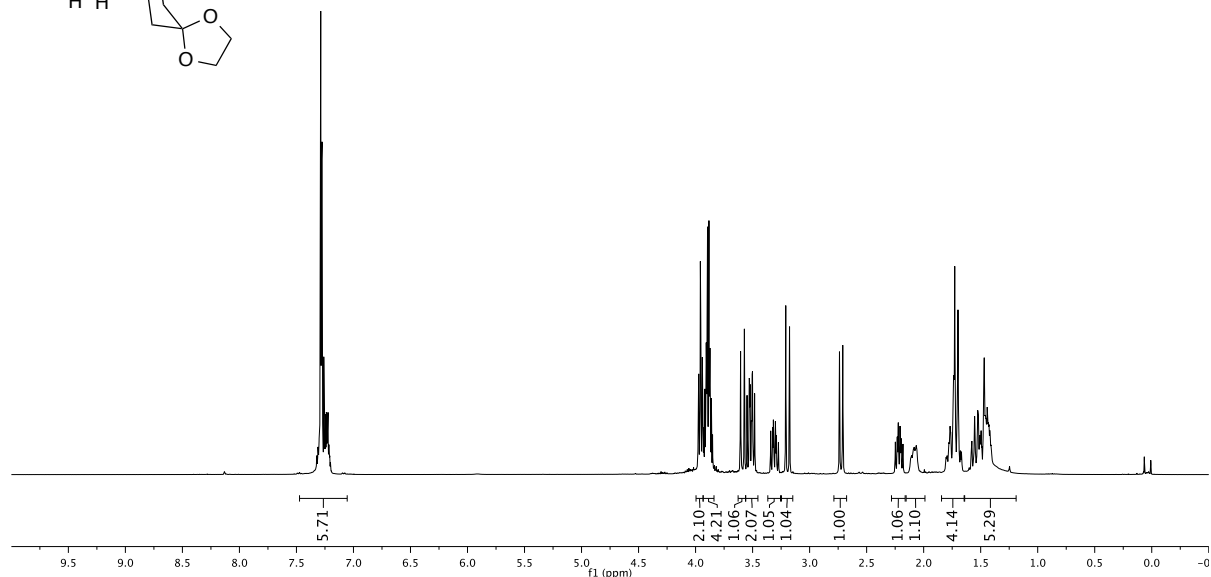

16-11-10-bhsieh.11.fid  
 Sample fly-11-067-CC  
 group bode  
 CAR CDCl<sub>3</sub> /opt/v bhsieh 16

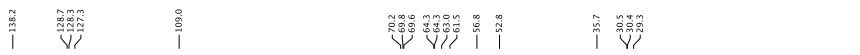

<sup>13</sup>C NMR (101 MHz, CDCl<sub>3</sub>) δ 138.2, 128.7, 128.3, 127.3, 109.0, 70.2, 69.8, 69.6, 64.3, 64.3, 63.0, 61.5, 56.8, 52.8, 35.7, 30.5, 30.4, 29.3.

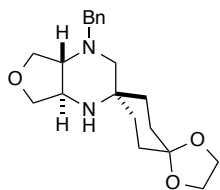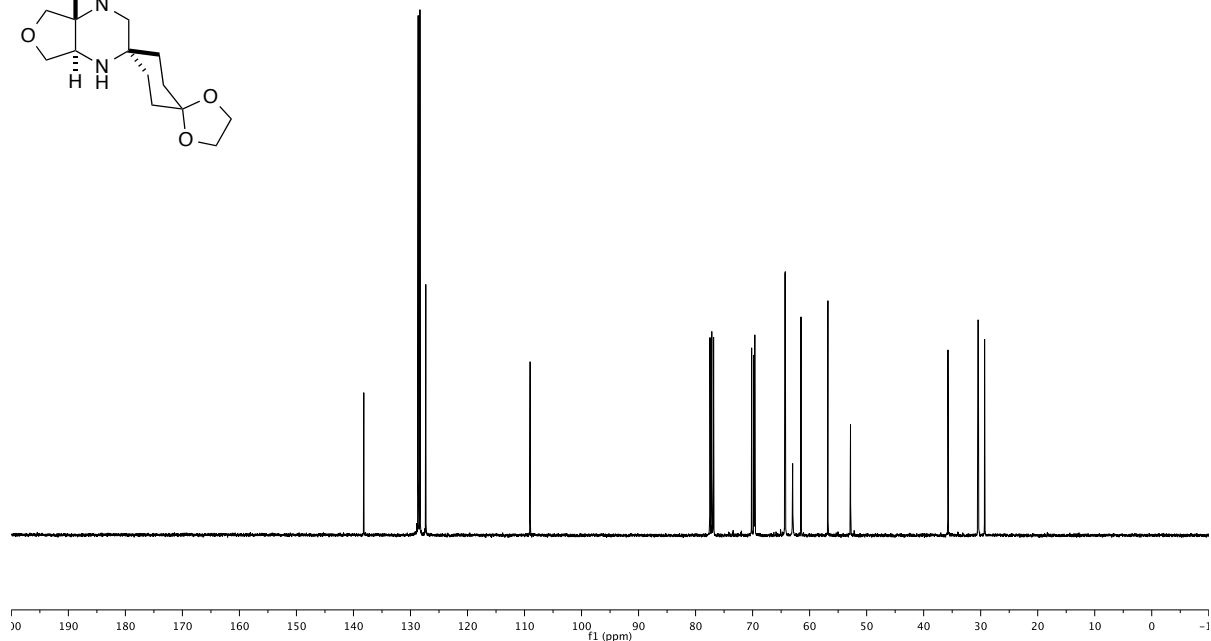

**(*trans,cis*)-3-(Benzo[*d*][1,3]dioxol-5-yl)-1-benzyldecahydroquinoxaline (19a) (Scheme 3)**

14-11-10-bhsieh.10.fid  
Sample fly-11-028-CC  
group bode  
PRO CDCl<sub>3</sub> /opt/v bhsieh 14

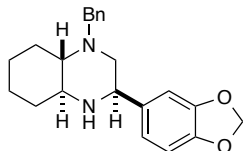

<sup>1</sup>H NMR (400 MHz, CDCl<sub>3</sub>) δ 7.34, 7.33, 7.32, 7.31, 7.29, 7.29, 7.29, 7.27, 7.26, 7.25, 7.25, 7.24, 7.24, 7.23, 7.23, 7.22, 6.89, 6.89, 6.82, 6.81, 6.80, 6.79, 6.73, 6.71, 5.91, 4.16, 4.13, 3.89, 3.89, 3.87, 3.86, 3.26, 3.23, 2.85, 2.84, 2.82, 2.82, 2.70, 2.69, 2.68, 2.67, 2.67, 2.66, 2.65, 2.64, 2.33, 2.32, 2.31, 2.30, 2.30, 2.29, 2.14, 2.12, 2.09, 2.02, 2.01, 2.00, 1.99, 1.99, 1.98, 1.97, 1.96, 1.88, 1.88, 1.87, 1.86, 1.85, 1.84, 1.78, 1.78, 1.77, 1.77, 1.76, 1.75, 1.75, 1.74, 1.74, 1.73, 1.72, 1.71, 1.49, 1.48, 1.46, 1.46, 1.45, 1.43, 1.41, 1.40, 1.40, 1.39, 1.38, 1.38, 1.37, 1.36, 1.35, 1.34, 1.33, 1.30, 1.29, 1.28, 1.27, 1.26, 1.26, 1.25, 1.24, 1.23, 1.23, 1.22, 1.20, 1.19.

<sup>1</sup>H NMR (400 MHz, Chloroform-*d*) δ 7.31 (d, *J* = 4.4 Hz, 4 H), 7.29–7.21 (m, 1 H), 6.89 (d, *J* = 1.6 Hz, 1 H), 6.80 (dd, *J* = 8.0, 1.6 Hz, 1 H), 6.72 (d, *J* = 8.0 Hz, 1 H), 5.91 (s, 2 H), 4.15 (d, *J* = 13.6 Hz, 1 H), 3.88 (dd, *J* = 10.9, 2.8 Hz, 1 H), 3.25 (d, *J* = 13.6 Hz, 1 H), 2.83 (dd, *J* = 10.9, 2.8 Hz, 1 H), 2.67 (ddd, *J* = 10.6, 8.7, 3.9 Hz, 1 H), 2.33–2.29 (m, 1 H), 2.12 (dd, *J* = 10.9, 10.9 Hz, 1 H), 1.99 (ddd, *J* = 10.6, 8.6, 3.6 Hz, 1H), 1.88–1.84 (m, 1 H), 1.78–1.71 (m, 3 H), 1.49–1.33 (m, 3 H), 1.30–1.19 (m, 1 H).

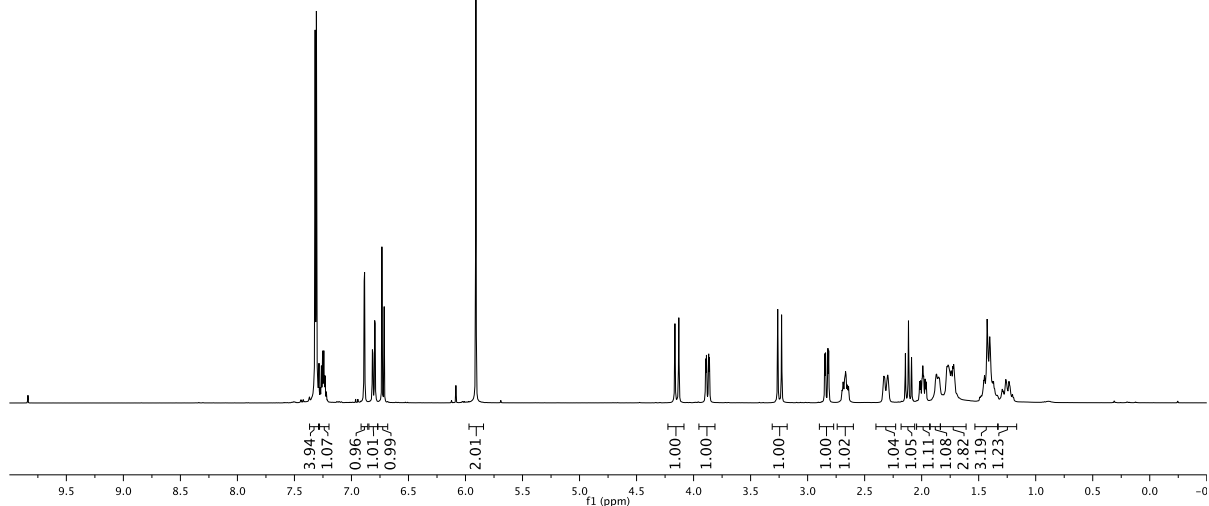

14-11-10-bhsieh.11.fid  
Sample fly-11-028-CC  
group bode  
CAR CDCl<sub>3</sub> /opt/v bhsieh 14

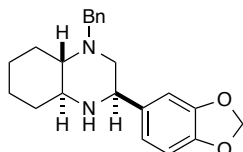

<sup>13</sup>C NMR (101 MHz, CDCl<sub>3</sub>) δ 147.5, 146.7, 138.8, 136.9, 129.2, 128.2, 126.8, 120.2, 108.0, 107.7, 100.9, 65.6, 61.1, 60.8, 60.2, 57.2, 32.8, 29.1, 25.4, 24.9.

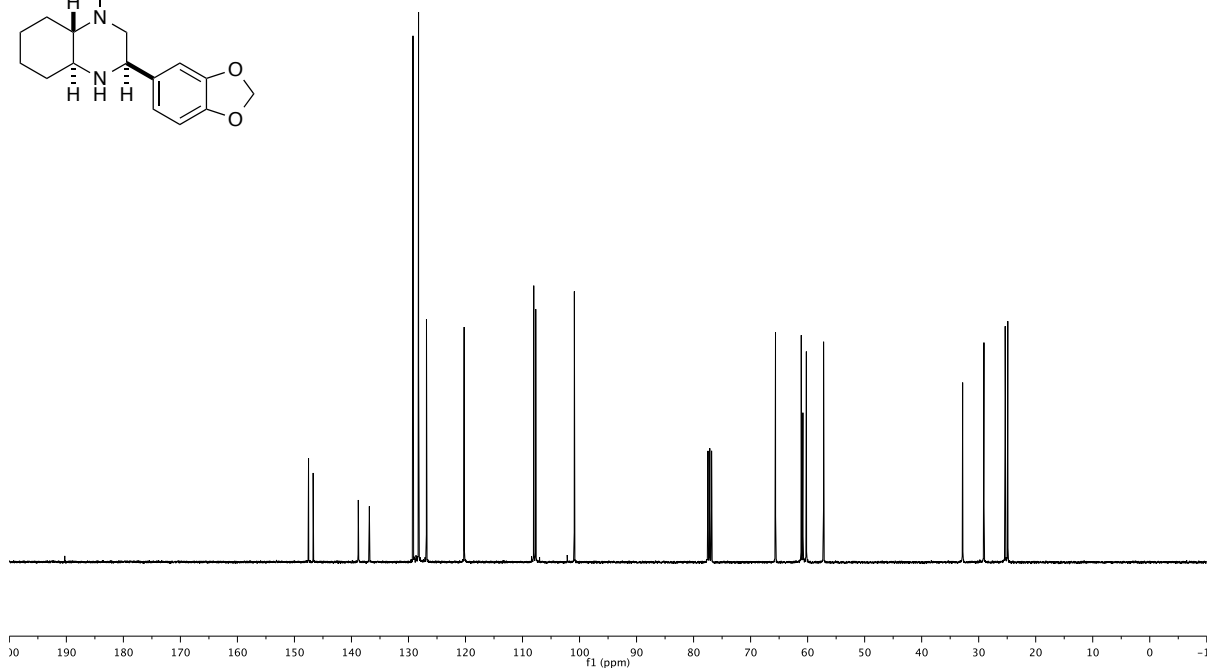

NOESY of (*trans,cis*)-3-(benzo[d][1,3]dioxol-5-yl)-1-benzyldecahydroquinoxaline (19a)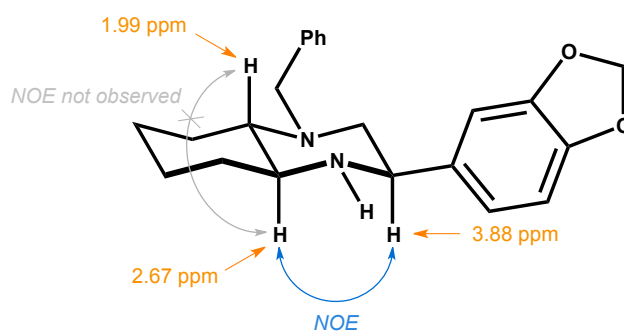

19a

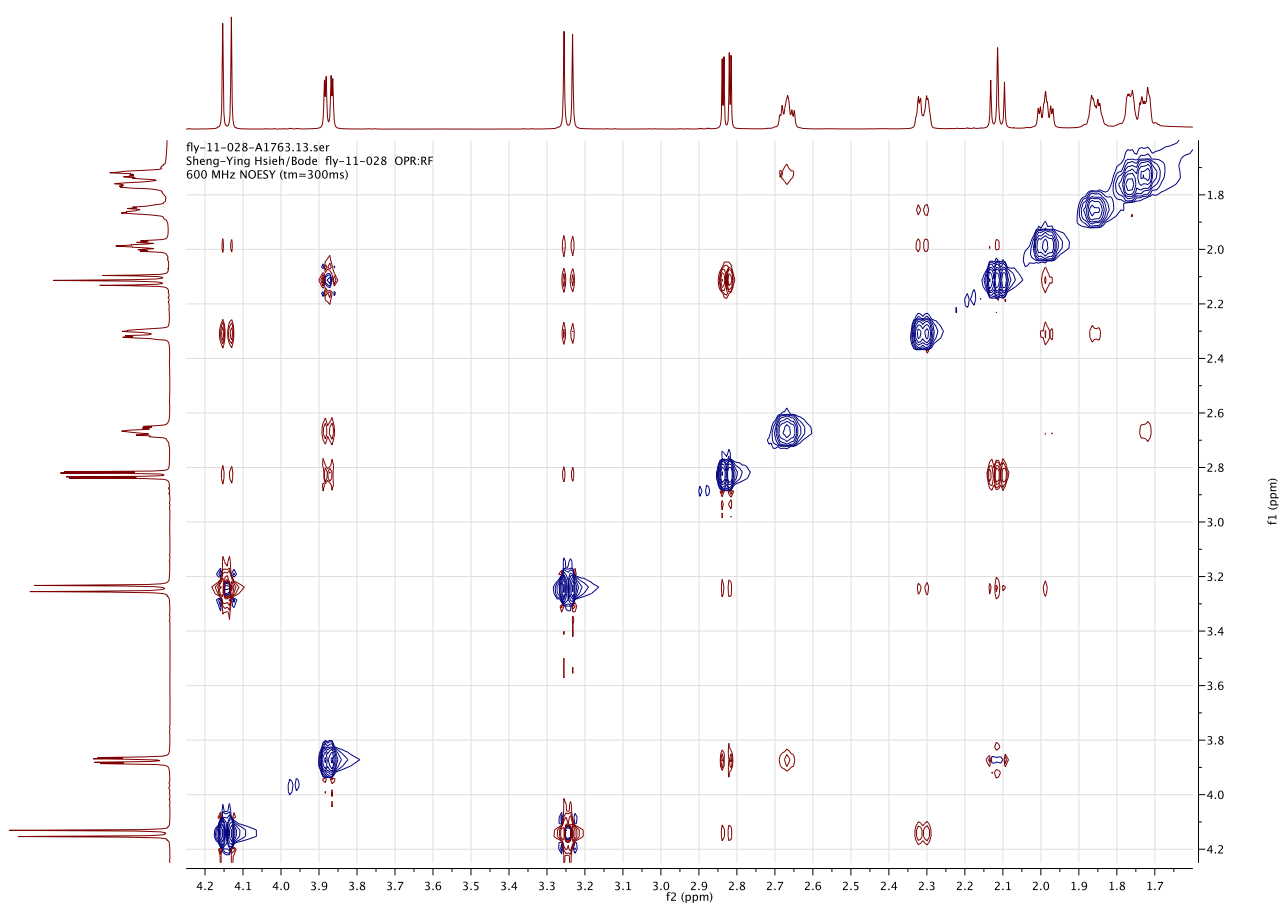



**(*trans,cis*)-1-Benzyl-3-(1-methyl-1*H*-benzo[*d*]imidazol-2-yl)decahydroquinoxaline (19b) (Scheme 3)**

50-09-09-bhsieh.10.fid  
Sample fly-11-029-CC  
group bode

<sup>1</sup>H NMR (400 MHz, CDCl<sub>3</sub>) δ 7.75, 7.74, 7.74, 7.74, 7.73, 7.73, 7.72, 7.72, 7.71, 7.35, 7.34, 7.34, 7.33, 7.32, 7.32, 7.31, 7.31, 7.30, 7.30, 7.29, 7.29, 7.29, 7.28, 7.28, 7.27, 7.27, 7.27, 7.25, 7.25, 7.24, 7.24, 7.23, 7.23, 7.22, 7.22, 7.21, 7.21, 7.20, 7.20, 7.20, 7.20, 4.33, 4.33, 4.31, 4.30, 4.23, 4.20, 3.67, 3.22, 3.19, 3.05, 3.04, 3.02, 3.01, 2.72, 2.71, 2.70, 2.69, 2.69, 2.68, 2.67, 2.66, 2.47, 2.44, 2.44, 2.42, 2.35, 2.35, 2.34, 2.34, 2.32, 2.32, 2.31, 2.31, 2.18, 2.01, 2.01, 2.00, 1.99, 1.98, 1.98, 1.97, 1.96, 1.95, 1.94, 1.91, 1.90, 1.90, 1.89, 1.89, 1.87, 1.87, 1.86, 1.85, 1.85, 1.84, 1.83, 1.81, 1.80, 1.80, 1.80, 1.79, 1.79, 1.78, 1.78, 1.77, 1.77, 1.45, 1.44, 1.43, 1.41, 1.41, 1.40, 1.39, 1.38, 1.37, 1.36, 1.36, 1.35, 1.35, 1.34, 1.33, 1.32, 1.29, 1.28, 1.28, 1.27, 1.26, 1.25, 1.25, 1.24, 1.23, 1.22, 1.22, 1.21, 1.19.

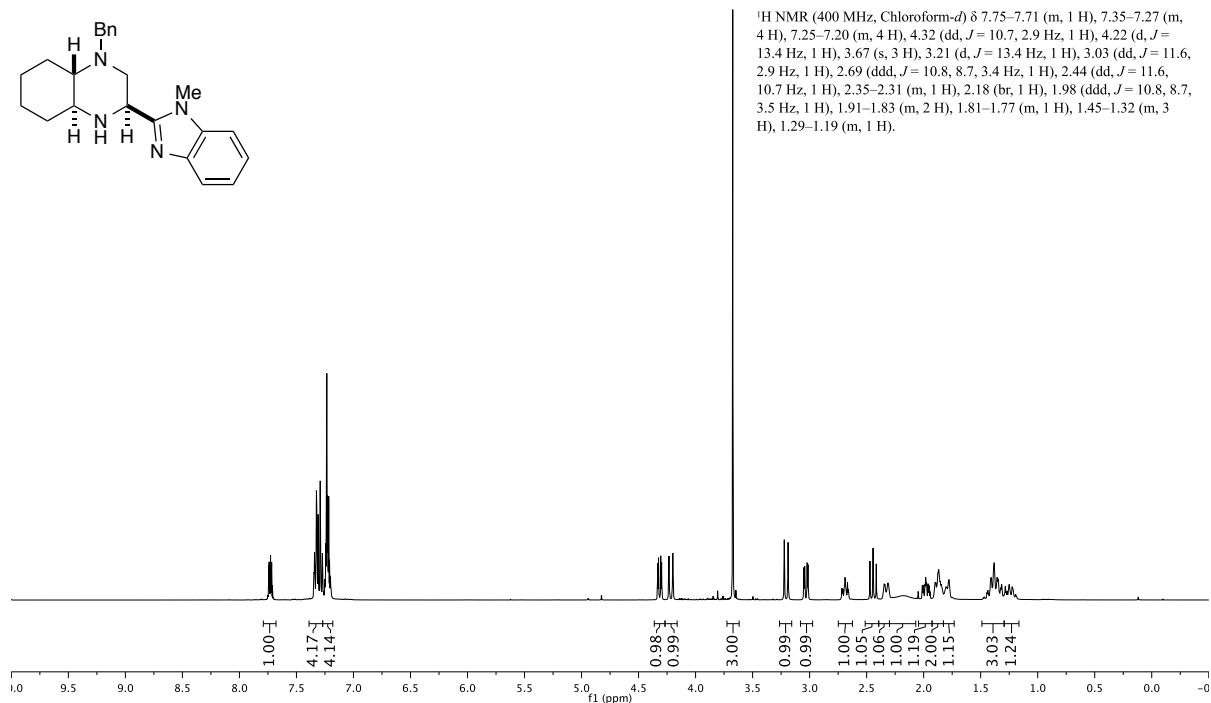

50-09-09-bhsieh.11.fid  
Sample fly-11-029-CC  
group bode

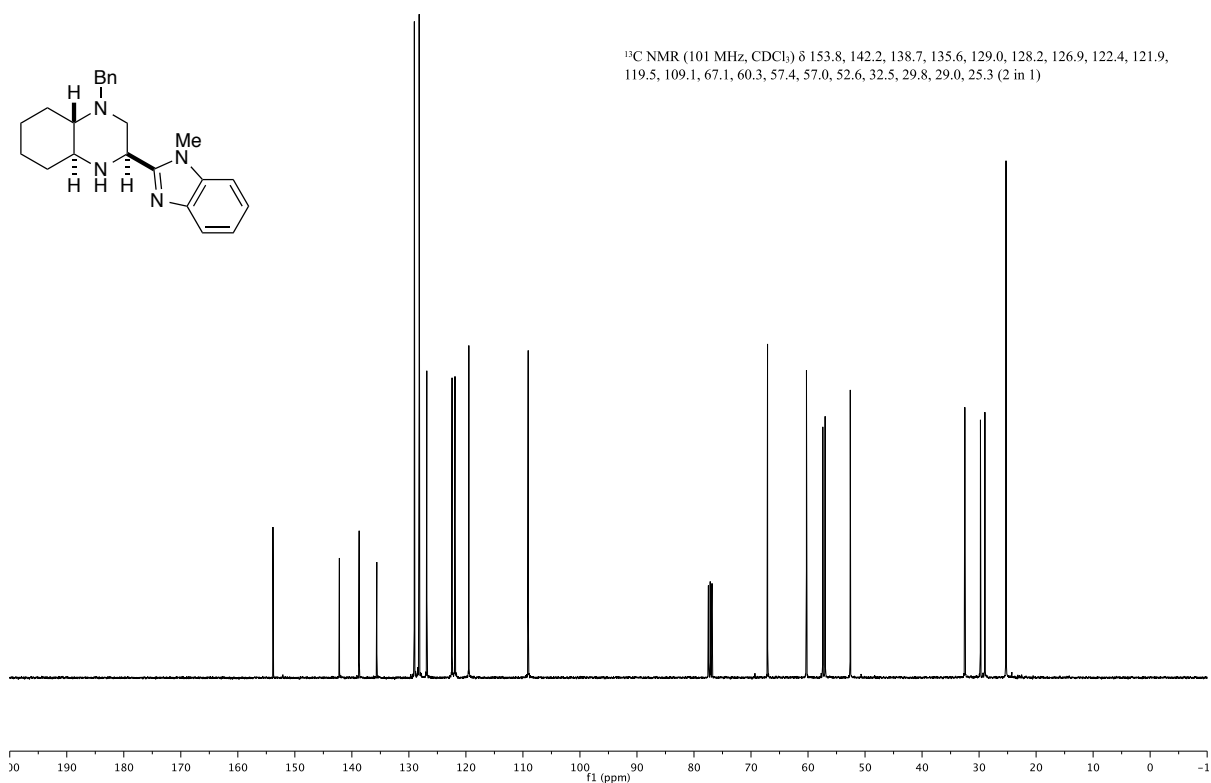

**(*trans,cis*)-1-Benzyl-3-(2-methylprop-1-en-1-yl)decahydroquinoxaline (19c) (Scheme 3)**

11-10-10-bhsieh.10.fid  
Sample fly-11-041-CC  
group bode

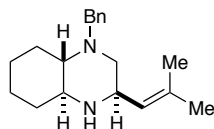

<sup>1</sup>H NMR (400 MHz, CDCl<sub>3</sub>) δ 7.31, 7.30, 7.30, 7.29, 7.29, 7.28, 7.27, 7.27, 7.26, 7.25, 7.24, 7.24, 7.23, 7.23, 7.22, 7.22, 7.21, 7.21, 7.20, 5.07, 5.04, 4.11, 4.08, 3.69, 3.68, 3.66, 3.66, 3.66, 3.65, 3.64, 3.63, 3.21, 3.18, 2.67, 2.66, 2.64, 2.63, 2.29, 2.29, 2.28, 2.28, 2.26, 2.25, 2.24, 2.09, 2.09, 2.07, 2.04, 2.02, 2.01, 1.86, 1.83, 1.83, 1.83, 1.82, 1.81, 1.81, 1.80, 1.80, 1.79, 1.78, 1.78, 1.78, 1.77, 1.77, 1.76, 1.73, 1.72, 1.72, 1.72, 1.71, 1.70, 1.68, 1.68, 1.63, 1.63, 1.61, 1.61, 1.47, 1.47, 1.46, 1.46, 1.45, 1.43, 1.40, 1.40, 1.39, 1.38, 1.36, 1.35, 1.35, 1.33, 1.33, 1.31, 1.30, 1.30, 1.28, 1.27, 1.26, 1.25, 1.21, 1.20, 1.18, 1.17, 1.15, 1.15, 1.14, 1.12, 1.11, 1.11, 1.10.

<sup>1</sup>H NMR (400 MHz, Chloroform-*d*) δ 7.31–7.20 (m, 5 H), 5.06 (d, *J* = 8.8 Hz, 1 H), 4.10 (d, *J* = 13.5 Hz, 1 H), 3.69–3.63 (m, 1 H), 3.19 (d, *J* = 13.5 Hz, 1 H), 2.58–2.65 (m, 1 H), 2.65 (dd, *J* = 11.7, 3.1 Hz, 1 H), 2.29–2.24 (m, 1 H), 2.09–2.01 (m, 2 H), 1.86–1.76 (m, 2 H), 1.73–1.68 (m, 1 H), 1.63 (d, *J* = 1.4 Hz, 3 H), 1.61 (d, *J* = 1.4 Hz, 3 H), 1.47–1.10 (m, 5 H).

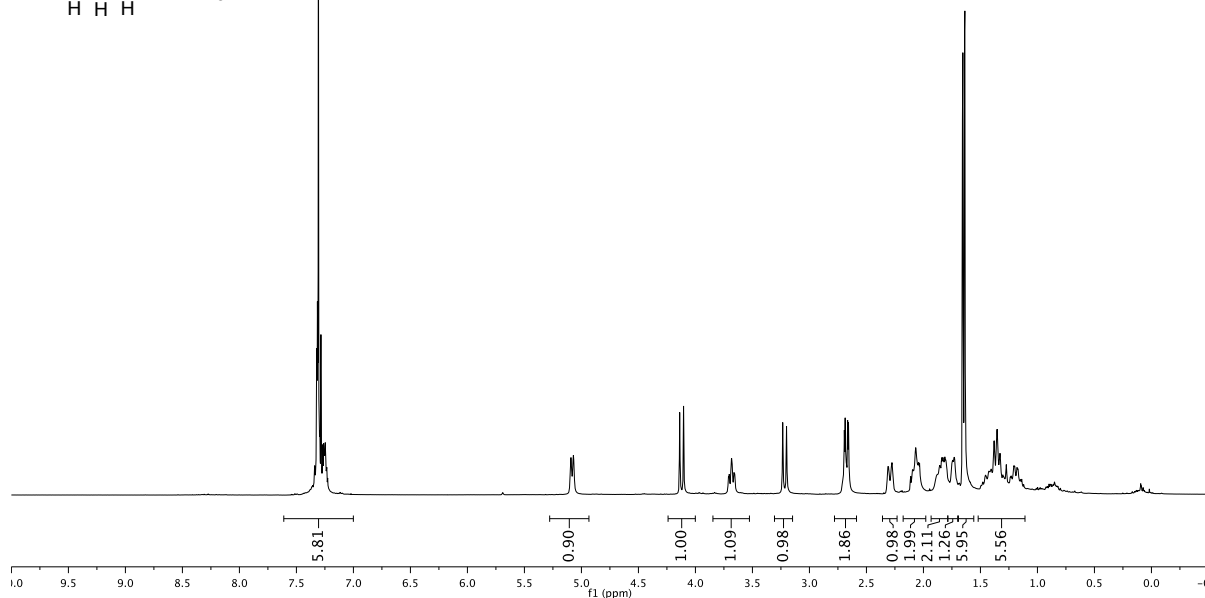

11-10-10-bhsieh.11.fid  
Sample fly-11-041-CC  
group bode

138.7  
136.5  
129.2  
128.3  
123.6

64.8  
60.3  
57.5  
54.0

31.7  
29.1  
25.1  
24.9

18.5

<sup>13</sup>C NMR (101 MHz, CDCl<sub>3</sub>) δ 138.7, 136.5,\* 129.2, 128.3, 127.0, 123.6,\* 64.8, 60.3, 57.5, 57.0, 54.0, 31.7, 29.1, 25.9, 25.1, 24.9, 18.5.

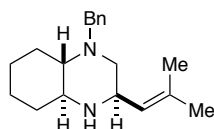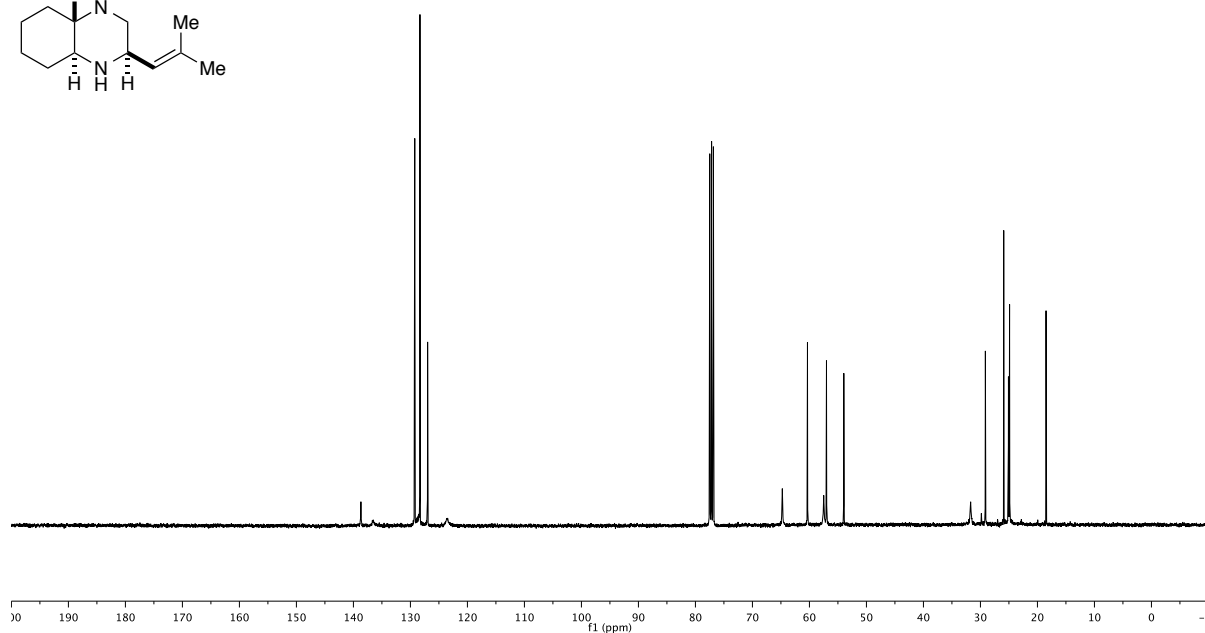

**(3*R*,8*aS*)-3-(2-Chloro-4-fluorophenyl)octahydropyrrolo[1,2-*a*]pyrazine (20a) (Scheme 3)**

55-10-10-bhsieh.10.fid  
Sample fly-11-027-CC  
group bode

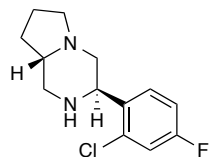

<sup>1</sup>H NMR (400 MHz, CDCl<sub>3</sub>) δ 7.62, 7.61, 7.60, 7.59, 7.08, 7.08, 7.06, 7.05, 6.97, 6.96, 6.95, 6.94, 6.93, 6.92, 4.35, 4.34, 4.33, 4.32, 3.27, 3.26, 3.24, 3.23, 3.22, 3.21, 3.19, 3.18, 3.11, 3.11, 3.09, 3.08, 3.07, 3.06, 2.75, 2.72, 2.72, 2.69, 2.24, 2.20, 2.17, 2.15, 2.13, 2.12, 2.12, 2.10, 2.10, 2.09, 2.08, 2.07, 2.06, 2.06, 2.03, 2.00, 1.98, 1.89, 1.89, 1.88, 1.87, 1.87, 1.86, 1.85, 1.85, 1.84, 1.83, 1.83, 1.82, 1.81, 1.80, 1.78, 1.77, 1.76, 1.75, 1.75, 1.74, 1.74, 1.73, 1.72, 1.72, 1.72, 1.71, 1.70, 1.70, 1.50, 1.48, 1.47, 1.47, 1.46, 1.46, 1.45, 1.45, 1.44, 1.43, 1.41, 1.40.

<sup>1</sup>H NMR (400 MHz, Chloroform-*d*) δ 7.61 (dd, *J* = 8.7, 6.3 Hz, 1 H), 7.07 (dd, *J* = 8.6, 2.7 Hz, 1 H), 6.94 (ddd, *J* = 8.7, 8.3, 2.7 Hz, 1 H), 4.34 (dd, *J* = 10.1, 2.9 Hz, 1 H), 3.25 (dd, *J* = 11.0, 2.9 Hz, 1 H), 3.20 (dd, *J* = 10.6, 2.9 Hz, 1 H), 3.09 (ddd, *J* = 8.7, 8.6, 2.3 Hz, 1 H), 2.72 (dd, *J* = 11.0, 10.0 Hz, 1 H), 2.24 (br, 1 H), 2.16 (ddd, *J* = 8.8, 8.8, 8.7 Hz, 1H), 2.09 (dddd, *J* = 10.0, 6.5, 6.0, 2.9 Hz, 1 H), 2.00 (dd, *J* = 10.6, 10.1 Hz, 1 H), 1.89–1.80 (m, 2 H), 1.78–1.70 (m, 1 H), 1.50–1.40 (m, 1 H).

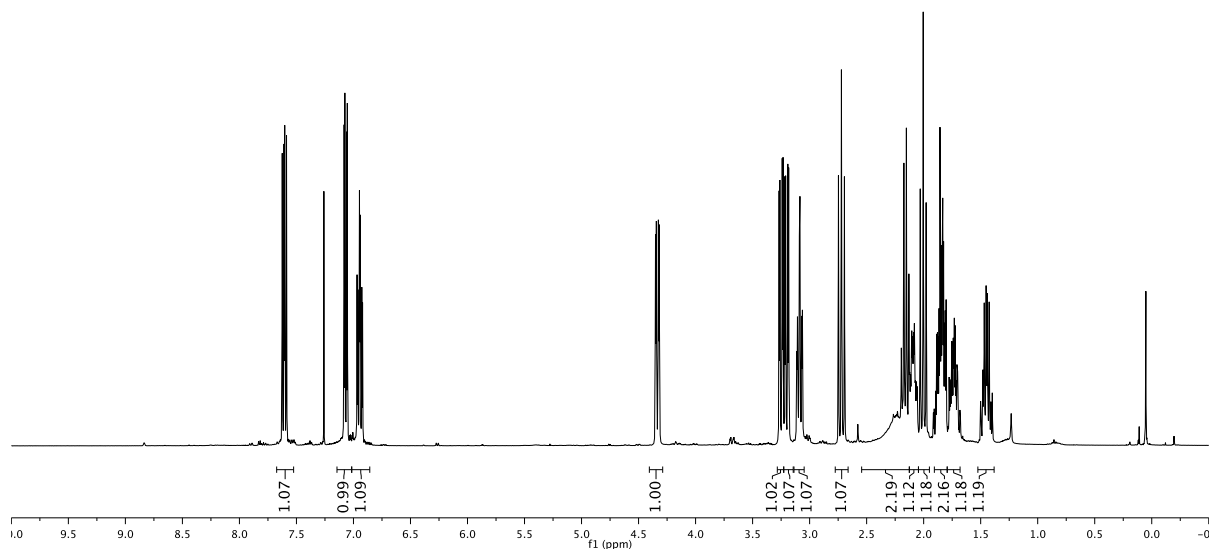

55-10-10-bhsieh.11.fid  
Sample fly-11-027-CC  
group bode

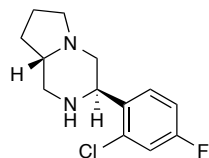

<sup>13</sup>C NMR (101 MHz, CDCl<sub>3</sub>) δ 162.8, 160.3, 135.6, 135.6, 133.8, 133.7, 129.4, 129.3, 116.9, 116.7, 114.3, 114.1, 62.8, 58.3, 55.4, 53.5, 51.0, 27.4, 21.3.

<sup>13</sup>C NMR (101 MHz, Chloroform-*d*) δ 161.6 (d, *J* = 249.0 Hz), 135.6 (d, *J* = 3.5 Hz), 133.8 (d, *J* = 10.1 Hz), 129.4 (d, *J* = 8.6 Hz), 116.8 (d, *J* = 24.5 Hz), 114.2 (d, *J* = 20.6 Hz), 62.8, 58.3, 55.4, 53.5, 51.0, 27.4, 21.3.

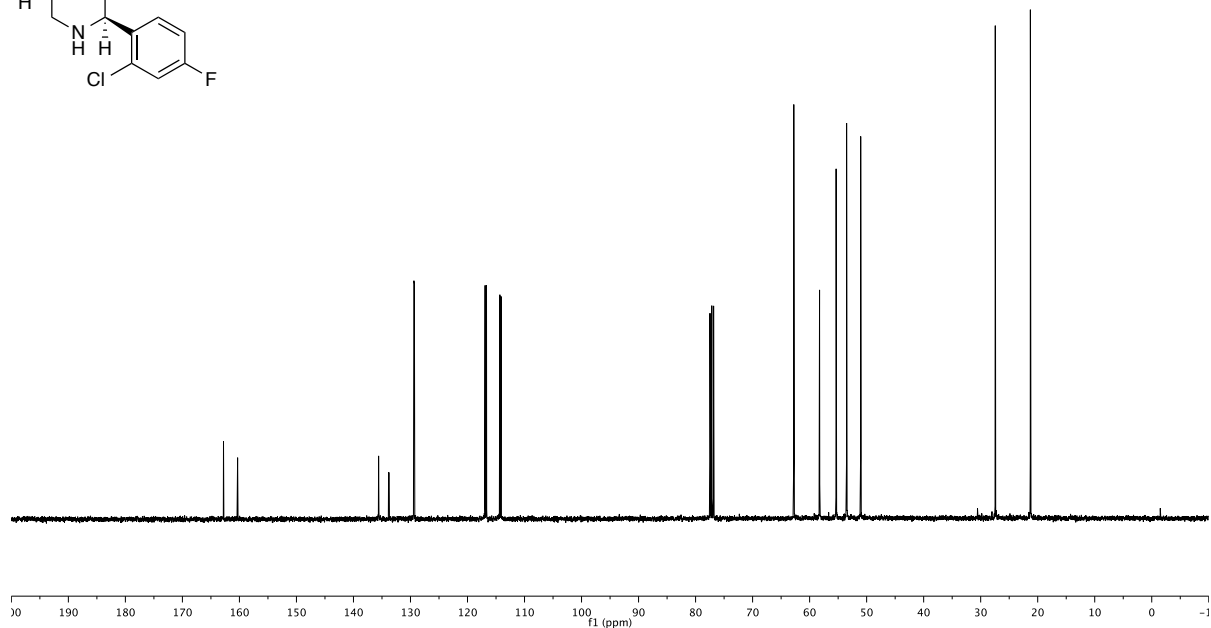

**(3*R*,8*aS*)-3-(5-Methyl-1-phenyl-1*H*-pyrazol-4-yl)octahydropyrrolo[1,2-*a*]pyrazine (20b) (Scheme 3)**

17-11-10-bhsieh.10.fid  
Sample fly-11-070-CC  
group bode  
PRO CDCl<sub>3</sub> /opt/v bhsieh 17

<sup>1</sup>H NMR (400 MHz, CDCl<sub>3</sub>) δ 7.67, 7.45, 7.45, 7.45, 7.44, 7.44, 7.43, 7.43, 7.43, 7.42, 7.42, 7.41, 7.41, 7.40, 7.39, 7.39, 7.38, 7.38, 7.37, 7.37, 7.37, 7.36, 7.36, 7.35, 7.35, 7.34, 7.34, 7.33, 7.33, 7.32, 3.95, 3.94, 3.93, 3.92, 3.74, 3.24, 3.23, 3.21, 3.20, 3.16, 3.15, 3.13, 3.12, 3.12, 3.10, 3.09, 3.08, 3.07, 2.70, 2.68, 2.67, 2.65, 2.37, 2.35, 2.32, 2.30, 2.25, 2.23, 2.21, 2.19, 2.17, 2.17, 2.16, 2.15, 2.14, 2.13, 2.13, 2.12, 2.12, 2.11, 2.10, 1.91, 1.90, 1.89, 1.89, 1.88, 1.88, 1.87, 1.86, 1.86, 1.85, 1.85, 1.84, 1.84, 1.83, 1.82, 1.81, 1.81, 1.79, 1.78, 1.77, 1.76, 1.76, 1.76, 1.75, 1.74, 1.74, 1.73, 1.73, 1.72, 1.72, 1.71, 1.70, 1.45, 1.43, 1.42, 1.41, 1.40, 1.39, 1.38, 1.36, 1.36, 1.35.

<sup>1</sup>H NMR (400 MHz, Chloroform-*d*) δ 7.67 (s, 1 H), 7.45–7.32 (m, 5 H), 3.93 (dd, *J* = 10.5, 3.1 Hz, 1 H), 3.74 (br, 1 H), 3.22 (dd, *J* = 11.6, 2.8 Hz, 1 H), 3.14 (dd, *J* = 10.8, 3.1 Hz, 1 H), 3.12–3.07 (m, 1 H), 2.67 (dd, *J* = 11.6, 10.1 Hz, 1 H), 2.35 (dd, *J* = 10.8, 10.5 Hz, 1 H), 2.30 (s, 3 H), 2.22 (ddd, *J* = 8.9, 8.9, 8.9 Hz, 1 H), 2.14 (dddd, *J* = 10.2, 6.0, 3.6, 2.8 Hz, 1 H), 1.91–1.81 (m, 2 H), 1.79–1.70 (m, 1 H), 1.45–1.43 (m, 1 H).

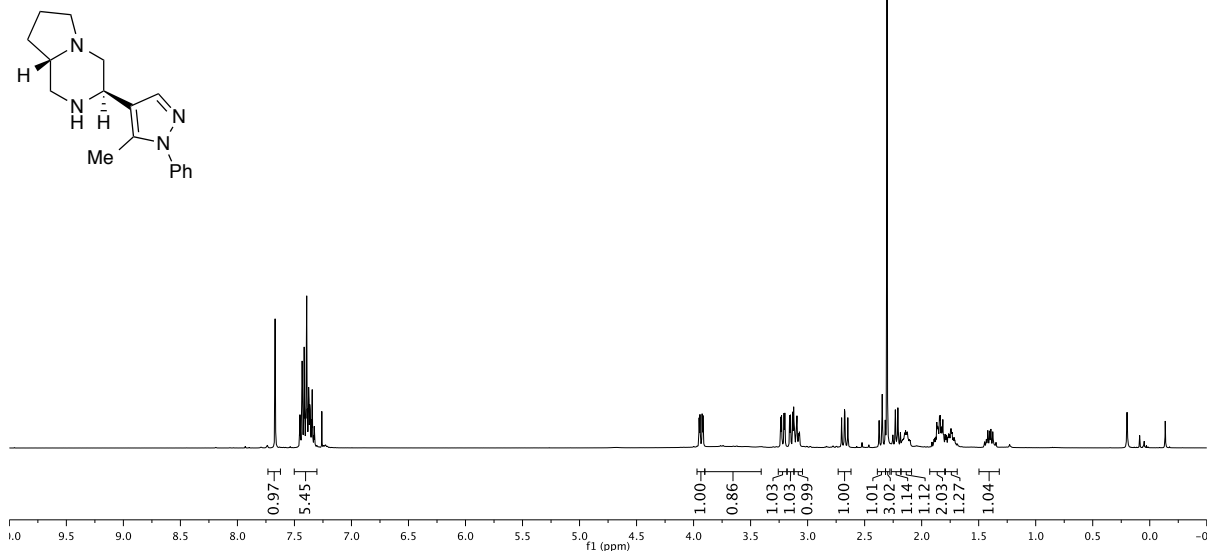

17-11-10-bhsieh.11.fid  
Sample fly-11-070-CC  
group bode  
CAR CDCl<sub>3</sub> /opt/v bhsieh 17

139.9, 138.5, 136.4, 129.1, 127.8, 125.1, 119.8, 62.5, 58.7, 53.6, 51.3, 50.8, 27.4, 21.1, 11.1

<sup>13</sup>C NMR (101 MHz, CDCl<sub>3</sub>) δ 139.9, 138.5, 136.4, 129.1, 127.8, 125.1, 119.8, 62.5, 58.7, 53.6, 51.3, 50.8, 27.4, 21.1, 11.1.

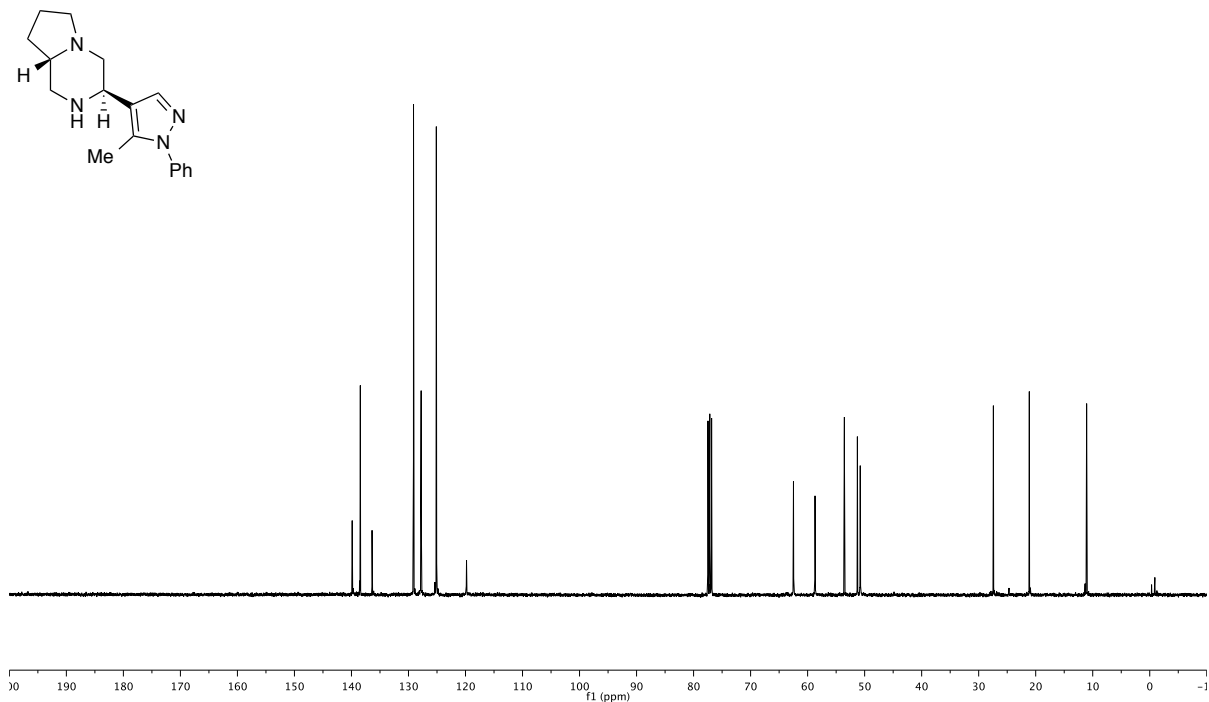

**(*R*)-tert-Butyl 2,2-dimethyl-4-((3*S*,8*aS*)-octahydropyrrolo[1,2-*a*]pyrazin-3-yl)oxazolidine-3-carboxylate (20c) (Scheme 3)**

12-11-10-bhsieh.10.fid  
Sample fly-11-030-CC  
group bode

<sup>1</sup>H NMR (400 MHz, CDCl<sub>3</sub>) δ 4.15, 4.07, 3.95, 3.89, 3.87, 3.86, 3.85, 3.30, 3.27, 3.20, 3.17, 3.14, 3.12, 3.12, 3.10, 3.09, 2.68, 2.65, 2.62, 2.29, 2.27, 2.25, 2.23, 2.17, 2.14, 2.11, 1.89, 1.88, 1.87, 1.87, 1.86, 1.85, 1.84, 1.83, 1.83, 1.82, 1.81, 1.80, 1.80, 1.79, 1.78, 1.77, 1.76, 1.76, 1.75, 1.74, 1.73, 1.73, 1.72, 1.72, 1.71, 1.70, 1.54, 1.45, 1.44, 1.44, 1.43, 1.42, 1.39.

<sup>1</sup>H NMR (400 MHz, Chloroform-*d*) δ 4.15 (br, 1 H), 4.07 (br, 1 H), 3.95 (br, 1 H), 3.87 (dd, *J* = 9.4, 6.4 Hz, 1 H), 3.28 (d, *J* = 10.6 Hz, 1 H), 3.18 (d, *J* = 10.6 Hz, 1 H), 3.14–3.09 (m, 2 H), 2.65 (dd, *J* = 10.9, 10.9 Hz, 1 H), 2.26 (ddd, *J* = 8.8, 8.2, 8.2 Hz, 1 H), 2.17–2.13 (m, 2 H), 1.87–1.71 (m, 3 H), 1.54 (s, 3 H), 1.45–1.39 (m, 13 H).

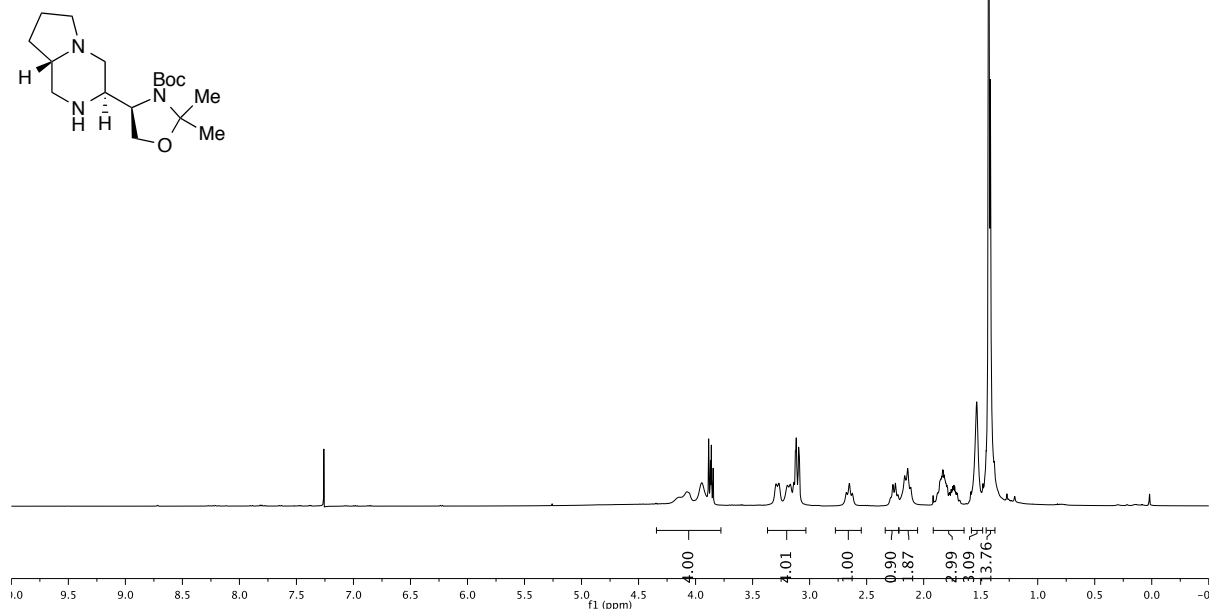

12-11-10-bhsieh.11.fid  
Sample fly-11-030-CC  
group bode

153.0  
152.3  
94.3  
93.9  
80.6  
64.2  
62.8  
59.3  
58.9  
56.0  
53.5  
53.2  
52.8  
49.9  
28.5  
27.0  
26.9  
26.1  
23.9  
22.4  
21.0

<sup>13</sup>C NMR (101 MHz, CDCl<sub>3</sub>) δ 153.0\*, 152.3, 94.3, 93.9\*, 80.6\*, 64.2\*, 62.8\*, 59.3\*, 58.9, 56.0\*, 53.5\*, 53.2\*, 52.8, 49.9\*, 28.5\*, 27.0\*, 26.9\*, 26.1, 23.9\*, 22.4, 21.0\*.

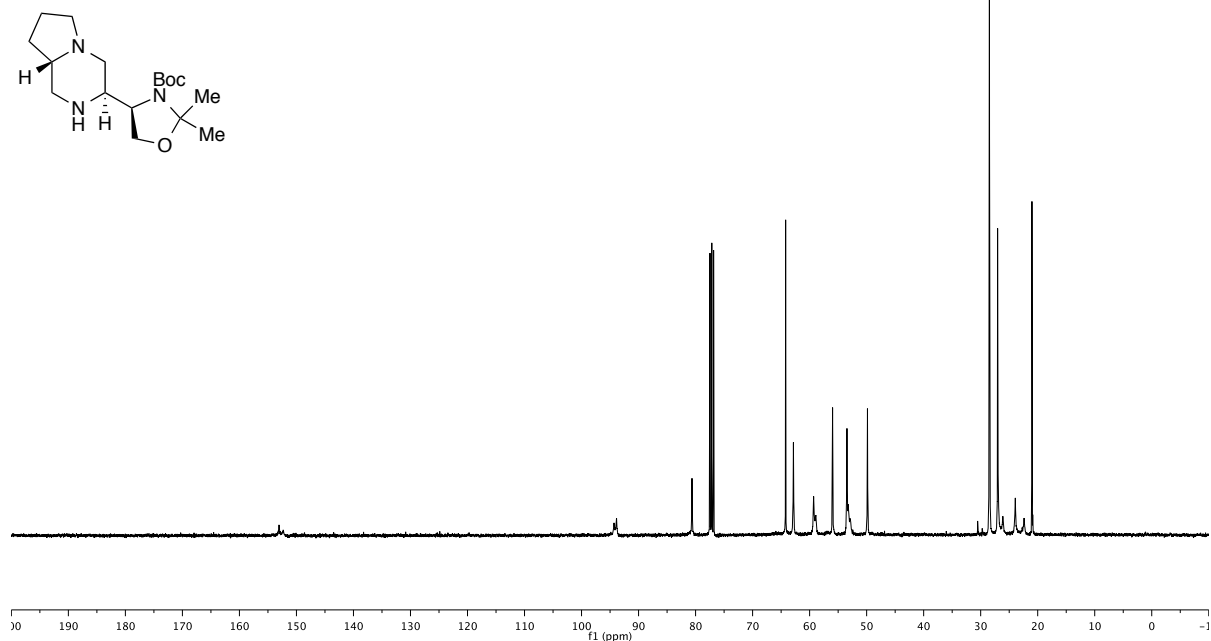

***cis*-3-Mesityloctahydro-1*H*-pyrido[1,2-*a*]pyrazine (21a) (Scheme 3)**

15-11-10-bhsieh.10.fid  
Sample fly-11-031-CC  
group bode  
PRO CDCl<sub>3</sub> /opt/v bhsieh 15

<sup>1</sup>H NMR (400 MHz, CDCl<sub>3</sub>) δ 6.79, 4.59, 4.59, 4.57, 4.56, 3.02, 3.02, 3.00, 2.99, 2.94, 2.91, 2.86, 2.83, 2.81, 2.77, 2.76, 2.74, 2.74, 2.69, 2.66, 2.63, 2.50, 2.27, 2.27, 2.25, 2.24, 2.23, 2.21, 2.20, 2.18, 2.17, 1.83, 1.83, 1.82, 1.82, 1.81, 1.81, 1.80, 1.79, 1.69, 1.69, 1.68, 1.68, 1.67, 1.65, 1.65, 1.64, 1.62, 1.62, 1.61, 1.60, 1.59, 1.59, 1.58, 1.48, 1.48, 1.45, 1.45, 1.42, 1.40, 1.39, 1.38, 1.37, 1.36, 1.34, 1.34, 1.33, 1.30.

<sup>1</sup>H NMR (400 MHz, Chloroform-*d*) δ 6.79 (s, 2 H), 4.58 (dd, *J* = 11.2, 3.2 Hz, 1 H), 3.01 (dd, *J* = 11.6, 2.9 Hz, 1 H), 2.92 (d, *J* = 11.6 Hz, 1 H), 2.83 ddt, *J* = 11.6, 10.9 Hz, 1 H), 2.75 (dd, *J* = 11.5, 3.2 Hz, 1 H), 2.66 (dd, *J* = 11.5, 11.2 Hz, 1 H), 2.50 (s, 6 H), 2.21 (s, 3 H), 2.27–2.17 (m, 2 H), 1.83–1.79 (m, 2 H), 1.69–1.58 (m, 2 H), 1.48–1.30 (m, 2 H).

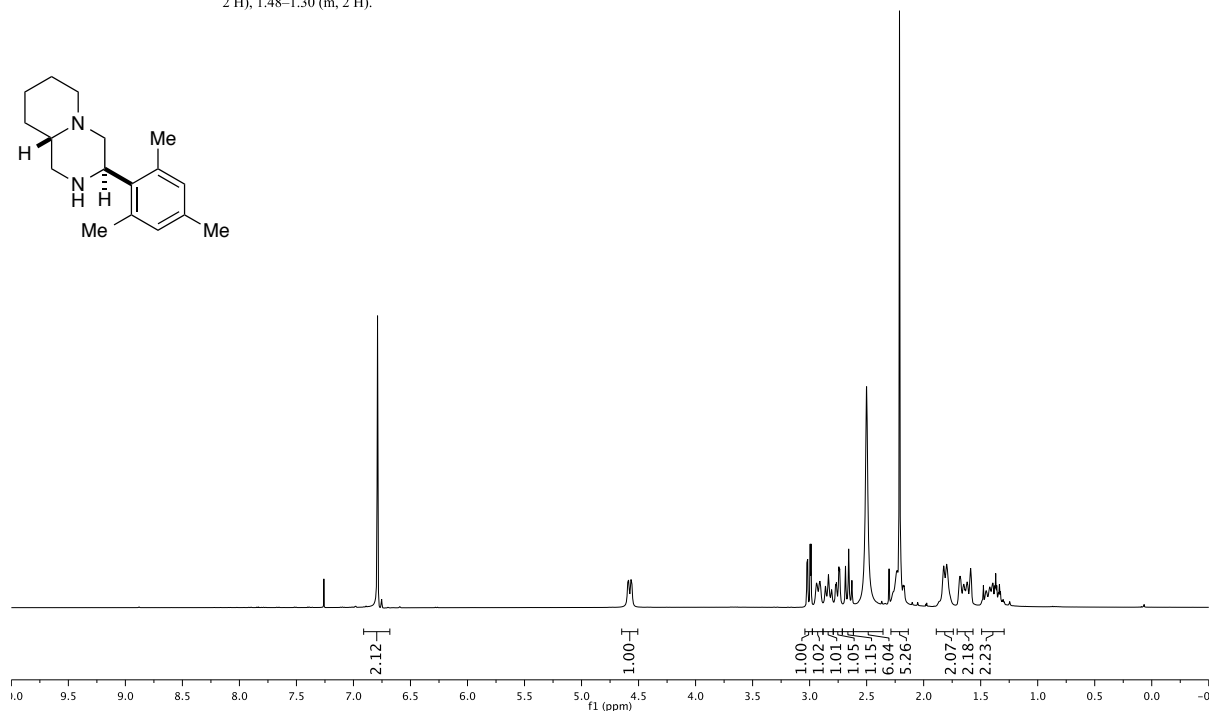

15-11-10-bhsieh.11.fid  
Sample fly-11-031-CC  
group bode  
CAR CDCl<sub>3</sub> /opt/v bhsieh 15

137.4  
136.7  
133.4  
130.3

62.2  
57.6  
56.6  
55.5

29.0  
24.9  
23.8  
21.7

<sup>13</sup>C NMR (101 MHz, CDCl<sub>3</sub>) δ 137.4, 136.7, 133.4, 130.3, 62.2, 57.6, 56.8, 55.6, 52.5, 29.0, 24.9, 23.8, 21.7, 20.7.

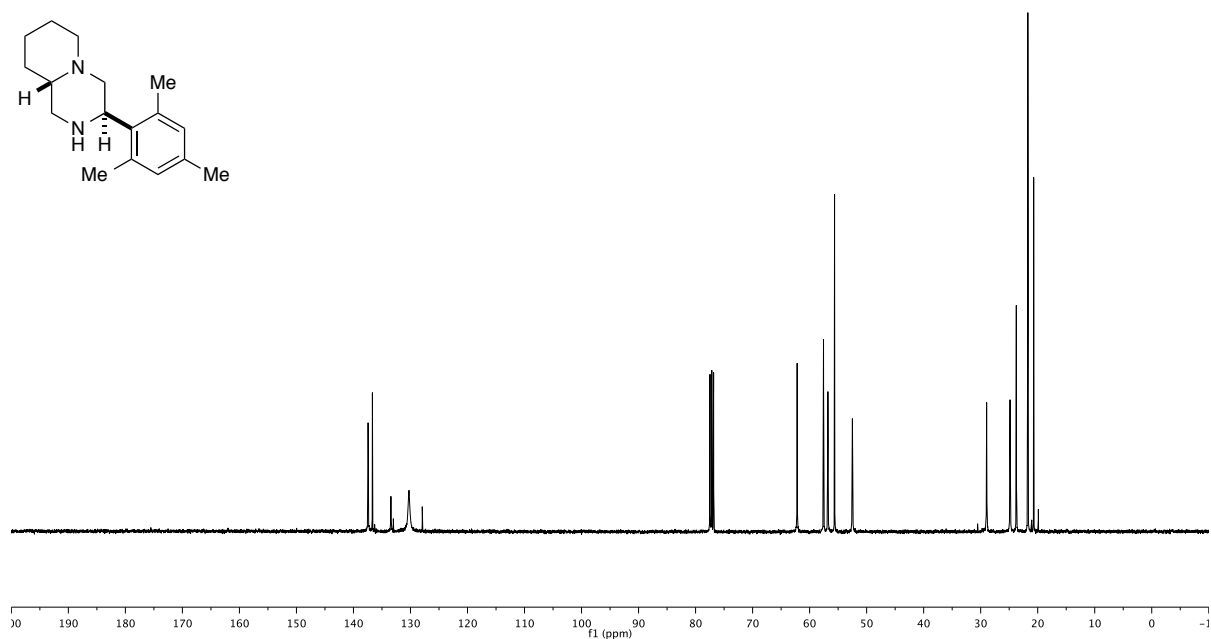

***cis*-3-(Pyrimidin-2-yl)octahydro-1*H*-pyrido[1,2-*a*]pyrazine (21b) (Scheme 3)**

42-31-10-bhsieh.10.fid  
Sample fly-11-081-A  
group bode

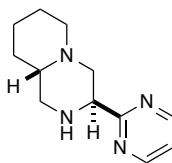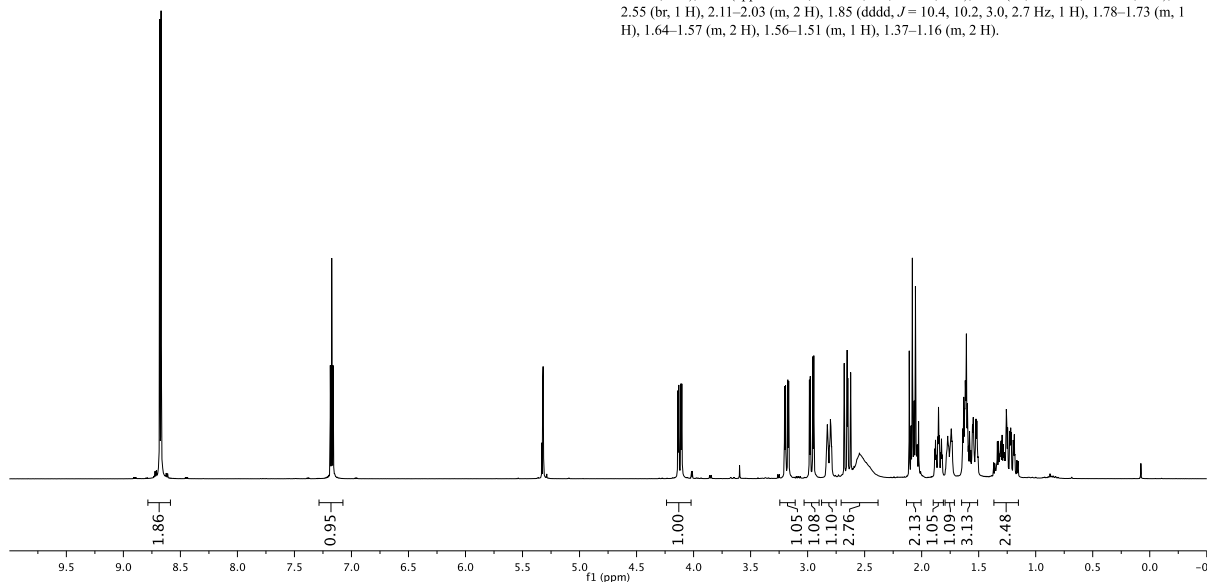

42-31-10-bhsieh.11.fid  
Sample fly-11-081-A  
group bode

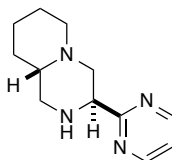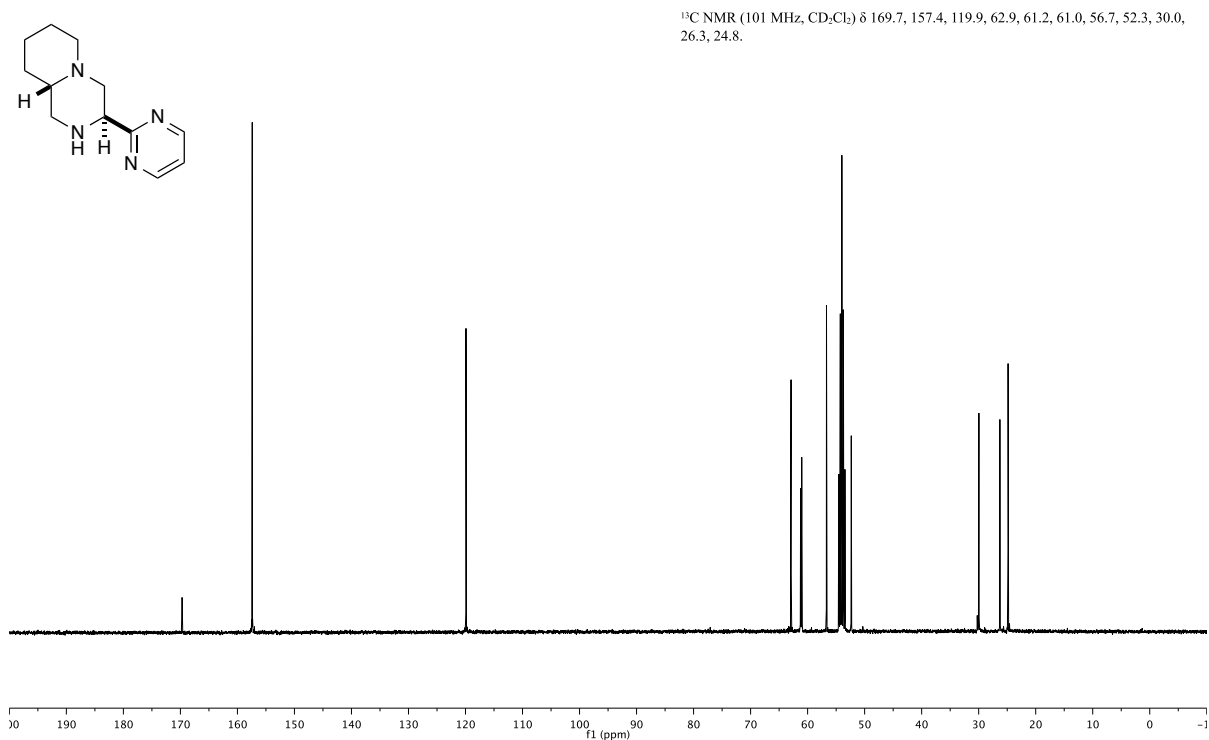

NOESY of *cis*-3-(pyrimidin-2-yl)octahydro-1*H*-pyrido[1,2-*a*]pyrazine (21b)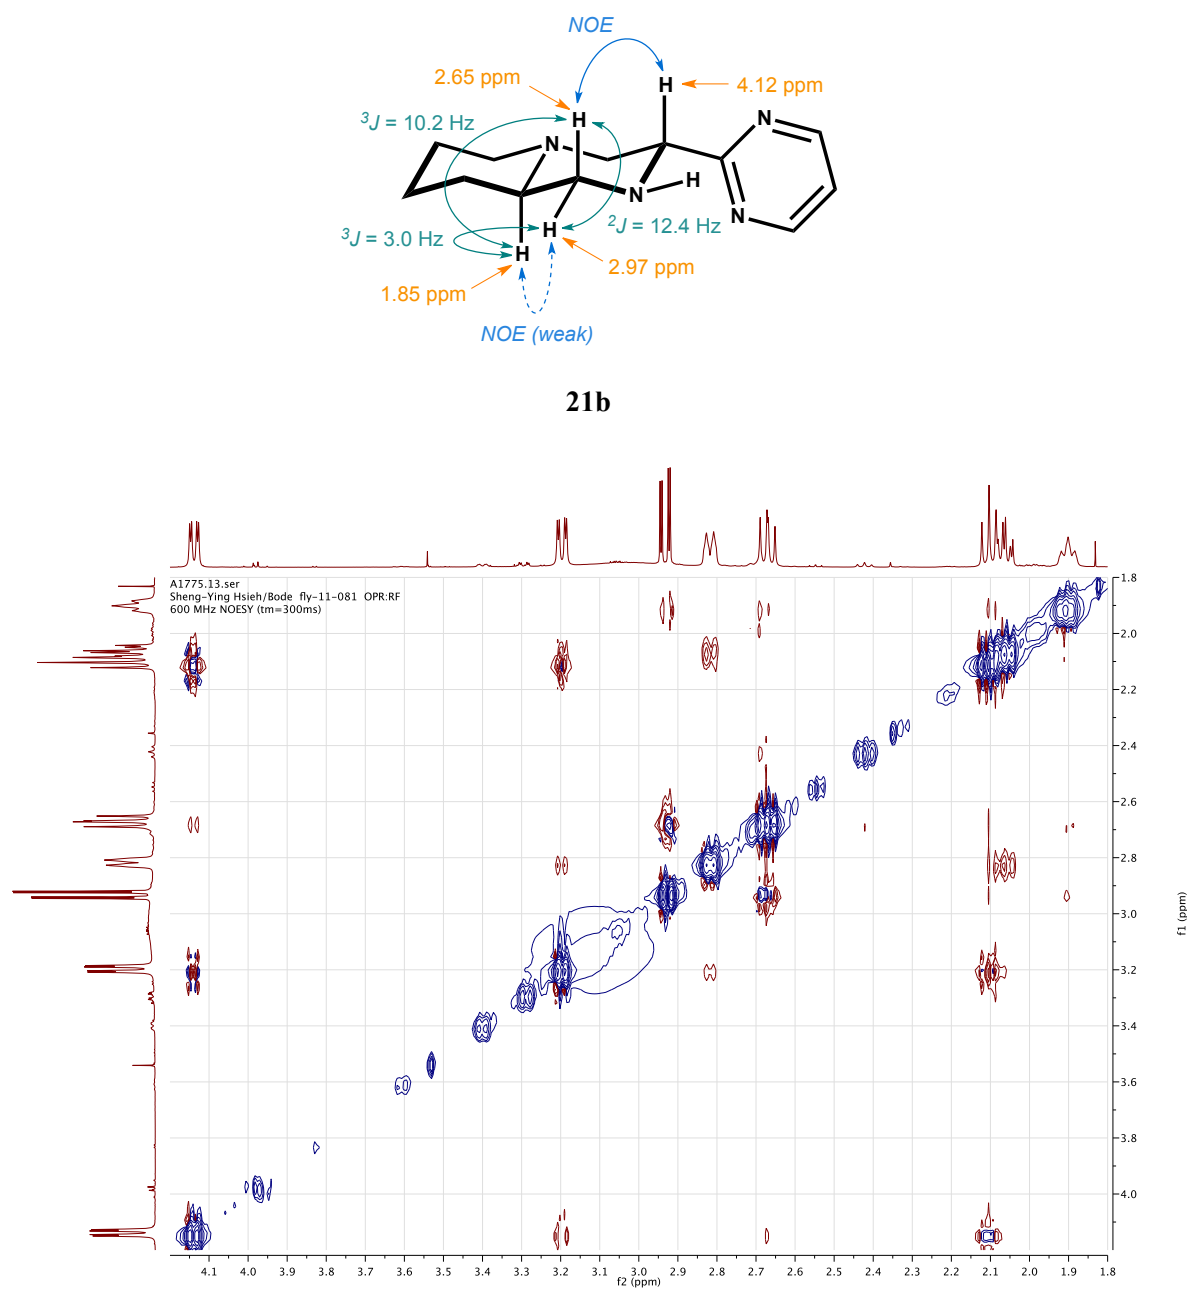



***tert*-Butyl octahydrospiro[azetidine-3,3'-pyrido[1,2-*a*]pyrazine]-1-carboxylate (21c) (Scheme 3)**

43-31-10-bhsieh.10.fid  
Sample fly-11-071-B  
group bode

<sup>1</sup>H NMR (400 MHz, CDCl<sub>3</sub>) δ 3.98, 3.96, 3.72, 3.70, 3.67, 3.65, 3.55, 3.53, 2.84, 2.81, 2.74, 2.74, 2.73, 2.72, 2.71, 2.70, 2.69, 2.51, 2.48, 2.45, 2.14, 2.12, 2.05, 2.04, 2.02, 2.01, 2.00, 2.00, 1.99, 1.98, 1.84, 1.81, 1.79, 1.75, 1.74, 1.74, 1.73, 1.73, 1.72, 1.72, 1.71, 1.70, 1.69, 1.61, 1.60, 1.59, 1.58, 1.57, 1.57, 1.56, 1.55, 1.54, 1.53, 1.52, 1.51, 1.49, 1.48, 1.48, 1.47, 1.47, 1.46, 1.45, 1.45, 1.44, 1.44, 1.43, 1.42, 1.41, 1.41, 1.39, 1.38, 1.36, 1.36, 1.31, 1.31, 1.30, 1.28, 1.27, 1.27, 1.25, 1.25, 1.25, 1.24, 1.23, 1.22, 1.22, 1.21, 1.21, 1.20, 1.20, 1.16, 1.16, 1.13, 1.12, 1.11, 1.10.

<sup>1</sup>H NMR (400 MHz, Chloroform-*d*) δ 3.97 (d, *J* = 8.9 Hz, 1 H), 3.71 (d, *J* = 8.9 Hz, 1 H), 3.66 (d, *J* = 9.2 Hz, 1 H), 3.54 (d, *J* = 9.2 Hz, 1 H), 2.83 (d, *J* = 11.1 Hz, 1H), 2.74–2.69 (m, 2 H), 2.48 (t, *J* = 11.0, 11.0 Hz, 1 H), 2.13 (d, *J* = 11.1 Hz, 1 H), 2.02 (ddd, *J* = 11.2, 11.1, 4.3 Hz, 1 H), 1.81 (apparent t, *J* = 10.5 Hz, 1 H), 1.75–1.69 (m, 1 H), 1.61–1.51 (m, 2 H), 1.49–1.42 (m, 1 H), 1.41 (s, 9 H), 1.31–1.20 (m, 2 H), 1.16–1.10 (m, 1 H).

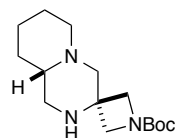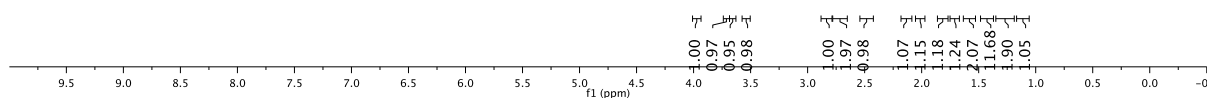

43-31-10-bhsieh.11.fid  
Sample fly-11-071-B  
group bode

156.6

79.5

61.0

60.8

58.8

56.0

52.4

48.6

29.4

28.5

25.6

24.1

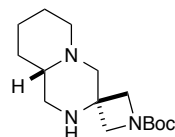

<sup>13</sup>C NMR (101 MHz, CDCl<sub>3</sub>) δ 156.6, 79.5, 63.0, 61.4, 60.8, 58.8, 56.0, 52.4, 48.6, 29.4, 28.5, 25.6, 24.1.

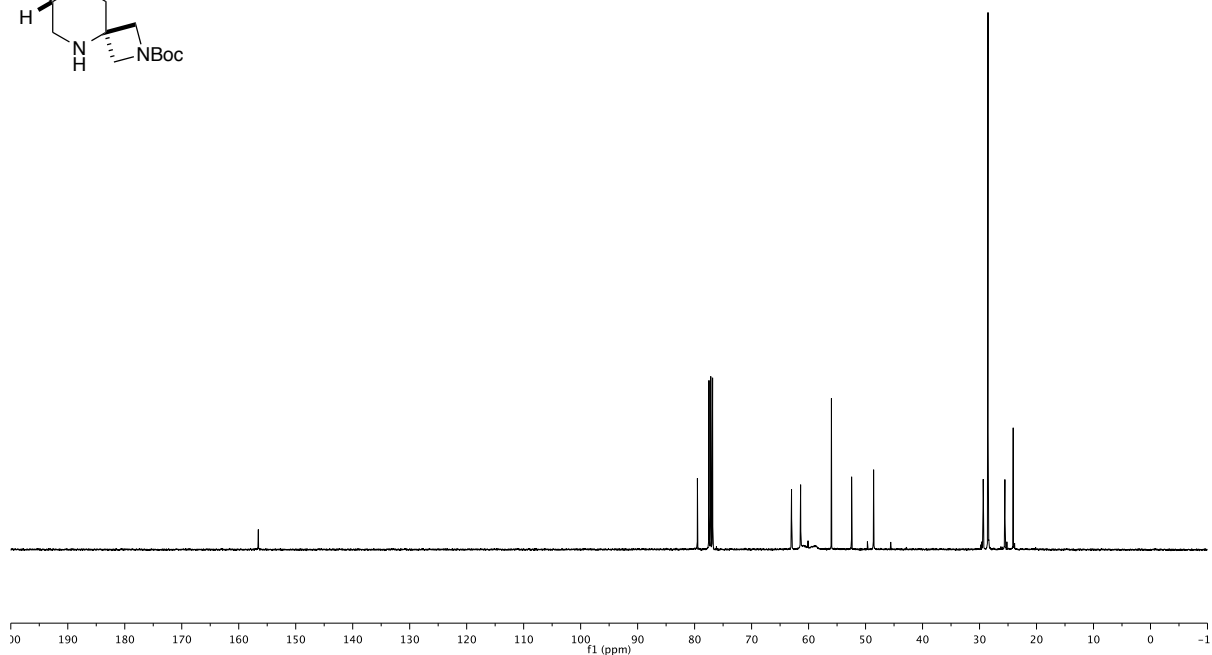

***tert*-Butyl 4-benzyl-2-(4-fluorophenyl)piperazine-1-carboxylate (22)**

31-09-03-bhsieh.10.fid  
Sample fly-11-157-CC  
group bode

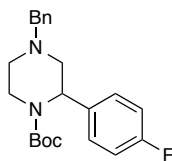

<sup>1</sup>H NMR (400 MHz, CDCl<sub>3</sub>) δ 7.43, 7.43, 7.42, 7.41, 7.41, 7.40, 7.39, 7.35, 7.35, 7.34, 7.33, 7.33, 7.32, 7.31, 7.30, 7.29, 7.29, 7.28, 7.28, 7.27, 7.26, 7.25, 7.25, 7.01, 7.01, 7.00, 6.99, 6.99, 6.98, 6.98, 6.97, 6.96, 6.95, 5.21, 3.92, 3.89, 3.60, 3.57, 3.46, 3.43, 3.23, 3.20, 3.04, 3.01, 3.01, 2.98, 2.97, 2.84, 2.81, 2.44, 2.43, 2.41, 2.40, 2.20, 2.18, 2.17, 2.15, 1.48.

<sup>1</sup>H NMR (400 MHz, Chloroform-*d*) δ 7.43–7.39 (m, 2 H), 7.35–7.25 (m, 5 H), 7.01–6.95 (m, 2 H), 5.21 (apparent s, 1 H), 3.90 (apparent d, *J* = 13.5 Hz, 1 H), 3.58 (d, *J* = 13.0 Hz, 1 H), 3.45 (d, *J* = 13.0 Hz, 1 H), 3.22 (apparent d, *J* = 12.0, 1 H), 3.00 (dt, *J* = 13.5, 7.1 Hz, 1 H), 2.83 (apparent d, *J* = 11.2 Hz, 1 H), 2.42 (dd, *J* = 12.0, 4.2 Hz, 1 H), 2.18 (apparent t, *J* = 11.2 Hz, 1 H), 1.48 (s, 9 H).

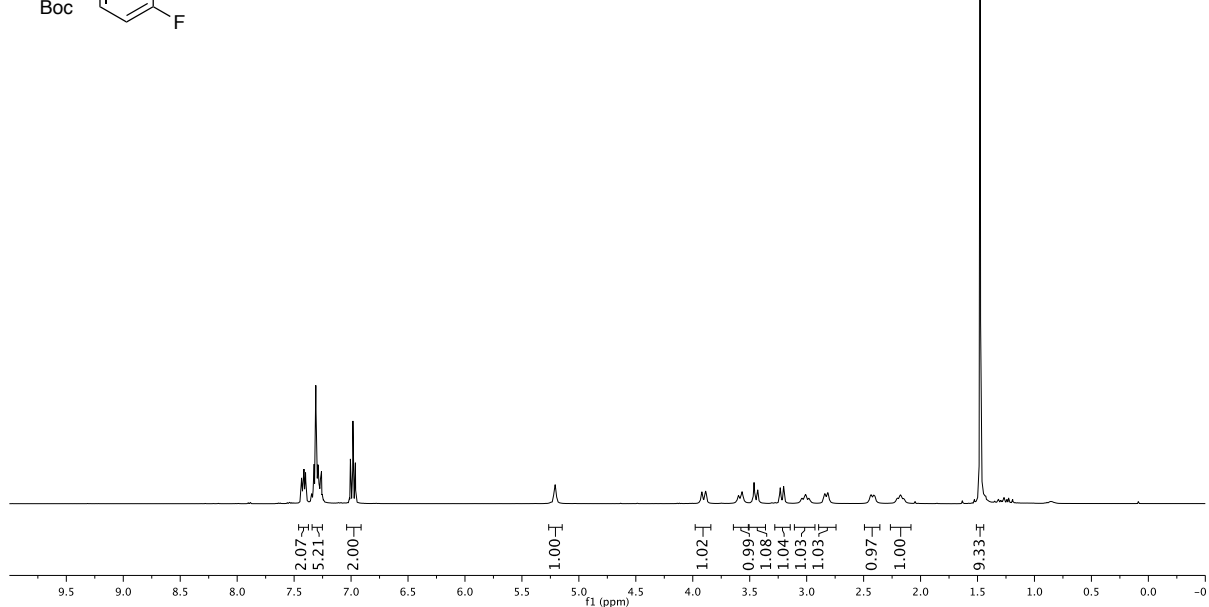

31-09-03-bhsieh.11.fid  
Sample fly-11-157-CC  
group bode

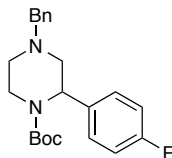

<sup>13</sup>C NMR (101 MHz, CDCl<sub>3</sub>) δ 163.1, 160.6, 155.0, 137.9, 136.4, 129.6, 129.5, 129.3, 128.4, 127.4, 115.0, 114.8, 80.2, 63.2, 55.2, 53.4, 52.8, 39.9, 28.6.

<sup>13</sup>C NMR (101 MHz, Chloroform-*d*) δ 161.9 (d, *J* = 245.0 Hz), 155.0, 137.9 (apparent s), 136.4, 129.6 (d, *J* = 7.8 Hz), 129.3, 128.4, 127.4, 114.9 (d, *J* = 21.0 Hz), 80.2, 63.2, 55.2, 53.4, 52.8, 39.9, 28.6.

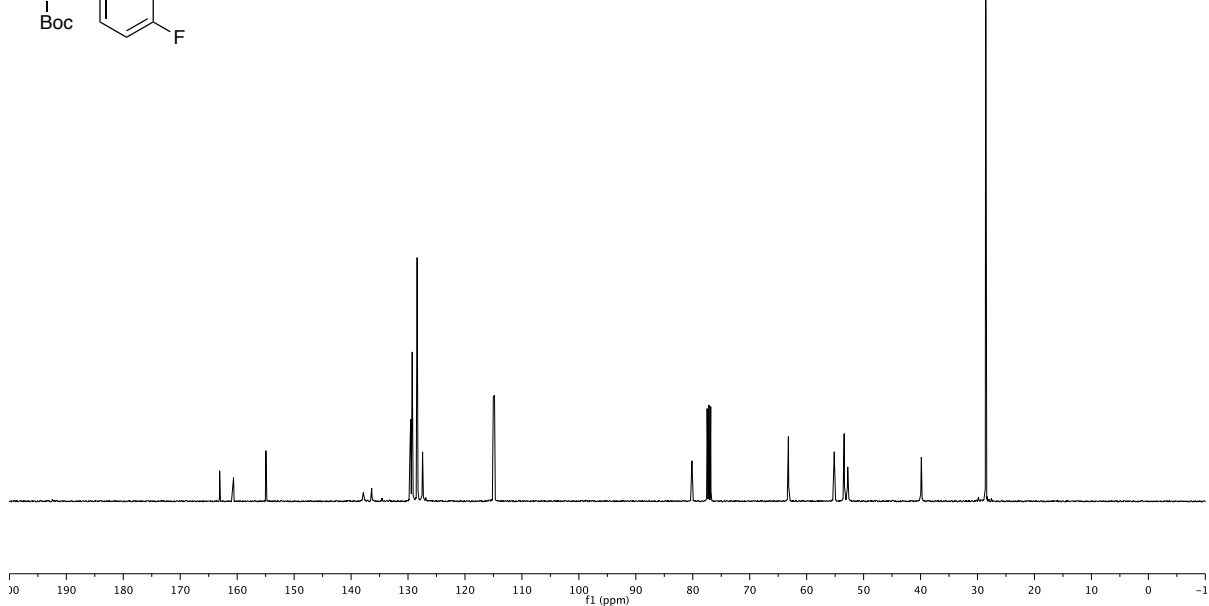

## 2-(4-Fluorophenyl)piperazine (23)

2-11-03-bhsieh.10.fid  
Sample fly-11-158-final-2  
group bode  
PRO CDCl<sub>3</sub> /opt/v bhsieh 2

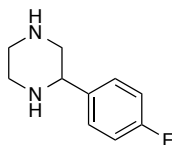

<sup>1</sup>H NMR (400 MHz, CDCl<sub>3</sub>) δ 7.36, 7.35, 7.34, 7.33, 7.33, 7.32, 7.31, 7.30, 7.01, 7.00, 7.00, 6.99, 6.98, 6.98, 6.97, 6.96, 6.95, 3.73, 3.72, 3.71, 3.70, 3.10, 3.09, 3.08, 3.07, 3.06, 3.05, 2.99, 2.98, 2.97, 2.96, 2.95, 2.94, 2.93, 2.91, 2.91, 2.88, 2.87, 2.84, 2.84, 2.82, 2.81, 2.67, 2.65, 2.64, 2.62, 1.79.

<sup>1</sup>H NMR (400 MHz, Chloroform-*d*) δ 7.33 (ddd, *J* = 8.6, 5.4, 2.6 Hz, 2 H), 7.01–6.95 (m, 2 H), 3.71 (dd, *J* = 10.2, 2.8 Hz, 1 H), 3.10–3.05 (m, 1 H), 2.99–2.91 (m, 3 H), 2.88–2.81 (m, 1 H), 2.64 (dd, *J* = 12.1, 10.2 Hz, 1 H), 1.79 (br, 2 H).

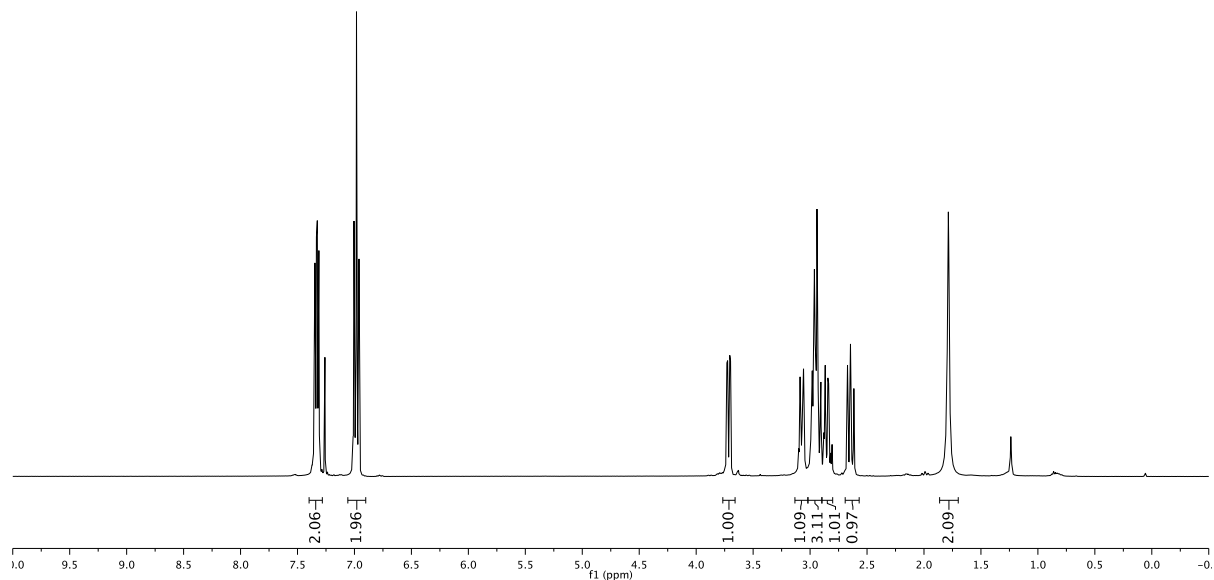

2-11-03-bhsieh.11.fid  
Sample fly-11-158-final-2  
group bode  
CAR CDCl<sub>3</sub> /opt/v bhsieh 2

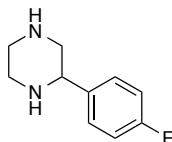

<sup>13</sup>C NMR (101 MHz, CDCl<sub>3</sub>) δ 163.4, 161.0, 138.7, 138.7, 128.5, 128.5, 115.4, 115.2, 61.4, 54.5, 47.9, 46.1.

<sup>13</sup>C NMR (101 MHz, Chloroform-*d*) δ 162.2 (d, *J* = 245.1 Hz), 138.7 (d, *J* = 3.1 Hz), 128.5 (d, *J* = 7.9 Hz), 115.3 (d, *J* = 21.2 Hz), 61.4, 54.5, 47.9, 46.1.

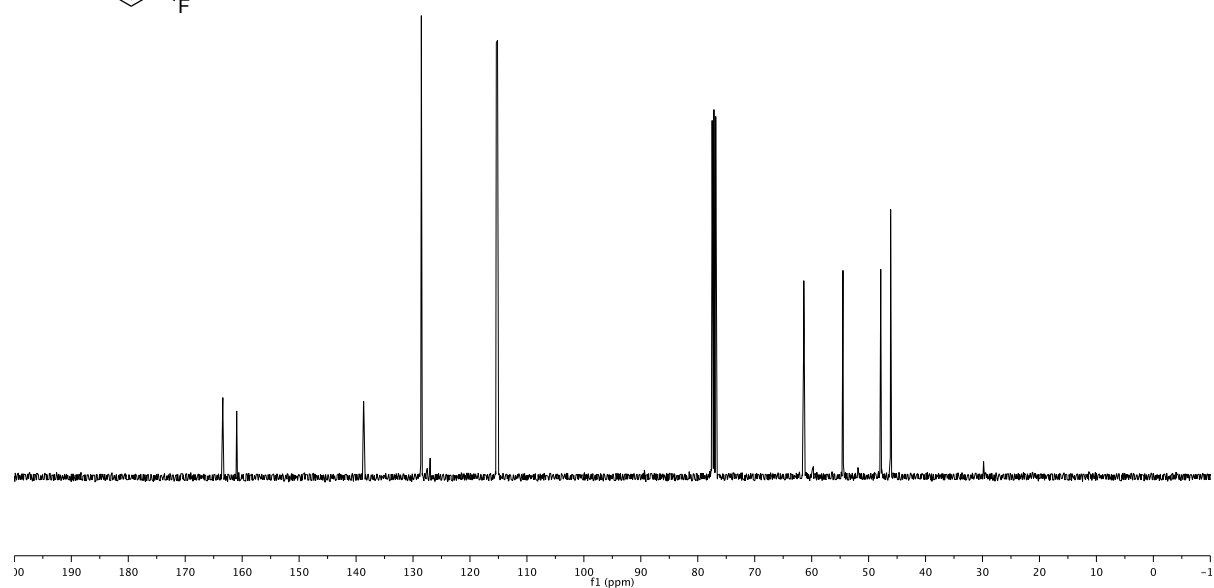

Supplement: Supplementary file 1 [file 4989046]
